# Supplementary material for: The comprehensive SARS-CoV-2 ‘hijackome’ knowledge base
Source: PubMed Central journal article supplement (PMC11628605; doi:10.1038/s41421-024-00748-y), 2024-12-09
Supplement: 41421_2024_748_MOESM10_ESM.pdf [file 41421_2024_748_MOESM10_ESM.pdf]

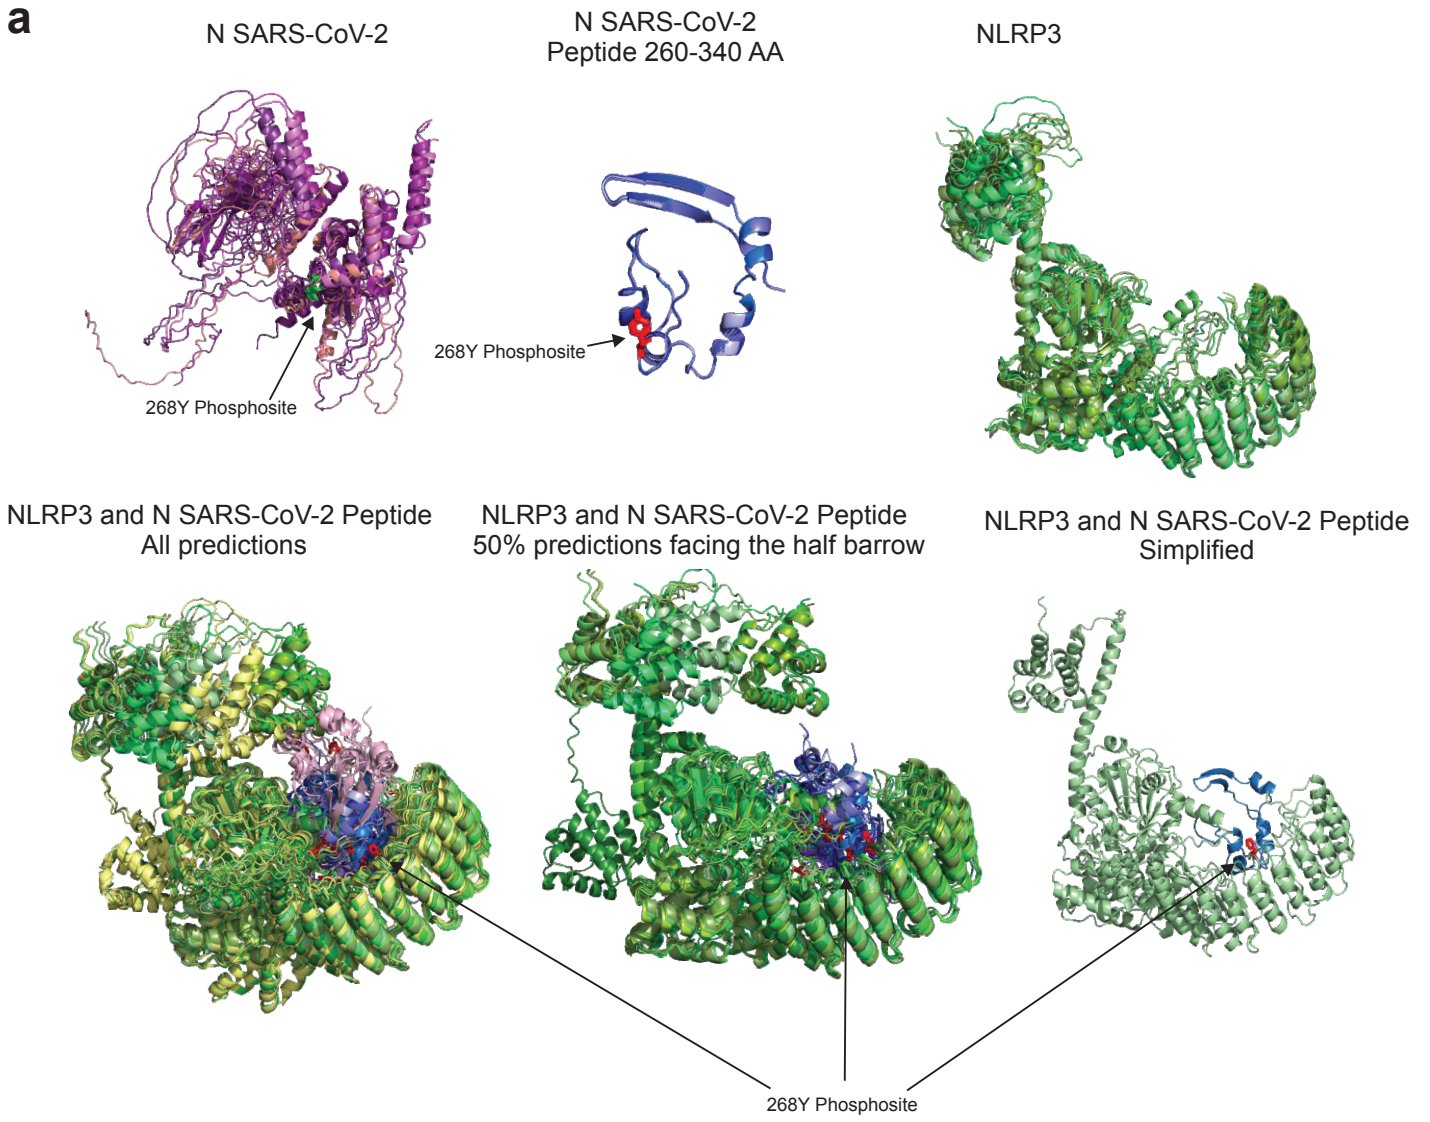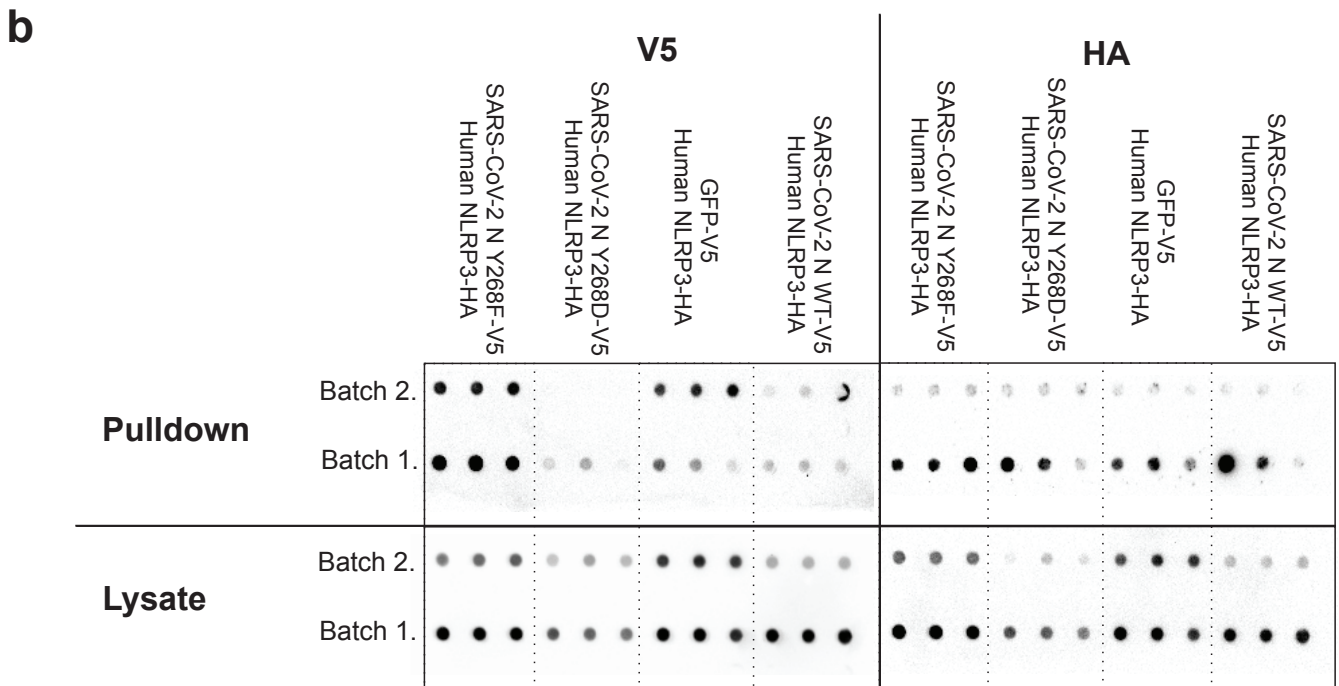

**Supplementary Fig S1. Structural Interaction and Co-Immunoprecipitation Analysis of NLRP3 with SARS-CoV-2 Nucleocapsid Protein.** **a)** Structural Predictions of NLRP3 and SARS-CoV-2 N Protein by AlphaFold. In the first row, from left to right, we present the following: an overlay of N SARS-CoV-2 AlphaFold 3 predictions in purple with the 268Y phosphosite localization shown in green; an overlay of N SARS-CoV-2 peptide (260-340 AA) AlphaFold 3 predictions with the 268Y phosphosite shown in red; and an overlay of NLRP3 AlphaFold predictions in green. In the second row, we display NLRP3 and N SARS-CoV-2 peptide with all predictions from AlphaFold 3. Yellow/pink indicates non-uniform structural predictions, usually with the 268Y phosphosite facing outside of the NLRP3 half-barrel. Green (NLRP3) and blue (N peptide) show predictions with the 268Y phosphosite facing the NLRP3 half-barrel. The 268Y phosphosite is indicated in red. Next, we show predictions where the 268Y phosphosite is facing the NLRP3 half-barrel, using the same color coding as in the previous image. Lastly, we present a simplified image of the NLRP3 and N peptide, using the same color scheme as in the last two images. **b)** co-immunoprecipitation experiments that assess the physical interaction between the SARS-CoV-2 N protein and NLRP3. The "Beads" and "Lysate" section shows the outcome of two experimental batches, with protein detection carried out using either the V5 or HA antibody. Various constructs of the SARS-CoV-2 N protein, including the wild-type and Y268F mutant, were tested alongside human NLRP3 tagged with HA. The "Lysate" section serves as a control, confirming the expression of these constructs in the cell lysates prior to immunoprecipitation.

Alpha      Beta      Delta      OmicronBA.1   OmicronBA.5   Mock  
1 8 16 36   1 8 16 36   1 8 16 36   1 8 16 36   1 8 16 36   1 1

Cell Cycle/  
Proliferation

Immune Response/  
Inflammation

Signal  
Transduction

Transcription  
Factors

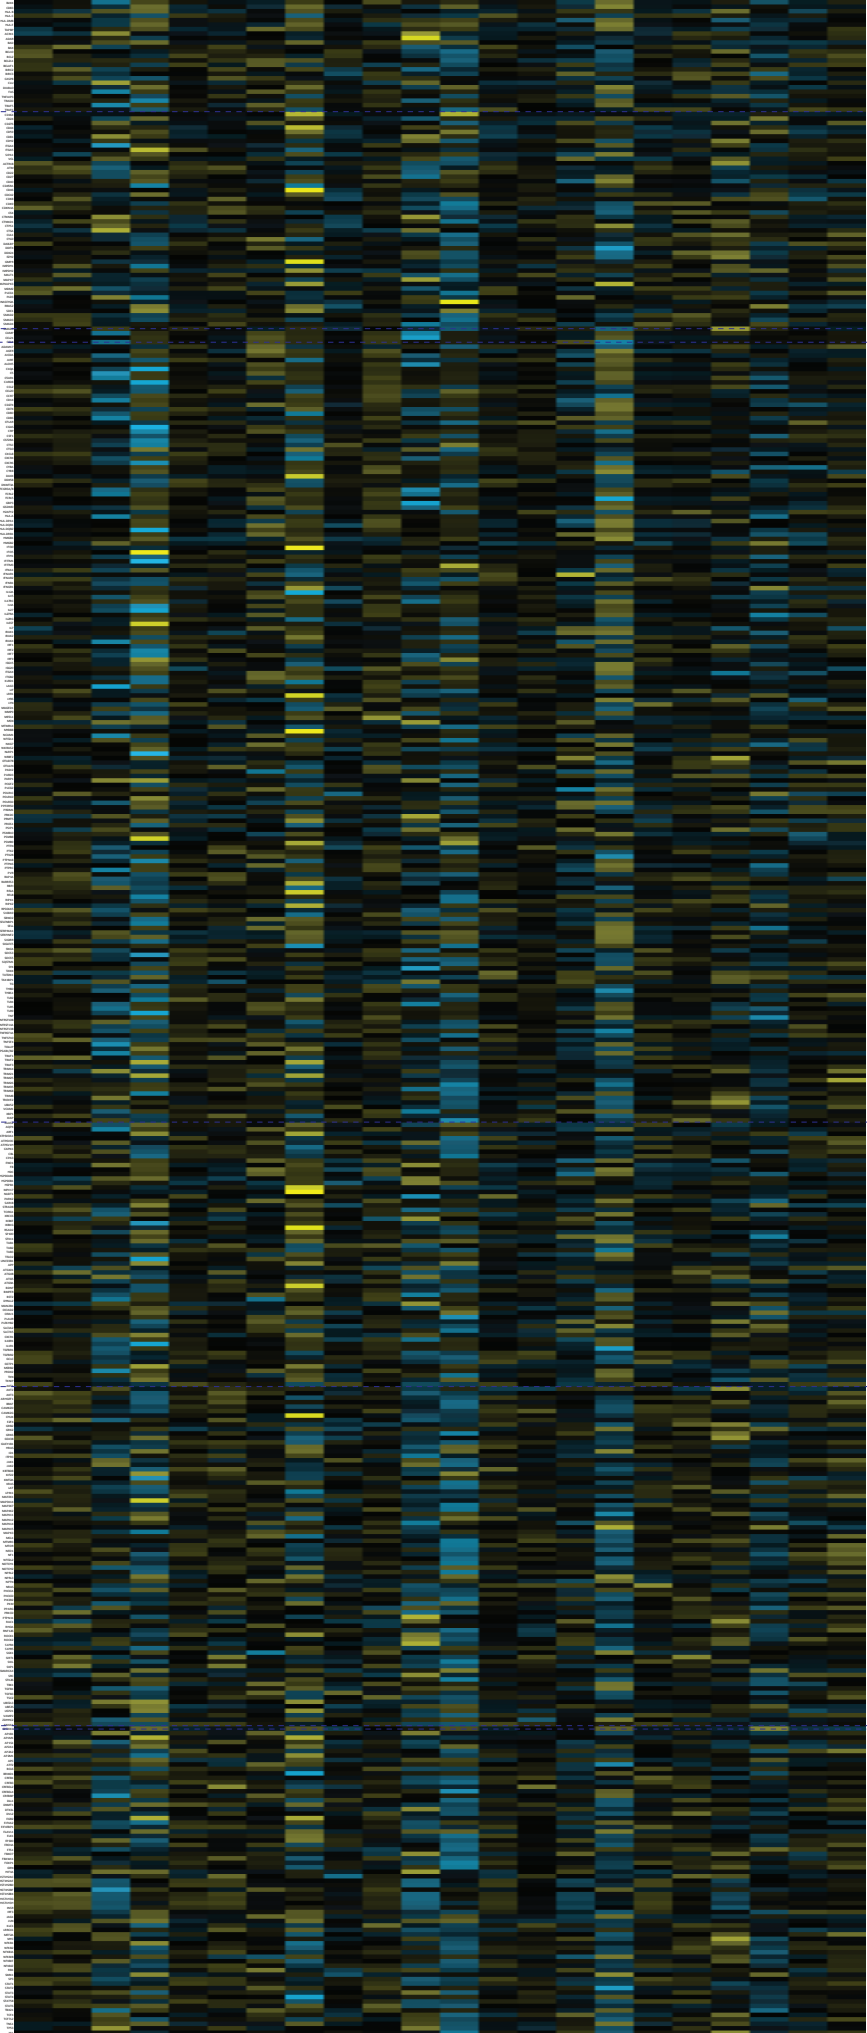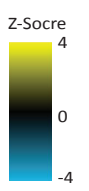

**Supplementary Fig S2. NanoString analysis.** Transcriptome expression analysis via the NanoString RNA analysis of the SARS-CoV-2 Variants (Alpha, Beta, Delta, Omicron BA.1, and Omicron BA.5) in various hours-post infection (hpi). 457 genes were identified across the analyzed samples. The genes are groups based on their molecular functions. The color gradient shows the Z-score (-4 to +4).

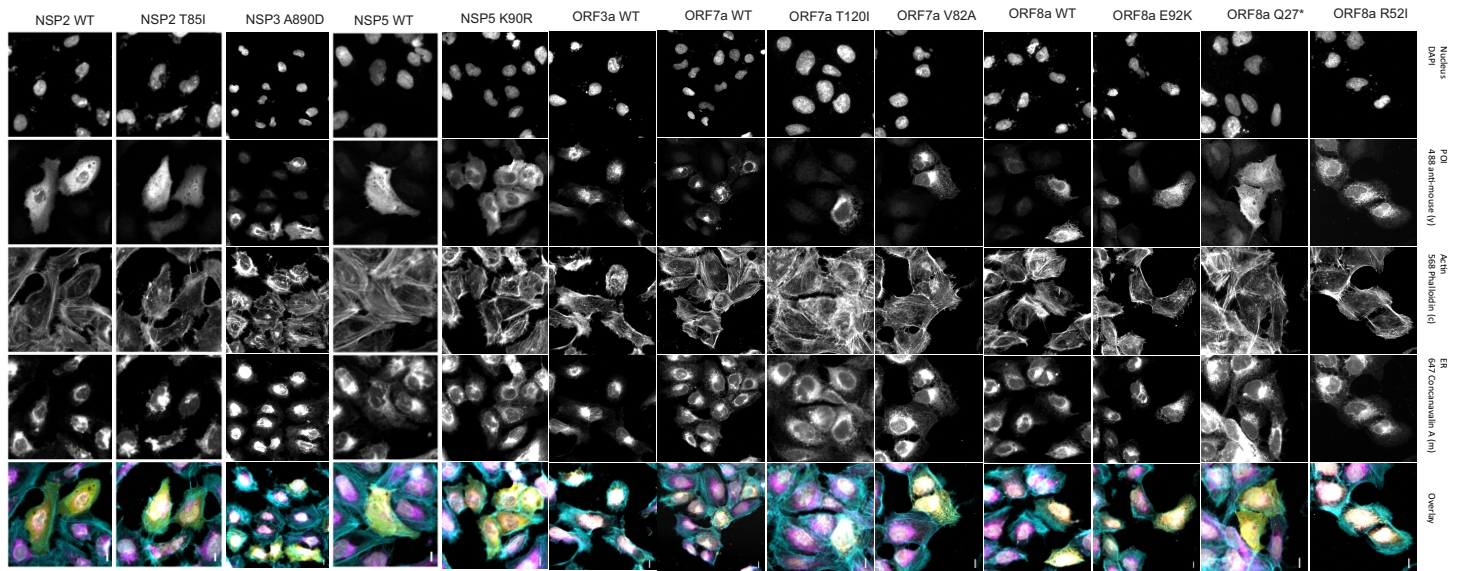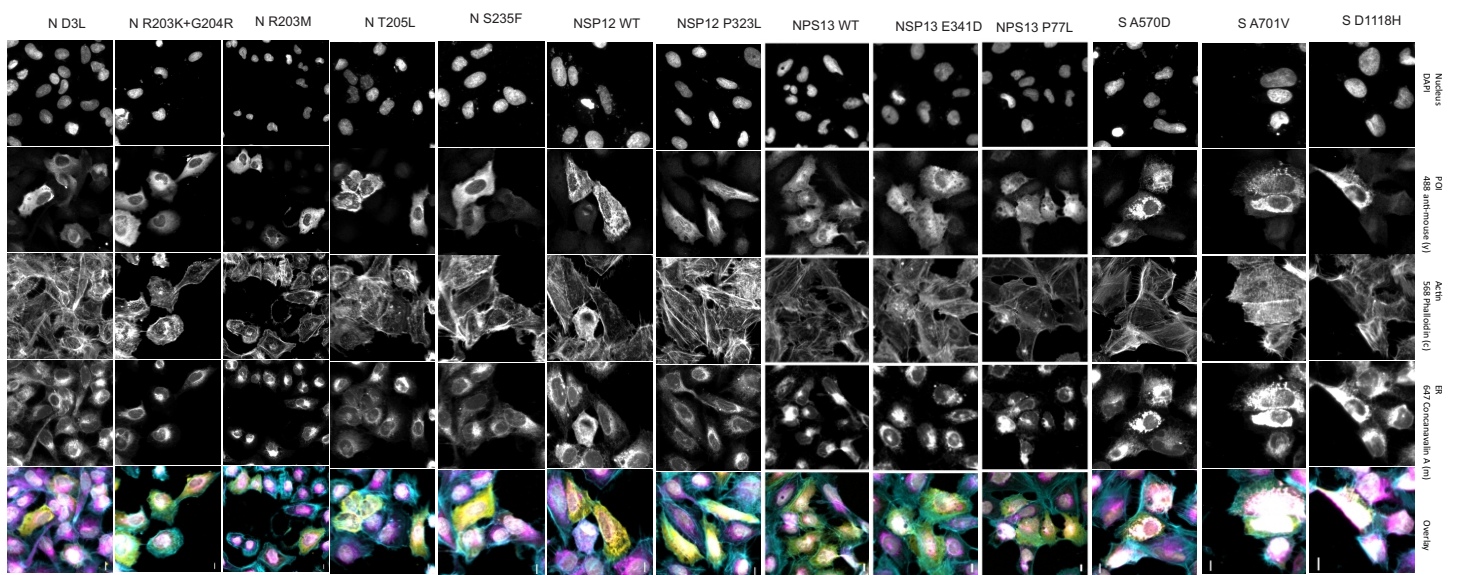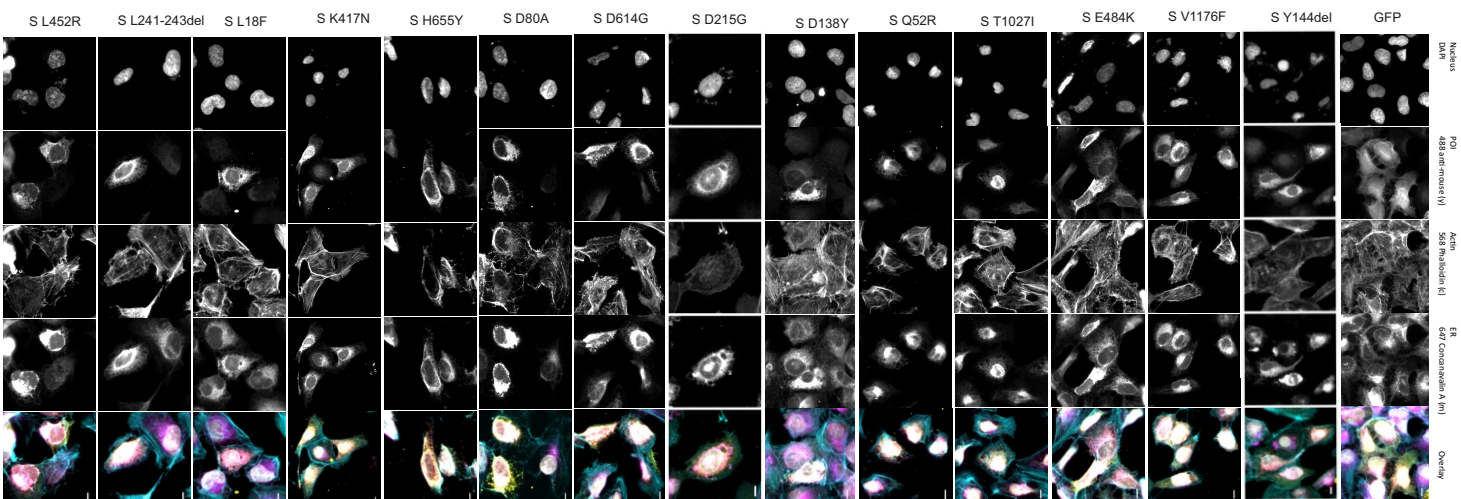

Scale bar, 10 microns (10/0.335=30pxs)

**Supplementary Fig S3. Remaining constructs of molecular microscopy and immunofluorescence analysis of the SARS-CoV-2 mutations.** Immunofluorescence microscopy images of all other SARS-CoV-2 proteins expressed from the MAC-tagged viral ORFs, transfected into U2-OS cells, and detected by immunofluorescence. Scale bar is 10  $\mu\text{m}$ .

**a**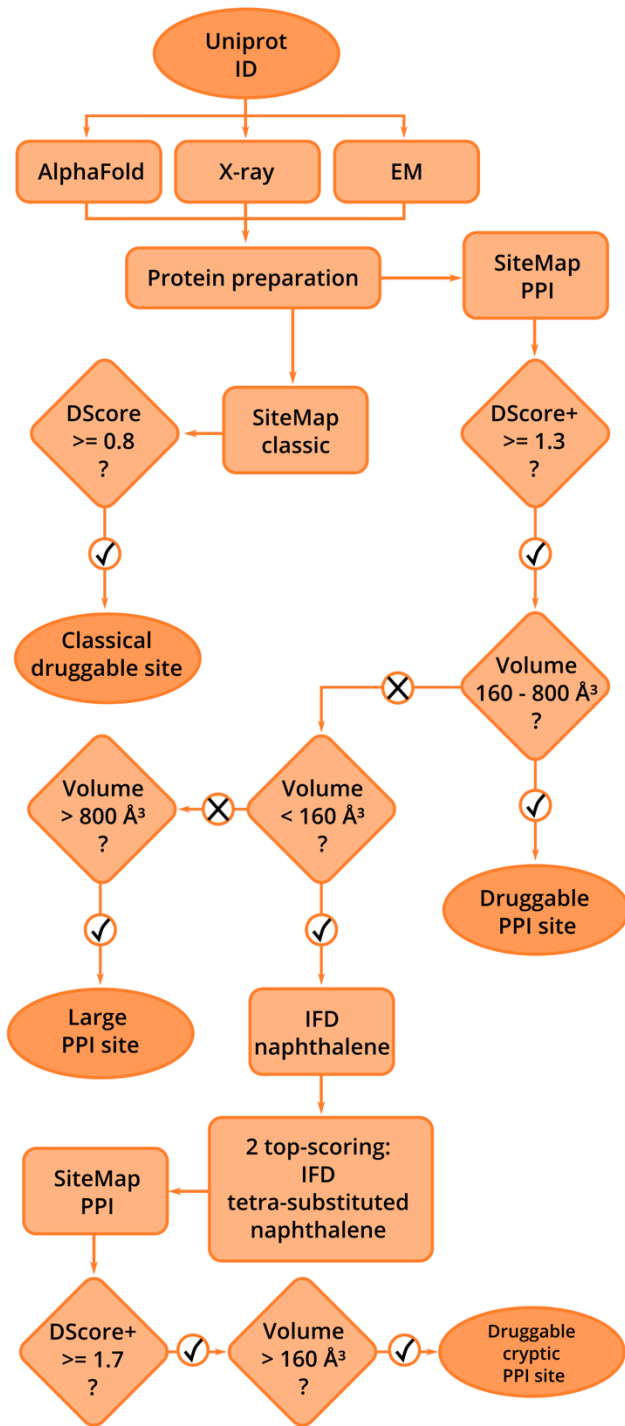**b**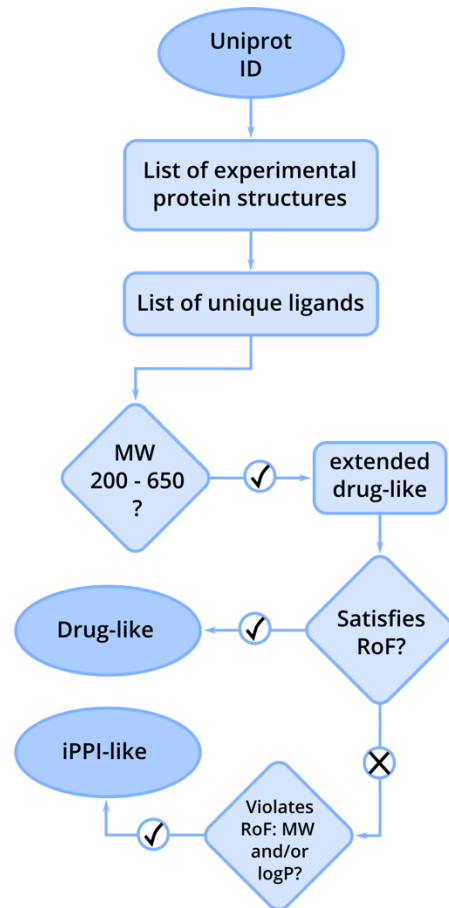**c**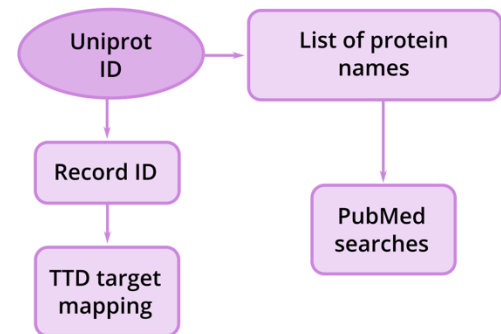

**Supplementary Fig S4. Schematic illustrations of workflows for target druggability assessment.** **a)** Structure-based pocket prediction and druggability analysis workflow with Schrödinger SiteMap and induced fit docking (IFD) steps to open cryptic pockets with limited protein flexibility modeling. PPI = protein:protein interaction. **b)** Evaluation of properties of ligands in experimental target structures. RoF = Rule-of-Five; MW = molecular weight; iPPI = PPI inhibitor. **c)** Workflow to assess literature coverage by PubMed searches and cross-analysis with the Therapeutic Target Database (TTD).
