# Supplementary material for: The comprehensive SARS-CoV-2 ‘hijackome’ knowledge base
Source: Cell Discov. 2024 Dec 9;10:125. doi: 10.1038/s41421-024-00748-y (PMC11628605; doi:10.1038/s41421-024-00748-y)
Supplement: Supplementary file 1 — Supplementary Table S1 [file 41421_2024_748_MOESM1_ESM.xlsx]

## Sheet: Info
	EV01 - List of mutations and constructs in this study
	Sheet:	Description
	Variant mutation list	List of mutations in SARS-CoV-2 variants and selected constructs for BioID study
	Primer list	Primers used in this study

## Sheet: Variant mutation list
	WHO label	Pango	GISAID clade	Nextstrain clade	Earliest documented samples	Date of designation	Mutations AA	Chosen for BioID
	Alpha	B.1.1.7	GRY	20I (V1)	United Kingdom, Sep-2020	VOC: 18-Dec-2020; Previous VOC: 09-Mar-2022	Spike A570D	✓
							Spike D614G	✓
							Spike D1118H	✓
							Spike H69del-V70del
							Spike N501Y	✓
							Spike P681H	✓
							Spike S982A	✓
							Spike T716I	✓
							Spike Y144del	✓
							N D3L	✓
							N R203K	✓
							N G204R
							N S235F	✓
							ORF8 Q27stop	✓
							ORF8 R52I	✓
							ORF8 Y73C	✓
							NSP3 A890D	✓
							NSP3 I1412T
							NSP3 T183I
							NSP6 S106del-G107del-F108del	✓
							NSP12 P323L	✓
	Beta	B.1.351	GH/501Y.V2	20H (V2)	South Africa, May-2020	VOC: 18-Dec-2020; Previous VOC: 09-Mar-2022	Spike A701V
							Spike D80A	✓
							Spike D215G	✓
							Spike D614G	✓
							Spike E484K	✓
							Spike K417N	✓
							Spike L242del-A243del-L244del	✓
							Spike N501Y	✓
							E P71L	✓
							N T205I	✓
							ORF3a Q57H	✓
							NSP2 T85I	✓
							NSP3 K837N
							NSP3 S794L
							NSP5 K90R	✓
							NSP6 S106del-G107del-F108del	✓
							NSP12 P323L	✓
	Gamma	P.1	GR/501Y.V3	20J (V3)	Brazil, Nov-2020	VOC: 11-Jan-2021; Previous VOC: 09-Mar-2022	Spike D138Y	✓
							Spike D614G	✓
							Spike E484K	✓
							Spike H655Y	✓
							Spike K417T
							Spike L18F	✓
							Spike N501Y	✓
							Spike P26S	✓
							Spike R190S	✓
							Spike T20N
							Spike T1027I	✓
							Spike V1176F	✓
							N G204R
							N P80R	✓
							N R203K
							ORF3a S253P	✓
							ORF8a E92K	✓
							NSP3 K977Q	✓
							NSP3 S370L
							NSP6 S106del-G107del-F108del	✓
							NSP12 P323L	✓
							NSP13 E341D	✓
	Delta	B.1.617.2	G/478K.V1	21A, 21I, 21J	India, Oct-2020	VOI: 4-Apr-2021	Spike D614G	✓
						VOC: 11-May-2021	Spike D950N
							Spike E156G
						Previous VOC: 7-Jun-2022	Spike F157del
							Spike G142D
							Spike L452R	✓
							Spike P681R	✓
							Spike R158del
							Spike T19R
							Spike T478K	✓
							M I82T
							N D63G	✓
							N D377Y	✓
							N R203M	✓
							ORF3a S26L
							ORF7a T120I	✓
							ORF7a V82A	✓
							NSP3 P822L
							NSP4 A446V
							NSP6 T181IS
							NSP12 G671S
							NSP12 P323L	✓
							NSP13 P77L	✓
	Omicron*	BA.1, BA.5	GR/484A	21K, 22B	Multiple countries, Nov-2021 Botswana/Hong Kong/South Africa	VUM: 24-Nov-2021 VOC: 26-Nov-2021	Spike A67V	✓
							Spike D614G	✓
							Spike D796Y	✓
							Spike E484A	✓
							Spike G142D	✓
							Spike G339D	✓
							Spike G446S	✓
							Spike G496S	✓
							Spike H69del-V70del	✓
							Spike H655Y	✓
							Spike ins214EPE	✓
							Spike K417N	✓
							Spike L212I	✓
							Spike L981F	✓
							Spike N211del	✓
							Spike N440K	✓
							Spike N501Y	✓
							Spike N679K	✓
							Spike N764K	✓
							Spike N856K	✓
							Spike N969K	✓
							Spike P681H	✓
							Spike Q493R	✓
							Spike Q498R	✓
							Spike Q954H	✓
							Spike S371L	✓
							Spike S373P	✓
							Spike S375F	✓
							Spike S477N	✓
							Spike T95I	✓
							Spike T478K	✓
							Spike T547K	✓
							Spike V143del-Y144del- Y145del	✓
							E T9I
							M A63T
							M D3G
							M Q19E
							N E31del
							N G204R
							N P13L
							N R32del
							N R203K
							N S33del
							NSP3 A1892T
							NSP3 K38R
							NSP3 L1266I
							NSP3 S1265del
							NSP3 T1004I
							NSP4 T492I
							NSP5 P132H
							NSP6 I189V
							NSP6 L105del-S106del-G107del-F108del
							NSP12 P323L	✓
							NSP14 I42V
	*21K/BA.1 entire mutated spike protein in one construct

## Sheet: Primer list
Primer list
					nt	GC %	Tm
N	R203M	Forward	agctccaTGggcaccag		17 nt	65% GC	Tm: 68°C			T	time		DNA template:	1 µl ( 1-10 ng)
		Reverse	tgccCAtggagcttcctg		18 nt	61% GC	Tm: 68°C			95	10		5x Q5 Reation Buffer	6 µl
									5 cycles	95	30		Primers	3 µl
N	R203k+G204R	Forward	aagctccaAaAgcaccagccc		21 nt	57% GC	Tm: 71°C			Tm1	30		dNTP mix	0,75 µl
		Reverse	gctggtgcTtTtggagcttcctg		21 nt	57% GC	Tm: 71°C			72	01:30:00		5 X Q5 GC buff	6 µl
										95	10		MQ	12.95 µl
NSP4	L438P	Forward	TCCGCCTACCCAGTATAATC		20 nt	50% GC	Tm: 63°C		25 cycles	95	30		Q5 Polymerase	0,3 µl
		Reverse	GTAGGCGGAAGCAGG		15 nt	67% GC	Tm: 63°C			Tm2	30
										72	01:30:00
NSP3	K977Q	Forward	CCCAGTACCTGGTGC		15 nt	67% GC	Tm: 62°C			72	03:00:00
		Reverse	GTACTGGGTGGCCTG		15 nt	67% GC	Tm: 62°C
NSP5	K90R	Forward	CTGAGGGTGGACACC		15 nt	67% GC	Tm: 62°C
		Reverse	CACCCTCAGCTTCAGC		16 nt	63% GC	Tm: 63°C
NSP3	T183I	Forward	ccaccaTcatccagacc		17 nt	59% GC	Tm: 62°C
		Reverse	ATGATGGTGGTCTGGTTG		18 nt	50% GC	Tm: 62°C
NSP3	I1412T	Forward	ATCACCATCTGGTTCCTG		18 nt	50% GC	Tm: 61°C
		Reverse	GATGGTGATGTTGATCAGC		19 nt	47% GC	Tm: 61°C
NSP3	A890D	Forward	GCCGATAACTTCTGCGC		17 nt	59% GC	Tm: 64°C
		Reverse	GTTATCGGCCTCGCC		15 nt	67% GC	Tm: 63°C
NSP2	T85I	Forward	GATATATTCAATGGTGAGTGCC		22 nt	41% GC	Tm: 60°C
		Reverse	GAATATATCGAACTTTTTCGCCA		23 nt	35% GC	Tm: 60°C
NSP13	E341D	Forward	GTGGATTGCTTCGACAAGTTC		21 nt	48% GC	Tm: 64°C
		Reverse	GCAATCCACACGAGCTC		17 nt	59% GC	Tm: 64°C
NSP12	P314L	Forward	GGCCTTCTGGTGCGTAAG		18 nt	61% GC	Tm: 66°C
		Reverse	CAGAAGGCCGAAGCTGG		17 nt	65% GC	Tm: 66°C
ORF3a	Q57H	Forward	ttccaCtcagcgtctaag		18 nt	50% GC	Tm: 61°C
		Reverse	TGAGTGGAATACCGCG		16 nt	56% GC	Tm: 61°C
ORF3a	S253P	Forward	AGCCCCGGTGTAGTG		15 nt	67% GC	Tm: 64°C
		Reverse	ACCGGGGCTTCCATC		15 nt	67% GC	Tm: 65°C
ORF8	E92K	Forward	caaAaacccaaactgggg		18 nt	50% GC	Tm: 61°C
		Reverse	GGGTTTTTGGCAGTTGATC		19 nt	47% GC	Tm: 62°C
ORF8	R52I	Forward	gccATaaaaagcgcacc		17 nt	53% GC	Tm: 62°C
		Reverse	TTTTATGGCCCCTACCC		17 nt	53% GC	Tm: 61°C
S	D1118H	Forward	accCacaacaccttcg		16 nt	56% GC	Tm: 62°C
		Reverse	gttgtGggtggtgatgatc		19 nt	53% GC	Tm: 63°C
S	D138Y	Forward	aacTacccattcctggga		18 nt	50% GC	Tm: 62°C
		Reverse	tgggtAgttgcagaactg		18 nt	50% GC	Tm: 62°C
S	P26S	Forward	gccaTctgcctacacc		16 nt	63% GC	Tm: 63°C
		Reverse	ggcagAtggcagctg		15 nt	67% GC	Tm: 64°C
S	R190S	Forward	ctgagTgagttcgtgttc		18 nt	50% GC	Tm: 60°C
		Reverse	ctcActcaggttcttgaag		19 nt	47% GC	Tm: 59°C
S	S982A	Forward	ctgGctaggctggac		15 nt	67% GC	Tm: 62°C
		Reverse	cctagCcaggatgtcg		16 nt	63% GC	Tm: 62°C
S	T1027I	Forward	gccaTcaagatgtccgaatg		20 nt	50% GC	Tm: 64°C
		Reverse	tcttgAtggcagccagg		17 nt	59% GC	Tm: 65°C
S	T716I	Forward	ccaaTcaacttcaccatc		18 nt	44% GC	Tm: 57°C
		Reverse	gttgAttgggatggc		15 nt	53% GC	Tm: 57°C
S	V1176F	Forward	tctTtTgtgaacatccagaag		21 nt	38% GC	Tm: 60°C
		Reverse	acAaAagaggcgttgattc		19 nt	42% GC	Tm: 60°C
S	Q52R	Forward	accAGggacctgttcc		16 nt	63% GC	Tm: 64°C
		Reverse	gtccCTggtagagtgcag		18 nt	61% GC	Tm: 65°C
N	D3L	Forward	atgtccCTcaacggtc		16 nt	56% GC	Tm: 61°C
		Reverse	gttgAGggacatgcc		15 nt	60% GC	Tm: 60°C
NSP6	S107-109	Forward	acaccagcctgaagctgaaggactgcgtgatg		32 nt	56% GC	Tm: 78°C
		Reverse	agcttcaggctggtgtccaccatgtccag		29 nt	59% GC	Tm: 78°C
N	S235F	Forward	gatgtTcggaaagggtcagc		20 nt	55% GC	Tm: 66°C
		Reverse	ccgAacatcttgctttccagc		21 nt	52% GC	Tm: 67°C
S	Y144del	Forward	gagtgtaccacaagaac		17 nt	47% GC	Tm: 56°C
		Reverse	gtacactcccaggaa		15 nt	53% GC	Tm: 56°C
S	P681H	Forward	acagccACagaaggg		15 nt	60% GC	Tm: 61°C
		Reverse	tctGTggctgttggtc		16 nt	56% GC	Tm: 62°C
S	L241-243del	Forward	atctctggaaccaacggc		18 nt	56% GC	Tm: 65°C
		Reverse	agagatggcgtggaacc		17 nt	59% GC	Tm: 65°C
S	L18F	Forward	aacTtTaccaccagaaccc		19 nt	47% GC	Tm: 62°C
		Reverse	tggtAaAgttcacgcactg		19 nt	47% GC	Tm: 62°C
S	K417T	Forward	ggaaaCgatcgccgac		15 nt	67% GC	Tm: 63°C
		Reverse	gatcGtttccggtctgac		17 nt	59% GC	Tm: 62°C
S	H655Y	Forward	gagTacgtgaacaactcctacG		22 nt	50% GC	Tm: 65°C
		Reverse	acgtActcggctccg		15 nt	67% GC	Tm: 64°C
S	D80A	Forward	attcgCcaacccagtg		16 nt	56% GC	Tm: 62°C
		Reverse	ttgGcgaatctcttggtg		18 nt	50% GC	Tm: 62°C
S	D215G	Forward	agggGcctgccacag		15 nt	73% GC	Tm: 69°C
		Reverse	caggCccctcaccagg		16 nt	75% GC	Tm: 69°C
S	A570D	Forward	catcgAcgacaccacc		16 nt	63% GC	Tm: 63°C
		Reverse	tgtcgTcgatgtctctacc		19 nt	53% GC	Tm: 63°C
N	T205I	Forward	agaggcaTcagcccag		16 nt	63% GC	Tm: 64°C
		Reverse	ggctgAtgcctctgg		15 nt	67% GC	Tm: 63°C
E	P71L	Forward	ggtgcTggatctcctc		16 nt	63% GC	Tm: 62°C
		Reverse	gatccAgcaccctgc		15 nt	67% GC	Tm: 63°C
S	N501Y	Forward	aaccTacggagtgggatac		19 nt	53% GC	Tm: 63°C
		Reverse	ccgtAggttggctgG		15 nt	67% GC	Tm: 63°C
S	K417N	Forward	cggaaaTatcgccgactac		19 nt	53% GC	Tm: 63°C
		Reverse	gcgatAtttccggtctgAC		19 nt	53% GC	Tm: 63°C
S	A701V	Forward	gggc gTt gaaaacagC		16 nt	56% GC	Tm: 62°C
		Reverse	ttttc aAc gcccaggC		16 nt	56% GC	Tm: 63°C
S	D614G	Forward	ccag gGc gtgaactg		15 nt	67% GC	Tm: 63°C
		Reverse	ttcac gCc ctggtacag		17 nt	59% GC	Tm: 64°C
S	E484K	Forward	Gagtg Aaa ggattcaactgctac		23 nt	43% GC	Tm: 63°C
		Reverse	aatcc ttT cactccgttgc		19 nt	47% GC	Tm: 63°C
S	L452R	Forward	ctaccGgtacaggctgttc		19 nt	58% GC	Tm: 65°C
		Reverse	tgtacCggtagttgtagttgc		21 nt	48% GC	Tm: 64°C
S	T478K	Forward	tctaAAccatgcaacgg		17 nt	47% GC	Tm: 59°C
		Reverse	atggTTtagatccagcc		17 nt	47% GC	Tm: 58°C
S	P681R	Forward	cagcGcaagaagggc		15 nt	67% GC	Tm: 64°C
		Reverse	tcttgCgctgttggtc		16 nt	56% GC	Tm: 63°C
S	D950N	Forward	cagAacgtggtgaacc		16 nt	56% GC	Tm: 60°C
		Reverse	cacgtTctgcagctttc		17 nt	53% GC	Tm: 61°C
ORF7a	T120I	Forward	aagaTtgaggacccagc		17 nt	53% GC	Tm: 61°C
		Reverse	ctcaAtctttcttttcagtgtaaagc		26 nt	35% GC	Tm: 62°C
ORF7a	V82A	Forward	atctgCgtcccccaaac		17 nt	59% GC	Tm: 65°C
		Reverse	ggacGcagatcgagcc		16 nt	69% GC	Tm: 66°C
N	D377Y	Forward	gccgTcgaaacccag		15 nt	67% GC	Tm: 64°C
		Reverse	gtttcgAcggccttcttc		18 nt	56% GC	Tm: 64°C
N	R203M	Forward	tccaTGggcaccagcc		16 nt	69% GC	Tm: 69°C
		Reverse	tgccCAtggagcttcctg		18 nt	61% GC	Tm: 68°C
N	D63G	Forward	gaagGcctgaagttccc		17 nt	59% GC	Tm: 63°C
		Reverse	caggCcttcctttccg		16 nt	63% GC	Tm: 63°C
NSP13	P77L	Forward	caagcTccctatcagcttc		19 nt	53% GC	Tm: 62°C
		Reverse	agggAgcttgtggga		15 nt	60% GC	Tm: 63°C
N	P80R	Forward	tctcGagacgaccagatc		18 nt	56% GC	Tm: 63°C
		Reverse	tctCgagagctgttggtg		18 nt	56% GC	Tm: 64°C
ORF8	Q27stop	Forward	ttgtacaCAGgacccagc		18 nt	56% GC	Tm: 64°C
		Reverse	tgggtcCTGtgtacaagac		19 nt	53% GC	Tm: 64°C
