# Supplementary material for: The comprehensive SARS-CoV-2 ‘hijackome’ knowledge base
Source: Cell Discov. 2024 Dec 9;10:125. doi: 10.1038/s41421-024-00748-y (PMC11628605; doi:10.1038/s41421-024-00748-y)
Supplement: Supplementary file 3 — Supplementary Table S3 [file 41421_2024_748_MOESM3_ESM.xlsx]

## Sheet: Info
	EV03 - Phosphory enrichment taple
	Sheet	Description
	Clusterplot Data	Data corresponsing to the figure 3 clusterplot
	P-site Data	Phosphorysite Data
	Phosporylated_protein Data	Phosphoryproteins Data
	DAVID Alpha	DAVID GO enrichmet for Alpha variant seen in figure 3
	DAVID Beta	DAVID GO enrichmet for Beta variant seen in figure 3
	DAVID Delta	DAVID GO enrichmet for Delta variant seen in figure 3
	DAVID Omicron BA.1	DAVID GO enrichmet for Omicron BA.1 variant seen in figure 3
	DAVID Omicron BA.5	DAVID GO enrichmet for Omicron BA.5 variant seen in figure 3

## Sheet: P-site Data
Protein	Converted to Human	P-site	Mock_Rep_1	Mock_Rep_2	Mock_Rep_3	Beta-16_Rep_1	Beta-16_Rep_2	Beta-16_Rep_3	Beta-1_Rep_1	Beta-1_Rep_2	Beta-1_Rep_3	Beta-36_Rep_1	Beta-36_Rep_2	Beta-36_Rep_3	Beta-8_Rep_1	Beta-8_Rep_2	Beta-8_Rep_3	Alpha-16_Rep_1	Alpha-16_Rep_2	Alpha-16_Rep_3	Alpha-1_Rep_1	Alpha-1_Rep_2	Alpha-1_Rep_3	Alpha-36_Rep_1	Alpha-36_Rep_2	Alpha-36_Rep_3	Alpha-8_Rep_1	Alpha-8_Rep_2	Alpha-8_Rep_3	Delta-16_Rep_1	Delta-16_Rep_2	Delta-16_Rep_3	Delta-1_Rep_1	Delta-1_Rep_2	Delta-1_Rep_3	Delta-36_Rep_1	Delta-36_Rep_2	Delta-36_Rep_3	Delta-8_Rep_1	Delta-8_Rep_2	Delta-8_Rep_3	Omicron BA.1-16_Rep_1	Omicron BA.1-16_Rep_2	Omicron BA.1-16_Rep_3	Omicron BA.1-1_Rep_1	Omicron BA.1-1_Rep_2	Omicron BA.1-1_Rep_3	Omicron BA.1-36_Rep_1	Omicron BA.1-36_Rep_2
A0A0D9QUI5:S154	TERF2IP	S154	7.89026193385017	5.12173386817569	8.56805513727769	11.0517771683435	7.76845743612628	6.33949238752289	7.24272113711366	11.5068756102567	11.7249828138179	11.8408243564388	11.2910638497539	11.5291200428439	12.2471847089943	8.87540753869293	11.4954464229169	11.3999149332026	9.2474186594332	11.5995880271487	6.07201889405453	7.42201429850788	7.62498239660063	11.2266288398145	11.7233354303036	11.6778013885202	11.7277123997912	7.7450033665842	11.206846359871	11.7019237420758	11.6062279593123	5.85384466257483	11.8036350199847	11.6462301275264	10.9932703513721	11.2413067650309	8.63989519870766	11.7646819988821	11.4900847572032	7.42106867862689	11.9230383409547	10.6552404571494	11.2647673516921	8.51789816846111	11.7227101514537	7.01957633004149	11.6801450202154	11.5808339433152	9.01288370287497
A0A0D9QUM3:S139	BCAR1	S139	4.55071761802222	6.12668979810786	8.76173278560166	5.27165157494676	11.7370597276938	11.4723566845856	7.62370027724756	12.3236925943864	11.7420012323747	7.95617648947608	6.51984001113681	11.2106865743035	12.5746263857633	12.9636684599808	12.7167360572159	8.41719008836739	12.6169769881152	11.959148779082	11.6941279233973	11.9707007543644	12.1903873142702	9.15853244535883	10.8264565063314	9.32917809398841	12.6281397101678	13.3534085808871	13.0661078390079	8.83420162504189	9.48464601906578	8.77590108520638	8.9175909891321	12.797846780842	12.4270958314079	10.8761090456841	8.65349790733119	11.4174493786588	11.3940899053559	13.093131894245	12.6644932355931	10.8208865822412	11.4631043624392	11.4465212350223	11.5507548776519	12.4089133060586	5.48052418534887	8.03390067353106	10.9565570258547
A0A0D9QUN2:S1520	PCF11	S1520	11.2824282544752	11.8262801019639	11.3183544827789	11.933226195569	11.5410229723897	11.9197149813552	11.520583411131	11.4340545534688	11.5807185112504	11.0367470259146	10.6448408936462	10.8841115177772	12.3713833592179	12.237414660589	12.2792670852658	12.5198149371319	11.7106568243185	12.6381564801374	11.185716161639	11.0946807205517	11.1880846327281	10.8508549066337	10.3071971668203	10.154230236171	12.2362055862697	10.8788358403586	11.4559043837765	12.6405541128694	11.7347293764536	12.0079417928283	11.0406334488278	10.117795559277	10.4601408477954	9.10654090745028	10.2262160722492	11.2069879289646	11.8695558808394	11.6737135334104	12.4287804256836	12.1551099865969	11.9153951253647	11.8705099704328	10.5999164409888	10.8453897636182	8.95333462549417	11.6461640316238	10.9300980681481
A0A0D9QUN6:S306	EXOSC9	S306	12.3316934340468	13.4927999658818	8.92393215004187	12.0372378443093	12.5503275068165	12.5369481485449	11.3837663096173	9.31144386155372	11.8780452455719	12.7412751931106	12.2630830380693	12.4531961067689	8.15628105309497	9.19720256521362	12.7756700476119	12.5856945512013	13.281508065416	13.3691861653851	8.49449786959145	5.6445399130092	7.38217295701221	12.7749848340024	12.8237529224456	4.14475710334492	8.99592210027414	12.1457221630599	12.3852823148094	8.36515150914609	12.9134893837291	13.1005968633401	12.4591520223209	7.83530376994738	12.3811524025963	12.3541886486916	8.66896014064226	12.8227222978187	7.5858773113094	8.1699299444954	13.0794013963656	9.4476791897082	12.4011710621328	12.4595684793878	5.24589874754623	12.2653604292218	4.99941880640406	12.6190642101068	12.5847086630924
A0A0D9QUQ5:S173	CBFB	S173	9.47108356318678	4.12934278518301	6.96696092863315	8.72396702253756	8.740113915025	9.12801798133527	8.95990734964294	1.95740630224907	8.24480581225023	8.11107106795407	8.88296822321606	8.59183764830685	8.50860491455238	8.23777002791863	9.24109467968835	6.1086681689664	9.47440290735996	9.15147449941596	8.76899952735375	9.81564798929089	8.65979780132815	6.01806801794242	9.35369077682412	9.01500348755349	10.0515074537407	8.36411061916087	8.15791444271151	10.0981629755696	9.54791619635305	9.9207689665249	9.16816132213163	9.21047880806619	8.57550300113901	4.55018784637332	8.0796865899009	7.73529233306221	10.1814811544871	9.46174866990357	9.90621571684126	6.14877950043281	9.40140358108914	8.02589232000252	8.21587420643744	9.29153575866408	8.38142281746512	9.92324557650319	8.59384792193699
A0A0D9QUV4:S622	MAPT	S622	2.02485028497472	12.929096917899	9.13052299827454	14.4369093555861	13.2562213790934	13.4191496629369	13.6865565642742	12.8341928081274	7.31512321994992	13.2333711682427	13.0409825102564	12.8748547526263	6.19273226631353	9.00111029254957	13.7099643944081	14.3796970916219	13.6600024927479	14.1968861865966	7.42682404343837	7.57289863109259	13.3177312010609	14.1069256806338	13.3544511932314	7.13212029959896	13.9132015271174	13.4281271086513	13.544636661209	14.5247354216263	13.6284011072378	13.7735773825024	13.5469080923801	9.01205506278025	12.7379287352844	13.9504397628826	13.628375653265	13.8978796324049	14.193258312438	13.5640798392923	6.28229671140406	14.2287455316245	13.0127295419611	13.4575965278105	13.7162189842586	13.1653123406582	7.13051365901815	14.3315297667067	13.853197415571
A0A0D9QUV7:S1045	KANSL1	S1045	9.34325456376728	10.8543634180844	10.9481842628297	9.04884404662539	11.8453072798687	11.9552240200189	10.5985195971992	11.8106992468554	11.0432996751283	11.8950626690899	11.6716423345328	12.1567977295586	6.89187234312612	11.4896577869211	10.2056124936521	10.7118485083865	11.8958874361654	11.2853231996575	11.8231850282456	10.56933583389	10.8782760051555	10.1313490348684	12.1988306760354	11.4264563339362	11.1385963394705	11.9347465964975	11.831432254924	10.6581409146131	11.8620330303897	12.0621650756226	4.84465168812947	12.4404679569677	11.2512887305159	12.0612706183462	11.8794305906995	11.6637751519454	10.6666513785721	11.9717785028801	6.98312882959198	7.37834942273676	11.2408137841425	11.0249100076271	11.61006366245	11.081291313706	10.4866764446066	11.0780825391973	11.054191405485
A0A0D9QUV7:S249	KANSL1	S249	12.6769134245873	13.1943487403368	12.5373999146919	12.0258267785149	12.5147023330456	12.6665611100873	12.1311315308044	12.7231590145325	12.0012981132659	13.2978041028051	12.8742874269898	12.9376715108498	12.5383502426719	12.3821057650539	12.3289536084387	12.5538927730441	13.1187871021651	12.9632437847497	12.0701825506469	12.3195091251171	12.2999552492218	13.6616225490566	13.2515032430676	13.1281905619462	11.9088852399758	11.817279499569	11.9680330777468	12.9239847438512	12.7812658113473	12.7668490948186	12.1386545834864	11.9922645054685	12.4809803501093	12.2733527799265	12.9915303603042	13.2429202829093	12.4177120482604	12.5707170140414	12.7914077375732	12.4139927329765	12.7403649097272	12.8723623188191	12.1445934928393	12.4662342937647	9.02011079181249	13.0802367193595	13.0616500658897
A0A0D9QUV7:S991	KANSL1	S991	9.34087576584024	10.1711487196187	5.76204284375408	9.36172726906749	11.7239321044	11.3804130106414	7.87447161035929	10.3771925801577	7.99926123818152	5.59797912900133	7.73940888940299	8.17492749799476	9.78872008320787	10.4301476555403	10.3482409208314	9.64996738172003	11.3331703321776	10.7624298628855	7.3204361996865	6.43318814964106	7.6444859828291	7.63920791025266	8.76390640769695	6.74488305643628	9.98660596530836	10.3029523330346	10.5695408840592	7.01812526015779	11.3295269113545	11.4349705626328	9.39500143124381	11.6122805979202	10.3715830110064	7.51491738459348	9.91991642934039	10.0459480775963	5.79040580823712	9.75814058947777	9.29138248709946	9.64224127290717	11.0187999271897	8.41724630351315	8.08685444598375	10.7445537904648	10.4362402734062	8.24365481239186	8.99599605053587
A0A0D9QUX9:S63	ANK2	S63	5.45634177895381	9.16662437543935	10.5933604173517	7.61308745385023	8.38299461724528	11.4492227089211	10.3871536960286	11.790542470171	7.24383606803912	7.41290655323965	8.43211017298468	8.87034567813249	11.5143753365581	8.7664772434309	6.54002875808824	10.0863892600634	10.6547004958742	11.15930450548	8.3745853706483	10.4976067882753	8.28191418555325	10.5597859043836	5.5977154963839	10.5056709633826	10.499311775753	11.2090582425254	8.44824000845402	10.9059108661271	9.42471881757168	7.66878551745993	4.60044931392936	11.5871423266365	10.811317154958	10.8950407045259	11.1690740162137	8.44783074370831	9.30304819974801	12.0385180519209	11.3912101464905	6.62122277520561	10.9567837356142	8.09168056548669	12.1604839922871	9.04552021022573	10.9832100987142	7.99078254169363	11.2084639688738
A0A0D9QUZ4:S1345	RSF1	S1345	14.3226938923419	14.1637410207864	14.2178050065585	14.0201713592559	13.6700938384575	13.7797381906278	13.8179929856002	13.3621855756677	13.6609106947177	14.1526229097886	13.8890501458369	13.8837644571685	14.1839866833545	14.0715040389007	13.7973427849149	14.2540421159851	14.1454151198192	14.2186836848854	13.6194260812813	14.0010646892203	13.8037694912244	14.4534179191366	14.0452938601349	14.0423542937535	13.8114045900307	13.5806194914234	13.6084446648357	14.2276293653444	13.8424550536414	14.1207795114401	14.1274497855408	13.0410012515225	12.9268819294633	13.6142999931532	13.8823030417762	13.8810836442463	13.8853193073596	13.7978438530979	13.8726257743834	14.3989938889971	14.1981030341159	14.3226550722409	13.7912376149679	13.6770457795831	13.9584913898798	14.3198457381795	14.2457479326106
A0A0D9QUZ4:S1359	RSF1	S1359	10.6859889654091	7.20454519536117	10.1654116650007	5.57824445452193	11.0912780828442	11.1039336030525	6.90160141682775	9.15535998293914	8.35330746095405	11.457911342799	7.7010599631467	10.6521441483364	7.95674359293205	10.437885343375	11.1471092075918	11.7077866849314	10.8871223603837	10.6923601181246	10.2520998356992	6.66512889957858	10.626317894104	8.59624073727489	10.534766810598	9.12543696055763	5.45741327223797	9.34394846221736	10.8930109714395	8.42581753613529	11.5126267096322	8.73702203011379	11.4212424845738	10.6649091945526	8.1161132577534	9.6542817481926	10.8969787795606	10.4152008617036	11.7152650977263	8.96847605703076	8.11451656991679	11.2796805492425	6.56530103061053	11.1867098383776	11.4037960755923	8.73080787471606	10.1366842409802	11.6056100784519	11.3836643178604
A0A0D9QUZ4:S1375	RSF1	S1375	10.6859889654091	4.76177459076645	10.1654116650007	8.07911509710444	11.0912780828442	11.1039336030525	8.81522998070816	9.15535998293914	8.89018644064574	11.457911342799	7.44083740928509	10.6521441483364	8.80375895243266	10.437885343375	11.1471092075918	11.7077866849314	10.8871223603837	10.6923601181246	10.2520998356992	7.20560170273638	10.626317894104	9.18386778976265	10.534766810598	8.24380517033565	11.1137124518439	8.12643515590643	10.8930109714395	7.94970305553499	11.5126267096322	8.57003498664459	11.4212424845738	11.6605706380917	8.57992314510529	9.6542817481926	10.8969787795606	10.4152008617036	11.7152650977263	8.96847605703076	6.99511013397667	11.2796805492425	6.66414045832023	11.1867098383776	11.4037960755923	6.8942364944846	10.1366842409802	11.6056100784519	11.3836643178604
A0A0D9QUZ4:S604	RSF1	S604	8.64231536483943	7.20514786757917	8.91185846099675	2.51817148102516	11.5150502003151	11.6167397450046	8.91584344912188	10.594911448446	8.53074934165054	10.1310317877553	10.6733389181109	10.3053669991644	9.29598741706698	10.3530751614636	9.72607316978749	2.64741765775779	10.9824552097491	10.043083013834	9.36772798143918	9.56136880669009	9.42255630978916	8.92981411306724	9.76893863826453	10.6090339945833	10.2121699838601	9.81605681261318	9.17332517110672	9.51171414587529	9.89211208730058	5.93298366477268	8.69953018444216	11.2613667885309	9.81475671846529	9.35244498107938	9.48504324574479	10.6600333115597	9.35006054626743	9.74201763193246	9.48598342882136	9.11025786762973	10.5130033875388	10.3765161447538	8.55663727269434	7.67183732931105	9.63933910445718	9.51440215697487	10.1811139898497
A0A0D9QV00:S666	SUPT5H	S666	9.54003839404151	11.1092086119557	10.9070713211207	10.6099120984285	13.7890888859118	13.2012614729159	7.6299698859643	12.7253196618025	11.1191133571448	10.6718315112645	12.1609687845447	11.7159852804948	10.7811703597429	13.3097340424397	12.6507248078078	10.7990298182498	12.8666955835211	11.7703068921847	11.409859450608	11.7123022249097	6.05562230256488	9.21327666228852	11.2589051368931	9.72678773451058	12.1124752752554	12.3539458650822	12.0651839856476	9.91423608054397	12.0244434864404	11.8524982221934	7.69559537571076	12.6442353361893	12.783173997405	9.90715394982819	10.9104437307371	10.0089381946932	10.4897874084895	12.5220479995409	11.6586598357531	10.7712577384512	13.1283617421677	12.8908736059723	8.4254829467462	11.975833817689	10.6189672989461	10.6151215367458	11.7536979969275
A0A0D9QV01:S203	PAK1	S203	9.88407340594769	10.45023904622	8.31883281075297	6.76310969581836	11.8703077434523	11.3080139110332	8.44771532237799	10.7646934696681	8.64715813993063	4.64154863341223	11.3131533637184	10.9812411579584	9.926562970049	11.1533050642172	10.4849340270036	10.2722217427507	10.9518241773395	6.20802628773286	11.9701134788699	11.0370195589435	10.8885154919284	10.2527645266809	11.3877052330948	10.8251441011298	11.0669212256499	11.6603504176893	11.256632659972	10.2632853649355	10.587464183184	10.7059535451486	10.6883539709673	11.7173810192201	11.8498316734724	10.676635037074	11.0954718080114	11.1966224176057	10.644173837729	11.4316756431042	11.5496412070292	6.85809151467481	10.2742275299583	7.93790805234351	11.0810175678304	10.9317786444992	11.1108893379607	10.0928431483663	9.74227810832397
A0A0D9QV25:S99	TLK2	S99	9.24331422820197	8.95507281906619	7.11097591034022	8.42151293146491	9.29955087423496	9.11435419176915	9.18839610081384	7.38695424165983	8.15964165316321	10.6151185424872	9.43658358251464	9.4331333686993	8.31083497407799	9.86122717816155	9.15413964223853	8.5468160124162	5.93450140115635	8.91908471003692	9.82315635632908	7.90808112105033	4.49353356784304	6.89430188283286	10.1828357044911	8.07090634064317	8.09057878560087	9.32836053654651	10.4157353468837	8.53433051368817	11.42985343824	9.87939953357189	9.36474643266867	10.1888998379654	10.9883246843844	6.73908405008473	7.28280496559174	10.8054804646844	7.60864203633926	10.7014342548696	9.93970079591152	9.61162913899019	7.14907966529171	6.45732213135831	7.93530515494905	10.7642638289273	9.3107462011803	10.9344247770623	10.9226267504574
A0A0D9QV26:S483	FHOD1	S483	10.2054734919363	11.3672095311211	11.2300441155168	10.6678142756726	11.0326774187739	11.607005049889	6.22151973832334	11.0340035587914	10.4404122738991	12.4260474269744	12.0010058386175	12.4406077279803	10.3414930398991	10.4292852847202	8.76606402419237	10.4259270597878	10.9463094545839	10.5237571057966	9.69068253062743	11.0740443585787	10.7134129514719	11.3234017637301	12.1433650653502	12.2346550056982	10.7634233089214	8.8137438009423	10.4048771478776	9.94044371348751	11.9058279239	11.0713866127543	7.97672829635672	10.9084952602134	10.8073212036978	10.8586143070993	12.431904722737	11.9970240642635	8.89591068940661	10.4365163452895	10.2551764147671	7.52731937127415	11.5682687318704	8.19893183788426	8.5325248537977	11.2051016754085	10.5657029376678	11.8005253184758	12.1731850650829
A0A0D9QV26:S508	FHOD1	S508	9.09658777275552	11.1436186469876	11.1274335234012	4.39839121933198	12.7360591586721	12.4406099605169	8.9415343884494	11.5484030054334	11.628014935815	10.9753091466746	11.896599238012	11.4783690853077	9.06954677540054	12.0615923005622	11.9493759145861	10.7307712406752	12.1897367137169	11.9463227783837	10.2442296954116	11.1212787022957	10.8679556224016	10.6891433930985	11.1573465274715	11.4941392320435	11.3375634281859	11.0955597529193	10.1849972637124	8.8101477824431	10.9707617138021	10.9588195911145	8.93187717420271	11.7679655125554	11.4173525544165	8.43668475365912	10.6987276416515	10.5262581380806	7.47851417411069	10.8171983838887	11.3413514330539	10.5188354615829	12.7380830389495	12.0386810194405	9.33084731221666	11.1516633666716	7.82015311956551	10.5264326255248	10.8078919459865
A0A0D9QV26:T480	FHOD1	T480	10.2054734919363	11.3672095311211	11.2300441155168	10.6678142756726	11.0326774187739	11.607005049889	7.65361881643625	11.0340035587914	10.4404122738991	12.4260474269744	12.0010058386175	12.4406077279803	10.3414930398991	10.4292852847202	7.47187713981176	10.4259270597878	10.9463094545839	10.5237571057966	9.69068253062743	11.0740443585787	10.7134129514719	11.3234017637301	12.1433650653502	12.2346550056982	10.7634233089214	8.5619656810947	10.4048771478776	9.94044371348751	11.9058279239	11.0713866127543	7.79972564018174	10.9084952602134	10.8073212036978	10.8586143070993	12.431904722737	11.9970240642635	9.36727766552748	10.4365163452895	10.2551764147671	6.73770063441381	11.5682687318704	7.51504596799641	9.12578213969769	11.2051016754085	10.5657029376678	11.8005253184758	12.1731850650829
A0A0D9QV32:S1904	TANC2	S1904	7.9737039353008	9.00676273763867	7.63611058245638	8.36113074455037	7.7911645806037	8.53683483003393	2.07084011313813	8.30947875064433	8.48168673289865	9.74841226646638	9.42118873982572	8.17980625216051	9.15489366949894	8.92739662503718	7.39217706547598	8.98113550737632	8.37495534656599	9.6000950556209	9.89369863859679	9.97974149612057	8.07717976943018	8.56712969875476	7.40835219048221	9.62264354622077	10.0245766567122	10.0301855431495	7.65728533771826	6.24148674375808	9.50074097073674	9.17742014448429	9.27395680899565	9.77868297145457	8.83090787952024	10.223283999685	9.8364705627616	10.4389384993872	9.55370500894608	8.62898250558238	3.07841432431941	8.81362007480195	8.78144656556375	7.89577182499017	7.92494283351036	9.0745089105086	6.40094471170928	9.96665729992947	10.4164181867801
A0A0D9QV32:S243	TANC2	S243	8.34762062946398	4.16903861546531	12.5295125936538	12.2053483184948	5.3503319235318	11.6332497923761	12.4454091275897	9.0494512285979	8.40595027866759	6.83133539817492	8.91357187320307	9.11012033720728	12.2143348218224	8.1909503814355	8.61256981508183	12.2627251436509	12.094742118448	12.1054272923659	13.4384390101312	12.5302413863485	12.6340745470433	12.3073025921624	12.5664524415729	12.3782088556748	12.6490342422165	12.2535833090249	12.5991466405379	7.78228423235227	9.28458928456744	8.28634235479326	12.8426242097237	5.45332411270422	12.3616107554204	12.1978325553785	11.9295203061663	12.2176306609441	7.39472949295022	12.6775418972511	12.5270633809886	9.27447817490913	9.39797898262441	6.87256103278462	6.22656181967465	7.22441839719634	12.3866762270528	9.12490623292927	8.5095195053405
A0A0D9QV33:S687	SLC6A15	S687	10.8065365557504	12.2865023502657	11.3645894210054	11.9094671732958	12.2835735522924	12.3245526821032	9.19414676851436	12.1801056009739	12.3168388713863	11.0138228760541	12.0925355592898	12.190718379266	11.2954793219527	12.7355536184726	12.1664621055302	11.9004894865214	11.9462605777302	11.6413287172304	11.5446080804895	12.4645161094157	12.0836641107406	10.448293013727	11.14862230469	11.2975821227451	11.995332767061	12.3260746663683	12.2279377546801	9.17331185335317	11.4585581860666	12.1275047445844	10.5797285432536	11.5064891421961	12.0626693108515	11.5689668725206	11.3976446471626	11.0814003675457	5.39298299251534	11.5116026944095	11.9828080279901	11.7552230705189	13.557933022793	13.0114206108114	11.5314334237582	12.2609286998558	12.1472850519256	11.1210567074693	12.2660957910275
A0A0D9QV37:S192	ZFP36	S192	4.91937551251341	5.87790745733126	5.94149436413953	11.4388545990043	12.4379566783545	12.776834748083	9.10583092853607	12.1362408909052	9.05618479008582	12.5678303593	12.7914998146946	12.3968242308078	11.6023944672201	11.8472019126785	11.8154750060733	11.5571703805727	12.7985293775083	12.3317721110189	11.3807027337416	5.79529699147401	6.51098225044486	11.1120158346359	13.112832523412	12.884920045959	11.0899822616565	12.3568757044528	12.234692532303	5.79829560979655	12.638016977381	12.4952357900901	8.22831565391186	8.47039220872254	7.29377877421375	13.3385360669911	13.4293573368114	13.7032151000207	11.1059301878135	12.4446980858662	4.52613596120207	11.6267553621396	12.6624523900974	11.9893212939768	8.35251266002277	8.8780893307241	3.26160191063501	13.0891622715912	13.6811211373632
A0A0D9QV59:S210	EMSY	S210	11.6918661059137	11.3823271223736	11.4181270498416	12.1491408191521	11.8805377605601	7.04639479287217	11.3934513252047	11.7928057778171	11.5746150927632	11.7588153582805	11.2378102392709	11.6638252881718	11.5083188702424	11.3323972900739	11.5105440622654	12.2283037534101	11.8554362419762	12.4250589596027	11.9291553572723	11.5772896784992	11.6571399982952	12.458800073817	12.3673691069035	11.976101985236	11.755816556043	11.1903707851535	11.798290141188	9.4217748986779	11.7586241989835	11.9691464385399	12.1638219658521	10.9361907903378	5.63885570928027	11.8933893466928	12.055908958208	12.2118976455263	12.1766743620504	11.9166679010887	11.9795000507346	11.9154276113211	11.7968416087178	11.8304315252837	11.1733414568835	11.4056791825338	8.33445316586326	12.4139541139507	12.1292437037041
A0A0D9QV80:S361	RIPOR1	S361	11.4177179767319	12.7266972421073	13.1427842412047	11.5584923233039	13.3757657236707	13.4121689262676	9.18503800230058	13.3227192079829	12.5985702953429	12.1579604462983	12.7616818751891	12.5834937349917	12.6851112297461	13.415957261809	13.326418158389	13.4122670102945	13.8149054112622	6.84173372277853	12.9072797083888	13.5034213828952	13.1127125373136	5.2096528707459	13.2605263698694	12.6048286504726	13.674215693546	13.8088180358138	13.6728341341702	13.1585722342896	13.4638480186517	13.2565509724058	12.943899034097	13.7732616573766	13.2520211252254	12.9141125217845	12.8303640817946	13.0479027852111	13.2750702329037	13.6271514579338	13.1180894343313	12.1470326707435	12.3434416972652	12.3141901155234	13.1603359741196	13.4922765836439	13.468997406439	12.8714141883069	13.2819149429194
A0A0D9QV80:T365	RIPOR1	T365	5.36433749423825	8.99819360482271	7.46851852773557	9.21546117840259	10.8921695034768	11.4629647611037	7.69716659020306	10.8906121870262	9.14353754740474	7.63693622154472	10.5980138955008	9.28192264389211	6.90616758556418	11.4183713988029	11.748486508302	12.4499923139268	11.6544688120462	6.62644424882592	6.60673951489501	11.7808970812443	11.298940329525	7.33779335146747	11.2152272979135	8.16881663650359	11.8620602068979	12.0624657700409	12.0229822157037	12.0650983447627	9.48558527525005	8.19964555249187	6.00302995322831	7.68850366464338	8.83919692392013	8.64884422744367	6.9962979325604	8.28240480982891	12.4346074168717	12.0112095650055	4.65971141075996	9.1992623589047	8.90998045395303	3.99257209561042	9.08017131834096	11.0378178011939	11.4374251794132	11.4914935004894	11.9620312600104
A0A0D9QV87:S516	PAK4	S516	8.84389486719213	7.65620567765302	6.75176956952252	5.49815017658061	10.9700254396969	9.7603833056712	7.38543744053789	7.74557017237414	8.22258470909248	8.08740594563889	9.91002634956195	8.12879956378898	7.67999630560533	7.30422868786424	5.92569775152385	8.6897192225867	9.3704182603708	8.72742398900024	7.51802965509674	6.87464529858475	8.24483439442234	8.39806312828675	8.43051984859339	8.66381136488034	9.35109297591015	9.8377442966936	8.82831796801901	8.24625566044205	10.3230299807604	9.13004975409295	2.21045118531088	9.40000652507904	9.86814380108248	5.45287897544585	9.23283506673619	7.55641407208503	9.30238171763983	8.64548032342987	7.08734089802318	8.17370965566951	8.34047225824428	6.13378810649149	7.79597239737167	7.27068803413348	5.27878559492401	8.49645123899931	9.6501513445566
A0A0D9QV93:T221	RPS3	T221	17.2940839796853	18.4212480799655	18.5474064903186	16.4901394640427	18.4059564554052	18.3908885038249	8.04068924033471	18.2046528665964	17.9698958567902	18.876476618747	19.2365877553853	19.1885375885412	17.363706093378	17.9912961555944	17.8673695846943	17.3532020532215	18.3845714494026	18.1765589663898	17.7022546044699	17.7120450572351	17.9481334297781	18.3877945429583	19.0926901553516	19.2943553799955	9.26099677873272	6.50010023652744	17.4430922489716	16.8514834319659	17.9631303142283	17.9318715889868	17.6939920650057	18.3699552894287	18.4630823680678	18.1367999671458	18.4906489882343	18.9649755725498	16.3401760868531	17.8460917145691	17.884490184642	16.6185731805947	17.9712452401197	17.7177985439166	17.0350851543943	7.75831984450168	18.7487837390613	17.3871260029929	17.7592979468156
A0A0D9QV96:S335	FTSJ3	S335	8.80669103424426	8.19597366666598	8.59794866130293	11.8446407439998	11.3996791387496	10.8083058308985	12.1638409646691	7.76543638375795	6.53383591529245	10.919158053095	8.17150370888239	9.22375731627015	11.1172071630347	10.6351996420195	8.42188373479576	11.0969758549333	10.8002855425367	10.4847745405571	10.3100708719909	11.3452488406405	10.4784223675824	10.7317691279709	7.95519832338883	11.0483201840687	11.0560839006353	10.77574214973	8.68087292019331	11.6907248977958	10.6030740411393	10.8901596600548	11.1623724195377	6.95983480923947	10.9400318964298	8.64570813716367	7.22649106255963	10.4654629403649	11.2030544598773	10.6457863671239	8.41227831862692	11.6488209663713	10.985106481866	8.63537884421311	10.6122098237971	10.7391620250224	10.8985903081237	9.1111602632956	10.7766436176838
A0A0D9QV96:S336	FTSJ3	S336	9.17992274624247	8.44260536262735	7.99164917716548	11.8446407439998	11.3996791387496	10.8083058308985	12.1638409646691	8.65590658727066	9.14070834601506	10.919158053095	9.10753580052135	8.76463088135945	11.1172071630347	10.6351996420195	6.81488343876614	11.0969758549333	10.8002855425367	10.4847745405571	10.3100708719909	11.3452488406405	10.4784223675824	10.7317691279709	7.44421164652543	11.0483201840687	11.0560839006353	11.2800906990463	5.84723820803886	11.6907248977958	10.6030740411393	10.8901596600548	11.1623724195377	2.98653624831394	10.9400318964298	7.11444542940635	8.64731949482777	10.4654629403649	11.2030544598773	10.6457863671239	8.32871138184076	11.6488209663713	11.601871218375	8.96987565735876	10.6122098237971	10.7391620250224	10.8985903081237	7.42261099292645	10.7766436176838
A0A0D9QV96:S580	FTSJ3	S580	9.40589939815874	10.3245154447712	7.51155126734805	8.9407151966864	11.3196697520108	10.9146999918956	5.91890104818885	10.8454842432263	9.84493129463162	10.7506993371111	11.2983014480931	11.5562150668026	9.7499734391017	12.042226806838	11.3956151826018	8.36699616639449	9.00850681957946	9.20532903821982	9.58260127993141	9.89837553645127	9.31886759599004	9.24048931894147	10.6593768888122	10.4392955243227	9.01410087583361	8.38141410201258	10.1007492183593	8.1907302476747	9.89028385108756	8.7771715817299	7.35990068381373	10.0891906397622	10.1321180309359	9.37482731511631	6.017962212345	9.58410602662766	8.16128178515331	10.2880629980311	9.91884799593687	7.52461891669019	11.5250198371209	11.3283790408517	9.20176089777906	7.20751890679916	8.32706894243872	8.64443122881063	9.90444131329603
A0A0D9QV96:S684	FTSJ3	S684	10.3200888986954	10.8343295143267	11.0093014807751	8.58308064129201	10.7464629857074	10.8454122777319	8.88281384206151	11.5682821526476	11.141349216403	10.1634881226725	9.96243937748406	9.67232833707978	12.0349407725875	12.2606506855995	12.5990925860612	10.5354933494154	11.1919769392566	11.1789547100108	10.7210771229567	11.6681824713165	11.4344349588012	4.39286045374683	9.2817723688376	4.67200160350606	11.3693110253279	12.8132578263875	12.5283517989297	9.91282939915107	10.5026135059643	10.4794604232154	9.24573731071081	11.5137861652773	10.6655636528933	9.30562798028312	8.36106114636289	9.32904521455956	10.4761210641111	12.7366044659548	12.4496786470003	10.5546599136146	10.9598784442582	10.7869708115611	10.1080972281128	10.963863642642	10.6862863659645	7.43204870584779	5.8170427349733
A0A0D9QVC3:S589	HNRNPL	S589	6.03571710812938	10.2438406644602	8.88718822691852	11.4654856127009	11.2738255253489	11.5338503085779	10.9173979824111	11.4720929546975	11.5574019510771	11.645609613196	11.5226071878282	11.7044594052394	11.4287109602657	11.2456887048881	11.4934916573031	11.469389344938	11.3920537083155	11.5533175586597	11.5617099778132	11.355318462184	10.9511657283124	11.7620239206081	12.0127266244772	11.6869381835312	11.3491122296313	7.30231983937808	8.26486328152236	11.4096566272795	11.2602576154903	9.02858237473664	7.67520075016391	10.9153032564	10.8900584132569	11.7189865068362	11.6588523989284	11.9409140739244	11.2500925167537	11.2363462329448	11.2724055496549	8.65594113719865	9.38614645473954	8.53444865900254	11.0816915591507	10.7827551045675	4.93746182212079	7.48192880233637	11.5228913255147
A0A0D9QVC9:S299	PPP1R12A	S299	10.5518457947979	9.71757283080396	4.49970688924138	9.7806662904218	10.1852904062418	10.5659565052509	10.8452416615834	10.4700093304355	9.97072385526796	10.7072209312056	10.5317444453065	10.7936462812749	10.5717025697111	10.782990624787	8.96162920688164	9.42177360008335	9.10954076128046	10.1837060992153	10.4663599605231	10.5354920144997	9.35602803248505	11.8370154563256	11.6149503592558	11.0483414325018	10.2828183378266	9.87643908937385	10.5270557507493	9.37638702523176	9.66943386540205	9.93116942921709	9.98051167430618	8.73222982648726	8.94807796117427	10.5298083481241	10.6703488380217	9.7843670034198	9.93410310248869	9.84493058229345	10.9059847154135	10.4531422786706	10.5766373349042	10.676146270493	9.7167096623419	9.00906293425903	8.60481253507776	10.8547059931745	12.0006497018345
A0A0D9QVC9:S445	PPP1R12A	S445	4.57906482476814	15.797783423048	15.7451976440864	8.71529568667661	15.5888255607895	15.5621138725345	14.757602835558	5.33997097001953	8.34371546621747	5.77052239997486	15.2913714026367	7.80023217311017	7.57406566282675	15.8293000376839	8.95619678407649	15.5617114492782	9.32820890302068	16.117768285574	15.7494010745009	16.0420114182673	8.22056164591339	15.2893339000561	15.8927603978147	7.67688893872906	15.795525384678	15.6099364210098	15.6103022708797	15.0482927407418	15.6369940434361	16.160988558509	15.535871813102	16.2412335027944	6.6050729467132	8.40823831096401	16.0126366224513	16.1947570071972	15.427172801063	15.8883003531791	7.78584196257006	5.43305329587853	8.68784577651429	15.1405405637221	15.8119425681772	7.57238832862871	16.48317220333	7.2867946012527	15.6553933903558
A0A0D9QVC9:S507	PPP1R12A	S507	10.3938859792207	11.7666122205592	2.63246413655068	5.3167139429848	4.98901147367921	9.31518603773931	9.24641584118372	11.9613660324859	11.5855662638006	9.28943454423301	12.4456391112939	12.2261001296775	8.85372722439206	11.8188411352926	11.87573360285	11.8888375750935	12.5411666458862	12.3762486845815	7.47330567847848	11.4776059431785	11.2459985742355	12.051795111315	6.95368600173923	8.06767956912313	7.75323760524461	8.46117091635131	5.95595085141084	11.7851727359523	12.0810325538825	9.3496018751957	8.19456836672733	7.85167573479909	6.37332260005606	4.45031043602553	12.7046643082698	8.71911762756128	9.50753457349156	7.77058813295964	12.0057717542003	11.1687299265628	11.8952801671279	11.8517758913431	9.04687910140812	7.073751341667	10.0807442675407	6.62840553631752	7.51228379964795
A0A0D9QVD3:S844	EDC4	S844	12.4566802352362	12.3915532641676	12.1538026874344	12.8190817342722	12.3570878642539	12.7494927959294	12.9840925556183	12.1677544451217	12.5439156332405	12.3277333027453	12.465876260992	12.163864764473	13.5873272550989	13.6922238669455	13.8836375742916	13.1413939979083	12.91242622485	13.1996297341328	12.75067340672	12.3721129134484	12.6912594796635	12.4906947960509	12.3511506331161	11.8063441483028	13.2563454343982	13.2997242598763	13.4384310964884	13.1514820093431	12.6807345857523	12.8457869590178	12.2747196946413	11.8494284000068	12.1348657515569	12.3619683362054	11.8294263500989	12.4556927548734	13.1213413045022	13.4827283229574	13.6832742819915	12.9996624150612	12.8531529629995	12.7390473232603	12.8467590615451	12.3022156054505	12.8500393322462	12.5687923223553	12.498779648239
A0A0D9QVD5:S231	PAWR	S231	6.2217500996022	5.88538858607831	8.36883363181991	12.1476369078618	11.1150910452772	11.733164005915	12.0237947582933	10.7476597327206	11.4877971558181	11.94500363509	11.9030862102259	12.086670445752	11.9997041822329	11.5182439959269	11.7215389262741	12.1686664630539	11.5299485049525	7.10201016730764	11.381717904882	11.9334746592862	10.6351322547694	12.7139810173526	12.1530217548772	12.1090875786378	6.24341000562981	11.172403953095	11.3301525488763	12.0598128224013	11.5656156764362	11.6530706978623	8.72640651338058	9.80742072121576	9.94902695937576	8.86773893293717	12.1240309892729	12.412915066976	12.0783092788253	11.1671551156672	12.3483195415801	11.6984096194734	10.9683493196308	10.6217427099859	6.25301470849476	10.8678779863969	12.026509617665	12.5072864387837	12.2004245943139
A0A0D9QVD5:S259	PAWR	S259	10.6091544442101	11.3101066752859	11.2600451386678	11.7133517774258	11.7692015540386	11.6492380737937	10.720016091431	12.966747214951	12.6799943437677	11.6648009145556	11.520706216767	11.4323497096471	12.7916809448615	13.0446173553754	13.1632884344171	11.696768275222	12.6892010417581	12.4784805166993	11.1828099952865	11.715984833447	12.14871608535	10.5173238053343	11.2112634446501	9.35939176715499	12.6233328181983	12.6891040655625	12.7345258434477	12.4418919682129	11.9718018886269	12.1279378607755	10.2424875768077	10.9864904887321	10.6682383827741	10.9527852578762	11.0832252542746	11.3330062176979	12.7337741311857	11.8806698357809	12.5844555518713	12.9210204932354	13.1406173180557	13.1270381035512	11.2389301009107	11.4606194854747	11.9135873276249	11.499197488501	10.9851014236482
A0A0D9QVE7:S138		S138	14.8487060835732	14.7871348752579	14.5646656215769	14.6400521965808	13.6027542963419	14.0236366916919	14.844430686281	14.0657231539758	14.4157078418619	13.8526553979453	13.4459012849887	13.6217571417359	14.4913854431792	13.9215110098781	14.3617784531225	14.4679320797612	14.1333369876258	14.4652559285817	14.2582896861131	14.0874776166035	14.3295311751181	14.460576816027	13.6064504083296	13.7616945454478	14.12408341171	13.8813870128576	13.9918835864634	14.5255986998782	13.398414850456	13.7220781134139	14.7707364637543	13.2857639662839	13.9696903022379	7.06512464804344	13.6423686621833	13.9782385749929	14.4006942935624	14.112883208172	14.5094322430761	14.3954675901841	14.0424748603101	14.2604375889639	14.1580245637196	14.0678702180514	13.6316285940071	14.2513679378402	14.2481301796224
A0A0D9QVH8:S1109	TET2	S1109	8.78368195203669	2.57014653969166	9.11028384920674	8.54201023547814	3.75350704670324	7.96581983531553	9.0763231903882	7.28275993511224	5.2477506051744	7.84590508477771	7.94540357936833	8.04573108923289	9.09105580636472	8.31227209483194	5.3269192024812	5.99951107642363	10.3534271246025	6.55859217932325	8.47984874082145	6.45688730518449	8.38368156762079	7.34909353476208	8.86768569696987	7.22629124210469	10.0154421162765	10.4543548311661	10.4012435067519	4.90991150512363	8.06648231577942	8.10469932704827	5.98113248749855	10.5882358844453	6.7704924140568	7.02570478266076	7.27078552765677	6.95179042984595	9.68350993394125	8.46469296118443	8.88759342458263	8.16742816505898	8.6586891953001	9.10959391291148	9.31546912414238	7.5199008088891	7.80845977668202	7.4707405934681	7.96401981027761
A0A0D9QVH8:S75	TET2	S75	7.30458203424473	10.871493077918	3.1414524797976	9.7011028271235	11.0683939182499	11.235308553452	9.43363825304294	11.4953735953533	10.6897483228567	10.0172916222171	10.3539876720717	10.6026637497345	9.67102386517982	11.2029941402102	10.6778855858934	9.70546120107377	10.9352089776058	10.1591311614071	7.39304308955688	9.39616142492518	10.5847133085084	9.89618823047197	9.97844615347714	7.6332764043822	10.762752432959	11.0493804313159	11.2076492213723	10.6389840932661	10.7198158382217	10.8238454618885	9.90146038323692	10.4997126359803	10.3094058596395	9.38036426718812	11.2847825882435	10.4486236427056	10.0934612332075	10.9794890776332	7.79165148774583	9.67412121257445	10.9435981316862	10.7020521336721	9.5637163570298	10.9684924810039	10.8813161299437	10.0365365022151	10.8384702618408
A0A0D9QVI1:S175	PGM2L1	S175	7.71228236449016	6.99520759657933	8.72098673488764	7.6341893822157	9.13490228994158	9.13903317874646	7.87731960699447	7.53150876877058	8.14578160461335	8.10609968258493	7.99948551628404	8.56150708601336	9.13422583345329	7.9435617245625	5.99907568806185	7.80354731661637	6.53103444933178	8.83671045369987	8.86555765780234	7.6781060333555	9.31037761194606	7.19592404950454	8.13056466049068	5.80953721746544	8.97175854569495	8.76354606522849	9.21525996200296	9.11871896639572	8.18455158386556	9.02505417701956	5.07205305370621	8.59648678127526	7.8389584148772	7.97879797637937	8.5212299372584	6.20773039780422	9.13854083770796	9.27501231577305	7.43070905320032	7.28132842297969	8.94451550350452	7.87922035506035	8.87678857437561	4.92942545397619	8.96203449280003	8.70644801216411	8.45735438282096
A0A0D9QVI7:S967	SLC12A4	S967	11.0434734633962	12.1585042362344	11.1079558156969	9.43285705107668	7.32034187285982	7.65803236899215	6.63325731272954	9.69595800283861	6.36642292571696	10.5854000610982	10.4331841351962	10.7798387845673	10.5580961766452	9.28385235137571	8.57970388307898	5.815099426593	9.61573243962092	8.85932360177632	7.55297312739813	7.94100925364654	11.1820287097567	9.82526557094617	6.68635928116333	9.8436065677158	7.82978123650994	8.54310846371943	8.83226037392737	9.30393523437825	10.5429222742656	6.78316986710985	6.90443076418452	10.7722303643186	8.98774899885585	8.37905575369463	10.1448573407733	6.51835616449407	9.42610814267328	4.20482109487275	9.65708462326101	10.6266793766172	10.1342667264896	8.6418672358129	9.06811975232608	8.90508122884647	10.6065372980103	9.02565546193086	8.14498387486572
A0A0D9QVJ2:S350	OSBPL8	S350	10.5384228681918	10.4571129105656	7.22084867953194	10.8879311497422	9.24081287027995	10.1162470940925	10.4454676883595	10.2081264882098	9.6006333683641	8.73474521020776	10.4865220905559	10.358672549233	10.2392618149469	10.9136355763325	10.863274990044	10.5937363905913	10.1409920312799	10.4926461465441	9.8366230429746	11.8349587918327	10.5075229226139	6.66110215215703	7.37348697707593	6.19329271317577	10.6539581852086	11.3872210871601	10.9620142498079	11.3568374914184	10.4652362948866	11.4684116571503	10.3511976110567	10.0336965916721	9.48367093664774	9.08684487795552	6.49341697472993	8.91324573389091	11.1278762521979	10.2195800041153	10.7480558712714	11.1700606187981	12.02721957568	11.8413796181813	10.623465565006	10.5065012459199	9.8636269331713	10.0365365022151	10.4612690173788
A0A0D9QVJ3:S196	PPME1	S196	8.52093083010543	7.31484486275985	7.65249136082556	8.4131815026872	8.31327016113915	7.3504031101533	7.79523572644842	10.8011683972008	11.6000573134684	8.95671363283573	11.0443224016388	11.4566132409449	10.5610128832227	8.16330491629562	6.97315792561023	6.81186774102746	9.27260993300232	9.13736553051854	11.4340237334474	9.14581707571355	11.1143104356609	11.4659155880654	11.5611625199053	10.981632567958	6.80159327577972	8.9751205721509	6.66019244577902	9.00345615792286	6.63181709923216	5.40288531559793	8.17768112626237	8.74668902762858	7.37901736432287	10.3391603927862	6.8164742257036	7.41658434298761	7.36594134707191	6.43879430323261	9.0864537000191	8.06431937987103	6.85069295061168	9.05049568633109	9.32322994739858	8.90713948883088	5.92048916067771	10.7156960901992	10.6603618918305
A0A0D9QVJ5:S2140	C2CD3	S2140	6.49738602666539	11.9423242855895	8.39984921986188	8.13316539229854	12.0860957695233	7.24789170674129	8.28920977293505	5.43652342123633	12.4126293823051	9.10465131982601	10.7211653365224	6.22995078189522	7.51646460945399	8.35298952683885	12.4359898403173	10.760031275887	7.27416468965991	8.14369047075252	7.93120775428033	11.9179097354473	8.83377001008578	6.74827645314156	7.28719352467784	6.61948081699995	9.09527370148541	8.90614572263453	12.4837880144555	11.6366637610224	8.8506282761408	6.72899372541061	4.42179428476444	7.42840237491345	12.8222254504318	4.40384381661349	11.9451096479474	6.39510032330618	9.41406360108251	7.46883118385085	12.4099867959567	10.8425978118325	8.05935969275798	8.0215634562234	12.4128501831721	12.2891899989912	7.78200422002184	7.55742202699642	11.5477619432738
A0A0D9QVJ5:T2011	C2CD3	T2011	8.09457561418567	10.6670575750816	10.0819820860273	8.72546795651191	10.2848022327062	10.3915456982389	7.29497526716005	8.84559357924553	9.07350550173606	8.63937839170639	10.3855358264936	10.4447877996367	9.1715439981328	10.384616449355	7.73255212663954	9.44584816771583	8.91058398696965	7.62144464671291	10.8451396772054	8.92067035126896	10.6207570634542	10.1527844362837	9.27387453179678	9.31358636649222	4.21907478731999	7.28607500837668	10.7953949711271	9.7677819615198	10.8150358436492	10.4152692349875	9.4127386257376	11.2236233256854	10.5636739002344	7.46886040820603	10.3845834059093	10.3088565725992	9.0043243821762	11.0557023875001	10.7652265020969	3.52988311666042	7.03624727314399	8.59190571064216	10.5875368338774	11.0058446550121	9.08459287404296	9.3319716274859	8.20268578002009
A0A0D9QVJ7:S449	CEP95	S449	7.29530362094663	9.64069713975232	6.34277711513252	10.0269714433255	7.85085025131747	9.10893097632866	8.23026897504156	9.08253722126316	9.11566415310219	8.74443024334398	8.45649841737178	5.01720192188563	7.53241863597721	7.33438245757497	9.59656120302781	9.18739955279145	7.55761398207232	9.67481646927886	9.62473778367904	9.8773205988758	9.71868548553014	6.7491553537879	8.1663826983648	9.10627969994945	8.93894148958343	8.04244584367677	7.62754518861581	9.1601770609159	8.15148613110154	8.69391773828048	9.99227388742839	9.23543589882343	9.91511284494181	8.77833154791845	9.04460416071309	4.78128084751263	9.03246790137558	7.10555956130941	9.02285895584617	8.23130043584328	8.68876447619289	6.00121991030195	7.41796418907018	8.7166105111449	2.59656880274364	9.34759354850535	9.54134459535099
A0A0D9QVJ7:S451	CEP95	S451	8.30097279829409	9.64069713975232	8.62034110846897	10.0269714433255	9.38810515113911	8.91581892459623	6.29711790804232	8.55041839095785	7.95322567462829	6.72721106905135	9.12976893183417	9.03740452730984	9.13587404519626	8.1534010088822	9.59656120302781	5.94524032993964	8.44558152904931	9.67481646927886	9.62473778367904	9.8773205988758	9.71868548553014	3.31867678103865	8.1663826983648	6.19647819770752	9.29400781330649	8.64472799706617	6.12072024446946	6.90023767368491	8.89781814736498	7.77109013316204	9.99227388742839	5.12709309001612	9.91511284494181	6.96793760810198	9.04460416071309	8.94790405522787	5.43382006931877	9.29591362951883	9.02285895584617	8.40919391058331	8.68876447619289	8.1671720595115	7.02518592835715	4.95015754383599	7.3844576985606	9.34759354850535	9.54134459535099
A0A0D9QVP3:S738	ARHGEF17	S738	7.80694208995902	11.7174606185598	6.27777517317622	8.95108451740065	13.5941912271312	13.3380021308251	8.46439408556845	9.21350180156352	7.92295588618874	11.3996322189222	12.2389807938859	12.0775465032836	11.4174356874811	9.12802601514128	12.0241881696148	7.10392259496132	12.3978018758568	12.4662833430884	11.5621573997308	11.9633243840228	8.46283967111919	7.03419819409914	12.7616713648966	12.2895023327648	11.2391896528213	6.83198003917693	12.1299763360137	8.94563319435608	13.0758529348995	12.9716188855564	11.2716238414331	13.1950050848408	12.7383437761529	12.6034933188279	12.9272715810982	12.8323030326028	9.38093745928214	12.4238681152878	12.2565258597766	11.1766563235473	9.14611327283956	10.9267235328477	12.1911565593394	9.35426207618827	6.87109176399625	7.18642287567573	12.1206473465179
A0A0D9QVP5:S16	SLC7A6OS	S16	10.2425947093674	8.41385128721782	10.5397434157877	8.8634285203784	11.5711077124322	10.9219693036762	9.2507226932441	11.0250433875138	11.4072780508422	13.1876616548478	13.3989686100962	13.1373516541191	5.71667215412434	10.1091372766069	10.8208808716568	9.46523439020848	11.2377921473382	10.4345028595243	10.3175563876406	10.304205931539	10.0882493970803	12.778056464392	13.2308030773497	13.4290609630251	9.98311865874197	10.4129706819829	10.5103296396711	7.36564260630031	11.126155974417	11.3223296517689	10.0480253846312	11.3991552098042	11.783185006132	11.8289680683347	12.6025955194219	12.8993466901707	9.00654213686441	10.1096373839408	10.2204736713851	8.3866615370465	10.5088034039995	8.59739257057571	10.3518835469612	11.1400531992541	10.1156991302153	11.562593988233	11.3282055336756
A0A0D9QVP5:S302	SLC7A6OS	S302	13.2898571603483	12.4779474972915	12.8896526890905	13.3330852050987	11.8088765734425	12.549145522191	13.7241584128153	12.3938812949926	12.5650803831448	12.6537740480407	11.6132798976464	12.0247607434276	13.3126308109892	12.1790618704095	12.4931828164503	13.2855358258664	12.5750502402432	12.8708143117874	12.8397696782224	12.9491559771706	12.8432823452381	13.568402506009	12.1776685839079	12.8075107536977	12.7586288406351	12.40744015428	12.4031181457769	13.4395173590097	11.8542147288518	12.169550847802	13.3923798839394	11.8753667768442	12.3860148777528	12.4307879157391	12.3697512988437	12.6817446806561	13.3977201830075	12.4921134109069	13.0312640977968	13.6073757726337	12.3127564336103	12.9267175481381	12.8986548902515	11.9552362597462	13.0960808974306	13.1467960290978	12.5571555607631
A0A0D9QVP5:S308	SLC7A6OS	S308	13.9306668975981	13.21564001949	13.4904249871913	13.4501460101901	12.2769196320716	13.0118460353414	14.0087216655017	12.8078772295408	13.0187093633449	13.4273595580044	12.5125596861814	12.9893900240752	13.6564711797891	12.4726048938843	12.4931828164503	13.2855358258664	13.1860656520685	13.168429122811	13.5116277035555	12.9491559771706	13.3803252585572	13.9096627396777	13.0677599427352	13.4660078873229	13.1325368812347	12.8686269203041	12.7755335457147	13.6233617266448	12.5303182902004	12.7110824266153	13.9181387379428	12.697552897201	13.1042407371268	13.1570340805205	12.9623532013884	13.2773698856275	13.5622917421089	12.8594184237254	13.3434187564287	13.7532914864393	12.6344804126516	13.3006892601334	13.6063251067269	12.751515431849	13.6963222093221	13.4000384715302	13.1385374656744
A0A0D9QVP6:S675	TBC1D15	S675	15.3293628164092	14.9987232119033	7.04533947459243	14.5389736043329	4.9004362613547	14.225316336436	5.96617466650643	8.37561845345851	8.38334054378383	15.154250741001	6.9763029447464	14.9801338602932	15.3371728031895	14.5295965708512	8.64038315342625	14.7111849436401	8.52788440708326	14.5285389708534	14.7632737708234	9.08049127849792	9.13227566704723	15.2526677717395	14.7948370737566	14.7418506658166	14.7009258013832	9.4778830091884	9.24220709660632	14.8440007827566	14.1217321836475	7.34802871715593	15.080339525144	7.22608183372998	14.1441435379882	14.3174073845199	9.14057890591774	14.2358509030577	14.9768234489798	7.31590939792881	14.8660055922329	14.9254490568274	14.4814228962027	9.21967036615206	14.9960511473312	7.66607277377914	14.8702546471223	14.8102891562193	14.7343668308398
A0A0D9QVR5:S557	TANGO6	S557	13.5300786421002	12.9948023332723	12.9924793636547	13.1560490658045	12.3602465722881	12.7461917699	13.4065467602443	12.5830627520569	12.4398488330706	12.5315766321075	12.5937818776609	12.762953550302	13.2395832422676	12.2819278932721	12.8623448574821	13.5960730673897	12.9525141020489	12.9813193020231	12.8441617085128	13.3293111695428	13.0949100362502	13.4280040315015	12.8431122854204	13.2131770701371	12.8939240752388	12.8897720009369	12.755244848066	13.57998475395	12.350964640075	13.1381033696363	12.7831766462153	12.2845827402759	12.4751798396199	12.2686017998411	12.7618266056576	12.8526198848597	13.6027725743382	12.9006833647594	13.0979015002412	13.8001148241968	12.6681864541345	12.6074836964359	13.3427357295752	12.7661612598842	13.0626633046625	13.3790013005757	12.971435584814
A0A0D9QVR7:S714	ZFC3H1	S714	9.0111872738967	5.50081253719097	10.615059375711	11.1171100656496	9.48080164859218	8.38991694887947	9.99459040380078	8.78372893084055	9.21527253265865	6.69517401594475	4.4964598119273	9.67841072646565	10.125370402934	9.51303325992023	9.88744026005812	10.0496742423194	8.37599054122757	9.23529571866716	6.13810074651599	9.14149056960365	7.73514695642069	10.0696648439142	9.16940729436704	6.96275779329958	9.50355851567203	8.42895411488813	8.35223842652127	11.1272326582464	8.87792271931341	7.10749414656259	9.45138334505785	8.39564099540505	7.1744393132404	8.46027328542483	7.52954831402345	9.39904277750233	9.69707071738378	9.63975620649865	9.02811600237425	10.9512363614469	11.079726483604	10.9940533964869	9.66508821751414	9.15193712672465	9.32516421609628	8.23126864725561	9.42697903354334
A0A0D9QVR7:S717	ZFC3H1	S717	5.07594000872466	7.85486255452837	10.615059375711	11.1171100656496	9.48080164859218	7.17803292506089	9.99459040380078	8.78372893084055	9.21527253265865	6.95281299278804	8.35083729328444	9.67841072646565	10.125370402934	9.51303325992023	9.88744026005812	10.0496742423194	7.60591825744361	8.90453035998899	9.42576648298869	7.28075644163164	5.6709997967227	10.0696648439142	8.49550476303834	7.51752039614003	9.50355851567203	8.56315150551327	9.12154850294571	11.1272326582464	9.41709760791806	9.0152701417383	9.45138334505785	5.97950724430186	8.82586514638919	6.34900574696255	6.2231606859651	9.39904277750233	9.69707071738378	9.63975620649865	9.02811600237425	10.9512363614469	11.079726483604	10.9940533964869	9.66508821751414	7.26214704752387	9.32516421609628	7.39424133232512	9.40996565506547
A0A0D9QVR7:S719	ZFC3H1	S719	0.766923585276567	5.73752202127053	10.615059375711	11.1171100656496	9.48080164859218	8.27164480569122	9.99459040380078	8.78372893084055	9.21527253265865	6.48022199802145	9.02940352429206	9.67841072646565	10.125370402934	9.51303325992023	9.88744026005812	10.0496742423194	8.12901489613134	8.71595089238403	8.24287643104397	9.40285617539188	6.52231278325274	10.0696648439142	9.24477352421327	4.72395286259645	9.50355851567203	8.68195798966619	8.32045771056881	11.1272326582464	8.4324125270559	7.04662281652638	9.45138334505785	9.14655748241594	9.05661317524019	6.82570247248576	8.30313873735733	9.39904277750233	9.69707071738378	9.63975620649865	9.02811600237425	10.9512363614469	11.079726483604	10.9940533964869	9.66508821751414	5.2456978785591	9.32516421609628	8.3819140012323	6.09521817741295
A0A0D9QVR7:S949	ZFC3H1	S949	1.02852801670183	8.92987392533243	8.86805556664647	5.38364181555096	10.6987971187504	11.0814988322343	6.98600980098939	10.6367524550217	10.7685624701372	8.52023647832702	7.79513870232594	8.86151736747829	10.2836155149104	11.2064676399203	11.9825603992437	9.79688695070297	7.98883139175108	10.7794270069756	8.6306019858556	10.4750614510992	6.32277844598314	7.46258882276782	8.32669217318287	7.18099815082699	12.2793353847514	7.27823565178613	11.8958874361654	12.1981616978254	11.8265499803208	11.2882018857226	9.1897912643137	10.0394602510322	10.7083606013908	6.93191065070323	11.0097708516145	11.2334667872127	8.74546610600228	10.959765022673	11.1570377264687	8.38259392586057	11.7635152776527	10.3269309482309	11.4582891449366	9.61644253511023	10.7046157981246	8.50148872189611	10.2092017248554
A0A0D9QVV3:S1615	HELZ	S1615	9.29003261789118	4.72200024275918	10.5603086187775	11.5420585774968	10.5152948917168	11.25578247785	11.0441203549097	10.4624134262073	6.74046602076914	10.0795306288089	9.8842803771054	9.15675559008571	11.7277183850756	10.854296640612	8.76201298758292	11.8151989851057	9.11447500940243	10.1566516735576	11.4098494998276	11.2417347954221	10.4324045367767	11.0875335858363	11.4305142446303	9.79563048833945	11.1569759457954	10.3841444775439	11.4633324623214	11.3563501922441	8.03033985073935	11.0303677758982	11.882573185736	9.95899533425577	10.7474303814727	11.7287140747353	11.8285959550662	11.0476382648748	12.3804509372682	11.171068512303	11.150556432482	11.9974330166217	9.0426715494932	7.38848058462833	12.6393124716618	11.2483889721255	7.616148961367	11.6268061615941	11.0798446708751
A0A0D9QVW2:S1362		S1362	12.1795088580655	13.0225704447297	12.1205229369215	12.0437321816792	13.0949124071522	13.0505801345226	12.5751069101418	13.1717940627236	13.1431751501608	12.0906040912285	12.3983146501028	12.3641522196334	13.2332837144223	13.2673999293861	13.3823945209712	12.6743047370892	13.1183319681318	13.2270745490376	13.1793505027662	13.1694416864027	12.7812490463905	11.6261164823159	12.449538783985	12.4507575683273	13.3621178568316	13.1933151307122	13.3721056986307	12.4842499573632	12.9231521580481	12.8441533115204	12.5519321295973	13.0137107684885	12.9211219531855	11.9231557602809	12.3850420989984	12.7314291020011	12.9038014938387	13.1957650405812	13.2304052270896	12.4299150406611	12.064100147348	12.3889946736635	13.0564033098895	12.9816060739944	13.375134585465	12.3357513151255	12.4075586841373
A0A0D9QVW2:S290		S290	7.68855971376433	10.6655291041462	10.0870106054347	7.9517444958804	9.29899206908471	8.71832877250932	8.55508703117648	10.7531093566378	9.95441479460426	10.5953606279892	11.160202914838	10.950217083284	6.58605165327206	10.3365890968994	7.15996561127856	5.72216492051752	4.75710632269992	8.60513471547773	9.96364252944551	7.8178991812937	9.93016598345879	6.88498125752558	11.1751028917947	10.9094142006411	8.67804897384134	10.4849900613042	8.77164396833912	7.11873055295457	9.43890300616531	5.38410409497226	10.9092517073807	11.4777154227131	11.3040643808526	10.2036532848253	11.1320794363337	10.9314886890767	10.3233329882019	4.11873689844496	9.13042379659098	8.90361059480158	9.08894294202559	8.43038548882344	10.3675917555757	10.5482953766463	10.3679423572802	10.2224447076295	10.5249103403448
A0A0D9QVW3:S320	TERF2	S320	10.8985303394033	11.8241637778669	11.6061921094832	7.70355231500936	9.29010261817058	9.22045487360792	11.9128376687411	12.0208055686129	6.27501818038626	8.94701091868209	7.81909105311312	8.55182375864048	8.73357193379517	12.4585714940354	4.78435519000478	11.1435484002971	8.7226011698312	4.79789342895068	7.56299756070853	5.36130047346336	12.2072107311379	7.91040927106477	10.6665834006197	7.13549486375327	12.6992398032229	6.48147915344166	9.35195787433336	11.1532102324712	11.4471507448917	7.57658760878093	6.18090755547435	11.9798223488648	12.4935181747062	9.81223475860907	9.0862895265889	10.3672955274474	7.8124053649325	8.27863135145294	7.92161601767386	8.87769829145188	9.02076412061576	8.15543002600238	12.3088976060027	12.2000326055835	12.2093343492738	8.79569416414077	6.06354930884718
A0A0D9QVW3:S323	TERF2	S323	10.8985303394033	14.3201256287901	14.4653808355603	8.22215536415453	13.6031542767658	13.6075316574461	11.9128376687411	13.7971232415343	13.5730752648942	10.9263056006835	11.795322461667	12.1292807009316	3.84741558233322	13.8729041738697	13.3087594325762	13.101017123732	13.3460049301435	12.5505742083708	12.5902151693349	13.5575408851104	13.6637082511744	5.59974199620549	10.6665834006197	12.0998810023897	14.1194864967994	14.0184062844472	13.618210427906	12.8781582524575	13.5847781982574	12.9255964829184	9.32974840920599	15.7664040028419	15.3836373430055	11.9503517022183	12.4401350071673	12.7643906003466	11.7434942021517	13.0535610896119	12.8877338895167	12.7316681932654	13.7521967763396	12.9089069213193	12.3088976060027	14.7252118734138	14.3962553538291	11.9419209582206	11.7990251071598
A0A0D9QVZ5:S165	CNOT2	S165	10.4286064716663	10.0905187075536	10.7880422349545	12.1320971537848	11.5044449679727	11.6003724795939	11.6743407051825	11.0655374995064	10.958796732914	6.4813104440554	11.0064569649876	10.0977696352824	12.2248498531748	12.5334244679638	12.4025060673115	11.7725640208467	8.37993511122474	10.9944097487641	10.3595858645231	10.8787301784053	10.6548123354489	10.5758095633277	10.2317678030373	10.1763751130328	12.4132395342762	11.1522322194013	11.817700229298	11.3219185967003	10.6115987313997	10.2979159598517	9.99619901210889	8.93878634859932	8.59964205863804	10.3546525471497	7.27728323049166	8.37887531890958	12.0176404115723	10.7503432141496	11.6942894212482	11.2753481409473	12.116876837853	12.2951212926965	9.99578381231555	10.8545970460451	9.29676047077899	11.0906626157601	11.4724826282206
A0A0D9QW04:S53	SMARCAD1	S53	0.827070503208395	4.58754132138797	9.48874842070594	10.4062953673188	9.30778376529557	8.95931341207704	9.38281111133515	8.14739497530442	7.48908555070623	10.5499342304124	8.72507803744211	8.01264490201971	9.64921821732033	8.30635020410027	9.00189513255492	10.0366874143692	6.38662200419669	10.1491750066768	7.7483665215221	8.98295922450432	9.21276534469538	10.4000108924347	9.60567792469099	10.0122703394222	6.94335880109788	7.25738554649702	8.56301428508702	10.517386986849	9.50041132085456	7.52541550156747	7.05550364844024	7.76645728821685	6.9185537177597	9.47268708250585	9.60821062335711	9.56605451808147	7.56598116579678	7.92935705950646	5.99546213377565	9.56438363738767	8.31775775872495	10.0930411407913	7.13449482750795	7.91077716379667	9.22059501311144	10.2980643592328	9.65949714669914
A0A0D9QW06:S247	RAB3IP	S247	7.21535122465917	5.55449010721594	8.76875851865891	6.45425121361872	8.91928206750721	8.74563492584038	14.0008875672456	7.69853250812681	8.68944409709459	13.8353632904595	9.44542380481314	8.87955105111375	12.711573994004	9.14175925059898	8.65102345748351	8.34723844265041	8.60088117226141	7.52909261451679	6.97341195324587	7.5906141509369	14.1796884027374	6.33926529410179	8.09208024393878	9.13380203599638	8.15278289783161	8.61788766628774	6.36373913945944	9.39702497208496	9.07431889525079	8.20392803476384	6.21890186815588	8.83805844533454	7.66762339701569	7.38553118089745	13.730077790427	13.6988977276808	5.99754604677257	8.6095557768132	12.454239776313	7.33226554520093	8.66379830367213	11.7321271869739	14.3359527773795	8.08712416413623	13.5119056171794	13.3947943556726	14.0104494614951
A0A0D9QW06:S250	RAB3IP	S250	7.37398415751968	6.45650005925697	5.14952955432888	9.0897403504698	13.4985774161074	12.9518626762207	14.2574525986212	15.2198425237518	14.9886787256996	13.8353632904595	4.44661085344443	13.7220908090306	12.711573994004	9.06060257053201	11.5661680249183	6.61614196160581	12.8609054634792	12.5249570072156	14.4495821494895	8.33345373796278	15.237287698399	13.2823942187948	14.5583498555748	14.3256953742524	9.16933601628211	7.05749112906581	8.72308052478171	8.36960427510137	13.4126049613431	8.94320644443402	9.37907846145824	15.8376588722383	15.3042572814659	13.2455950398181	15.0987316722475	14.9255327730264	7.34412758521187	12.8458904513168	12.454239776313	9.38418553092307	9.08933411921555	11.7321271869739	15.0888036408486	14.79664660111	15.5329770769407	13.9974153009928	14.509721350081
A0A0D9QW07:S1958	BPTF	S1958	8.14803118846483	8.33423986046963	7.09634010046333	6.30800967972276	10.3053238400184	8.33366714738191	5.51472439745253	7.99150608809275	8.79514494264312	8.15987111096602	9.63010377403685	8.91055484290476	10.1054515910664	9.96685748048849	10.4367364101412	9.73422614492961	9.29978343836446	6.43880607612217	8.12995090771414	6.65533709945917	8.99602143716665	8.38248131366471	9.99016203033426	8.64341227695822	10.4731930679779	10.5489272939874	10.9668647243123	7.63688299914362	10.0650795751172	9.98106792275378	8.7619583297453	6.44480778954481	5.05457136210121	6.21661863018612	9.76731687213698	7.66696553742528	10.2159209262519	10.657085511352	10.6056057977564	9.39461967686295	7.62663684667024	8.71029064225961	10.2826232604758	8.91507989134252	8.24886750434734	8.8685026021437	6.34117816332951
A0A0D9QW15:S62	KPNA2	S62	13.5157007593659	13.5874258490517	13.8744772593707	7.05126305884897	12.3252026724771	8.12197149885905	13.6277995598504	14.0107488057076	13.523107223311	12.7698464413748	12.6261353979558	12.7967080784451	14.21353384679	14.54136985345	13.9836132786341	12.8499607592061	13.0496640443944	12.9363418099525	14.7480592236635	13.9417485506975	13.7357508367914	12.1124862982862	13.3144243352917	13.1016537829536	13.9909148360454	14.6244062026623	14.4810913468878	12.8697366417867	9.20970116401592	13.1311755279419	14.3588586469035	13.9552939246625	13.2235646031074	7.6413245839092	12.5765273240484	9.09002132737009	13.9530145657252	14.8260105543424	14.5593412720867	12.7020219748286	13.2882726300528	13.1094903584287	15.0364429635798	13.9545990674128	14.4896494419241	12.2024447158284	12.6076022928094
A0A0D9QW17:S169	NUMA1	S169	12.3738073328151	13.947624423841	13.8530262792046	11.964313119613	14.6045640884344	14.1474473202454	8.76304693085951	14.6319005842883	14.3407445961935	13.7424623704371	11.7482119172146	13.9854823425117	13.636268148779	14.4329146723461	14.1227695665541	7.69076571626542	13.6261239485801	13.9750139262579	13.6748364938823	13.0613653435597	13.5047001973169	5.6986915226794	14.2167406843264	13.8756149438646	13.418448022827	14.4629599599	14.2690943199215	12.8487838899865	14.249592284863	14.3965817999601	13.5255654343268	14.5764029796265	14.5595802239019	13.5593387401109	14.0992687204408	13.8589292158813	9.28023083240224	14.105097798604	12.0433870112483	9.21562892667151	13.606282036311	13.3653000402318	13.4682927372801	11.807440108525	9.19156965825583	12.9829615064326	13.2279544409405
A0A0D9QW17:S1757	NUMA1	S1757	14.6567789582396	13.8114605544394	7.1699931783714	14.3614932438818	9.40433538603474	12.0179867413754	6.99265900503566	15.0354957051378	7.30589550331782	14.8312502242537	14.7584699488325	8.80204071516334	14.7132939610808	8.28869538619508	15.2770677868268	8.45486105921858	4.86294012088748	13.2054535141063	14.8164800389308	6.45602910789415	13.2407118231909	12.8959525984545	8.85586554489428	15.3892357977842	8.99661350630927	7.56780160427931	6.43627580221873	8.14230545942437	14.7293646799697	7.42861867558971	15.3700929707381	12.0603877520697	14.5780064773245	8.77953335316496	8.96789975502632	8.75862066183192	9.15069887296861	11.1533691340546	7.59436619246627	12.2509142641335	7.03575946095018	13.1959308319598	7.41828633644766	8.09788052775834	5.55032809699719	15.1168169727139	8.78021650722944
A0A0D9QW17:T2000	NUMA1	T2000	8.70999573965688	6.31481588965303	8.6658023088175	8.26937765364	9.17604875928066	9.97813430080186	9.11641643490063	9.67465526638424	9.78906698856951	6.14820739541149	7.79458269178491	8.83871425747993	9.25377833544119	10.6485606273713	10.1716415211684	8.61366638547351	9.31975527845747	9.97996954074032	8.43651983129353	6.49552321579225	10.1674367823052	8.35549007471587	8.91206891376541	8.24519696220938	10.3527762979185	9.76237531792117	6.84256762909464	9.46293396691817	8.0199462083911	10.19303168148	7.73309235237038	10.1919905553324	9.82274245491399	9.32655419401961	7.70199465454702	7.80572739652061	9.43945010430449	9.59242918169762	10.523660571035	7.11619275370436	9.90796751873358	9.16417284636018	7.51235967951003	9.5868275782973	8.72169155965444	3.81995329235074	9.03402125321104
A0A0D9QW51:S1006	NUP98	S1006	12.0164843769044	11.225987556535	10.8509988745169	12.4410041039937	12.3240539633685	7.88044684474281	7.77940725300613	12.1895147541953	8.68597938701143	11.6354420411488	11.344998421054	5.87023360423683	12.7416295075645	12.7578887968391	13.1140311427067	8.03057121770815	12.1929324290729	13.1253784625077	12.5838542535244	11.8916030410285	12.0409279670082	7.75577328588658	11.3954455596988	8.74195267789008	12.372787138693	11.9816416537663	12.2203761330509	12.3849210926356	11.7421291554404	12.3667126235164	8.63500048198516	7.05400467750135	11.5316805620346	10.735297406391	11.4429713138649	11.2720746805184	12.8616040300221	11.8515245176866	12.5163755528144	12.394464089482	11.0276637779904	6.55222839923705	12.3757834493066	11.6159267407167	12.0524077598376	12.2000915146062	12.3134836233485
A0A0D9QW51:S1011	NUP98	S1011	12.4142940018733	11.5069785850719	11.4181377912941	12.7159718928852	12.5191644419141	12.5692490645013	12.1429263792824	11.2561749644492	11.7338018461424	12.4339179500253	12.4100379127052	12.3341733212627	12.5680781419343	12.8386964221245	13.1009265866621	12.7551490965044	12.6614923419507	13.1294710794994	11.4673877855437	11.1080440232343	12.0169239371892	12.7585956959067	12.3979359698177	12.4887383537739	12.4046992653553	11.7201518057994	11.8156077114955	12.5810160167552	12.3625118666078	12.6667512551053	11.6149265905257	10.6991601415683	10.7407057235338	12.2586781452611	12.4543069646881	12.385265067898	12.4194733659584	12.2474578938733	12.5202431868304	12.7175898430627	11.9477900790028	12.652204554026	11.471350632088	11.201812942666	11.6215854974464	12.4814836144811	13.0850591860997
A0A0D9QW51:S1043	NUP98	S1043	10.4836467702121	10.0729999810863	10.3647856170113	8.80823806261876	12.2234332234292	12.297856388455	9.73639761460329	12.1297573866675	11.5892189448252	11.8458988241293	12.5449609791769	12.2640484987247	10.9335457649827	12.1314096864258	11.7148412190237	10.9606177873057	11.53409757219	11.4869384122301	9.19672790540699	11.8286000570131	10.4918434729992	10.8080143051245	12.6006354609308	12.1941300431087	11.0274665623169	12.4456336093604	11.8753466550023	10.6490193014286	12.4801139848584	12.0958864241911	7.76787717246798	12.6926533258876	12.1021854292528	11.8409863000204	12.4064021229505	12.4204421919188	10.5782139322735	11.4942929753817	10.6608284529823	6.30129505437649	11.4647556456012	10.5765502032985	11.2186472249775	11.4351002729978	11.3172121932065	11.1969849831192	11.455025917209
A0A0D9QW51:S591	NUP98	S591	12.129873276278	10.5044752192852	11.1066198268666	11.1501876583308	9.03002160934265	13.4926600478039	11.0702381765602	10.6291654886091	13.8462602637617	10.4169062918697	11.083861027077	13.7395581169397	12.2671085765595	11.8487878649449	12.1398130849069	10.9467752400699	10.4707072212088	12.6566311684058	13.8242055472028	10.9350214075297	13.4665014904822	12.3269950346316	13.9965758952473	11.0059169411141	12.9395168781558	13.511568466631	13.3565974728759	11.4305447748123	13.8193655797626	13.0320906352594	11.9123716563978	10.4211891126122	10.6113869009789	8.77586811259205	13.8304469843785	10.9569653293917	13.6111868090218	14.2417310225878	12.1369424390065	11.144707941845	13.1836298251995	12.4155734336269	11.3109677389799	11.4102531846183	3.61652633834781	11.6127001987046	12.8738804849943
A0A0D9QW51:S595	NUP98	S595	13.0502669303049	13.9133474578717	13.9664939371076	13.0662085502226	14.4590093436191	14.1619989852289	12.781743944537	14.085654530106	14.1090699171584	14.1118781104048	14.6338189649419	14.3873171462692	13.4928179244956	13.8846899276594	13.8263386219337	13.3821369801439	13.8909583491344	13.5515735259258	13.243301954752	13.6752799444459	12.8080503812854	13.1708841756813	14.4851453393014	14.4031294751535	12.9613490837687	13.5451271193457	13.1934221971534	13.2955728320016	14.2735775068121	13.9233231110536	13.3868542914993	13.852335885087	13.7193694677936	13.6627265958133	14.1270463818636	14.4241578856503	13.3027229070477	13.6423062786286	13.5066920524322	12.2055966103902	13.3876036975803	13.2046217140918	12.995712176968	13.5544574694198	13.0920468359079	13.9583262306597	13.7905133526399
A0A0D9QW51:S606	NUP98	S606	17.1843565484543	8.5506201023388	16.6102813207522	13.3653524321595	15.6868831244773	15.9708953690283	16.9483078286204	15.9400787133508	16.3462476507828	16.3212201043622	15.640547515593	15.8931337224838	16.724777025986	15.5208179694134	16.0362668330527	17.0990573229206	16.5122734512442	16.7015072471263	16.6203375833158	16.526980573197	16.6908181405039	17.2913441165409	16.3066674915205	16.5401835572701	16.2933940503089	15.8319004234207	16.0182836090224	16.8879332432793	15.9305679945992	16.2355135361847	9.13400094776888	15.0566982130972	15.7335054328765	16.5873065116076	16.1247325333704	13.0637957094773	16.7182938172237	16.0600585417108	16.6051472710571	16.9138194150052	15.9122760647509	16.2789801285066	16.8654534230092	16.3648701281004	15.9642965450568	16.9970899781634	16.5146416115582
A0A0D9QW51:S871	NUP98	S871	12.3956933295767	12.1782425550753	12.4023690193792	13.0460772626041	12.349460669693	12.2025829084107	13.4267547628908	11.6123536555922	12.2551605961904	11.9718414632961	11.8528198205052	12.2964557709933	12.9573002031148	12.5113337243923	12.5420272457999	13.2001186186323	12.5479573784093	12.6482939315338	12.5941209436597	12.4631326641339	12.7597171539927	12.8647413848082	11.9431508467837	12.4910826963589	12.7904295696385	12.0653006814748	12.4894135328265	12.9619714902998	12.2021124457994	12.1561402846858	12.6544046986427	11.2171097534018	11.5963388913127	11.7415625322383	12.2591332539623	12.4685180761075	13.0295788139638	12.3079684261762	12.9442355406185	12.8064313328031	11.1611424162875	12.092465370555	12.4621776579807	11.9151300673366	9.40387269252781	12.6758162592143	12.2897838301207
A0A0D9QW51:T529	NUP98	T529	5.23658995201108	8.3522485954528	7.11731876569114	6.82669989634386	8.56526421892918	7.49396400926716	8.23794416231311	6.30170555952843	9.27683668432216	11.4413147564348	12.2243254627876	11.7620904548183	8.86661366333952	5.80129871723006	8.81855813397696	6.00803431275165	8.32122924424543	8.07628208804446	7.05519824526655	8.73457080147111	7.73442513804383	9.14784431262714	8.52268319856783	11.8477157938865	6.47359535268431	7.74189278937014	9.37810685970673	6.7446422363718	8.04042281122275	8.93910409372787	8.57078314464508	8.90754911612931	7.95195931330032	8.35431630596119	12.3612709026103	12.2235174352733	6.13608954396891	8.72991452952171	8.42417534967185	8.31962773196225	7.99516124968939	9.10880101844758	7.63392435878223	6.86326966785182	8.13209475899044	8.64978076341402	10.8938308248986
A0A0D9QW57:S83	PRKAR1A	S83	11.7809694518002	12.8266371079732	12.6982302703403	10.7627647207416	13.0878051312678	13.0586758798854	4.66439274936884	12.4820247984955	12.1647728226166	11.7743669962842	12.3474115181388	12.0557769861865	11.8748176184093	12.1236444802113	12.3393504516188	11.5144835904728	12.6671286598551	12.6136096101201	11.9586440449007	11.9082664862701	12.4533161736855	11.6568746613335	12.3079749908464	11.9290561415074	11.9619705490937	12.1359287260127	12.0807536262049	11.2116883267667	12.8052182920112	12.8655014390461	12.0845909317261	13.3812309570508	13.1175851648988	11.7678673508872	12.1170845391232	12.3070660761486	10.9091958651527	12.3605611630633	12.3598125482987	11.1654343622146	12.1603814075986	12.009364889304	11.4525226303711	12.3652830589618	11.6286978666753	11.8926813528648	11.7581150035217
A0A0D9QW59:S166	MDM2	S166	2.50711285110203	11.1567800422409	10.7224687806665	7.02936711665673	5.87196518637587	8.28804903707018	4.52355074639423	7.15400172588067	11.1107947694787	9.05295910802752	9.08270742847774	3.41850559410932	11.8109576471533	11.0100213799752	11.0309000049442	11.4016200011639	10.5844648797454	10.9727616176123	8.30718099383859	7.53800027903396	11.0747839585062	10.006808842822	8.79509690376343	5.82658673069205	11.7168745055313	10.8471660082197	11.4326953431302	11.4844787734477	9.45093021530382	11.0355226641483	10.3802326115211	10.3060127959149	8.53199401630613	8.87360529075831	6.81439091002813	10.9759185026513	12.0780105805346	11.3014264538655	11.8541647483665	11.499594384289	6.87424663965935	11.3517382234845	10.5875368338774	11.2972046770804	8.64760395399817	7.26877871399843	10.8700756069499
A0A0D9QW68:S11	NUP107	S11	8.29439086321764	8.27071552491136	5.92290532326796	11.099491404058	12.9904408171316	12.7663855907296	4.51198938530403	9.15984059415785	11.426979230552	11.9806848088572	4.98487129948719	12.2574511185068	12.4055354405829	13.0371636307377	13.3372023522603	11.5165599017993	12.5540441003331	12.307474130857	11.7319736271485	11.1804240946951	11.7782815802346	11.3002841236384	12.166832593809	12.0798417179902	12.1374331247676	13.1886771937197	12.8362970258628	7.57377240130921	12.4892733694804	8.38351840851337	11.5051473391961	12.813731867849	6.26422800547991	7.73687589233537	12.1365035763095	12.1520228253288	11.0126039831826	12.9934968808856	12.9526664216132	11.2391999586632	12.2569874420175	11.1785098309185	11.787231159302	7.01851590735849	0.712856503151151	3.60477791472614	10.8750748754748
A0A0D9QW68:T46	NUP107	T46	8.6011462509379	7.55535187669801	6.09989347483853	6.73931112734696	8.04563051425404	9.08732359538737	8.79671530750705	6.6508204505022	7.66775616791188	8.39534163367937	7.29276052163629	8.16628471789857	9.12554536632909	10.5356152250497	10.4730500172488	6.09471987054934	8.49140688003557	6.99803302072028	7.76339604646903	9.39925512473789	8.43663653148365	8.87103185717193	9.26347000956546	7.11192756934463	7.29975851738603	9.97962689709882	10.5002146318473	7.61794084596279	10.2388963566028	6.01824127233525	6.81726444949024	8.88569518919127	6.96769919899425	5.60429797789217	8.56497939652475	7.82593437296776	8.9822506118	8.40228190614334	10.8479729712241	5.72068492526193	9.06581583101286	8.90714154114623	8.09798396346895	8.84022411604222	6.36826701605558	5.76205407990049	8.21974942062781
A0A0D9QW76:S33	WDR62	S33	11.7171683484027	12.2489323190824	7.84653615581664	12.1290335462791	13.1901968579651	13.0550048852061	6.74320407415727	12.5987144895613	12.9841037034029	6.81049839142809	12.9569081044888	13.2193151026679	13.0793150458848	6.45640888010039	12.9637903867137	7.16367412796345	13.1166573484622	13.0368856531141	12.7262632687392	12.7919183571075	12.7685665835837	9.30002686316671	13.529517871074	13.1923330083514	7.51600340587356	12.9620215785739	13.0234458835618	12.4229754355764	8.4446197835917	12.9881438085149	12.2699853104603	6.48863332815008	8.99831584969343	9.06234682762485	13.1186425783268	8.45603410547411	9.37133314272483	12.8188467045947	12.8463480079325	7.22488923971156	8.08764216283463	6.87736436233792	12.618285861549	12.7316612692967	8.12923691635423	12.9206175709066	13.1120983074725
A0A0D9QWB5:S219	SPP1	S219	10.4140963352687	11.0922616544016	10.8602266019174	7.37950829135612	12.5219879693849	11.3774690997573	5.73322912693982	11.5381504658381	10.9689466697522	11.8183138291411	9.36100097555162	7.71720078631581	6.36026951451812	11.9485484782175	8.39512979727394	12.2614804439909	12.1006094535253	8.04728365929904	10.0915991750189	8.26186731688685	3.33446143171864	8.9633715873309	11.6878304076767	10.624317505885	8.62485174913832	11.7654066118802	11.9328119558293	8.80631607083185	12.736931435039	12.4025113462078	9.25268910444366	5.51052218712948	12.1913790525813	9.13177121762759	7.27059490763266	11.0460801448579	11.212472255328	11.5020095693629	10.7698654474765	8.74805433827843	7.3379596007121	7.39475962824365	8.58639883143809	11.9058691852657	11.1790458224246	12.1329548739149	11.1059981728189
A0A0D9QWB5:S275	SPP1	S275	8.1213869292173	8.77402515709092	8.27004697629657	13.5727722272992	11.6265666301308	12.5199336698723	12.2290234401578	8.80711712305779	11.5586376599722	11.9059855114615	9.94834310131293	11.0827972822257	13.2525006997476	12.4605982560661	12.6979617637113	12.2526841626525	9.64170271871398	11.7338309406472	12.4942922114447	12.303282844458	11.1933613843822	11.8038899192947	10.4143128711978	10.630917083243	14.2425356484698	12.0689143229988	12.885154551822	12.4763764532175	11.6997508018085	11.3455924374734	12.211129002645	6.30797987619867	11.4501440995592	12.2634775423142	9.87315305208157	9.6850100421008	12.9493492925225	11.3825963856504	11.2821469221824	12.9496304168998	13.1934353363084	13.3979623910342	11.9273197964084	6.859013415996	9.30876165097245	12.1535174852259	12.553496010006
A0A0D9QWB5:S280	SPP1	S280	5.59392303453058	8.77402515709092	9.17871654681319	13.5727722272992	11.6265666301308	12.5199336698723	12.2290234401578	8.94250040608406	11.5586376599722	11.9059855114615	9.94834310131293	11.0827972822257	13.2525006997476	12.4605982560661	12.6979617637113	12.2526841626525	9.64170271871398	11.7338309406472	12.4942922114447	12.303282844458	11.1933613843822	11.8038899192947	10.4143128711978	10.630917083243	14.2425356484698	12.0689143229988	12.885154551822	12.4763764532175	11.6997508018085	11.3455924374734	12.211129002645	9.16983636231139	11.4501440995592	12.2634775423142	9.87315305208157	9.6850100421008	12.6169822780485	11.3825963856504	11.2821469221824	12.9496304168998	13.1934353363084	13.3979623910342	11.9273197964084	8.90413119146028	3.34228454394861	12.1535174852259	12.553496010006
A0A0D9QWE5:S1011	PTPN13	S1011	11.398533909634	10.8793412165903	11.140311114851	11.3192467251467	11.2831092777022	11.4492262419442	11.4022597424288	10.9336416058646	11.2402421332438	11.3347780855658	8.22962043287746	11.1377184071463	8.00384058728121	10.6914427744288	10.9573562000526	11.7808311195821	11.8179515856628	11.6082091917722	11.4148063443177	10.8278490068782	11.3253856657606	10.6052185848845	10.8569043594989	11.2020534096077	10.9896977218893	11.1719053780127	8.08321822271758	11.2780720819619	10.9869624838289	11.4557545922958	11.3022670703722	10.8649316304988	11.1878877264169	10.9945983735103	11.2423486337297	11.3423876540436	11.4538343029424	7.17447296734612	11.3892135411859	11.7635967744296	11.5828991895396	11.9328868134757	10.6739533266684	10.8318839588225	7.98113044448972	11.2834910879255	11.5295004986156
A0A0D9QWE5:S1015	PTPN13	S1015	5.89317417860117	8.01684589563167	10.3814869995459	8.95636538656526	7.64821843605768	6.50136081099458	8.53535690589877	7.79149752931169	8.21584438260007	8.66415325143597	8.85954734857062	7.07303901450055	7.87251061446119	10.5186909334608	8.19174934767775	3.67008872504225	6.62631734395971	7.16503374001343	9.17941170889062	10.7231428103487	10.561733807597	9.17977100247227	7.34502462110968	7.80628587639728	10.3455559006815	11.3817590817811	11.2601451947673	8.02267515746234	10.8340698963032	8.65346310954281	10.4351933892886	9.23633078676996	7.63166113406987	5.13424174667355	11.2703663140851	8.33319573556561	4.6386981471337	11.3754493789443	7.64282073560607	8.18184081863413	6.87289416558546	9.12313154462313	8.36823281926693	8.90750569646356	5.80735834721876	6.96347198344982	11.4818371171587
A0A0D9QWE5:S891	PTPN13	S891	13.3290187087029	12.7931340661497	13.1774127961167	13.3327300579307	12.686648421298	12.8359290832557	13.0049909965785	12.7097745806508	13.3112973640517	13.2364352723082	12.355298599861	13.0828320654581	13.276546566377	12.6235325861063	13.342229806413	13.1417276422761	13.3268210478435	13.3681043906077	13.2142195195847	13.1139403320856	12.901372076161	13.0472289253335	12.7847586726642	12.8263064182715	12.6607316398761	13.0765221226788	12.9468869196807	12.8622942819112	12.2269804789185	12.6617277636352	13.2894699710151	13.3676731514382	12.6461429192579	13.0342292004153	12.2558724267897	12.5333319799043	12.8332052787842	13.3312735403293	13.3247501102652	13.0806858747584	13.4807067767662	13.3041954623422	12.7912565184991	12.9752075757801	13.2659841748944	13.6259114838182	13.3064601288216
A0A0D9QWE5:S898	PTPN13	S898	12.4788734643887	7.72349804951924	11.638244054807	12.033570342164	8.78925388633507	10.8746156844075	11.7985780641152	8.92937880320737	11.3386910976515	11.2631401059406	7.43811187169031	11.4796514202079	8.84340034715043	10.4566227821361	11.3279252348392	11.2637842368329	11.899791635239	11.4121254613289	11.3963525839344	11.6950858389088	7.83153885510949	11.8257449984373	3.96917416172653	5.9516499821326	10.8461256940364	11.505399443647	11.3077060538176	11.5826636456556	8.68920455383343	6.1013688456797	11.1185466976043	12.0546073020518	7.63495688863554	7.80756625347479	9.02763433152549	9.03497516074232	11.5622352698158	11.7107255768462	11.7687855009515	11.8310405747581	11.7586379738483	11.3960325095296	8.70067494290477	8.78494775105802	10.9821267950851	11.9394023687032	11.6570709238294
A0A0D9QWE5:S909	PTPN13	S909	13.4697067426843	6.9033447685704	8.96714870109001	13.1638027785001	13.8180751539642	13.8478219792375	13.1911909810047	7.36192161512415	13.8903194739337	13.7459888404488	14.1245820945311	13.8616269933976	12.1420327672099	11.3929114532945	12.1360439179484	13.4441206431757	14.0362829602314	13.5435603106993	12.6511005985825	12.641454130135	13.8449379169752	13.3292091164153	13.286741463804	13.4359090289902	12.0003571591779	12.0486575057305	11.934238791976	12.0681843954116	6.63772710234618	13.5295142692362	11.760753302764	8.30377054543414	13.7385481908297	13.476076884756	8.42311187766043	12.3322883294805	13.4585959692116	13.4441800796597	11.9973004773398	12.3151793192323	13.0248901238632	12.817401623103	13.8152782976085	7.93099605159054	12.4497020378857	13.6166540054465	12.8375265001859
A0A0D9QWE5:S912	PTPN13	S912	12.3184616284159	8.19157139050589	5.63006589419028	12.6851703316655	11.50547417215	11.788458002137	13.1911909810047	6.88168163001032	12.2701557458462	12.0046294140637	12.5603086013325	12.5351653050437	12.1420327672099	7.08923478113022	12.1360439179484	12.2365946616737	11.7017108834979	11.7305211854689	12.6511005985825	8.07614253739148	12.5485662335149	12.4629069957594	12.2642249766609	7.17771353325407	12.0003571591779	12.0486575057305	11.934238791976	8.36721509890261	8.83082386139461	9.15789741539909	7.52912870417216	8.89969807133123	8.6769988793697	12.3366849998002	7.37747153671233	12.3322883294805	12.8832336943498	12.3882824121429	11.9973004773398	8.70012137166917	8.74872429460426	8.73523532730535	12.5459311878798	5.89220255278796	12.4497020378857	12.7501380738075	12.8375265001859
A0A0D9QWE5:S939	PTPN13	S939	8.64528009984182	5.84669536229653	4.57374549288935	4.2717059101657	13.6177982955432	6.91532731041804	7.86296495031553	7.80297861377357	4.7654020534502	9.19392727737318	13.8076571520526	13.0662687226688	9.173827432117	8.85681658528328	12.3711533790626	8.69789374560034	6.75303825957179	12.5993643036997	9.30297806294786	13.5208522008661	8.56133206126975	7.07798910683148	13.7204798156401	12.9710820924807	13.1555409786745	9.02970901227211	9.08752279690567	12.6748935921087	11.8064922615442	9.36862426696324	13.1163370805056	12.5049258647288	13.1240549881624	6.10267580278946	6.87988350240217	7.85827939705788	9.08805756887623	13.0349519680922	7.45424434789144	12.9367939227629	8.13793561554071	12.6511207893669	7.98029365001783	6.14635587756461	9.1456839467645	13.8871369161006	8.52533091053226
A0A0D9QWE8:S138	LIN37	S138	3.4030277768289	11.7812068561705	9.03791952526184	6.59574329993927	9.14093109916715	11.7812365187846	9.06841013528266	9.32862467602376	12.1996662214673	3.25191021548374	11.4551283180958	7.14895500088785	6.39707656550345	12.5361304232791	12.2401167486682	6.19616771051918	7.88068795425271	12.6163016332504	7.17805868041834	8.03147645199222	7.87739357007907	9.09912577977319	7.01882847638566	8.61507810633432	12.433647926332	7.49723680738824	12.3875229498726	8.5881719591428	7.21368016321524	8.23955016699909	12.8050522379439	8.62155240256424	3.24091720649309	4.82823888339433	11.898520109776	7.97222782382244	12.179373905216	12.6891500805047	12.7275889136854	12.7404311527091	8.12495193586307	9.38126254772768	8.15176442982477	12.3138810336552	7.71708924857891	9.31977317890573	7.55454934884413
A0A0D9QWF2:S104	RRP8	S104	8.21418812323579	6.43173059633122	9.26994223857558	10.702505813195	8.32543800749959	9.11800429151385	6.72052639929087	9.18633067735787	7.04960807696989	8.36748570188486	8.25800922272258	5.30625779023201	9.6140286132565	8.94646487557177	6.30529144073363	10.7245150133689	7.25434859638749	9.43577925463561	7.14537437193093	8.3899797217898	9.20736002847068	10.7269895452286	8.89820881023922	9.33666278971523	9.70371740389753	8.23193428351038	9.39027348664879	10.2031503629889	8.76000866185625	10.3121480949153	10.2021443405547	8.23461761991347	7.15185422932056	9.00532741881434	6.93839394977009	9.79725081241114	10.3965955584866	7.94472583141018	9.79012109285948	11.229710940018	9.43552494742469	9.55685037584065	9.58303867303321	9.20756095068972	8.58656205925582	10.0087550367216	3.745852515972
A0A0D9QWF2:S106	RRP8	S106	6.96766298913251	3.51846942032672	7.9645024342954	10.702505813195	8.32543800749959	9.35259497138316	5.7690642307095	9.06376996112975	7.4920601917057	8.36748570188486	8.25800922272258	5.48322972415825	9.6140286132565	8.97841433970871	8.15451001077017	10.7245150133689	3.50317087973014	9.43577925463561	5.53657086608496	8.72575407486708	9.20736002847068	10.7269895452286	8.89820881023922	9.33666278971523	9.70371740389753	7.2205796587582	7.99452856696427	10.2031503629889	8.76000866185625	10.3121480949153	10.2021443405547	8.31477061609838	8.20107715133185	9.00532741881434	8.84004149634222	9.79725081241114	10.3965955584866	8.67292908891162	9.79012109285948	11.229710940018	8.03406345484863	9.55685037584065	9.58303867303321	7.39991412157577	9.30951456895895	10.0087550367216	9.32738292623152
A0A0D9QWH1:S1021	HELB	S1021	7.32870297107072	7.85822267615601	4.04536881679028	5.05034050475132	9.401993024377	6.99329342782091	7.98433696186902	9.0736775638616	8.43710034024928	6.77314300079464	8.45370525800924	8.04449149202453	9.06103609890716	6.65715252931644	8.62856708844902	7.61577531122863	9.13018068581672	7.58150981308447	9.03915575150087	8.4196999604759	6.70555395051994	8.67073133257439	7.32104918000586	7.42989819775808	8.4056460824034	8.85963207652796	8.39123338678296	8.51283418994766	9.35771084695692	8.34896925919214	9.39563489035113	9.37444380084477	7.95018201597555	8.11146905074892	6.62393359546338	4.98249236221791	7.56195065787637	7.82704821530272	9.14982175956187	0.0651575686972219	7.7243933578957	3.56051440397024	9.36614568199564	9.02384240489052	9.78697043088959	8.74557378473067	8.41925489288095
A0A0D9QWH1:S967	HELB	S967	11.3194239954579	11.0496313948136	9.27762836051159	10.6647135647833	12.1289704368819	12.2235472336983	7.94570893611464	12.5728829975802	12.4705768870553	11.4688387054557	11.6085685478841	11.5494062569286	12.0604065760103	12.1894912523114	11.920529863668	11.6875204136265	12.4005786872728	12.0401947667072	11.8138450833421	11.616812365933	11.8693699638098	10.8224283550454	11.8295627692087	11.7162835376021	11.7300866559136	12.5342791639143	12.46553935804	11.146746728874	12.4233495765686	12.3871830226031	11.1560627962803	12.4419431498763	12.210330762998	11.5117620712322	11.790138239518	11.8020103093593	8.31146999573042	12.1180002468396	12.6853100973459	11.2290757047629	12.0816877045905	10.5182872301417	7.08615324131975	12.0188106577347	6.71064755110898	7.72895763845279	11.0034575150621
A0A0D9QWI9:S163	KMT2B	S163	10.2966566735198	8.25136619574758	8.58948223592868	10.6903347191318	9.33265431805876	9.9471045808625	7.03564799997255	9.11148468895283	8.50916701058568	9.20122799938715	7.87271921047102	8.99721030966137	9.22605497214051	9.23631374137535	9.84334618655147	10.3764781390433	9.27301889280844	10.4827974213878	10.1951379146302	7.87287432002382	9.05706924321136	8.50036873804818	7.90908521037744	4.51767796658897	10.2818648128902	10.7032135998404	10.1061683106313	8.17208951283706	9.8023539281593	9.97505269555278	5.27619504244464	5.64574115405974	6.11870697606251	8.40888909284657	8.68029359118371	8.04721292370717	7.56154355512958	9.97780781715589	7.70570849751624	10.4367647592457	8.0693198792296	9.70774842959347	8.06411306045343	8.42987102742224	9.57493225592547	8.77091715491662	8.04090178490495
A0A0D9QWK7:S140	LEMD3	S140	5.99084299548265	10.1100188579871	10.3199696469349	10.3852102189435	7.45926746387009	9.29186587054763	11.2063038306511	9.99808539765656	10.3733538801897	9.89230160499804	6.78742191502309	7.35756176026226	10.1332512619529	9.10500243676375	8.58043972145463	10.3592396978243	8.26739522214554	7.57167976823815	10.8772548204154	10.4199655799055	10.4449963854263	8.33954892897559	9.2564113715125	8.85567307952994	10.5985294989848	10.2893000323084	10.3071499599519	10.7401495222131	10.8159409259125	9.2998630880971	10.783909528003	10.2781283434697	10.4112799351296	8.55208974225564	9.06805723216296	6.8781279285454	10.4780981425302	10.4132710234131	10.1849201314981	10.4831883393227	4.96070548299543	10.485298214517	11.9193586648775	11.4289301515404	9.72865100258986	10.7709704918962	10.6115347827543
A0A0D9QWK7:S141	LEMD3	S141	6.0930431864298	10.1100188579871	10.3199696469349	10.3852102189435	6.84628228992063	9.29186587054763	11.2063038306511	9.99808539765656	10.3733538801897	9.89230160499804	8.19971042249193	8.86405575841692	10.1332512619529	1.29353768521639	8.58043972145463	10.3592396978243	7.94380454509401	4.41383315320059	10.8772548204154	10.4199655799055	10.4449963854263	5.44294332293728	8.04591737311384	9.07679836979232	10.5985294989848	10.2893000323084	10.3071499599519	10.7401495222131	10.8159409259125	7.82710378776258	10.783909528003	10.2781283434697	10.4112799351296	7.33937436719702	8.6922026527244	8.28711404793875	10.4780981425302	10.4132710234131	10.1849201314981	10.4831883393227	7.59275713260931	10.485298214517	11.9193586648775	11.4289301515404	9.72865100258986	10.7709704918962	10.6115347827543
A0A0D9QWK7:S144	LEMD3	S144	9.23462475107348	11.6351238643943	10.3199696469349	11.0285591937985	10.6926818335696	10.871432773831	11.2063038306511	10.9972127802016	10.9401946539564	9.89230160499804	9.09115846458239	11.0978650685106	10.1332512619529	9.65741088542061	10.2563138875627	11.0674465684107	9.54406304689514	4.647587333158	10.8772548204154	10.4199655799055	11.2173388324802	7.96770885108308	9.79846222275404	6.01228722069581	10.5985294989848	11.6907588385656	11.8904962372878	11.6182131890553	10.8159409259125	11.4890677157792	10.783909528003	10.2781283434697	10.4112799351296	6.83311738559923	6.92714276656517	5.48661920472592	10.4780981425302	11.5664216370086	11.0639859886541	11.4019988265615	12.1300482709003	10.485298214517	11.9193586648775	11.6341329137444	9.72865100258986	11.5888819066539	12.1429480505351
A0A0D9QWP1:S1857	MKI67	S1857	9.78319609359587	11.6359051378695	11.2166771072359	10.1785910451013	8.66166759079554	7.32076629437448	9.39367392459614	10.5229279994684	7.70411629025204	8.53431228321908	11.1711322138718	11.085605751665	10.1488593859844	10.4421828718399	10.3579955217107	6.5487648701842	8.27459699870201	7.6136739569389	7.45562867150015	10.6833956272815	10.9923997337873	9.37144827384501	10.4596724176068	8.69202304085664	10.1039133681164	10.027944594765	10.2061339100245	7.7753054473055	11.6344831722494	11.6717190881634	9.69200510251357	10.8200070692949	10.448842481316	4.44955511572185	8.84168212857314	9.33936474673937	7.55530239864894	10.3938602504674	10.6691261520591	6.72214751223394	12.0239092265076	11.8366417846721	10.1134378294117	10.6235820244382	4.63027443659518	9.18218705911072	10.6719998234168
A0A0D9QWP1:S356	MKI67	S356	8.52200715494701	8.42434342820455	8.69676056157508	6.72159929510797	5.20389034135315	8.12266755175753	9.50665118298849	7.49501733345503	8.99478854282615	7.01923623512979	8.15341844028678	7.33702556373012	9.14011717451802	8.21647540270523	8.43007475461035	8.54611477841914	9.29274184470227	8.20494473186077	9.16935115302335	7.8233850680317	8.27169024765059	8.95858595452655	8.89484264336428	6.92591071703924	8.81710155604842	7.67233496052795	7.96333249296049	8.3833477714774	8.20508766892281	8.2151025912587	8.48974794736585	9.07866898205596	7.59588003899759	7.27851401766562	8.50287210876011	8.93103849076557	8.34158450524606	7.9953379526228	6.75311185865163	8.70618988288754	8.54884223173545	6.21179385035846	8.52175191904301	8.02452337228682	8.20480200276787	8.8603585479525	8.79456394084846
A0A0D9QWP1:S647	MKI67	S647	10.7722090038669	10.5965357024192	11.0801912100071	11.2911590042145	10.1914836135584	10.4289471757616	10.697240176333	9.94442956740339	10.6538353992799	10.5873796576831	10.7674435216172	10.6521137763144	12.2118286774076	12.9715066621498	12.8035598807469	11.4720956187329	11.4156480160961	11.3635975309921	11.3832342451019	11.5423918732621	11.2755574011515	6.83414337684893	9.75646026667474	6.50122011395045	12.2697097376681	13.2573499384041	12.8365457159458	11.6557359972668	11.4531475749062	11.9135277897352	11.1120594073054	11.7584705558578	11.6065320027905	9.67897218429809	10.0965303811654	9.88795108770709	11.9080294986123	13.3506991922735	13.3103130257743	11.2747264095314	13.0406173226326	12.204151468965	11.2210908019571	10.9576584879773	10.7368057138201	10.3227266295865	11.3836411927318
A0A0D9QWP1:T1314	MKI67	T1314	9.91210491973444	6.26720098872663	7.7567319328539	7.94406899189057	7.50252781863647	9.24009699230978	4.70797962853972	7.44562834754748	6.41519151373375	9.13045200994178	4.74505364240728	7.34744530165657	9.57408313838129	12.2282960348451	11.3388945362285	10.1691560028114	11.1422470164783	10.0971062427331	7.37930532665638	10.4954959473259	9.19390189192737	6.28911608127978	9.76396071090816	7.54820566103256	6.29162076332738	12.2141232964669	12.1554914531683	8.24609317808455	11.0746814696206	10.7903062038667	6.23309135625002	6.54672165471552	10.9451456581835	8.7256434011072	8.68920871691562	7.97643790322818	6.8185875820491	12.0898931565392	11.9102181292423	6.97647805660974	11.6710624654157	11.5013192374069	8.47885077801095	7.51440665334466	5.7169443937655	8.93212271711719	6.16362832803327
A0A0D9QWP1:T1838	MKI67	T1838	8.42405907121893	8.38184861677938	8.10121731329012	5.69683038809547	8.55782223134651	11.1441514054978	8.20343544880163	5.34870775919729	9.27068715458506	7.10581573457813	7.18753928136871	9.01558630069734	10.7811703597429	11.7549930154338	11.7607619814768	7.71302587386473	9.00190823235678	8.40906567390314	6.62749684449021	5.27985799415993	10.952978407926	7.59167683783418	7.21758262271945	8.52609913957663	11.7398488105536	12.5261198779332	12.0662715159159	10.7315379389634	11.8748657813883	11.875525363374	8.52609464067897	11.8989926830269	8.54548874846803	7.26941376994304	11.2774140307129	6.73359162228747	10.5552247735731	12.2301607959854	12.1710040065472	10.8124794961201	11.6931291092158	11.6496247391754	6.71777078049404	7.00769301822135	7.73015783705582	8.82766258254511	7.93554346524723
A0A0D9QWP1:T1919	MKI67	T1919	8.53178167034445	8.03667341193154	8.08019228824986	9.01983564139129	7.79814826497435	7.30531118374852	6.74403534093788	8.59254861878483	8.91904153373345	7.48016331832907	8.79656255521607	6.87201178262641	7.99099593345854	12.1607394995091	11.7356911821528	8.49169810342628	7.38687308880498	10.9797687735121	9.06341180054047	7.24017226822116	8.02060927162544	6.55047357301295	7.62311340389148	9.03264794452301	11.2492221760136	12.4781803197398	12.02229551111	9.45771563364306	10.9481667090465	8.93365742153951	8.34733478337983	11.7025824102045	11.371911094839	8.47140992490505	8.86344144074383	8.44291594439357	8.55234321841502	12.0914179125135	11.9527302992431	8.11203798708128	12.2494026851113	11.7084013526568	7.13962858538921	11.0626089885434	4.66608586187993	8.99803311175147	8.98563650050626
A0A0D9QWP1:T2281	MKI67	T2281	7.71854126980884	8.70088958288647	4.34057274737813	8.88446912953229	6.65685610383935	8.92592522172055	8.15363250199403	4.82924658234183	7.87675794104049	8.26315263366406	7.29555398109158	8.4718833396575	9.93108179716876	11.8512908561492	11.8016739072558	10.1835763006259	7.66051119787897	8.28574881971371	6.028500109039	7.62140684402685	9.42504475837907	6.83729347912174	5.66898522696094	7.14525207144594	10.3218900839728	11.9454805418885	11.8785593493733	9.01659171515891	11.4072840259112	11.5123258551962	9.53590724409994	11.6706979647914	11.5091264424057	8.18933357985048	9.46613478761227	8.0300418645162	9.90377239905393	12.3416116797129	12.1648662208654	9.7534890671012	11.7212256097202	11.3236597150829	4.56523177802147	10.8361069198379	7.93528655127204	9.20949569803107	9.06495642656602
A0A0D9QWP9:S68		S68	11.3898508545226	11.4991504822706	11.8303932948574	10.43078722348	11.3185006324371	10.9801926897131	12.8408785572711	11.1919979992967	11.0923010928939	13.8596371068243	11.3914543184335	12.3277006160057	12.0600506090465	10.0300981655806	10.8836384364396	6.49402206994396	11.7375462018834	11.2653653494024	13.1748706388343	11.4222893088233	11.5360008410374	13.3335619768487	11.1568976404304	11.9049301728393	12.2560897418212	11.2438693189841	11.6095273455548	10.8331419122733	11.4304217140891	11.7668503615857	12.480267180001	11.3881407751326	11.9558342597195	12.5785142780659	10.7271930721366	11.5623269726571	12.268174948479	10.4706896937993	11.3019972418587	10.2547561579077	11.5213678987214	10.6813494256948	12.6407052899213	10.8973584034067	11.9569197405573	12.1394856020865	11.0034524482062
A0A0D9QWQ0:S1162	SEC31A	S1162	8.93260607541799	11.2548753503265	6.36383078857633	8.53862500211286	12.1296109838403	12.5475280664102	4.68321437577773	12.3657621357885	11.9226854410492	11.6557065666585	12.3107149130252	12.1866206804129	10.8305158098773	11.874071964717	11.0131799038797	10.5344683837688	11.6890031568132	4.91493917082651	7.05899147887213	8.40860920853911	11.0731394231804	11.3486535469757	11.8250240733917	12.1155423258382	10.9776476460975	12.0152682421979	11.2814418197776	9.61489230025484	12.2437887946028	12.3734431504773	10.918779361435	13.0130112041544	12.9730616206521	11.5658752053967	12.3338375372052	11.8278310453666	7.60265888932867	11.5937322928178	10.9129723257179	10.2510098796774	11.614199560029	6.93350795247864	11.0402655031219	12.1064131449179	11.2650304236783	11.0164708233392	11.5508512442307
A0A0D9QWQ0:S799	SEC31A	S799	11.061543946462	10.097034691641	8.62324795508	10.4198273827783	10.3478753147902	10.5531829149266	10.2835660166624	9.91546904231537	10.2323751874143	10.4934926106451	9.91364017917676	9.72302479586587	10.7803332226676	11.0477689882102	10.4213207974199	10.4801477505516	9.96321717118461	10.8539635822948	10.2261774517364	10.1969114831902	9.16459444233191	10.1471027610083	9.44285334676642	9.11516884408058	9.87388759352089	9.75298562975158	10.3102472949483	10.4738308560587	10.6789762854112	10.5125344696349	9.78471583591514	9.22078819939678	9.56769269628014	9.75609233503327	9.72763647010477	10.5117038917597	10.6275226800268	9.46008098162012	9.71629936731934	10.460690714985	9.62056458264558	11.0232654368148	10.554588321305	9.77553208568075	10.7265919358142	10.7052802224121	10.4768978375482
A0A0D9QWW9:S445	LSR	S445	14.0919299014952	13.7312668350627	14.1238004151167	12.8596051818799	12.7858360034689	12.4738903120849	12.9600757514274	12.9639405181356	13.3755464492152	14.1219496477307	13.5252949112961	13.6183379678141	13.3276853452537	12.9114462448634	13.0734006741056	13.2035773792904	13.2565257026502	13.0038265595787	13.2359676271418	13.3069592094861	13.2816735698648	13.4580703160561	13.308493941782	13.4826170092818	12.8823745939375	11.9196411734384	12.710880726712	13.4936099897566	13.4808000267534	13.9931808056465	13.8680958194242	13.336999110697	13.4679968667588	13.6517028279831	12.9740598946691	13.2391975802589	12.705818266008	12.634381403602	12.5592642878203	13.5336798140866	14.4894703442814	14.2809844259044	13.9037457062416	13.2268858039583	13.6157257312395	13.8638128591273	14.1630099016884
A0A0D9QWY1:S229	USP15	S229	12.6697403033425	13.8274825676426	13.7711858795407	12.272992270506	13.1233558871191	12.830079814615	12.1825399488594	13.5958394998839	13.6610485901194	13.5858128341558	13.7497096491574	13.7606285493099	12.9571106143539	12.9331958258712	13.1733742673583	11.9454081842238	13.1459828240654	12.9132901271268	13.2085639726118	13.4055312745801	13.3968694052547	13.1755540883309	13.6498872496813	13.8264549428662	12.1520075811574	12.6103138942333	12.5150855738267	11.4615279746066	12.460847159072	12.6691783767354	12.9180708591179	13.416883743528	13.2428225757877	12.8180312096251	13.4394597038446	13.4960536942414	11.7862241732381	12.838312702028	13.0147836071557	11.4524175486383	12.5080904152599	12.2898683416447	13.2285508798693	13.477350952263	13.4220261731872	12.6085595606212	13.1512283288097
A0A0D9QWZ1:S211	BUB3	S211	4.25595073217271	9.37163114866529	7.92511796480992	8.71219420130526	10.9685104338758	11.0916230411543	6.87454774739357	10.9833889711946	10.574520069956	8.97100483376473	10.1627351960002	10.2038154553219	9.93712502448161	10.5664654780779	9.74603017509085	9.22202566914586	10.7818207814684	10.3006105498712	11.009499017701	11.0531181939032	10.0962195186452	10.0068104092536	10.3771269072783	10.2159058972878	10.6350035476814	11.3481233027561	11.0984492191501	9.42031429832699	11.5183299892604	10.7690067979114	10.2866039456731	11.8529471960325	10.8586183773784	7.38857597079643	11.0097908268969	8.71990480576575	8.28403117515639	10.1982876279438	10.4367271730201	7.13121544320026	9.24196883207896	8.80035618250375	10.5486968938729	10.9537745728788	10.7253215944511	9.98040596510119	6.50587908526108
A0A0D9QX26:S970	CTR9	S970	6.87465234858799	7.60164056375196	8.79714082224503	9.1830247357674	9.23023192265121	8.6413984720772	9.54963563506451	8.38962114099615	8.80398966673749	7.63250575713431	9.02871291477072	8.64752367083893	9.47016211401437	8.35832413329789	8.84717228296253	8.65486055940873	8.37493042274934	8.88354135304496	8.45035952358858	6.29876210163745	1.7226199911113	7.30148356300987	9.28862547821101	8.22479991741085	7.5706795082693	9.1916439612003	8.61651528289644	4.65428606084752	7.63548020917813	6.84073597170256	8.7590335002753	6.83300054985257	7.08588525987193	9.20725558483043	8.54442398199155	6.23131490433962	8.7908730049353	9.08760511837679	9.55617675133109	7.74752491450668	7.12857215358916	8.7560011961541	8.12692861071582	4.64408107021959	8.55388897801253	8.44065307152902	7.16249018013064
A0A0D9QX26:T925	CTR9	T925	12.3094255540251	13.6650970628136	13.2498591252906	12.7449108719862	14.6166459611545	13.8230779522627	12.6413461469735	14.3199585190747	12.3164941549059	13.6723874237617	13.6458688779004	13.1986597629009	13.3367206195041	13.9111528910311	13.0627366788524	13.4985242150884	14.1805010602431	13.3345607571792	13.0137839918738	13.5346548273808	12.8643804415639	12.6839010866085	13.7210530529137	13.2233361580862	13.5500694183976	14.144109700105	13.6453303812042	13.3811310603312	14.2835298621805	14.5007598351723	13.3819479430117	13.9482483264462	14.0787883002276	12.9617596683146	14.1732568434973	13.6149310976308	13.3424524364188	14.0425889964814	13.6963593827029	13.3838163174239	13.8422537519109	13.9435786385299	13.7138383647465	14.136160538916	12.7389184823616	13.7303591668212	13.7055899830482
A0A0D9QX29:S841	WDR59	S841	8.1202780612635	12.8321274698833	7.89807876557133	11.3617040833582	9.29195905089967	12.5733259189362	11.8259945064773	12.8665865543856	12.2932967518101	9.17967244164398	8.66892404152683	4.8975377640161	12.1643778419863	8.72085095742033	3.93690354476324	8.66564662624238	8.95632344984002	12.1854846672285	12.5739572143459	7.9973564186398	8.56915971692628	11.9014713728395	12.8582867639285	12.6326120880532	8.93531432902149	12.4622790924546	8.3757321932284	8.69254742881371	12.5499854646192	12.2954183696585	7.15257738359324	8.60320256446963	6.4783071836522	12.7631003144061	12.788551309438	7.97611094252518	5.14859447356008	12.1374725340357	8.43042674496354	11.9944169468452	3.76497754729758	8.5095915725901	12.6702685765554	12.7645756182749	6.83946534838651	5.26535730046635	6.14790748429852
A0A0D9QX32:T581	EIF4G2	T581	13.4852764921943	8.93199767331744	15.0927767574352	7.16791320726104	15.3339684702389	14.9229282708841	12.5992093585669	8.96795767786818	8.91704730447428	13.4470571640454	5.9046737367319	13.7244119747288	8.43213893562797	9.30231518550381	14.9895691319858	14.0790285507913	5.67818239599147	7.93043165881524	7.28342668816941	7.78900733640244	8.59216855023094	13.2390052040474	13.5477387967037	13.7128731046189	14.6523259939106	15.0999875409629	7.72417834342535	5.84841427385624	14.4786689524335	8.90896314544288	13.8931717267029	15.9731919426571	15.8147743733152	13.320892130742	13.7951004739923	14.0251472033741	6.48227618039577	14.9920075537209	14.7433288186221	13.778978098612	8.69442536784405	14.3873864938071	13.8006172834784	15.4774605837594	15.5520708627968	13.2899116129079	8.88605772982411
A0A0D9QX38:S1518	SHROOM3	S1518	9.24423039055853	5.13374350190339	8.05083907592051	10.7549818430062	7.37495841117775	9.08204471931473	4.16795658052752	9.20240308759777	8.97965293244811	5.25019354715169	5.85096296725381	7.48895435293923	8.9051276353331	7.99266292833608	8.19788490864627	11.4536928660712	11.0262221636335	11.2555621795073	7.15953889504782	8.67787247495622	7.66368519316831	11.1753788284813	8.41012548064734	8.51797749580897	8.69672290342916	7.53867154193987	10.9615345622976	11.2597273669079	10.7005408003601	10.7863985734269	6.87811988238178	8.75429979559615	8.65047924032431	10.9519754716708	7.0804871355124	8.41727411168757	8.41926296243753	10.5639611696121	7.42212374702084	7.6743581967346	9.30181860453643	7.49440665425191	9.30169648403341	8.47952538486165	7.3875998493059	7.26170410246879	11.2808763777112
A0A0D9QX38:S942	SHROOM3	S942	2.87220986229797	1.82536719945073	8.51399815673018	5.35685915173153	10.7839225703596	8.44471245016115	9.05322356172505	8.64539531554261	7.19176837413796	9.38439767896401	8.10370299091812	9.18750482028875	9.09784917302591	8.23893776925513	8.07542561258434	6.55576045191694	7.02551830779766	8.39968350644445	7.5650889491862	4.60411808527435	9.78870139541751	9.85681472827714	8.56989943122201	10.2007313069959	2.88132980275268	9.65704720686799	10.6599054350762	8.00493419505768	9.26857094737641	8.4428081223726	8.77747405081593	7.39540472696424	8.36858324147826	7.40200547631692	10.8377493083987	10.754549086758	7.10784732798358	6.644276607978	7.9224060544231	8.40588239352439	6.19761016032251	5.37936235489019	8.87186695740145	7.81689087472921	8.51808309102462	9.8555228805684	10.0293807200892
A0A0D9QX45:T324	TSFM	T324	10.4012646599624	9.46134356106875	6.185566133047	5.23219011406576	8.1124228591077	9.15422402479251	8.86150182120566	9.74073890115206	9.30243507915563	8.9902761700004	9.7507498398679	9.61028771548107	9.189821902048	9.34099010875642	8.05850709085336	10.1249745492851	9.91298946735972	9.79615021043863	9.03156169927153	9.51814086510758	9.23158017876526	9.65224771793425	9.18855932114354	9.05197253371134	9.49860755101745	9.91526908026772	9.28717983693377	7.246807667743	8.64908389154348	7.82622943799716	7.64374116236024	8.81948884568013	9.13068749475028	9.33612607114363	9.9830664976607	10.2422313734144	8.47664558351739	9.19938117691402	9.41018242500235	7.16752386150176	9.61669393496023	8.49517948527554	8.57282240029921	9.2742174034593	10.1832545785617	7.46307668636924	10.3179091401217
A0A0D9QX55:T268	METTL1	T268	3.69972355648405	8.0853349433907	4.29396726518921	7.23443966898744	8.01955202253941	9.34102637274375	7.07538381066687	6.19594444217206	6.38759988144784	10.1939527672092	11.6709733342252	10.6717492531626	5.77805830176455	9.09627050763028	8.31063294848859	7.88484585658005	8.31622448431257	8.44295494125257	10.0277309222972	6.83246082752196	4.75752813164604	10.1794890372224	8.74648641649119	8.304352470403	6.85574640309931	8.80968237416168	8.71705660073683	8.95845703422775	9.41237852364333	8.90430523331027	8.44909321911699	6.50095116845334	12.0535749194888	9.42411386788275	10.4806768574335	8.32925469020081	6.19346971166428	7.83136849980944	8.07463136935737	9.10910792492849	7.83632372989046	7.72191077832256	7.57572454251954	11.5625854587561	9.26450950286986	8.85470146217159	8.21981690302737
A0A0D9QX68:S1806	TACC2	S1806	13.8568553665592	14.8460702410144	14.8856309298793	12.3544976776695	14.1328878551448	13.9946436462237	13.6241133139032	14.462217363566	14.219367846146	15.503712501938	15.2500228337971	15.5854569963204	13.1589174271132	13.5645789769834	13.1885635222537	13.0000651259499	13.7092740555985	13.7341320427026	14.2002693662574	14.0510413371654	14.0638460172892	14.5889623633116	15.5721661335571	15.4929859317021	12.4724213974501	13.2867884534283	12.9543324372337	8.52021689548738	14.3334945509159	14.3765058791483	7.64265792440156	14.3766306867251	14.4125817486971	14.6152540103048	14.9590462456546	15.3768975151127	12.7477260602442	13.7136899749649	13.510456234986	7.23450616085289	12.7248745555783	12.7615755073922	7.63999434144186	14.4733083735202	14.7500224263121	9.27616191541665	14.2380428108418
A0A0D9QX69:S812	USP47	S812	7.18573768133464	7.3034720868713	8.54327710069983	9.3415269208005	7.12185936068139	6.24980581135744	9.47537837303994	6.95610725798322	4.74526066984701	9.20837023695584	9.10782890243897	8.02736321330802	7.1928774635768	7.36046947090011	9.05982733818221	10.1344728797509	7.43559776076093	8.97856318685501	7.27035560692977	8.56077154097821	5.88304650481554	9.48540403671416	8.77047087677404	7.64741798121187	9.24177249140046	6.08071067710376	6.54180721770314	9.34499207928612	8.51214281900408	7.69839603538614	8.66164516299095	7.95860905250017	11.2560236933067	9.26197625543342	8.89479354028338	11.2644620884795	9.41990400473548	6.01107440608654	9.67047307509161	5.57955358520863	6.0699877355129	9.69964974492833	9.46612661975297	6.22472386252668	9.13155939918539	7.01878950949692	9.45075366322706
A0A0D9QX69:S890	USP47	S890	11.7211101329123	11.5732185447122	10.9040919319964	9.61279089049175	11.2167521320483	11.3469844056319	10.7112170674515	11.0692869623901	10.3788337786639	12.3466465439443	12.2852211291265	12.3652926625566	10.8297310403823	11.2974400698946	9.85872046904698	11.4531647195401	11.659096553614	11.1965580182945	10.7130314262933	10.4653238018323	10.7279835250753	11.6840207568653	12.0375419067493	11.6602913736387	10.4665993582148	10.5063947708288	10.5270557507493	10.4568168860476	10.8718925135822	10.4498836239306	11.506600457931	10.6832325866061	10.6744455132824	11.2133312817018	10.9433151317129	11.6525670761352	10.4603839813163	11.1875640409236	10.6765688240607	11.0558567437797	10.9729560153301	10.6411843583716	10.7741886347331	11.2194688171712	11.4074434600917	11.4030085543653	11.781188238221
A0A0D9QX69:S913	USP47	S913	7.68024425024733	9.3675121359982	6.28746700382167	10.0412745676567	9.89004552480967	9.38792707781412	9.42792038140663	6.72462338002605	7.28714713703155	5.80354653954664	10.784482300202	10.3417536471065	9.00403418696006	6.60202219103939	9.16229679601093	10.4347286124633	9.42278755892801	8.30313874728091	10.5098938891937	9.24686845420804	6.49286757455066	10.7384249205015	10.6073211926793	8.84775465262998	7.41283698749402	10.0916589141491	8.95903986742622	10.0684678687817	10.8452996266209	10.5796227833119	10.1850011874073	9.18679893726527	6.61656792931081	10.2476759654921	9.09523756957423	6.84457090612282	10.2507122083968	10.1982681056632	8.90840437307707	7.33877448914575	7.48104150175452	7.48289643910828	10.7104819295398	8.17331131848337	4.73065143516749	8.52813026470319	10.4187043117001
A0A0D9QX75:S194	DYNC1LI2	S194	12.5955937995434	9.83772300565801	11.4245908466912	12.5536488542203	10.2282104815695	11.6982058574558	13.5719763271688	10.7800350300016	11.6641499791747	11.0571457669813	9.97644195416771	10.2378243790807	12.744246335108	11.1419355166515	12.1068911628797	11.9329625645578	12.2067742534901	11.1537540325302	12.6996435937061	11.8349927664991	12.4345619308419	12.2533150297659	11.2204934714648	11.3005846815761	13.0803932643415	11.9302089532652	12.257795018631	11.8197611060776	11.043396207643	10.7825246352937	12.6574235868886	10.1479644418189	10.3475147903727	12.0542986562261	10.7136731951162	11.5979174667759	12.6922769134051	11.5854346652431	11.627641980549	12.4061110876372	12.1338318427295	12.1099841244981	12.3138435286932	10.3582337821381	11.5003164938865	11.5860799419965	12.7659898641563
A0A0D9QX89:S64	GPI	S64	10.1306133324923	10.8343295143267	10.5879020916715	10.1465375073363	10.7746492870537	10.9925283643636	5.6487953961515	8.5263251980165	10.8750568717911	10.4369774651791	10.7508497851411	10.5167490645367	11.1297369711858	10.5299802792149	11.1276014814707	5.71002131627448	10.6359550909337	10.5654433483227	7.9347732683896	10.0202030610979	10.6515486647855	10.5239278784416	10.6168023285058	10.6828776561374	10.571093585985	7.83455153363881	10.3515901787179	7.61338561960586	10.6789712290344	8.48390133388835	9.26306508634126	9.77170520158237	10.7254702532639	7.97043211945808	9.34108708162774	7.76926922506888	6.97776226360184	9.83355784677013	10.6482531820274	10.1083912410792	8.73275614319627	4.5717357306993	10.2551399056553	6.91696748572282	2.84261707902123	10.5656978085321	10.6648813841923
A0A0D9QX91:S723	GARRE1	S723	9.98120929698646	10.6229683319574	10.9510666038832	10.4702762182212	12.1781510297107	12.1561051347825	6.71278836181602	11.9716691840502	11.4774028769993	11.0197715653127	10.3906940376926	11.1601695312271	11.1317217221488	11.7673799356146	11.7302906938875	10.5497674078062	12.2283825690308	11.6408863174355	11.5051269806262	11.1398976432698	11.1387942321269	10.1052225762072	11.6736703618337	10.7772680483741	12.2660369642628	12.4021506512158	12.561698708924	10.9457096530189	12.3463893874638	12.1642030679539	9.8889441422736	11.8475155210024	11.7530458123533	11.3748792484369	11.525633157898	11.1914131249035	10.888013829214	11.9083337802495	11.9254468268942	11.0276433566153	9.96868770687058	10.6719326829387	11.3080604900537	11.8437946445158	9.92362950371825	11.0074542512522	10.4930845527093
A0A0D9QX96:S192	LSM14A	S192	3.91398692190183	9.34609836569181	10.9868324139714	8.72512630286524	13.8642002107851	12.5822464024983	4.79845960589579	11.6051106304291	11.071860714204	8.44653953221322	12.2921278175682	11.1822751198969	8.1056736113798	12.2450527716687	9.22495025546542	9.33294084980625	11.2190728589995	10.7721797937518	8.3424262555829	11.0333391389874	8.58906726401625	8.24151936990304	9.08564131719201	7.69731507660074	12.3527668520904	11.9827420640615	11.420237506083	8.30647369730308	12.9747274502945	12.2338168466648	8.68033933618551	5.8503755755397	8.8615552946125	4.72520093431264	11.3713344915755	7.63964591250484	11.4963628198706	12.2876477795746	7.18982347164547	2.7184665901763	8.52150400102092	7.49240770584708	6.38912852680214	8.61726985697559	6.55940604636147	7.36631245565797	12.2644606947539
A0A0D9QXA9:S35	KCTD15	S35	8.98415608616706	5.83295568598897	6.06422918035156	9.75207818445041	9.02843282083134	10.4252706985703	6.4637286410224	9.4306658895291	9.46790221660556	8.75315797891431	8.72285030378131	9.72596658132828	8.6779208213231	9.75118628162866	8.39879535065279	8.41097917208948	9.97279879191633	9.16552446077811	8.01426382594146	7.99392891580949	8.26265358256852	8.42175215716179	10.2669728210457	8.80785067628554	9.93443081763431	9.18409680916541	8.12743472959161	7.65169577021931	9.82347986424888	10.5023016080196	8.27393589885946	9.73938609865584	9.21952661209158	8.9253122658016	9.29945682172422	9.00120075603751	8.50080097827317	8.7396951960999	8.53870994461625	9.07429406763869	9.29146693682267	9.14655954618529	9.27867036947434	10.3803754911134	8.14967332121578	9.91415622018249	9.49865370045276
A0A0D9QXA9:S38	KCTD15	S38	8.51459804464615	8.53378055433516	8.34383423628185	9.75207818445041	9.02843282083134	9.66755591254154	8.65778983445567	9.4306658895291	9.46790221660556	8.75315797891431	8.72285030378131	9.72596658132828	7.35071371434954	9.75118628162866	8.39879535065279	8.41097917208948	9.97279879191633	6.75353841443815	8.01426382594146	7.99392891580949	8.26265358256852	6.49570047165246	9.87766076971672	8.80785067628554	9.93443081763431	9.18409680916541	8.18726529386095	7.65169577021931	9.82347986424888	9.84450435135773	8.27393589885946	9.73938609865584	9.21952661209158	8.9253122658016	9.29945682172422	9.00120075603751	8.50080097827317	8.326107247223	8.53870994461625	9.07429406763869	8.34134895396453	9.14655954618529	7.09454522286047	9.99474657484595	8.14967332121578	9.91415622018249	8.71335420755071
A0A0D9QXE3:S87	JPT1	S87	9.12742994769993	7.35431176883613	12.6347744934206	12.1362835345088	11.4774102419741	11.8723998932471	9.28386400159747	11.5892039351099	11.5886138146668	7.96540688000603	12.0203353693279	11.4855655652453	8.68768692183492	7.71507951959455	12.3450676619082	12.8574286015102	12.5345736794754	12.5146037594219	7.41594654992481	9.25694358133956	8.63201411408014	12.5219174564326	12.2177727773852	7.35541862701782	8.79134952817427	8.96676085137501	7.78223040486055	12.5385759489391	12.4574636158198	12.3387106128215	12.4689903454809	11.2497160001474	11.6506481768298	11.6289760908788	12.0049274169908	8.93257455932678	4.75687844782138	11.2685903294587	7.90483506341401	9.34014885457411	8.8137227426116	12.3444891493407	11.3305950210478	8.35049073103534	11.8839754154401	13.0625128109163	12.7530812115755
A0A0D9QXF4:S154	MCMBP	S154	11.9877883104814	12.101782130403	12.2169922325681	12.2276299429373	11.7277406324852	11.8577423175729	12.5551187609169	12.0204697667171	12.1688607737659	12.5112162642398	12.0396612792034	12.255250026361	12.3269464835354	11.8722167235015	11.7733050481189	12.3264516010495	12.1874202222229	12.3618417051632	12.47975682851	12.2432838754575	12.3610972440832	12.6083106598339	12.5580901586744	12.2511114498162	12.0990133836564	12.1435126058765	11.8534197274377	11.9865816677313	11.7602078930518	11.8116459181173	12.1826531595962	11.9645896536316	12.0837122958884	12.0013201459371	11.9805559203263	12.0527513712988	11.932762579301	11.771166739647	12.2361670602851	11.7329326186686	11.2864740836724	11.4995251099982	12.2770648532559	12.0093970569369	10.539810938525	12.4499821137939	12.1507134709136
A0A0D9QXG2:S942	INPP5F	S942	9.24543219875525	8.37660557905687	9.26737683183164	8.48835717073097	8.29060139529735	9.7349886608553	7.30425146269851	10.3872392032521	7.63404555878974	7.07499192010774	9.4399454848529	4.47229098676571	8.80937315331474	7.48960754366042	8.11301987470677	8.43914984491352	9.46082140138547	6.67196661117995	8.1398708331635	8.28274168037017	8.72496370123997	8.4264562333891	7.67588225427152	7.36410840775585	8.82150353363449	7.86567933771839	9.05650250819318	6.22827950978568	8.47993787692377	7.85922727150887	7.56936586703596	8.84321989804601	7.00045453435865	8.84171170762463	8.40357864413043	9.42099881963295	9.08830347440152	8.99655525947446	8.99636385153925	4.46241728889932	9.32124117636534	7.72516993234342	8.33427645824852	6.99240920868839	7.59551405324477	8.89817334444212	8.52246623492185
A0A0D9QXG8:S289	BAG3	S289	6.28534892476363	9.95389612738051	4.57438174784772	5.81394905252528	12.2747424346492	12.2617760899547	9.54693627637023	8.03819710001911	10.3842649221542	8.02019054929521	10.5097074985497	11.2897837882678	7.00016019150478	9.29965098669136	11.244725906313	8.76198238361919	11.7639403587125	11.3222482677764	5.34771729085508	11.0883005189286	10.5571202293915	6.69892437873167	11.2469202728621	9.16388042624935	10.9988113194465	11.4039075548917	11.690675773466	10.8221116660942	12.3751326412634	11.6761157391393	3.77897148207372	11.3084975757021	11.340048165011	11.396479568375	11.5372937187896	11.6722154758962	8.60228214838457	11.1319813125544	11.1224705702572	7.21523928436559	10.1219553263112	8.71301135243165	4.99424164462472	7.0198831172041	11.0878192529273	10.8600655254858	10.4109735219336
A0A0D9QXJ5:S891	CASKIN2	S891	6.59113008476954	8.33540422762891	5.59336948360106	6.76557454791792	6.56952088804686	8.79564532111161	6.49232658350034	10.4461765816655	6.13743097400699	8.34616547275107	8.36719619710413	6.08816683026375	6.55433620129496	10.7303232225164	10.1241997538438	5.24162155211944	9.39629529664935	9.23824797292086	8.14355667146027	6.32124152144866	6.09185587872195	8.50133128210293	7.35795862526513	6.8517746588127	11.0010961046775	11.1738937345139	11.0727748679989	6.85895609419821	10.3387253383893	5.50739375505284	8.08627917337556	5.59220176449855	9.21949941101077	5.46583088173366	7.99491394937465	6.882933981127	8.69686558525804	8.17500211019421	6.26826952449833	7.88793272070179	9.15069157672236	5.86935776868198	7.65006049629293	8.69411511829583	5.27614866551143	9.26642760884864	9.04401347521837
A0A0D9QXJ7:S498	PLEKHA7	S498	11.8078263741995	12.142505296217	11.8855586761576	11.26044219569	12.0428016132598	11.9613307961707	11.5835446503774	12.1706312511431	11.8196348748003	12.4997355241264	11.9115869300295	12.4003524126236	11.5799236443706	11.9287215297156	12.0888440746809	11.6962939207036	11.9782185938667	12.0857314941621	12.8224108887402	11.7720370201758	11.7086022073692	11.3474009419847	12.1349888583226	11.7974971099402	11.6304555004013	11.5542599642349	11.8014581313999	10.9490886901795	11.358912140432	11.1652974978884	11.728987886455	11.7222749552612	11.5272973709666	12.4008510674505	11.812437644683	12.4063460554423	11.4583009910261	11.8400641822662	11.8256471151995	10.4179915283727	12.1549716869051	11.4309368697692	12.5641159550096	12.0059986330907	11.5658435248238	11.5747799886654	11.306375228564
A0A0D9QXJ7:S506	PLEKHA7	S506	12.1678274578256	12.9567205285131	13.1417045374617	11.7254498911133	12.9321521195371	12.9686749011926	11.0481664239003	12.8555732936445	13.293942076169	12.4699370509522	12.532789707662	12.6170030338598	12.9276322181897	13.2166202276634	13.3149690158553	12.4062929616579	13.1704775932849	12.7997951795509	13.0861119762968	13.1091776439636	12.8286320488901	11.9860776782074	12.453150812607	12.0940170198726	12.6799439170436	13.7619603775701	13.3024265556373	11.5791925249926	12.5835636982498	6.63590004538593	12.4738835975793	13.5534589528645	8.19825017293883	13.0847114959812	12.4706200184335	12.6422150501665	12.420987133218	13.4231681994937	13.3393071152455	11.6478641857879	12.8516877174577	9.3744417694779	13.2072587774682	13.3589789632801	13.1804882132781	12.142459231413	12.0484958085029
A0A0D9QXJ9:S642	RHPN2	S642	8.12033204976387	7.57677068889495	9.24956918241079	9.12708933992001	11.4487625307794	9.08243057553753	7.84926405674799	9.5932004123188	7.03869437517616	9.89066488633243	10.8832470583061	9.84634959572558	7.74707177565793	5.4621104135069	6.01158840919287	6.64485455802799	10.4610306140646	10.0880251208051	9.25739201715972	5.6323441751745	7.35441122718578	7.6315687556531	8.59249038284539	7.30393256576463	8.86010861990539	10.1636811080209	9.63844183262591	9.18585875509079	10.9869745649783	10.1307126755312	7.61142076919338	6.06888061937876	7.93443512650354	8.29963738884524	11.3338808173954	9.97993310459812	4.57890571637811	9.90512634886289	8.85615513640631	8.28610147289314	8.61080746208847	9.024486840457	9.21955601337521	9.13954106058252	8.96821259378754	9.82390257916115	10.3732009172923
A0A0D9QXJ9:T606	RHPN2	T606	5.41442945909487	5.66978621037764	10.8213889032855	10.9784141744914	7.61863300620645	10.6801480849298	6.85052591584478	7.16030971393552	11.4140875162458	8.5115758592939	8.78594635997128	11.7638251530736	11.3065673761416	9.24324023052779	9.27180205013682	8.69085647782017	11.0176985869923	6.18085874211024	11.6187336919392	11.1897133211841	11.1797151438092	6.64335635111768	8.98594014972323	11.6467210253329	11.5476495634767	11.501918229455	9.13313509307895	6.86809805573293	11.1235992889495	11.4381111444546	10.7042826528936	8.59705323997132	10.8153100571245	10.6085461166067	11.3620585914959	11.2535892416525	7.97721519766721	9.00362067126705	8.71942638914421	8.33906161618634	8.06868816319453	8.93962889089851	10.8391969910136	10.1202519673362	7.62659102675364	10.8680637056094	12.4145410252859
A0A0D9QXK4:S259	PIK3C2A	S259	12.6211231713522	13.7283769253538	13.0534193894036	11.4382313410873	14.2182818572705	14.1558991555044	12.3566626016539	14.0383636146251	13.7455318237282	13.4168270491393	13.5730781890774	13.8710111494538	12.6735945959684	13.1019717524701	13.2131011216154	12.6674662162877	13.9651055614528	14.0499409523828	13.8324660575649	13.1401368639531	13.410210759571	13.4326562294582	14.558719422684	14.3155121800213	13.082183703904	13.4062088924058	13.3397705886369	12.095369473747	13.7963096442065	13.8872184418869	13.0908224975666	14.1209094469902	14.1285443333662	13.883552397872	14.4353346180035	14.7579500957916	11.8639708503227	13.0951136129168	13.3041382755262	11.7257296736897	12.8858807739324	12.6389918653964	13.2758976804735	13.8054033944066	13.5460056875809	13.4875889366212	13.8792230962155
A0A0D9QXL4:S584	EIF3A	S584	12.450821963728	12.2257275989925	12.6805465322845	11.8501827829839	13.4340842604035	13.2423540332094	10.7237518002681	13.4752290679046	13.1930875901438	11.8109776546974	12.57037975158	12.4178930340987	11.929923209269	12.599687975264	12.4043142374545	12.2260669169429	13.0787862540797	12.6853866543241	12.8292522236332	13.3687150619628	13.0737102808031	11.5931095119711	12.520947989631	12.3744949444974	11.7804562032382	13.4120648581266	12.896030232063	11.6147977531661	12.8320332081366	12.5988973935359	11.9806992801087	13.3628808757266	13.0950385075415	12.1847177294826	13.0935887961674	13.0235918116277	11.116004283979	13.2485463597076	13.0200776558476	10.9082521717101	12.1244965570386	11.6140438884829	13.0686736932474	13.1203172341047	12.9949278238745	11.9730865924517	12.6731121470521
A0A0D9QXN1:S496	PDZD8	S496	7.69958759581422	9.91289411376206	9.88345802842595	9.75591274898014	11.4041212409908	10.9250789688932	8.29666810279332	8.81737261793686	9.27968631369149	9.08317336408014	10.9600751043872	10.5067035259458	5.76362416390139	9.79515146897405	6.49979938658245	9.73246185903809	6.53962238144872	8.67710424959533	9.69892605737357	11.2676913522295	9.89968013984043	6.78287038332171	10.7026063489046	9.0703672548189	9.07028953227512	10.8588251846607	9.73852415354319	9.82372020728722	12.4925995716127	11.9746007121007	8.90698145658451	10.8891013072006	10.3308072691583	8.20898657389647	11.4636697693581	7.30505805398458	5.54380449546472	11.074115381593	9.56159362246982	9.90507667708773	11.6327650505655	11.6398485472823	7.98761524548898	10.3546964215701	9.74587349051845	10.9837294643251	11.8149357564223
A0A0D9QXN5:S267	TSEN54	S267	2.31055830255736	6.02813082592311	9.68881741505167	7.2025527852472	11.2587458398622	10.6918066296293	2.21237386099215	10.6325377539883	9.18384345530284	7.7043666923298	9.13708877647571	4.74345405505235	7.0100392428998	11.1666608829174	11.011810375557	5.9159571043512	10.4649110333304	8.97060884202341	6.74292176739638	7.97972860706567	6.98522053437973	9.80199434723068	6.88389485475916	5.11167045105822	11.0061626713682	11.5760649756175	11.0847747055939	7.71158294997749	10.5305540970111	4.75048625578588	7.28505087236794	12.3793285028651	11.5643743872112	8.52884784051043	9.3042036915024	10.0384142827678	8.68611201926998	11.3967986885054	11.0257502195503	6.58902060220108	10.3323751120312	9.07749298374779	4.81008251450936	9.84231815984799	7.76452613482136	8.46001088705111	7.1078168323219
A0A0D9QXQ0:S494	SHTN1	S494	10.8635113411306	5.38774956272412	7.3214064911819	4.69179602589431	7.03563541980922	6.12811698100711	7.11743839624419	8.32510920049258	8.39388127129435	11.7135099486403	12.0227883013779	9.17944413142211	11.7133061242948	7.76828596406835	11.4597877092834	8.37503720354993	8.77572150195745	9.18199450325625	6.8268158347771	5.60196662070613	8.63371848921874	8.54132948468073	12.3402629890677	11.7728157197922	6.85694399837995	11.9950537401542	11.3789950204007	8.34842445484666	11.6284831478007	8.7534593004942	11.7565237575607	12.0905982359856	11.3142944370734	11.8967054821656	11.9698656908598	9.31772791272634	6.46043634859545	11.748109162088	8.39059407875036	6.48259066715455	10.468307863067	8.20234134159395	12.9163910363119	8.80107925055292	12.2610251970324	6.56737519259016	8.40333549756092
A0A0D9QXQ3:S1583	ANKRD17	S1583	12.8932657063708	11.2982086600052	11.988154194239	8.35967795752516	11.3799095883976	11.3200821564315	13.0091362278799	11.8537460790992	10.9633963087735	8.50800175758083	11.0213889442938	10.8757021825702	11.9340810308689	12.2758684253273	12.8198460704905	11.0131424288155	11.5813981916433	13.1633585408226	12.6232054956975	11.8879181140849	12.0060825251045	12.2971694845384	7.88784643362068	11.4513399993154	12.1701448867375	12.0090928161868	11.556730529565	13.0148282012062	11.4046307426462	12.8474236934185	12.1559442285229	11.0530984997617	11.2648037528748	10.6400636928615	8.18137047385573	11.4713135464159	13.3618923294397	12.5739402804708	13.3831164562263	13.2971246710158	11.623502186444	12.6568398582429	11.7712588657061	12.0897423139639	11.9281501534111	5.81999432842869	11.1518052249175
A0A0D9QXQ3:S1587	ANKRD17	S1587	12.3216476138304	3.89372121096049	11.988154194239	7.16670915328107	11.3799095883976	11.3200821564315	12.5211998786328	11.8537460790992	7.52312961650442	8.50169770961332	6.18138963215808	10.8757021825702	8.65122353260638	12.2758684253273	12.8198460704905	7.11912162005797	7.05235086007574	12.5957039161416	11.1687376966285	11.8879181140849	12.0060825251045	12.2971694845384	8.1629471331569	7.78445980871009	12.1701448867375	12.0090928161868	8.55679100151656	13.0148282012062	6.20261389595335	12.4383856909956	12.1559442285229	11.0530984997617	11.2648037528748	6.71410427500529	5.01361802519983	11.4713135464159	13.3618923294397	12.0176038259386	13.0205582546308	13.1195662235534	11.623502186444	12.6568398582429	9.431462385225	12.0897423139639	8.12896781230774	7.68894751938954	11.1518052249175
A0A0D9QXQ3:S1954	ANKRD17	S1954	11.7520888222269	8.82827870264307	7.47602190775748	5.13365643758517	8.68943054939716	11.2731440981273	12.0814806668581	11.2286258209089	11.6362495943626	4.09268663212848	9.19261865402718	7.37282281765541	9.01875441952958	11.9698019126488	12.304606598105	12.0566672400805	11.5911381073004	12.2404967537284	7.54646708490499	9.07082185620201	9.20563983637917	11.8463965821379	10.4213416035158	10.7566267351476	11.7127639107706	11.4507739403915	9.4295393552491	11.94379958795	8.62439167630318	11.4461063046472	11.5426471534433	10.0791712459053	10.5617508281551	8.40438505793933	10.5983479117791	10.4258707376844	12.062161500957	11.3499143800744	9.13741403656587	12.528979663212	11.4718028801889	12.0984622917521	9.17700205268393	10.6612237583626	5.95480930633522	11.2380745575142	10.125064784106
A0A0D9QXQ9:S195	ZNF507	S195	11.1658862870838	10.6152548258941	9.65279200843793	10.7462181433534	9.95980090561848	10.06918168187	11.3576704048743	10.0408273233702	8.75388926572313	10.286543477615	9.27422747997933	9.10935014458932	8.97385392324698	8.43436489946522	11.2318482377874	10.5927714408366	6.05871106419032	10.2893167229887	11.1915340441786	10.6152587807245	10.9296893751066	10.5128970818579	10.137820604318	9.83380520470117	8.16652959545009	7.10927426606462	8.89079579405334	11.2477434734041	10.1846094431588	10.1635479361709	10.6407774363482	7.1178528119665	7.74218961805907	9.91678918853836	9.68810882559862	8.86000489908362	11.1247677840657	10.8923885099582	7.60115219045142	4.511107336447	8.40649486048111	9.83539001467083	10.9454863440185	9.84232318047664	9.33351338830559	10.4516616918682	8.02831773472651
A0A0D9QXT1:S43	SAP30BP	S43	12.0617290999579	11.6674917878076	10.9539725420433	11.7807187937005	11.7306790823621	11.622378281495	11.9133962092272	12.0448978989406	11.467585550356	12.0930994038857	11.9031038450097	11.7755519819291	12.5180909492075	11.7569989338162	11.705127387548	11.9176080081685	11.95995229072	11.5334410299904	11.9201350552398	12.3481526434628	11.7223953948458	11.3246814396132	11.8036119259796	12.3018061895134	8.62877910667633	11.1472605755655	12.0368137638315	12.3118804820541	11.0140966931147	11.506393874003	12.1187941022309	11.4672994573737	11.6785861412559	11.953911001368	11.9372152424421	12.0221608469072	8.39815381659421	11.9963811751283	12.0087208345331	11.5756286812834	11.6634956492326	11.9624825499956	11.6039147019299	12.0576306720023	11.0787055660307	11.976765137013	12.2008635325475
A0A0D9QXT1:S52	SAP30BP	S52	8.04247928863955	5.34996565791196	7.15296535138812	9.88455505436868	7.37539842872683	9.61669385497025	6.60671698279114	8.34853355174739	9.35157350089301	10.6737063318345	10.8135166180287	10.7145213835537	10.1972816637689	9.68838784618245	10.1088745318601	10.4533121817785	9.79459964311192	9.45611532596089	8.11281598482426	8.33187361019009	6.86901020031592	8.6200408084783	10.9661966247153	10.3179108062589	9.32819184924147	9.92957398480888	9.90047489675292	10.7885387177612	9.90381922762465	10.4152473227494	6.71734852108148	8.93228243808626	8.31595203245883	9.28759992342647	11.3655607467364	11.577895123531	8.95519613357447	10.8900060473433	9.93001006305119	9.83542598960883	8.94141764743235	9.88636866558286	7.94480059603233	8.29592736556889	7.80009032306535	11.5820537108173	11.5959155093646
A0A0D9QXT6:T40	MOB1B	T40	9.18809612669819	4.27989785777478	7.91384297752594	10.4404490898084	11.0532720995768	11.3084051087095	10.4104487010535	11.4560460576195	7.11830411676182	9.37651461615654	11.4116063199342	11.0828028823203	10.8474100819708	9.31809867193718	10.9220633495713	10.6297163874621	10.86532784081	11.3544539248509	11.1426018297557	10.8647364690873	11.4350886126668	3.74396611988699	11.2875456406523	11.0196936814603	11.0696324039268	11.465123951755	11.5415493871257	5.71922851021425	8.74680312483943	11.3082449672195	7.46917706352448	11.2335072702777	10.3463759868416	10.3522798439049	11.4708356652708	11.5890051482752	8.43083995279897	11.1518960081954	11.7806508609532	8.55129960382441	3.46391072756924	8.59960960788288	11.6962517216384	7.75524522388063	5.9816155791597	8.91058454341047	10.8183622632511
A0A0D9QXU1:S385	UNK	S385	6.39620810326977	12.5689089209322	12.7859120017532	12.191859970903	13.1138392049409	13.0489352699226	6.99503589740538	13.1300303651892	13.1558835822786	8.57405378400871	12.6257892706379	12.2676980351763	8.12236178283657	13.0206847532712	12.5029558584103	12.8030203208289	13.0610795980639	12.8600596478508	8.89630202028448	12.5026015755485	12.8648671870271	12.3480267456378	9.17868303725533	12.7179178739194	12.9081755683695	13.0437089807909	13.0653918987419	12.4784901790694	12.8862783433266	12.6004284284611	12.4284698930634	12.8328039510807	12.3242040382409	13.2962783322334	13.0007373983704	12.9046876753966	12.7737165774343	13.0403676416789	12.6490324917629	12.6278202058013	12.8386515790949	12.4017068964735	12.8585827433536	13.1053438212145	5.61065672880748	8.84365451115805	13.1334162378886
A0A0D9QXU1:S447	UNK	S447	13.3201452562074	14.1014010293264	13.6873722073064	12.4082045625337	12.7291313546845	12.453667154914	13.3144601959087	13.7902558434188	13.8092747873472	11.7690494211128	11.2892360981278	10.974600955333	13.3111574484415	12.3092221156818	12.4501910883635	12.8881444184144	12.8292986010431	12.8923007109766	13.9620466943625	13.8720621640625	13.5675498615611	11.971831659063	11.9826835460835	11.9753549925503	12.864528638902	12.9014916574876	12.6038415377736	11.8702298985349	11.3213801655435	11.4598734261893	13.939138994527	13.9393171666379	14.0879657068624	12.2389926773256	11.8283135075078	12.2811415901297	12.3734018709998	12.9832102865844	13.1669065220456	11.256142919958	12.5157717210295	12.4309075272814	13.9123101460236	13.9286064792025	12.4041431309574	12.4733468676746	12.7454311617341
A0A0D9QXX0:S448	CCDC102A	S448	9.37410275340651	7.35762583608802	9.03336638220316	9.66685035058493	10.2614324497076	9.80748071529748	9.27576432308126	9.31669643698558	7.96245395001873	9.7160395476036	9.793636384761	10.1189802667167	8.15097502801536	9.6781410749304	8.9781659809457	10.3074605803109	10.4697636839022	10.4669119406876	8.79518286726105	8.08017480583565	5.21138945350265	7.94543849750924	10.4375923963315	9.03802071096459	10.0302346051887	10.4338401426534	10.0687523239893	9.17648294060935	11.9228956561678	11.2299743380343	8.82748194795645	10.120003039473	10.1499972921525	9.68654563464431	11.0603258500381	10.2413247650713	9.64037173017505	10.2547457843532	9.94108574839892	10.3809091960896	7.16035954901895	9.24382647309765	10.3107428292887	10.5596119494384	10.3744589836645	10.5910540085742	10.2953402744394
A0A0D9QXX9:S459	ABLIM1	S459	12.0119794982947	14.1390264720458	14.522581735626	11.9972771024301	13.8362453963002	13.9591608689213	12.8723247392047	11.1538211460854	14.3995086728517	8.46624014792076	13.3686443096654	13.2654519667693	14.0212453003242	14.1665562174059	14.2705356946802	14.0157266120933	11.0177248710828	11.3067057253124	14.3949691273356	14.0862409445536	14.6043444880097	8.48777635040184	14.0012138019065	13.8848578575863	13.6522629367995	11.1392821320683	14.2389117026172	8.84267588669918	14.2074632208984	14.2874188467937	13.9980350436377	9.28407946330215	14.6661015775923	13.5535539922199	13.9165802063682	14.123576151883	14.0297617547926	11.5922949479212	14.2743948738897	13.5300297746624	13.3112320282492	5.25293594902227	11.8001367107716	14.1961643763547	11.6794815448317	11.9447311188376	13.7003463058283
A0A0D9QXX9:S463	ABLIM1	S463	12.0119794982947	8.13611935548108	11.5734709500208	11.9972771024301	8.16468572683293	10.8361005980284	7.74534907951298	9.32611998856387	11.5431356057957	9.43507494324285	8.61364161213728	4.99025548309137	6.44249994448037	10.6096333130248	11.3207683393849	12.3600948213143	11.0177248710828	11.3067057253124	7.84875152738354	6.01893940017326	11.9438635246784	8.98641008924726	10.2773401816177	8.52764120956247	8.73121603778394	11.1392821320683	11.1934001164819	7.99329992930267	8.830086426216	9.21405652796829	8.33785545210971	7.78354437575391	10.8097377504787	9.13649584852437	10.8806114622375	11.0011448005152	12.3317525659506	11.5922949479212	7.19772733190258	11.5680973200033	11.1113189593157	7.96575083995558	11.8001367107716	5.72297228703221	11.6794815448317	11.9447311188376	11.1073999858233
A0A0D9QXX9:S480	ABLIM1	S480	7.01430950488787	8.51248151494691	5.5947630306858	12.6935219832314	6.7023736477264	8.84097541995735	11.6206668398572	11.478662534502	9.00431430720052	11.271283387725	7.15150353058888	6.25565372108261	11.9483551687758	7.22356253764669	4.24240242427051	13.5635922836748	11.7008952112358	11.3167166058596	13.2097115987788	10.9111697791863	8.90538282514959	14.4308911893731	8.90357614348398	8.43767433362475	12.8454273324595	12.0830492633684	11.4240573753213	13.8521532824594	12.6600765596532	12.8105653369041	7.13377735197988	8.64563955031707	6.36134708186372	14.0801303087172	13.4995830078601	14.114287853264	6.5545049920729	11.0777597671414	8.92947329866085	12.9838211426898	10.8427337180877	6.91394190588886	13.6012010061452	9.24715044283748	4.37988688859871	12.7252038859668	6.4947709113112
A0A0D9QXX9:S483	ABLIM1	S483	9.22471751279902	5.83816367463276	8.53280286552859	6.18033436247498	9.19156006585479	6.92804083899377	11.6206668398572	7.02932086246407	8.77115714155852	11.271283387725	7.40107556718278	8.83966562775631	6.32130080970921	7.48937279706599	5.89228579264831	8.42356421035361	11.7008952112358	11.3167166058596	7.53486955747925	10.9111697791863	5.5966792570499	8.49430271045047	9.00851781861651	6.77499676131468	9.23327884665122	8.24556203779132	11.4240573753213	12.0663317105985	9.21712411882715	6.58730266536927	8.28910766304889	9.10389869184202	7.83822505224617	11.7781532913075	10.684301437639	11.3004597985223	6.97523856866526	11.0777597671414	8.22186072420012	8.2916876056637	10.8427337180877	8.90396413248165	7.20555504950893	6.07209607889683	6.74377609750075	12.7252038859668	7.28582560925169
A0A0D9QXY0:S590	TRIM47	S590	12.6941100960832	14.5735387749021	14.7130772921409	10.4878861131812	13.8478543505187	13.3587016548288	7.6700875815849	14.1116017524548	14.3877866688677	13.5232771362793	15.0984500248172	14.3133097359945	9.10120601124306	11.6752934554769	11.2889115545594	11.9076789369343	13.0130434340567	12.3554054898869	13.0106693315547	13.8977935120048	13.2704246178999	13.4515349863384	14.5161688421471	14.2429111458307	6.11428929241099	12.0621962201477	11.8650546682681	11.0034078921186	13.2531246580868	12.9627740430662	13.0229520770713	14.5120808817733	14.6869782017616	12.7531033061686	14.5361159698507	14.1607286124016	10.147402667184	12.2232486181452	11.8421735042453	11.4425891840398	12.1481776902375	12.1044348924979	12.8842360603686	14.7468381906585	13.9202618624983	12.368251390897	13.1946381440225
A0A0D9QXZ5:S272	CIAPIN1	S272	13.3997870626978	12.4191398448325	12.9542576713903	11.5243038867655	11.3522445597604	11.3504112691932	14.013420311968	12.7646330660196	13.2603707586333	12.2128735667075	11.6190372281392	11.9761546493097	11.9016787115735	11.073138060837	11.3135701261764	11.8224000493875	11.2047385361824	11.5219530595225	14.1152334129348	13.276695421779	13.3623623650009	11.788689999153	12.1135094911932	11.7843525016654	10.7329195606485	11.1855472099801	11.3735968675683	12.0862696232153	11.1771442040637	10.9107130328121	14.0821843567192	12.5903282099006	13.1014544568833	12.19111703002	11.8263902299617	12.0163782937396	11.5353227787172	11.6510317486193	11.0758719241516	10.8450996988571	10.6336890674434	11.447773781037	13.4836314030121	12.7494716527086	12.7460279614082	12.3774714915569	11.912335551243
A0A0D9QY57:S259		S259	10.8234324308326	8.30051068754516	6.78513893351862	8.80536933349215	12.1055845183354	11.6818630041593	4.59638012166388	12.2457988566295	9.33209056070243	8.53864796131123	10.5717026003847	10.3436529918906	8.68763970622766	12.9380029062629	12.4564876339921	9.36450926763246	12.3284228052732	9.20637570254939	11.8025312004294	8.93496053073947	8.10799675134762	7.59005717159297	11.3098825863064	10.8762902402227	12.4109512452024	13.1963215896787	12.9938276940163	9.11245739959064	12.1866065548154	12.0447660594391	11.5278918634062	12.863758927703	12.6182569896796	8.92021571077578	11.6949923402351	7.6247290324363	9.25026537776161	12.9930949551204	12.3814893366165	2.29622723778385	11.9836731112748	7.5786833276406	3.74410906171255	11.9291509063915	11.5525194266279	7.23341854458439	7.49288028356783
A0A0D9QY57:S501		S501	11.8885504234217	11.6698504528614	11.3811955762551	12.4845378168825	11.5586360180385	12.0952254301227	11.8481939697006	11.5761819523185	12.0281113270092	11.978397847093	11.4053539509655	11.5131070492795	12.3649646617009	12.0153547919019	12.1360671333503	12.7038424833737	12.2059149808408	12.5153318075201	11.6657178551366	11.9903122195801	11.1774513451525	12.9705676854352	11.9788931103263	12.290431459527	12.2577281499952	11.7961446545674	12.2387418441237	12.8111169785133	12.128649526923	12.5050891508297	12.1854120532536	10.3574476472154	10.9297496582954	11.9723816432847	12.0369920142164	12.0596812253724	12.3990877044222	12.370770742626	12.1057308285217	12.531852463417	11.9501437434962	11.7458442401105	12.1225654826185	11.7477243372034	11.3344893898835	13.1464035235107	12.5290502483128
A0A0D9QY57:S509		S509	5.86171350512042	3.68646620167552	8.89774993690323	9.57201284494866	7.66176638580599	9.24750067896372	9.4788549153183	8.19461409266663	9.58673512758017	9.25033966345085	9.16444564500495	3.35932854452502	10.3539161699634	8.56055064040616	9.54247101973871	10.3569357389875	9.10953578510018	10.0350178143991	9.43095699339824	9.99485923152802	8.46734898146709	11.0419288605145	9.31119670590752	8.05589570578316	9.94406877879073	9.54164203300931	9.50431571071221	10.4259990454695	4.72936858844935	9.82670913905041	4.70173915423928	6.26335360135948	6.96335989086837	8.99028623179072	9.03293987032616	9.58562687112735	9.23400683128534	9.0089058609436	7.95484162309217	6.5181263486459	6.71917895887198	8.076548162755	9.21845131679986	9.37457655872999	9.42196635970476	10.7015491377808	9.93321179503804
A0A0D9QY76:S563	HPS5	S563	8.83215160129944	6.02035091929891	7.24332469377509	8.81470170134337	8.01949107292648	6.58276256436853	9.40985247800658	8.55484266607712	7.7443042517212	7.23260282694009	10.074813836441	8.82135597146195	9.23247922309373	8.15873104194367	8.35734666106381	8.35653282594929	8.4791924713028	10.8057660106612	6.57860869328545	8.00508570745346	3.81871128127877	8.39012699526481	8.08394183231197	7.9597714654395	7.7299291310945	11.3450887825095	9.0791289693608	8.72884492884953	11.4292489115333	9.18863589673619	10.023288162969	11.3440888076204	11.4403403294024	8.34617425062422	10.2702923413161	8.26958585709315	9.42903266917843	11.0294875153362	11.2554622599541	8.72828150664872	6.18442039081227	9.03921190265522	9.04340042736278	10.8875788120567	7.26274095324907	5.97058952482538	9.99839216742659
A0A0D9QY79:S250	EXOC7	S250	13.1517794914616	7.88338653917113	9.50177238341211	6.37214835907051	14.003985167043	14.1043473429715	9.23811049862264	9.17362181453407	9.19273300339998	13.4083991371168	7.36296423574814	13.3581147678049	15.0778772375014	13.9416590107686	8.25294899223092	14.789749221577	8.24453785521822	7.38848719963623	8.62798267320067	14.3335418712525	14.1608783090945	13.332116765162	7.26302124266299	13.3776150198103	14.550413564228	7.72983650723996	14.4365199511725	7.07290836517887	14.1976259166503	14.3326402086109	5.13218131770382	7.48552757731322	5.33255245692143	13.8109295529413	7.64940394893214	7.99908825932948	8.20404611753077	8.1459225157246	8.96033593207101	8.15668167310784	13.6947596338441	14.0572247402675	9.1404889360957	13.6194714580501	13.5899270719956	14.58151338171	8.22373917315413
A0A0D9QYB5:S1401	BAZ2A	S1401	7.32644670704264	11.9377610103363	12.2765154736759	7.79550029908561	12.4104052229887	7.56432660502446	3.90472001818041	8.69567076454011	3.85547004543406	5.69340490715726	6.67072368154141	7.67866081198795	8.33952855467604	12.733723096578	12.6472033236847	8.06531599140228	12.1021519392767	12.4090784676314	8.27382069383375	12.9020229112503	9.18046479051108	8.57697835203913	12.4757224162623	9.03486427618686	12.5549780913938	12.8280798869659	12.9193153867445	11.5324043754284	8.60778615039516	12.9758887130274	8.50757757017337	12.5785830314875	7.79487464325519	6.22410566185908	8.43977113274278	11.9814667126588	8.45371631894037	7.90845577852516	6.61987612562044	12.6773946037103	13.2882679709607	12.9599527001518	11.8613648558192	8.22823562024889	12.6792430506676	12.6448077916641	8.86298377831791
A0A0D9QYD7:S294	CRACD	S294	8.3071093870761	11.0945093776031	11.6660081376495	11.024494059013	11.6856241246935	11.8710903583037	11.4618073686027	12.2712538575788	11.672724881832	11.7171614420859	11.2823996347575	11.2218973461793	11.020495068668	11.8114182069469	12.0924056711051	11.1549484267723	11.5725110626735	11.6221771805723	12.1660530144193	12.2019680669126	12.1009081115917	10.956060964217	11.6205261422953	11.3742328288966	11.7937421617826	11.8212737946862	11.8572229370489	11.2700108397436	11.1502761446308	11.4367177612621	11.7918439092387	12.1593573189134	11.9105421223561	11.3043866700691	8.84775190939891	11.1747080162908	11.051187478052	11.9269523576095	11.1091289504217	11.2492666347667	11.4092248829693	11.646887660036	11.5795076379101	11.5465854773618	11.8543833298303	11.0752091070542	11.4663116203286
A0A0D9QYE1:S90	RHBDF2	S90	11.0103223160536	12.1367434146135	9.33421960958398	11.1642325811196	12.7584499994857	12.8183065827354	10.3507323006762	11.5896190051779	11.3740626028749	10.6121355771314	12.406548447245	12.2876301894727	8.71127073383827	11.0349111543123	11.1225354763594	11.8358300659651	11.6666120672126	12.2965619073831	6.31761247754823	8.33029921596387	9.28174341534184	12.5439198818682	7.81759286782985	11.8691835148494	11.4751193425929	11.8589207251066	12.2168565192443	12.1549693226258	9.2819224891664	8.05255970369532	10.7581937904024	12.695959554363	12.4444953429439	12.5255737819033	12.9589082142851	13.4362961435297	7.22941393276861	12.1234394097592	12.1384117210679	10.7703517066571	11.6644217018389	11.1657970957627	12.8273304003663	11.8593407743062	1.90886502748094	8.67247903458836	13.2257984452181
A0A0D9QYH1:S208	DCLRE1A	S208	7.54179644594071	8.77082675144608	11.7004729377452	7.22318540755524	9.29939557510935	7.70661250882502	9.11133921690012	7.871312011601	9.28959807706839	2.55338933713457	5.37137012517119	13.0673569676933	8.73679913569982	9.06663370852456	7.74201203691962	8.78218228996981	13.1931241444563	7.07915790334551	13.1774686961817	12.7822115883754	12.7234768813985	8.25622517696326	3.87223352092289	4.82553379461222	8.26665561655911	8.32329360085464	13.6387114207997	8.39300445824218	6.98835303896173	13.4940078974977	8.22952511711592	7.14777279766851	8.20238244038345	4.44574478185858	8.2136608021659	9.22236676417413	13.1617885423478	8.87832463809947	6.40393672675212	9.10866443281807	8.5439939496742	8.26933861095263	7.51353546652123	13.2422826825752	12.1756560540131	13.3667022510049	9.13359477952385
A0A0D9QYH3:S1174	TIMELESS	S1174	6.34422717782265	8.6568676741199	7.34067634514437	11.2340079436851	10.025204297994	10.3118879240016	10.4211998632674	11.0024300758308	10.2414097227142	10.9722684691109	9.92571164405809	9.54205481165967	11.0638342213187	11.0060047879954	10.6873665893858	11.4607743090731	10.4841189409094	11.0694017565711	10.5530850680417	11.1302905050271	10.2696319581677	10.8385039379637	10.1224988549362	10.4339050455827	9.20668093116178	9.92125414427476	9.91401256483896	10.4162238936885	10.100438144956	10.1441291049024	10.9728047711052	8.58542471295647	10.1257005824413	9.75252214013858	9.73643624509755	9.7843670034198	10.6760647858547	9.84241685527329	9.88345522288152	11.6078042244441	10.8651309824598	11.3250413970531	8.82507376639324	9.82549221714493	6.94203764303091	10.1755033151162	10.2190633417682
A0A0D9QYH5:S102	E2F8	S102	9.97877453388397	11.449508234298	11.365689401183	9.40625331211484	10.2099512647183	10.7992828039099	9.97618840519809	11.6788562844389	11.182492877177	8.80464821187242	5.76916695043466	8.92082402190843	10.1410503231044	10.7379389935925	10.321930277489	10.3109928911113	10.4006683100335	9.64677976053332	10.7218735827553	11.3862840059062	10.6095609851284	8.6920938763558	9.56887269656022	9.90566162972233	10.2012015185415	11.380916882939	10.9850738023504	10.5073091417133	10.955597506468	10.9904831291526	10.5243951052136	12.0261754321478	11.0849285067672	10.7095073498382	10.2182817100202	9.24972047131796	7.8657238523424	11.0498369020414	10.6994297907429	10.2447653811217	9.46745118023218	10.5584880727603	11.5780547603113	11.7185096594682	10.1290545181918	9.92320669056648	9.91000513923587
A0A0D9QYH5:T58	E2F8	T58	8.18731489120408	9.48414215028769	8.60207695117415	7.9483451598281	8.41870082515966	6.73306434338155	10.0385678627721	11.0982148366862	8.17648211884954	8.24946051610861	9.1865904094319	8.68506196088692	11.1953398189627	11.7146618990837	11.4787233923493	10.7181955737956	9.17304841906474	10.361061464919	2.25390051780504	10.89504853974	11.1543880074407	7.03734245980126	8.11587669591176	7.85708080642143	10.6313173540959	11.9925907708132	12.2078806344565	10.4662909230374	9.99483798856781	10.2947314674316	10.5475993330525	10.8662322909127	9.88650508405356	7.59041472653331	9.62863049643562	10.1018207850702	11.0551334648902	11.9860521511309	11.9412099764482	11.026927845653	10.9176563642369	10.6865550486089	10.9114353958721	10.2686600953159	11.430982892885	9.64011564942392	9.84976392125174
A0A0D9QYH8:S340	GATAD2A	S340	12.0698608835132	12.2489430309323	12.6268518904607	11.2127720733036	10.8958964446353	10.8311340333003	11.5360374637464	12.4248371894315	12.1733743584021	9.91626289129495	6.07778218165737	10.0192256866869	12.7628431270578	12.8308744978392	12.9957526947962	12.5607683196069	12.6264375564964	12.1763815657385	11.3157882388483	12.5286502874188	12.6948185804687	9.16960256608945	10.385917133159	8.976863058805	12.2577142338226	12.5394594192537	7.85179905833181	11.8545647276999	11.0874572566337	11.3856101443996	12.1844869059401	11.6050971846346	11.4408634879287	5.41907556867084	10.49158501586	10.6942860208117	12.262535987617	12.5316837013915	12.4258735636572	12.2408368521033	12.3844993710146	12.6279280232753	12.4325293935383	11.8319248809691	11.9912926095085	10.88790995052	11.1899926861134
A0A0D9QYH8:S547	GATAD2A	S547	3.67350898062968	7.09971348912961	5.47860685009275	7.80374089369449	7.65307609436476	8.85800552975815	8.69706526032979	7.6817671170604	8.07250042804473	9.00538435120309	8.31995422073197	5.37240322369045	10.6860424150055	9.20264762631923	7.37650971814891	6.8071560427555	9.40449707575166	9.15645493566802	9.26474534607867	8.12955105854161	7.50817518051261	5.80822526793206	7.86347005332536	3.54357250571717	10.7873642702433	12.1188405945187	12.1861268704848	8.9702214969792	7.8899373325945	7.01028573581107	8.75788459561563	10.4872028545425	8.12128258698026	7.27744719007576	9.19546199220458	8.89038546849305	10.0267428350111	10.6025429026643	10.6150978663228	8.01492232210346	8.44307189332326	8.56929607530483	7.92944644043094	8.85581248630719	6.66127633909262	9.01751668878385	8.58951929999747
A0A0D9QYH8:S549	GATAD2A	S549	8.04117137383125	7.25464434252984	7.35350978006659	8.37517519655533	9.96709622484233	7.7524876112021	7.88466775837153	8.87599459519389	9.28641114328833	3.33176788951497	8.24315992376385	9.00987540939717	10.6860424150055	8.00486835657269	8.50451117826241	6.77851098626117	5.63059815117328	10.0484530980342	9.26474534607867	8.02094048412892	5.56643214277393	7.87510191229318	7.22252148106153	7.78077349700501	10.7873642702433	10.8065177143763	10.7948317553353	7.9814420517529	9.19744823221895	10.0701629523112	8.24181724600487	8.76616221520205	9.2267248824327	8.95629508108524	8.26603029707068	8.74931014385837	10.0267428350111	11.6530988860435	10.6150978663228	8.44414984705797	8.56366821726594	5.92869119858974	9.06276496777632	6.59701004181781	5.5576828249044	8.51006527730175	8.13462595057157
A0A0D9QYI8:S1312	NAV2	S1312	10.856665981362	4.47193598386847	7.65241662924954	8.97679967900013	6.82904754075108	8.13121936622887	6.02293126625363	10.4452145756918	9.09780231649675	8.8998127456495	7.27806045848625	8.5026677075462	4.80803451395267	9.43139915347937	8.37604465335918	10.6695144756921	8.61670915850452	8.75131532936371	8.779597741136	9.06252760937804	9.24938966119914	8.67675820421789	7.7898379786003	4.50515062974263	10.3200806173209	10.6042283925679	9.2254184508322	8.87217619038214	8.17614041738488	8.81329737931618	7.16010765034817	8.61064571363018	7.50009584131638	8.30998520896444	8.88707630991303	6.75297612753499	9.19797155339002	8.82497917376925	6.4422062117067	8.16848131502648	9.24991345257857	4.03943715332964	9.00688125145824	8.02346905116976	8.47437787787072	8.42817759593679	8.66253741859229
A0A0D9QYI8:S1320	NAV2	S1320	10.856665981362	3.22041437657043	4.37998049153708	7.06377050729917	8.57564535112259	8.25569297473613	5.31647120707837	10.4452145756918	9.19677945315363	9.35762502267582	7.68787472202764	5.68720495765632	7.87520590538825	9.43139915347937	8.29849741132221	10.6695144756921	8.09090418565239	8.35352625418142	9.05601584164044	8.47975260187519	7.14486605479878	7.47905275662554	8.47361844507624	9.01563563280626	10.3200806173209	10.6042283925679	7.49543877468142	7.2130148720942	8.86058755020855	9.061713804819	4.26498681223816	6.57006299847961	8.50526644291354	8.69136939472966	7.66684632949949	7.48275332650248	5.08381059359157	8.01662645045008	8.55013411398681	9.25002501295412	7.29422067321014	6.5995942735832	6.18807650488492	9.05502982258709	6.17577270743894	5.72902489628919	8.87200987147811
A0A0D9QYK2:S1052	BRD1	S1052	14.5588536368616	7.87037407166111	14.4401129990689	14.746606654205	13.1453805284101	13.865557764319	14.6236714883738	5.12437489271944	13.9100931709459	14.1149671020865	13.3654198790775	13.6540564922614	14.6610225581781	9.43487926157916	13.9084843599482	14.4375953557131	13.9609141959876	14.2653055088949	14.3099507307329	12.4776782347881	8.65833994019649	14.6137078975701	13.8886378527999	13.9961101182322	14.1412972870486	13.7393251937888	9.31415338561089	14.5511163125499	13.1583649136031	13.5655552022093	14.7182339946519	13.5794612302038	13.6769169221258	14.4445398953153	13.6292009062563	14.0327804945626	14.5389072848076	14.0237935102308	14.4348647399846	14.9200041623943	9.06637810364185	14.7270341705711	14.1641052104433	8.39490180666218	14.5332766008002	8.10940250777804	7.15622709909615
A0A0D9QYK2:S1055	BRD1	S1055	14.5588536368616	5.89741908287496	14.4401129990689	14.746606654205	13.1453805284101	13.865557764319	14.6236714883738	7.39706958029543	13.9100931709459	14.1149671020865	13.3654198790775	13.6540564922614	14.6610225581781	6.54029231147437	13.9084843599482	14.4375953557131	13.9609141959876	14.2653055088949	14.3099507307329	12.4776782347881	5.27647289755113	14.6137078975701	13.8886378527999	13.9961101182322	14.1412972870486	13.7393251937888	7.44330925574004	14.5511163125499	13.1583649136031	13.5655552022093	14.7182339946519	13.5794612302038	13.6769169221258	14.4445398953153	13.6292009062563	14.0327804945626	14.5389072848076	14.0237935102308	14.4348647399846	14.9200041623943	9.37194823809624	14.7270341705711	14.1641052104433	8.62643917856611	14.5332766008002	8.05371364193427	8.61647209136302
A0A0D9QYL8:S545	SUGP1	S545	12.3732944097645	11.108073360691	8.98029025006965	7.76438338634302	12.4055816864127	9.02612737564786	12.5416537038469	12.0156735951912	11.7343561010651	12.4478855980625	11.9284384935003	6.61064208991612	12.4276875019682	11.9584807907172	11.4441300274354	12.862590835716	8.74468840521548	12.370679082329	12.6355355746256	13.0733827897645	11.7578371491372	4.64917028663483	7.57369956883652	8.92048254042335	9.21703222416975	12.6772735750083	9.03402779881252	12.6963182570186	7.73358084178059	9.44168805280665	6.10476455965996	11.939981515539	12.1303839667251	8.77845610712433	12.1378426416806	8.88685731932383	13.0625034317043	12.1387115235934	8.25892717575355	8.7228494831125	7.87896327759706	11.679560454976	5.26880960399769	12.082235398992	11.1414483239571	5.32736013382497	8.17456219066376
A0A0D9QYM1:S12	SEPTIN9	S12	12.049757403405	12.767381425245	12.9013908101344	10.4773690311731	11.6037705016692	11.4065609124584	12.636042621264	12.4757549873105	12.2594350854452	12.6282367416025	11.8957456319951	12.0605629547357	11.4894933135388	11.4580121912906	11.6838137607129	11.1469146066664	11.1978128287924	11.419910577091	13.0150776077337	12.2417018752722	12.7285719748961	12.6811262462371	13.0266740005584	12.6703618817589	12.1512773040283	11.7251209700414	11.5472833151202	10.9916691251881	11.6947716289965	11.5730343440351	13.4457413279683	12.9841878118725	12.8162705726969	13.0261439977631	11.4378627747519	11.8470063017792	11.5376686668179	11.4239726449865	11.6199827132858	7.68778092519768	11.1671976277887	11.3863971639455	12.8726506689268	12.3638206142426	12.8074121647781	12.4233430194125	12.8403806698017
A0A0D9QYM1:T20	SEPTIN9	T20	1.96217569901607	9.19137920475775	9.12133470200436	8.35381124302024	8.57862566939287	7.8387998549538	8.76335916530776	7.42527348559292	7.52731342784516	8.65066371494594	9.08456758281658	8.29891146560866	11.786539064018	11.3718624136716	11.5703569205921	9.35106525263419	10.3077925993898	8.90063640759437	7.86187517904965	8.65601723530749	8.43604554153043	7.74393045260122	8.21171536452502	7.14596299577725	11.6430974446074	8.49719455167101	11.6409794677001	9.42652501214592	7.87003579387043	7.34335354305642	6.06836419456997	7.57952677164371	8.00471257948353	7.72579019634616	8.71125751138804	9.32154797401252	7.35453896597251	11.777849313043	11.7661135357734	9.22061772216016	6.78155935180433	11.501934717465	6.91006676579979	8.59235709274651	9.30722961655827	7.20584725512921	7.17419801510676
A0A0D9QYM1:T24	SEPTIN9	T24	7.86990940345251	8.5324080763747	8.96243877939738	9.33749551113386	8.10987485443076	8.15257633559412	6.06864190100811	6.85389303061738	7.36041393934164	8.54362836233412	6.83799447533464	7.85915267142475	11.786539064018	13.0817712153897	11.5703569205921	7.75027818740862	11.8901934474389	7.63017632042334	7.16111488127924	7.68941921635754	7.37060620471798	9.28520950124294	8.56649102991353	8.58275200274895	11.6430974446074	12.7312453327366	11.6409794677001	9.02500002273582	9.16610508420713	11.2928745299064	7.09556461822975	5.46571077294576	9.31464863114246	7.33041810039103	9.16833832380527	9.07843321054896	7.35859019480768	11.777849313043	13.2377385402464	8.77966484735963	11.2477992257492	11.501934717465	7.35508758953979	6.90547456703577	8.05104445980268	8.03243746154224	5.26142141363119
A0A0D9QYM4:S226		S226	11.1770552679387	8.79039358227206	8.60142418762354	11.4756611808346	8.42229720090195	6.84318886700997	11.2929163276928	9.90426093985213	10.5515760964278	8.40382558313804	7.74884291722745	4.99991146730075	11.3742361409121	10.2363765156343	10.7996111529735	11.8079705575536	10.531941217975	11.0909318321332	10.1064823025776	10.0993778253331	4.83779517511619	9.80200335608883	9.10315314406053	9.92578781643544	11.2107022351629	7.34492804584784	9.75953684378784	11.3664630619882	9.93920996718513	10.8640128638623	11.0876901045653	9.31033875099247	9.48568516051447	4.8420300584301	9.06748892644582	9.93062376796298	11.6994419137178	10.2453100076083	11.5989286436739	11.4403935968848	8.68334283112452	10.1658676606018	10.9853094999228	9.39063504043333	8.06591636407437	10.3546567518695	9.56580428054132
A0A0D9QYN3:S94	PDCD4	S94	6.68916728700588	5.54807074717949	2.76292232195526	8.68691042387235	13.0967406400373	13.3263115749086	5.82359731290222	4.97127265518352	5.94861267472956	3.56965570289868	8.73709023042034	8.79469341951463	6.98471816480578	8.28656306680214	11.1401890340482	8.21144811708789	11.1572228254788	11.9708063842775	9.32629060188046	9.25530028983749	8.66706107215879	7.90459709399811	11.6843603280561	10.0648842324496	12.1183492458511	10.5640651032947	12.8938850885599	6.76175874962687	13.204252914993	13.1523284420176	9.25632724560464	8.84315645997483	8.33758588086876	10.8039181917546	6.57722323094777	11.983327865301	9.04357174334501	12.0959519822499	7.63400046376625	7.50743515381626	8.36509597764703	6.84581762851395	7.332889443271	8.54675753696845	8.90941969524462	10.7421190974607	11.0325187294557
A0A0D9QYP6:S201	SMNDC1	S201	8.75610552347822	8.58486711430786	8.11352910988395	8.67355948697114	8.04682833896496	10.8105440179518	6.91168153280735	8.04769272004829	5.5862039191937	9.00309174976533	6.28137982008336	8.96385756618919	10.863302996635	9.0527608416636	12.0643194098469	8.2564140843359	11.148258531144	8.70862735347553	9.0281822878332	10.2993181817209	10.4349289875786	5.05640782581344	9.26912810403832	7.78832260673923	6.3405158791055	9.29417135812929	12.3405802403639	9.00267127970524	6.02222735011831	11.2144677648332	7.99142604614015	11.8548463751884	11.8951318994623	8.22057176724232	10.0623706193652	8.29188358691687	10.1982041925916	12.7308425686807	12.246660499079	9.42986412905663	11.017325993735	4.66391090862155	7.24764810901201	11.15643077511	11.235997033257	7.15160865523438	5.70368486612292
A0A0D9QYP8:S924	TNRC6C	S924	12.5017251434076	5.95058814254973	12.1678595200069	12.4920147583177	8.9768657311363	12.1729674168141	3.69013843502454	12.7880155792954	12.7858338522282	12.4789645630397	11.7921454047975	12.2795040340072	13.2452356956512	13.1000533983778	12.662089269294	13.0549497229939	12.5765989099606	7.87463635738804	7.67836537478551	12.7549675022455	8.29972523971547	12.4955796865878	12.058068290506	12.3047944719576	7.45233899374018	12.4229615811195	7.97126593973938	12.4923143138974	12.2630767751798	12.228345494134	13.0613650426957	12.3411166065839	8.27686910116115	11.8892768982878	12.5122095467643	12.6077921129136	12.5124096474058	7.08754885862639	12.4660891757971	6.82765232222835	12.6873409844427	12.6209668324122	12.5068398342722	12.5261612720252	9.2598752306722	12.6723007501803	12.8465827869208
A0A0D9QYR9:T88	KAT7	T88	12.7053104882632	13.1164946472982	13.4667624803725	12.6160838868276	13.4537224633444	12.9476574249681	12.6884495920014	13.9304959475684	14.2204890741057	12.0983988069246	12.7018714707853	12.3937240176358	12.7536612798794	13.7604962699012	13.6004715538046	13.4211230868249	7.65176980950735	13.6856711570138	13.3311686355982	14.1575916583333	13.8246248381868	8.74418319907122	12.4100873281564	12.1782736896034	13.0842477605987	14.1549720098731	13.3157515722255	13.2606239076114	12.6293116011131	13.4024475532626	13.2522876723246	13.9619473233407	14.0874697803286	12.3777082969246	4.66799995117585	13.0277028970129	12.8500175182045	13.5553525125024	6.14967234736648	12.7870091327801	13.1750946554032	13.0305858941999	13.5600811507452	13.8774206978954	14.0638281221056	8.56321229473486	12.6591791928641
A0A0D9QYT1:S177	CENPC	S177	5.44177840450219	13.1039624142231	8.99117041171561	6.87286839796047	9.02339606720621	7.27261115300919	8.3493893388087	12.7268740897345	9.38411207541689	4.74888951222294	8.43909203967994	5.31685752233957	12.4772290618253	12.8502091551146	12.8135974582419	8.88511019975773	7.10381717358725	6.58798636425734	7.17429335347813	8.57924008627203	7.68910256791288	7.45933889567387	7.99691474749916	8.35708331688253	8.53795203613011	7.66478004913677	13.0804636853712	8.11978841775229	6.76005293770991	9.42259499729221	12.962221628288	5.74227179196871	6.25080022854237	6.52248703636755	8.92548260879656	7.79490538699085	7.01198056409755	13.2147704377748	8.50455415688831	13.1623181429075	5.27631539083931	5.17372992454968	9.08548362824032	8.05507519613254	5.4115808458843	9.27109985982624	8.08489434816153
A0A0D9QYT1:S538	CENPC	S538	8.50101272512435	11.012991497838	8.91224637466754	11.6175396081049	9.90537787736336	8.18091650666282	8.55127430449749	8.58087412984564	10.9661786851206	10.0158209020766	6.99908483537868	10.8329223166513	8.46335229050406	10.4591755884403	10.9736425366615	11.833757474132	8.13234592483947	11.396490682925	9.179894269204	11.6748543727216	12.2372929110294	7.74466836573384	8.51701824163328	6.48849755094997	11.4787751099439	11.0658273706703	11.2233805971488	11.9397576887678	11.958886664315	12.0557317789103	7.95101611563495	8.81676519588899	11.6635713225788	8.65239788739406	8.86822243618146	10.9781191698689	11.4002963027469	11.3421753046391	11.4939723456742	11.7153260673168	8.67491784758958	11.3857379072589	7.03483206163598	8.32944573955465	10.928084976767	11.1643991329575	11.4414016569318
A0A0D9QYT6:S347	SMARCC2	S347	7.62477426195215	1.90428802900651	9.44779828849507	8.61059857892424	11.9144223817597	11.0365697886417	5.69929426129909	10.1513811490544	6.79716062493521	6.59537787284551	10.3254057667651	9.16693233836267	3.73005075897176	11.1579579996886	9.91265050713943	5.79557262717413	10.9985612534157	8.49628167283817	8.08628855482731	8.35977538678102	8.65979780132815	8.1651175624254	9.10990371353246	9.0261950791141	10.3062261129314	9.92722565761018	10.5448735963394	8.71003936146133	10.9222426020411	10.1414776045721	6.2303456834689	9.96388267578753	10.0407700192054	8.44539127962464	9.75258628899053	7.7077538064817	9.45369045317756	10.0939742779697	8.99114775189771	7.03318000034656	10.8385746207939	10.5264318883262	8.64048196231981	9.99474657484595	8.8913691917468	8.08892495506776	9.00918592766337
A0A0D9QYV6:S100	PPP1R9B	S100	5.24386838868618	5.99100963743316	8.72297281739122	6.68308346904007	11.2595774538046	11.0755181614377	6.19615753429999	10.4519159108084	10.0478568664505	11.5065034196077	7.7520375023427	11.2249597318454	10.2753516895536	8.61661486234085	8.70297277497357	7.49873075883154	7.19667950668191	9.07141576315662	11.1208585686603	8.27436513889632	10.8698545086282	11.4141630297403	12.4746513561246	11.733614991974	10.9473956884607	9.05795612190607	11.1573063411092	9.46674638810763	6.51657485470579	5.94734872387936	7.10778367504626	8.68643253786693	8.8465662698116	6.92816969640972	12.7781226175495	11.8600125171809	9.34363413005888	11.0866067287409	8.80629434968287	8.49633819304262	4.93976003710899	9.39302072473265	10.5951697832382	7.28772423765057	2.27282400885356	10.898381695069	12.114070440254
A0A0D9QYV7:S1034	ESYT1	S1034	12.9888063322645	13.8452228051605	13.4335670078785	12.0298977482841	12.8923971193375	12.8143598091819	8.95900907064782	13.3054770002498	12.9688952338015	12.8960025519859	13.2213595875916	13.2174587639477	11.9790085431895	12.5232906690467	12.4324245497106	11.8644168476051	12.6633610729838	12.4484708864518	12.7963725290708	13.5023234700982	13.5584480982251	11.5007333171954	12.5646014561286	12.4758251717938	11.6355136440966	12.9836935430908	12.5891894674935	12.118202652904	13.6283382146174	13.5503200128652	12.2909421946509	13.5940848911922	13.5082903337111	12.4836155307974	12.6950468398583	12.6342693228645	11.6110681849925	12.7496467310899	12.4871372245393	12.2631275115672	13.4804373892137	13.5640061633031	12.4407901139513	13.6323666871414	12.7148843661059	12.1867463647484	12.8122337914841
A0A0D9QYW2:T388	PA2G4	T388	10.0240673607521	5.22131103576256	7.7942210931658	1.53367148435198	6.7417066688476	8.22664473803104	9.04332307115863	8.14741896920458	9.54178193583171	7.4080951793895	8.97077675666717	5.65303474339696	9.09095315337588	8.17085963141504	8.70133405436668	9.37696479374218	7.46968512906085	7.73725898583861	10.6288628862556	9.42399723239499	9.89605707856367	9.01134097559756	8.72004184565642	8.487714363197	5.97065934550273	9.26820049666738	9.75722817864171	9.34841364520886	8.01039492212288	9.43837556773004	8.63681223176699	8.80578250393069	8.78918250552536	9.17855103091048	9.3426884660017	7.99792907873622	9.11024502210246	9.2013733442344	9.88631890622648	5.57670123270171	8.40856559561989	7.73134954515728	10.3268787871757	10.1381273223383	8.80995832736813	8.76473336576781	9.35569082076061
A0A0D9QYX5:S309	YTHDC1	S309	11.9645696873918	13.2722647608613	13.0796836861242	11.538049745609	13.0041000857603	13.3408868905516	10.4499765271959	12.6188498030381	12.2732046272985	11.8563330427154	12.1981286382923	12.2935890306432	11.5133668444742	12.9339212902923	12.3104409686357	11.846672241086	12.4900938407771	11.9917665948477	11.3389508185895	11.7997018322878	12.349400881755	12.3473594299335	11.9955251219132	12.5175461180363	12.2646367158576	11.4773559759404	11.9953031292404	11.4155090530536	12.9795291518858	12.6693139640256	11.491470992883	13.6486500729989	13.2257884030322	11.7750112429668	12.7372679051594	12.7318919900435	11.7507571327475	12.3473183896411	12.5102021244336	11.9078676158716	13.0581862047253	12.4071838930196	11.2105384396925	13.092288634348	12.7365014810888	12.052951774409	12.579979057773
A0A0D9QYY2:S686	ERBB3	S686	12.0964715257351	12.6121952728241	12.31878135739	12.334035611125	12.4786433012397	12.473361138303	11.0511938826546	11.9769513367813	12.1565382262296	13.0766193470963	13.203547648416	13.004280611665	11.7290173881064	10.6799433823036	11.2729948240741	11.8976855058538	12.6541712703218	12.4101030447641	11.6904554835011	12.3337462089374	12.397608532325	12.4279888853973	12.899611732455	12.8538835235804	11.5169729720309	11.0631884955665	11.2436617533931	12.3386803310225	12.9176528358037	13.207265584993	8.80993189894672	12.1870124280222	11.9648584604397	12.2134344705691	12.8221179076924	12.9424041080343	8.49077715709934	11.2907066412321	11.2918438782845	12.6183140431857	13.7836686110491	13.6683452355454	11.6542554914853	12.44037947127	12.2102843018129	13.312881646242	14.215170422536
A0A0D9QZ01:S1096	UPF1	S1096	11.9950468639735	11.3991803293029	4.96730550263258	10.6512010181104	9.35037274690573	8.92842037138056	12.7843144197538	11.2767832536709	7.80700150106608	9.82467458018542	9.93171468171586	4.39330003328567	11.8598307408148	10.4075790231745	11.7269847931408	11.9520122672431	1.81780300043851	11.0034086561554	11.7622662426998	11.7975638641402	10.6051058833993	6.50090891830005	10.3446561284617	9.90724861642857	10.9643717169397	7.57157183289254	10.5843003206164	12.2848365265485	10.2444776557237	10.8571567670472	13.0148506284043	9.77312296766448	10.5703182434757	9.94690946864657	7.5155115452478	10.4324320942181	11.0804572585204	10.3278169451191	9.06583092914175	11.8039392775248	10.2828764454455	10.698984285023	11.9684807822305	10.7871517781447	10.8579969284735	10.539107767532	9.79404514976997
A0A0D9QZ01:S1116	UPF1	S1116	13.404001930662	7.37989809068731	12.8028649225785	2.42003155205352	8.10996591345212	8.66269497081895	12.7887751184077	12.9911170498498	5.95214139188039	3.95250171088614	8.67154830813151	11.581644168399	13.0017785220049	13.207515567023	13.0516261110496	8.67195158302077	7.96519259579862	12.5840440017452	6.84648425258285	13.4285808938029	13.3990844032787	9.3266339604133	9.12238088385191	8.06979443977754	9.16849125170543	13.7870670608064	13.5945907360154	8.29319628941964	11.9341190398232	12.1480551179959	8.01781496545705	12.77964272299	12.7517732185338	8.31093828800323	12.5515666078918	8.75934076054018	12.8221560481368	13.5019369701096	13.3080743164938	5.30980498542493	7.46656208467162	7.46536112016647	7.73706586447663	12.327897741526	13.5648738326115	12.8160328134237	12.7080441814903
A0A0D9QZ06:S482	GTSE1	S482	11.2144368664715	5.8474387468091	7.99168368630316	4.61341950159356	7.8122462425782	6.73218034738985	6.9644723474743	9.24390184753646	7.00708125568774	6.25581022118096	9.36302707524555	8.54778884636159	10.9492697368056	12.4911047036046	11.8146908228959	10.5888262058821	11.0572510467827	10.7452378497747	10.9721570898979	9.54915525230127	11.0147108141884	8.44044711254062	7.12040845632414	7.2331075890459	12.2855023566636	12.130993914382	11.4094284807826	11.5973354753629	8.02686388916549	10.5918946089749	10.6634947946153	10.3711469603333	11.4189361357284	9.30273601515705	6.47507289550804	9.00745284215636	11.4578114225675	12.1197329528365	11.3294030880628	10.2976343727377	11.3875663545063	10.2408947110699	10.6981299381107	9.40758235041922	8.26407753724354	7.64232919740448	9.37954555129014
A0A0D9QZ06:T487	GTSE1	T487	11.2144368664715	8.47126909922075	9.05363438091049	8.20495901080139	5.53914086138397	6.4828965442544	8.72117262524576	7.28105935880129	9.24073487650541	7.7610988899942	6.87743864939532	8.93182804822282	10.9492697368056	11.5265816882423	10.4067817026837	10.5888262058821	11.0572510467827	10.7452378497747	10.9721570898979	9.54915525230127	11.0147108141884	7.24510412143549	8.58583876639167	8.8485130890339	11.1503632688327	10.9412960212421	11.4094284807826	11.5973354753629	7.04668191922132	10.5918946089749	10.6634947946153	10.3711469603333	10.1231075095472	7.27889028319461	7.30883928742387	8.30181256366656	11.4578114225675	11.2722220012078	11.3294030880628	10.2976343727377	11.3875663545063	10.2408947110699	10.6981299381107	6.9779547605252	4.08137216989631	8.17430612833748	7.9961107602697
A0A0D9QZ27:S639	RBL2	S639	10.9522419957619	12.2765551678621	11.7637836591595	11.9041535991705	12.0019603553111	11.789560774605	11.27478348754	12.7414473762966	12.2132556952659	11.2687907938491	11.8189178704701	11.5413298867282	12.8072299092916	12.633160956061	12.2177700092608	12.4524515408578	12.3271188763648	12.1146800644964	11.9851857892148	12.9087376856839	12.2410099986862	8.41478626474267	11.4233492086504	11.148213784076	13.1175096774821	11.9634134026845	12.1247953001177	12.1491668520611	11.725208865737	12.1457735846331	11.2824836647017	12.748764246198	12.8281974096103	11.1329421826743	10.64653829396	11.3889105851389	11.939513189096	12.7533010699038	12.7479018196331	11.4868874730274	12.8305708258558	12.6881561287304	11.1643762104863	12.7912793686595	12.2441298428074	11.6796228623557	11.6097447705604
A0A0D9QZ27:S662	RBL2	S662	5.03758597058676	11.4904056115367	5.25103973495603	8.87798317974552	11.4282579407354	11.3036994969358	9.82516345236125	12.0527371679729	11.3329503292777	9.41868722700075	9.06205624353311	5.29882919775011	10.9507590888466	9.15159261311265	11.3519299077156	10.8788146467646	11.7371445171841	11.3139316764278	8.55193856139158	7.70733618292121	11.1956310838208	6.0181629428501	8.30947013368065	7.81606592188953	10.9290143972246	11.7437668543648	11.3193469888503	10.8397077835724	11.6798728505424	12.0264767035744	9.24110185585935	12.0865357533887	8.46051531858744	8.49326306625084	8.29586569061869	9.59898039114872	6.66296166567547	10.8834273439996	7.10326817594043	8.35145831855715	11.1917083271836	11.049482551363	8.10927840514087	11.5666616572886	11.6978350767319	10.1733208865441	8.61652450014984
A0A0D9QZ27:T642	RBL2	T642	10.9522419957619	12.2765551678621	11.7637836591595	11.9041535991705	12.0019603553111	11.789560774605	11.27478348754	12.7414473762966	12.2132556952659	11.2687907938491	11.8189178704701	11.5413298867282	12.8072299092916	12.633160956061	12.2177700092608	12.4524515408578	12.3271188763648	12.1146800644964	11.9851857892148	12.9087376856839	12.2410099986862	8.5596544816177	11.4233492086504	11.148213784076	13.1175096774821	11.9634134026845	12.1247953001177	12.1491668520611	11.725208865737	12.1457735846331	11.2824836647017	12.748764246198	12.8281974096103	11.1329421826743	10.64653829396	11.3889105851389	11.939513189096	12.7533010699038	12.7479018196331	11.4868874730274	12.8305708258558	12.6881561287304	11.1643762104863	12.7912793686595	12.2441298428074	11.6796228623557	11.6097447705604
A0A0D9QZ33:S780	SLK	S780	14.008225724443	9.13984874217585	8.94010297090815	13.4504420317842	9.13975456604283	12.6869309694923	12.7890975688636	3.36849905292241	12.5970182709671	8.21190296648877	12.5608442430982	7.61403100652337	12.9885596970704	9.28981336489783	4.81679631880222	13.2950468943317	13.4436731997005	13.4998296722883	13.1755873148579	12.6499534862517	5.0924192527964	9.03805330594362	8.19631632713137	12.9258180456265	12.8309824968908	12.8549792930216	12.9922738654836	13.4097531763652	5.65187271663868	12.6180032378473	13.5851082640426	8.489582826551	12.3325785553405	8.85238509304838	12.8202215235214	8.88550522471038	13.4002692203779	13.1001790245919	13.4303164637308	13.8392519165168	8.83162848316911	13.6101245630243	8.54662923044577	12.2926242152432	7.10665692880224	13.4774863201743	13.0581653863995
A0A0D9QZ76:T293	KIAA0930	T293	10.5700834158323	9.10086345259473	8.20255263574304	7.60440247749015	11.9359337577561	12.145680660628	9.43083441592202	11.8776252906124	12.0113392727097	11.7654994580934	11.6570078239414	11.7015767632758	8.35948408593148	11.8127119622026	11.7177682221183	7.71935750886666	11.6186108624315	11.8397693495297	11.4534645885369	3.50814981292696	11.0632830163423	11.4290466357526	12.0433489563042	11.7331558528805	11.4181769015813	9.05601935113268	11.3080829849395	8.7787034082738	11.7796340604095	11.9399237858793	8.68640001882763	12.1140561174953	11.8078808805889	9.23670942049955	11.5806654050099	11.9806432404177	8.39076921953067	11.4129050200363	11.6890237415631	5.10759924581919	8.42233859787282	9.13339981792226	6.74782221660701	11.8676882174969	10.5628477882486	6.214611731839	11.0170659661979
A0A0D9QZ96:S222	NUP50	S222	12.3184722592511	8.1636878052793	12.3943405608767	12.7546606198256	7.68959043609493	14.2702080506196	10.8590195541041	8.38886934324688	11.8529464767294	14.2856757153912	14.4353037226073	14.5302093714135	12.3688756935026	13.1851161625264	13.2125279866482	12.81435636777	9.1569430632837	8.75690219158669	8.55924489664164	11.6875995471196	12.0268368147654	14.0458983142672	8.22331825900459	14.5733723859833	12.2662721246673	9.45953659587945	12.6019413233004	12.8376670946424	13.871814623419	7.64160713336326	12.4911032045704	7.09292265575331	7.8324576033595	13.3247401069955	8.97126593264605	14.3315571560457	9.29873480371757	13.0043768747906	6.79020114531269	11.7875888690317	12.8592266526214	12.7153962122197	12.8953603746145	11.9042402207614	7.37168810874838	13.2771840423945	13.8802658211241
A0A0D9QZ97:S547	TENT4B	S547	3.8888715636796	9.50659503345787	8.88172704355878	7.09378937386153	10.7758343482757	8.52715399061637	9.17846972590919	8.75457183274997	10.1581281468727	11.1529993718201	11.0351066672901	11.3508684524684	9.07819381810568	9.42881869522787	8.04662898905915	8.04675793035096	10.3523717407597	10.1897817992905	6.84321133030889	10.0378704467237	6.62844850656262	11.4057642458113	11.1449444357632	10.7781388246921	9.10574653734798	8.21982893592621	9.15173311266911	10.2903022953813	10.6353207876502	10.6072398763378	4.384755877188	6.71768493031583	9.94173433678846	11.2413196583224	11.2275038677021	11.2805679762849	5.14114916547099	9.39413382038738	9.56337915707452	8.79201455669248	9.51615710551073	7.54259972335264	10.5067709889718	9.6397259163712	5.59861004116576	10.5516539760724	11.1394642874566
A0A0D9QZA1:S372	PRR5	S372	9.05697228593545	8.63926035002983	8.39045519233756	11.3146136480774	9.39224337017815	10.229088007805	10.1358313056992	5.41159802748577	8.02320338302339	7.29554333635483	7.45500286176442	8.84143135532287	9.93259346819909	9.15569255318936	9.79151534128407	3.85186052393407	9.13553834394367	10.7599840658234	8.82442881235945	5.37812638294146	6.04382188151166	11.0496213691521	9.99860293617702	10.3225813600098	9.51009959083425	8.13951592176631	9.23389776417455	10.2892210830949	10.0065157404542	10.2730256448598	9.42819917219697	7.79758843327843	8.68675038652284	5.13049662998636	10.2905596627081	9.81255909841732	8.79277376467858	8.49828953175173	7.59312867709505	9.97303178779448	9.31074475140458	8.98740720857286	9.50823487636923	9.71287414058277	9.8613726479425	10.9222714301302	10.5608948706868
A0A0D9QZB1:Y365	PIK3R2	Y365	10.2405718671191	10.2789618755673	4.36270377264414	10.4112338853246	10.9149338096257	11.1655574414542	9.43804469931037	7.88127743723165	10.8464193457814	11.7862499471526	11.508685765721	11.6968898827302	6.95036911674925	8.03457922181835	10.4387780473113	10.870719919916	10.9627971959744	11.08314999824	11.6243345909879	9.40609566591257	9.00822255358824	11.0295314250278	11.8649910227029	11.8230522296841	8.83414699415924	8.14333366001575	11.1522390534722	6.51084641950022	11.0537736101467	11.3852520487899	10.5597333973703	10.938030153674	9.38679585363407	11.5477240966587	12.0739104628411	11.699888012415	10.5403069370374	10.9552485110883	8.62615020134694	4.32399224487783	8.07040177790242	10.3256301687199	8.97761085123871	11.6659867199169	9.29884895379685	11.6189907651694	12.095029058753
A0A0D9QZB8:S83	EME1	S83	11.5725659439262	11.2671322307589	6.59754766565496	12.6470293254	11.2435250827837	9.06023403349081	12.7692072974766	11.1811216109618	12.42891913604	12.9096466240305	7.96358310337044	12.0012619473572	11.0843648003656	12.2455475100199	12.4821520264676	12.5749658028675	11.0870151852147	11.9659075635367	11.8719648894566	9.89680473337917	10.90423853299	12.0660769055637	11.9745797738448	11.9096601712539	12.0257824833706	10.4993145098495	6.40492790745439	12.8421762700464	11.8779919876891	12.5001180252347	13.0808379013362	11.2360032110421	11.1730302693919	12.7849371774718	10.7124426234118	11.9012145514426	11.5083741512645	9.53882272181231	10.764467377109	12.5185897370945	11.5525002021299	12.5738620387499	12.1987540059022	11.4507235642949	12.1933274256514	12.4324382355366	8.24803912001678
A0A0D9QZB8:S84	EME1	S84	11.5725659439262	11.2671322307589	7.34747715891628	12.6470293254	11.2435250827837	9.06023403349081	12.7692072974766	11.1811216109618	12.42891913604	12.9096466240305	7.43078563333739	12.0012619473572	11.0843648003656	12.2455475100199	12.4821520264676	12.5749658028675	11.0870151852147	11.9659075635367	11.8719648894566	9.89680473337917	10.90423853299	12.0660769055637	11.9745797738448	11.9096601712539	12.0257824833706	10.4993145098495	8.52109797980154	12.8421762700464	11.8779919876891	12.5001180252347	13.0808379013362	11.2360032110421	11.1730302693919	12.7849371774718	10.7124426234118	11.9012145514426	11.5083741512645	9.53882272181231	10.764467377109	12.5185897370945	11.5525002021299	12.5738620387499	12.1987540059022	11.4507235642949	12.1933274256514	12.4324382355366	6.96039294495398
A0A0D9QZB8:S86	EME1	S86	11.5725659439262	11.2671322307589	8.93522516830457	12.6470293254	11.2435250827837	9.06023403349081	12.7692072974766	11.1811216109618	12.42891913604	12.9096466240305	9.39843183098591	12.0012619473572	11.0843648003656	12.2455475100199	12.4821520264676	12.5749658028675	11.0870151852147	11.9659075635367	11.8719648894566	9.89680473337917	10.90423853299	12.0660769055637	11.9745797738448	11.9096601712539	12.0257824833706	10.4993145098495	6.70310394850666	12.8421762700464	11.8779919876891	12.5001180252347	13.0808379013362	11.2360032110421	11.1730302693919	12.7849371774718	10.7124426234118	11.9012145514426	11.5083741512645	9.53882272181231	10.764467377109	12.5185897370945	11.5525002021299	12.5738620387499	12.1987540059022	11.4507235642949	12.1933274256514	12.4324382355366	6.38163819923514
A0A0D9QZG1:S14	CBX5	S14	11.2328045509091	10.9779191569404	11.1222786593145	8.93780599620946	9.23261083054064	9.6662623541412	9.37335128241945	7.438277304886	10.2900923930182	9.12797736201932	8.6882037129485	8.17188602359045	11.0590079686084	7.22432503754033	10.6197124448428	7.00612104721132	9.97553438523727	6.57649011387348	10.2509829623378	11.0392380288386	10.3154737992242	8.11560562551221	7.56928893554442	9.25779799534222	11.61113751949	10.9855471918945	9.07968091055816	11.8624401488356	9.90562032451274	10.3849857184889	11.428773450106	8.47390040646727	9.28127952427502	9.20680627101431	6.80210517583223	7.22223309573353	12.2116482015438	7.66508676355313	11.5603624971438	7.17743786291645	9.66447836639687	9.19264837854	8.019442562694	9.20780733608165	6.70362911212346	9.35325787478224	7.74115954299462
A0A0D9QZG1:S92	CBX5	S92	12.907488967934	11.3766718809503	11.9249252604483	12.4988422845208	11.1716403425583	11.8495654392046	12.727516924461	11.1678007265089	11.3408310243428	11.0914401966004	10.6194072843021	4.03503401775605	13.7887929620431	13.0963909137299	13.5461261748987	13.1199557111929	12.1407635941297	12.8114160551323	12.5752810710704	11.8825930591749	11.923742849892	5.3814438894891	11.1155060128049	11.2216670489031	12.7004036127628	13.0513890475967	12.6104541536462	12.2837461783341	7.1752807461058	11.617442852524	12.5285420956822	11.127411217886	11.5091313818617	11.2432394789155	8.79577519805954	7.78138065219065	13.6804286789787	13.4079016913171	13.6889083132484	12.9531382729246	12.4470487966058	12.9350878843005	12.1902143456331	11.1859545623955	6.8048670959948	11.5362335151936	11.8205678443576
A0A0D9QZH2:S1299	GBF1	S1299	8.41554926116472	9.41290511496417	5.89728652919932	8.48684179501819	9.11109872514899	9.2917388902586	8.84604904524875	9.19049417915876	11.66297604286	12.5218256099912	7.91067566854468	7.44254436623221	8.0589667390715	12.0971934769346	12.067287423396	13.1448085254878	12.9317490082641	12.5920661872869	8.07747985693971	9.40287656109903	12.7048916212341	12.5199480137399	8.4853884755854	7.11695802293726	5.55118843581796	12.6937258432282	8.62909436986671	6.76241329036014	8.31249580103021	9.23065881555798	9.03102327095572	7.51610765444438	11.8787947334665	9.41575293998327	8.75542328242558	6.22934879740571	8.83874053051764	12.6646345424252	8.71124849770213	6.4153505757228	9.02572462580695	8.4606573896985	13.5156089872793	12.3546104266799	12.275856578679	8.31572189693822	3.69263136174504
A0A0D9QZH2:S1781	GBF1	S1781	5.44909433222249	7.47469798197243	9.0208344651581	8.73566095452281	8.98257680585481	9.38911279794544	3.06947693605812	6.63435985678662	8.42880929856951	8.89105104472731	9.44335522017257	7.63412062727643	9.12800899194237	8.5604001113215	8.74608852258514	7.08975004366082	8.70240615590555	7.22430743976489	8.74302703056347	7.8202741163249	9.09922733475917	9.41435119440648	8.32368881385857	8.92018894812377	7.95771804167717	8.73136076753413	6.99527498184962	8.4648910646644	8.01842021476489	7.40847175161387	0.228258627052936	8.77231857833806	8.76989501578183	8.40953015530786	8.73171514495705	8.8243915952147	9.2913775033159	9.06434959876804	7.06257750930181	9.19010499439418	9.2159166827912	8.93041216730142	5.86390653262313	8.19219924566737	7.71269669769917	9.39353164270573	8.93208188958824
A0A0D9QZJ0:S810	PPRC1	S810	9.10551684884464	11.8354173428886	11.1920549017902	5.8994768776171	9.40596844136067	6.42388710898131	11.0978587383369	11.806619241317	7.31120574165496	8.39810696964151	9.3656660700715	6.23224472558996	9.25225524772463	11.1251602699664	8.05385630433441	8.72757442814542	8.55967802709153	8.28479538664968	11.630318968963	11.2601376900792	11.6549443674231	9.10942857393411	9.03490466654884	8.89014674819017	11.4374273366129	8.37190827937962	11.1028301572998	8.7400481217674	9.24058539215365	8.10557825556696	11.3789824331149	11.7635804639381	8.13710335106229	5.07411042302061	7.53774497447667	9.30334159641403	8.20536497626159	11.4145547456943	9.29008781758617	9.28905259268392	6.90246048309772	9.29271088246791	12.197791559838	12.2301449208733	6.35130219348316	7.70146732032653	9.94301526439934
A0A0D9QZJ0:S828	PPRC1	S828	6.79670966913624	11.8354173428886	11.1920549017902	8.3535352089647	8.90188888241292	8.55051977486277	11.0978587383369	12.3830007741844	9.70323444350848	6.2361699632204	7.72778903580717	7.70139371905009	7.65801236625905	11.1251602699664	8.77766639365515	8.1050022003509	7.71663304557378	9.33038686118818	11.630318968963	11.2601376900792	11.6549443674231	9.28869338427633	5.67848568666126	8.57266455629112	11.4374273366129	9.297472182253	11.1028301572998	5.39266450991031	8.62377974206142	8.50182797437242	11.3789824331149	12.8628330677918	11.5277899264812	8.3114278718315	5.34151131647805	6.0364366324988	7.04896478122495	11.4145547456943	8.01683427817381	7.70256992321535	3.67976553002753	8.28788458894213	12.3496815412993	12.2301449208733	5.74106052468818	6.85681284355457	9.94301526439934
A0A0D9QZJ1:S336	TRIM44	S336	10.605938019468	9.97519025586891	10.8860805814332	4.44939044149206	9.79319885825514	10.0891578633553	5.04348211214623	8.60928509926891	9.8778768875125	9.26032322193531	8.43523554914178	7.23798666547849	7.20186177851655	8.90419673444834	9.69906406703943	8.76680711303989	10.4610499938688	10.2699619410316	9.92909184814189	6.49760026763068	10.097804908467	9.17735265727226	9.42866226563695	6.22438704204872	10.5649439816114	9.32399134915276	9.21516100081874	10.6892557170986	9.64468522949947	5.84888747094745	10.6267159238401	8.03706059032904	10.7382043218069	1.9651287722379	9.49401335102696	8.97041523034925	9.09216848451389	8.16401762358928	9.83236580800056	6.28387777924439	10.2963261969205	8.38716550075034	9.20105776424752	9.38423699908799	8.46336685325866	7.13935400464883	10.1719372327739
A0A0D9QZJ1:S339	TRIM44	S339	10.605938019468	9.97519025586891	10.8860805814332	6.58891698171751	9.79319885825514	10.0891578633553	4.23252346831377	8.63196518170334	9.8778768875125	9.26032322193531	8.43523554914178	7.91304009412612	9.04512885794014	9.19022199799009	9.69906406703943	7.26593336617044	10.4610499938688	10.2699619410316	9.92909184814189	9.29079488997403	10.097804908467	6.64579082127991	9.42866226563695	6.90577125512601	10.5649439816114	8.73312348577764	9.20816983368926	10.6892557170986	9.64468522949947	7.33515428895171	10.6267159238401	8.03294172997671	10.7382043218069	8.49200859960636	9.49401335102696	8.4258717361677	8.98381023125814	8.16401762358928	9.83236580800056	7.26407583545601	10.2963261969205	7.30128233808191	9.20105776424752	6.96091983923786	7.80118334282309	7.17207115584287	10.1719372327739
A0A0D9QZL8:S464	API5	S464	10.8345713927238	6.95622891064252	2.46155697691093	10.811296214087	7.79624014757105	10.6991157994087	5.38602496212262	5.30209831256569	9.68370204970996	7.16305452067236	6.64545807576073	8.74931034046274	10.7777937347471	9.40170270962774	8.95897734467734	10.8551668030206	9.91439491970385	10.3792366983669	10.8728896850038	5.81546936847333	9.17360110613181	7.7108492637943	7.29271756971298	8.51608453381555	10.8378735837511	7.26494307528132	8.14698958741188	8.93428960935059	8.81297913646329	8.31388168585517	7.9606334582628	8.2131918277601	8.50617801084056	7.93008495667985	9.85836498515815	10.1253572142787	11.1228894792639	7.88497023535858	10.4541372652775	8.86886745973445	8.08690479264779	10.0213378997636	10.4904535273691	7.3312746399587	7.72793129696399	10.5093971214613	10.4125169225092
A0A0D9QZM2:S321	MAP1S	S321	10.6767547372479	7.6753970331561	10.822971018563	10.2239621509119	9.67627648446909	10.189274243207	9.74836263342349	9.34395064520216	7.10031064689766	10.7516009340193	9.61519789384058	10.6543974493631	9.78873338135464	9.21817236900907	9.40488531402437	10.5679259689158	10.3142266378756	10.3491705095082	9.34266227141674	9.5633975010038	8.73741376449822	10.9626042256809	10.3954442754738	10.982374019129	8.98567249980509	9.96005140511331	8.86206126203789	10.9052289117017	9.83105172840348	10.3864557396359	10.363501166477	5.89054118139634	9.08274981344845	9.78092588131609	10.4132415789362	10.6875035237165	10.0998385411754	9.94077131919205	7.47571410948702	10.7616196516468	10.0731018952819	10.082121280303	9.14501212678569	9.84899707261749	10.8731869938069	10.9520790126737	11.0832024978514
A0A0D9QZM2:S733	MAP1S	S733	9.69859590053624	10.1670246993049	10.7224553860876	11.1745070115612	11.4416022548737	11.0231520887171	10.5203606900807	9.50125653945918	10.3002025448279	9.96151477537452	9.30468488150173	9.6979014212754	11.1499883504995	11.0202399781249	10.9616189058443	11.9700372820438	10.777157464364	10.6880434035849	10.2620905287216	10.7618590709795	9.37162175364631	10.5283214025117	5.92586114662075	5.45814820442912	11.9498935236965	11.738553305846	11.2837491411173	12.1854314156844	11.9462573053269	11.4997438937918	9.87417650529364	9.59253858536537	10.3584917403984	9.90068350900805	10.4930276692976	8.40822953996175	12.5891298882816	11.4931145591866	11.2372138185681	11.6449995973389	11.1571094952428	11.677435434233	10.6484844091914	10.8369601774063	4.69303124193139	10.6651407961484	10.5912216011651
A0A0D9QZM2:S735	MAP1S	S735	9.69859590053624	10.1670246993049	10.7224553860876	11.1745070115612	11.4416022548737	11.0231520887171	10.5203606900807	9.50125653945918	10.3002025448279	9.96151477537452	9.30468488150173	9.6979014212754	11.1499883504995	11.0202399781249	10.9616189058443	11.9700372820438	10.777157464364	10.6880434035849	10.2620905287216	10.7618590709795	9.37162175364631	10.5283214025117	8.01500920556337	9.15843112339123	11.9498935236965	11.738553305846	11.2837491411173	12.1854314156844	11.9462573053269	11.4997438937918	9.87417650529364	9.59253858536537	10.3584917403984	9.90068350900805	10.4930276692976	9.2201186013638	12.5891298882816	11.4931145591866	11.2372138185681	11.6449995973389	11.1571094952428	11.677435434233	10.6484844091914	10.8369601774063	6.36287881938994	10.6651407961484	10.5912216011651
A0A0D9QZM2:S763	MAP1S	S763	9.31140325031068	12.4537599079543	6.53446923081479	12.9194698047677	7.88558842475708	13.9901612688267	12.8986949007974	8.13624422280866	8.15435307042529	13.5864731752684	5.13643382393641	14.1629237805312	13.0588620997744	8.57763253355186	14.2593918087953	12.753829031488	9.0434404187616	7.79713632850283	5.21046543781618	6.94427379629081	13.0892790712297	4.48102017529413	13.6284275026526	7.2477729310532	6.4710391178392	8.52945703343703	13.4724107928721	8.57601619574516	8.83915895372674	12.8473183180492	11.8424921192276	6.42918883704236	12.708572864373	12.9723878483779	6.48918064937182	12.7875122892094	12.0767219331636	13.5211784725951	13.4734706208473	6.1535341646967	9.11021862217051	6.40588635861063	9.36513981899159	12.9029826644627	10.5470765041247	7.53149935525949	8.94799929534029
A0A0D9QZM9:S183	SPAG9	S183	13.48701123021	12.5857426862106	12.1294245626725	12.546747137443	6.85170733730003	11.5414797720177	13.3040520681898	13.2647930647012	12.2266864723075	9.05750605866689	9.75616586403837	8.71452288503717	13.2041157544717	12.6280794556333	12.4582393216348	13.0473262943771	7.97468811088647	9.22546590130377	13.1061999735773	11.946906037498	11.7716648174368	10.1780684838026	9.0021569429918	7.85346328530901	13.2193613637458	12.5764033373062	13.7308856290579	13.0267087518643	8.96443332439733	11.2835406320483	13.6711666815502	11.1311373237597	11.5413687286675	8.45144566962229	9.03651600335874	7.16533909710269	13.6990521788465	13.1044887311262	14.1206781323441	5.63318627683031	11.8454279412973	12.2743921943662	13.9645387563891	12.8310272438537	8.05817570012763	8.84287969513085	8.58348925450298
A0A0D9QZM9:S185	SPAG9	S185	13.48701123021	12.5857426862106	12.1294245626725	12.546747137443	8.68239226676052	11.5414797720177	13.3040520681898	13.2647930647012	12.2266864723075	7.77265656868127	9.75616586403837	7.57509726838756	13.2041157544717	12.6280794556333	12.4582393216348	12.3638689848311	9.33076284594366	8.99635352558187	13.1061999735773	13.8527875272679	6.36360248102847	8.38787943224647	7.13155638554474	7.28547639983761	13.2193613637458	12.5764033373062	12.898897123262	14.3285097281473	9.40168899498845	8.9468910040938	13.6711666815502	11.1311373237597	11.5413687286675	8.72862698760088	8.77517326872984	6.5887640005254	13.6990521788465	13.1044887311262	13.2812267808784	7.75849749887371	13.6010242989439	12.2743921943662	13.0584801996058	11.8147625203588	13.3760263977554	8.98175171181519	8.62752877246134
A0A0D9QZM9:S265	SPAG9	S265	9.35247018889551	10.2808901675297	7.38820506022138	7.47182044383792	9.34503640446481	9.04107536898104	9.92186699490771	8.29471728841201	5.99056801659682	9.36822933675249	9.19799885044104	10.292707366839	8.1965740883835	9.11006622667367	10.069875556075	10.2795851476893	10.3885038282177	8.93958706271793	6.40415094176479	10.32114273292	7.50055841242835	10.5895470681119	10.3206317457484	10.4744690104267	9.56932869287446	9.56948156635168	8.98187727154355	5.85738251476982	9.79170006589991	10.2143338640119	10.0385739105584	8.84058040051005	7.56129125861954	8.47668022555539	9.42695348129461	10.0914434323392	10.7279582096549	9.69810842509532	10.0637588528237	9.8103167394252	9.91590648379116	7.99382183229287	8.34929270054519	9.46627647669566	8.85161897231175	9.86773358290065	9.92000622387543
A0A0D9QZM9:T226	SPAG9	T226	14.1965427806896	12.8258827188817	13.1527488243788	12.6523644220746	12.3031818075725	12.5435298135132	13.928271596515	12.1473945811972	12.7132537373021	13.9458189374736	13.855100880319	13.9475549248902	12.7132955582845	12.426504242575	12.7633440445733	13.1727177711921	12.9463530570002	13.3028102046452	13.2547276761407	12.4708323436477	12.9869204709475	14.0647882873701	13.4003281476932	13.6965496366629	12.022455600658	12.5234840764754	12.3106744035319	12.9282149102008	11.496667708251	11.8968917051503	13.6797940448051	11.8690770161407	12.2078863713664	12.5543709204784	13.1935537530494	13.2324407416706	12.6099077029395	12.421675388635	12.8394661085161	12.8405461560551	12.4874861396322	12.5726526248228	12.9272336905295	11.9842888867945	10.9291851324015	13.4688969209261	13.6491786223514
A0A0D9QZN3:S120	NME2	S120	11.4938893525389	12.0175928117858	9.04429913387991	6.80027118678643	8.42090824759924	11.4899569567303	5.07307654758806	4.35154270262642	4.22317052377378	11.0440558096011	8.00999836082308	10.9878383594227	12.3885547013643	7.45315971555732	12.3251072236272	7.6553907136014	12.0284216848117	8.95957737127314	11.6581865506457	8.4249318093199	12.1155179794503	6.57178257396935	9.27799018690801	9.16965811045353	6.74104486004943	9.41852755181653	9.35956498499174	9.46892838379928	8.87169930750071	4.2957573322004	11.5853307243168	11.6692520190208	11.873808948271	11.5335374910506	8.78150428155564	5.63643904377547	9.21973239224005	7.67194075524644	8.2439059729155	7.87447479379489	10.1916011553087	6.89791214713824	7.03668754818143	7.87544293664588	12.354558272924	6.86315572013252	12.4754269678745
A0A0D9QZN4:S20	PHKB	S20	6.61803196235086	7.86986661770015	9.28658888520646	7.97927257421762	5.33832204642864	8.11735046059668	7.8140853112628	6.35972556977344	7.94812831416473	12.6652870231608	8.51912790013564	9.30939831402931	8.87729220766156	8.93064869797947	5.88215191399418	8.98704075468692	11.2405959452836	8.13284837165223	4.35554740728431	9.24774539713824	3.7325274763641	8.82311118184602	13.2028588021297	12.8497882326161	6.75149234029109	11.0027218694323	8.68936796944877	9.14871203863129	8.20851730086686	7.49935106933209	10.9920568107973	8.14713679092326	10.7490878348744	12.5699761781312	12.8608285994748	12.7460348199911	9.43650874870531	8.75041238505923	10.2204623401309	8.91445340367895	7.48593139377425	7.16990302320619	11.2744862118693	7.52517165139426	5.81746665738144	11.9324986656895	12.5574669903175
A0A0D9QZQ3:S320	TOM1L1	S320	12.038950744011	12.3554976134489	12.3169724824132	11.1561172531153	11.7133497445398	11.7230553949212	11.5027505025151	12.5961590794208	12.5785009450643	13.0235578312564	13.0946018989822	12.9809110046954	10.1732859169523	12.6171597670931	12.6261370918407	10.0030731607451	12.3719934392491	10.1726925202288	12.3925173227622	12.6465572723064	11.9438544449696	11.227315969571	13.4025198293156	13.3627665862219	10.5579759375254	11.5859229974529	12.7560240887245	10.2870883782095	11.8871101166618	12.2385063718334	12.1442829064689	12.6031107631388	12.6690952878446	13.2362753853056	13.3773559285482	13.2407164078322	10.8117662876474	12.8579432394248	12.5443517374583	11.2360417304453	8.60983201375722	9.68124572751689	12.9217185756314	12.6051222306504	12.0992923200934	12.7268148975494	12.9390658685547
A0A0D9QZQ3:S322	TOM1L1	S322	11.8990359684623	13.1832896074984	12.9042856464001	13.087838921577	14.5077763755536	14.1293753800707	11.8374346335589	13.7615828670653	12.9633989440791	13.2357987289212	13.6608980650504	13.2546202798841	13.701598213932	14.0224699328232	13.8578849098506	14.1227938765422	14.2498581030929	13.7799976337916	12.2605941268382	13.4411541204896	12.7623303461345	12.4210900343141	13.629738097969	13.3764689287749	13.9193441536528	14.486731834534	14.04179722479	13.7942873437984	13.9173117492744	14.102955059339	12.1762531373103	13.2683650390213	13.5221991581578	14.2003824515143	14.3587701629401	14.0291561142318	13.3838041974866	14.1955488672511	13.8818565017136	13.6329577627591	13.8679819152015	14.3728148092356	12.7506147607204	13.4667277605167	12.5372729457774	14.2627290459338	13.7705819857205
A0A0D9QZT3:S1003	TNS2	S1003	4.89652618320867	11.7489227852928	11.08551270734	10.2895153563819	12.2098595163349	12.2880321430846	7.74442153758778	11.7735456492188	11.3969773903692	11.4178095919862	10.9594884077875	10.9128125204739	6.7529676745756	10.6344391370898	10.3208234946801	11.1258967319017	12.157173725605	11.1450133637411	10.3100601504193	11.117117088499	10.9802188357053	11.2115810227621	11.0136991853223	10.9771833164841	10.9672412142481	11.2512669573755	10.5546477253836	8.6631000995158	11.402259663097	11.529709750635	8.36997773809479	12.3980523318208	12.0265465135913	11.0330364379054	11.4914647311124	11.2320894538911	8.72418483382812	10.6478919768175	9.81740752569501	9.50728367266034	11.6912427672861	4.56666521292208	6.17811973387907	11.954037861605	9.17829868258523	11.241148340873	10.891641533727
A0A0D9QZT3:S835	TNS2	S835	2.78012184619855	11.9239232380456	5.54793478757251	8.84528586921426	7.03940256572225	11.7256704924474	9.55057433622355	8.90174772238967	8.05513455075547	9.32194668793798	7.40112239719322	7.09323146815576	9.02800306195483	5.59621991484246	8.52440620832279	6.55064490815367	8.2567730532228	11.6737076164542	8.45468163786036	7.68355015692791	8.84454000165663	6.38068391156164	11.5608301517987	8.31610826886531	8.71203160396592	7.55323322263115	11.1378159811508	7.1001274426222	5.23951108579687	9.0134237233058	7.05981768310578	7.70327634001646	8.99802821109721	7.50517802963048	8.51120312785169	9.06398561731466	8.23300651388033	8.5590281305984	7.24871209364357	6.83280100150485	7.02328160963086	11.4851049450458	8.31142979381059	7.42583124883151	10.4362589137263	11.3598921121499	5.59109692129937
A0A0D9QZT6:S504		S504	10.390191713923	8.65130790925747	8.93922230748731	5.65704534083212	7.49803152798329	6.89515494504063	9.55235607149308	9.30390486964333	8.89210160395269	8.52432814407156	8.72504033255163	9.14362293714109	9.86640623735262	9.4930498364241	9.47830064665004	9.86026210411545	8.06148906175629	8.05759913177613	8.1523511693197	8.25840003022251	9.99272925939402	9.27912279480396	8.31271851893061	6.54743133001537	9.67929153393139	8.86571254815074	7.99095486860534	9.27991840560727	7.30389983860947	8.6342248172019	9.80037938398406	8.26884245681606	8.70903225168995	3.97012637863137	6.69519820974045	8.55738954715499	8.42469167966473	9.21521034429263	6.99429212148328	9.37678735369255	7.94356637976499	9.12632314799903	7.71809832846829	9.38835473880473	5.80288060394798	9.72159816209562	8.74701666847416
A0A0D9QZT6:S597		S597	14.2600068754643	13.1213867537286	13.4872955244015	13.1085963632172	11.9748623817062	12.0794070759785	14.1553736158072	13.0309752510269	13.5132076547353	13.7588048089378	12.6649478348125	12.9482056352459	13.700281204101	12.140403826448	8.64712154604162	13.1223881250436	12.702654278967	12.8819021645328	14.147547076097	13.6749360804716	14.0272208768057	14.1310713094981	13.5799196639617	13.7137852271297	13.2587616358747	12.5924995331255	12.8100710662321	12.7442502190378	12.335302430785	12.3640642528634	14.996708012948	12.9634828015268	13.3597398459825	14.1657963807649	12.8691235028731	13.2019694428193	13.7029243392904	12.5061363010226	12.6535872702599	13.3632109249016	12.1505750028079	12.5881980626132	14.3972001699609	13.1931796528581	13.7342176812541	14.0008519437468	13.6243558437693
A0A0D9QZU6:S27	SHCBP1	S27	5.04153633540982	8.42434986418569	8.74538626768014	9.30891617049647	9.28921630002611	9.18261608786153	9.14276628810547	9.25609433050647	9.09043364832841	6.08835931454191	8.78489386537847	6.90512229165601	8.26810076271778	10.3292153503284	9.45627413118736	6.98967411273708	9.05895020038209	7.68287172950698	7.00939657001227	8.36992965452183	7.98723109768018	8.85134110058999	8.98048469701803	7.98014127592676	8.94198863034836	9.68837453993915	7.52495158738267	9.15294978341643	9.2589637922449	9.061074608917	9.25054710090632	8.74379654671573	7.29740922245953	6.34962463471361	7.96334903620054	8.00288789750517	8.14620672909624	8.65488858896468	9.40219611558468	8.8471980311584	7.5184320332235	7.82494385469639	9.83905757745924	6.83329509185044	9.0376979861269	8.08513121286951	7.75938941222476
A0A0D9QZU6:S29	SHCBP1	S29	8.41619400397248	8.42434986418569	5.21841010174997	8.32044050056967	5.10884594962552	8.61007275426969	9.14276628810547	9.25609433050647	10.3216997826642	5.53931200987209	7.79479638230559	8.15562220793057	8.26810076271778	10.3872744829997	9.45627413118736	7.31341899338112	8.33414688062769	7.68287172950698	9.4391049118716	8.36992965452183	8.07798169841922	8.85134110058999	9.13098518955945	8.84363448568543	8.94198863034836	8.94998735685814	7.52495158738267	9.15294978341643	9.03139143799864	9.26276531131625	9.25054710090632	8.74379654671573	4.71013843434011	7.85904939738465	7.32739386408026	8.00288789750517	9.47921596394163	8.36374640146022	9.40219611558468	9.86499553432835	8.82227396504722	7.82494385469639	8.51774697409082	8.19660227302888	9.0376979861269	8.14451841103096	8.84781301753424
A0A0D9QZW0:S100	TRIM25	S100	8.45967581189567	10.1250156177216	7.38101443593463	10.0725957396034	10.2764927326428	10.6752555552179	8.52106427023723	9.43846179817167	10.3442425756855	9.0081557491925	9.35607210782908	10.2660159290695	9.8003341455736	9.39136648963968	8.9193146231011	10.5937560767643	10.3228104686969	9.6817571049272	11.1763885717327	10.1624456657594	9.94432282117154	10.3288930351004	10.9896469876233	10.1647065509748	11.3286372312041	10.3138352040286	11.1271265466009	10.945729951073	10.2283486805081	10.6633071311594	9.70628308459611	9.31996656278817	9.28330520073463	7.36678601306471	10.4124969669034	10.7435006161788	10.7377905242394	10.3879126277449	11.3330793214577	10.3556082712741	5.92010727862012	9.35314341394338	10.5388242063959	10.5596017294454	9.6155183608327	10.65203694585	10.6732855041312
A0A0D9QZX2:T122	COIL	T122	12.3056783646485	12.3144965008102	12.3054533067133	11.5488990377406	13.2336679751289	13.115266530975	11.4197793341524	12.3887283128571	11.88601758981	13.0155097376538	13.319440248237	13.4883850630121	13.2392911687199	12.6723657674737	12.7696485239243	12.7386332842545	13.5050145925343	13.3371503278142	11.7252267924504	12.4211925000335	12.06790785279	12.7602903677667	13.6587389913031	13.1486330588929	12.1437549405455	13.1827648293231	12.9735125061073	12.5654384137339	13.3196874776691	13.2960126819231	12.2794691810671	12.1601539330952	11.9313659092636	12.5467891090323	13.8249473034936	13.5932375356248	12.5131430526937	13.3280505006386	12.721711575727	12.7870482420256	12.7011400440293	12.803665063463	12.0647593466889	11.7900065430371	11.846462211469	13.0538535995535	13.7446343067565
A0A0D9QZZ4:S95	DDA1	S95	10.4249871683883	8.45960343909156	11.1556258400641	12.346275201933	11.1380725156395	11.4492297749673	12.2377841576828	10.5446277491569	11.2847224488551	10.3666041574171	10.5371631844458	10.0474360654154	12.3194433123147	11.9671880441047	11.7451810222104	11.7425234342532	11.0431058200084	11.5372358033642	11.4735829312347	11.0043076275206	11.9744026572417	10.965852716609	10.4791873318845	10.5760529761332	11.7742532320287	10.8679497065517	11.2683155153464	10.7401260851672	11.0818261371334	10.3463357164932	11.044529686518	9.65280785061958	9.91958055243419	10.6045580026324	9.9384055703852	10.3097116148103	11.7739723611766	11.0881396510034	11.54829314054	11.6180278199823	11.2299650057761	11.6452624805794	11.0083982686945	10.198301731409	11.3067155809863	11.1627613755473	10.7843705557188
A0A0D9QZZ8:S333	KRT77	S333	7.73447282155302	5.07790266588918	10.4861613046349	2.12845751894326	8.03634160542138	11.5968775340418	6.75237748767008	8.80740286019065	8.18016121014446	13.2775254444894	12.7113161117067	8.27176078059799	10.7317798586253	11.2988186359121	7.98782924882504	10.8739616052251	9.40062895834914	7.7550451580191	10.8612617085582	7.23052542665708	8.6681364770645	8.55303333951994	8.44182284710941	5.59475376901827	9.31560897469769	11.15172642359	8.11296836832816	6.86503684735623	12.269628613154	11.8851068609392	8.2894630709288	7.74654511054589	11.6626790320506	6.69735835551704	12.3090046367774	8.67305039512595	8.55695942960852	11.1836819527031	10.9630723103294	7.29970797179018	11.4216269180172	11.009967244005	8.04814467647208	10.8148341171306	11.6364458245282	7.84972159760641	12.3297775300543
A0A0D9R000:S104	AKAP1	S104	8.19188663969907	8.66606881752163	8.95597539447204	8.54564570318168	8.89029573266325	6.60416553518859	9.43599512382877	8.26333054146062	8.94494200758062	5.81868008215021	11.8257696113467	5.92868266633296	2.93600472796646	6.53809464490911	8.32679833898315	7.73815118465521	8.37454427840816	6.51235111507266	9.38117951939927	8.10202880041604	9.07915533018502	11.6755136621891	9.06507120847039	6.06381514908728	11.7732881902161	8.81361823540222	9.38829059950319	5.90108547384595	8.0229559048847	7.27778183399825	6.78701120178077	7.1764008854028	5.04904182287475	6.04017779202423	4.95126897464015	4.93824475503993	11.5404684133906	11.7163661007538	11.5115402444751	9.22384003981557	8.21177961509288	5.48109880619641	6.93593537624776	8.58251924254222	8.61458331978525	9.20414192438022	9.29648200931161
A0A0D9R036:S1268	MYO9B	S1268	12.9746345290747	12.6193811122415	12.26216342557	11.9134707403161	10.0838465645476	13.7451388071323	14.148491677948	10.9499821629082	11.4350757255019	11.9856726436446	11.5207023582177	11.4596412626879	8.03507348651797	11.1799065368418	10.3373474841783	12.0272625176911	11.5751901181544	11.8451582408719	11.4697898554389	11.914717160147	11.5051760051076	12.9524851807717	11.3783674550006	11.7676380326652	7.73897895869562	10.5946784800364	10.8883990146534	11.1992704807965	11.3924650194903	11.0364498074405	12.7222582299605	10.9705211884713	11.6982199579835	11.0697749867605	11.3199919466998	11.5403143621258	7.54972341396812	11.3631825078817	11.7247385455816	11.6845566831723	12.1116549247169	11.7275109193803	11.9918787838027	11.8091638025528	9.38300972989414	11.3594213974771	11.9233550096518
A0A0D9R036:S1406	MYO9B	S1406	8.1592243296295	9.20702847249861	13.5945466886072	8.32139372352787	11.7629504677078	8.24773445492218	7.72963390407752	12.6961181285374	7.8890227231024	8.73175271281072	7.38304842573513	13.6831510694778	8.76873186537513	12.1820652131295	12.199586587808	8.85657938118595	7.49015791832908	7.05133874247948	13.7223726700713	8.65220554189359	7.86050231357076	14.0075739925984	13.6634349780471	5.43137071176039	12.4001057055385	7.77245015892368	6.83726761776112	8.35562183470491	7.86316513811231	8.82758968530264	7.54027078180265	12.8636220320493	12.9730866824473	13.6833710479212	13.5769271724633	13.5387211865065	4.788604795012	12.6243793897145	6.12766096686337	5.05449741772418	9.26459183303745	12.2877955408753	14.260840371012	13.3497327273557	8.60019133942217	7.29271708633932	13.783420966384
A0A0D9R036:T1269	MYO9B	T1269	12.9746345290747	12.6193811122415	12.26216342557	14.1490084321515	10.0838465645476	11.6369503666631	14.994029122955	13.4364510456383	11.4350757255019	14.1110039435528	13.6398923248957	11.4596412626879	7.09934371839271	11.1799065368418	10.3373474841783	12.0272625176911	11.5751901181544	11.8451582408719	14.0678702509906	11.914717160147	11.5051760051076	12.9524851807717	11.3783674550006	11.7676380326652	9.42112735751522	10.5946784800364	10.8883990146534	11.1992704807965	13.2737286352306	11.0364498074405	14.3572415135806	10.9705211884713	13.8191240738939	13.4316617189418	11.3199919466998	13.9025548568942	9.38982124830131	11.3631825078817	11.7247385455816	11.6845566831723	12.1116549247169	11.7275109193803	13.7830496117378	13.8009217081574	8.74743016498013	11.3594213974771	11.9233550096518
A0A0D9R036:T1272	MYO9B	T1272	12.9746345290747	12.6193811122415	12.26216342557	14.1490084321515	10.0838465645476	13.7451388071323	14.2737855206301	13.4364510456383	11.4350757255019	14.1110039435528	13.6398923248957	11.4596412626879	8.21712569729289	11.1799065368418	10.3373474841783	12.0272625176911	11.5751901181544	11.8451582408719	14.0678702509906	11.914717160147	11.5051760051076	12.9524851807717	11.3783674550006	11.7676380326652	9.2585961156963	10.5946784800364	10.8883990146534	11.1992704807965	13.2737286352306	11.0364498074405	14.3572415135806	10.9705211884713	13.8191240738939	13.4316617189418	11.3199919466998	13.9025548568942	9.22283475798583	11.3631825078817	11.7247385455816	11.6845566831723	12.1116549247169	11.7275109193803	13.7830496117378	13.8009217081574	7.57591558876762	11.3594213974771	11.9233550096518
A0A0D9R040:S1522	TCF20	S1522	11.4460172237037	11.974034600707	11.9526483870698	5.68103430706404	8.26974672267744	8.60645152282943	6.77834922591281	7.02985515050978	8.33157779942605	8.14679503228676	11.7399572529186	12.1327374136865	7.91778905324222	8.90077525637256	6.25529853690435	6.84422036631177	11.8299357190902	8.1983208061285	8.3800118945465	9.13192716502809	7.84673553555221	11.3385962473013	12.0235809850755	11.8354364785765	11.5518727992426	9.14251846820962	11.6553877210825	8.3248461815567	11.6985612784407	12.0709877829141	8.95133914117203	9.01705473268314	8.16393911986386	7.36083960872777	7.93889517347178	5.34871716503446	9.33778155048933	7.93645581065629	8.19520200855671	9.43933053697707	12.131054146458	8.66103537728807	8.76919658852779	9.39257958179267	4.82336306927143	6.12289733644047	11.8958874361654
A0A0D9R040:T1671	TCF20	T1671	7.58752412031815	9.3677149385339	6.07601881774711	8.34257449452876	12.8296175630895	12.1558910099477	7.89924843031118	11.9563570988017	12.4305987439554	12.7903893802318	7.87503618981506	8.6228805169782	5.73647497340693	5.24598924737426	12.5377688386135	7.52611034051323	12.6349455604708	6.57890275384043	12.4614857501745	7.49864577605542	7.27447603986606	6.59220879793799	12.5493641239372	9.00729932940063	9.26589148329766	7.22690085021537	11.9962298970349	8.22091172177128	12.6513947064033	7.50490175480521	6.53413372958308	6.65083019966539	8.85676134262684	12.6646624526218	13.009493532315	8.02708989880146	7.69683880237383	9.29843915197211	8.68160864950776	9.14722108049082	9.19221602805673	12.0731394538348	6.43188079090085	7.86010477985961	12.1805849184745	11.6213254283188	12.5794982005895
A0A0D9R044:S549	AMBRA1	S549	12.0878681569714	12.2590910696649	11.593757940495	11.1941285743373	10.2806329589719	11.0033075854606	11.7918122813822	11.8280020561023	8.72339037854498	7.09006969926239	6.93997473339494	9.16358628645242	11.9257723632365	11.9651729566744	12.1155091799542	6.95086938999537	11.0437641413809	11.7658432683678	12.9967809319464	12.2563837546294	12.5254734728662	8.91873742608539	10.4119829152139	6.43606201845513	12.4015638753265	12.0807361349259	12.3070368835574	11.5687370629539	10.8340834225872	11.3177824026115	12.8011273303099	11.7834492483325	11.7803187849044	10.1043366602841	8.16352205543514	10.6854623533838	12.2037209138714	12.1055228294405	12.3862452266228	11.9502606878864	11.1804918800367	11.7483581204175	12.6492552307407	11.9984332288988	4.71302633725767	10.7245708535688	10.8722991057087
A0A0D9R051:S51	ARHGAP1	S51	16.03438349408	16.9588857205595	16.5717710365911	15.7552794712597	15.9790015316125	15.8956262874588	16.8019958504807	7.02631225308113	17.206307302446	17.1464771269262	8.74773171547875	7.79797200752762	16.7387013146099	16.3650860351441	16.6245516087047	15.9366485828204	8.79356673905113	16.4061984143166	16.4326033685753	16.4182207734298	16.5231450628635	16.9493033093727	7.02974972398029	17.0049612651472	16.0856200978571	15.6340036757175	8.30395595300264	15.7933211258787	15.9890999833077	8.39079767914465	16.4541245408805	15.9851463562409	16.2730404439135	15.6516278307528	9.08080454503503	16.9420188459475	15.873464733832	16.0116349311228	16.4982700851013	15.1927620484567	15.3994070007874	15.4786061832152	9.21943596516118	16.3648301084388	17.37551408755	9.32955388553927	16.3799372055122
A0A0D9R062:S283	ABCC2	S283	11.6685731314348	12.4843996750571	12.8187664992072	12.274054944431	12.939870619347	12.557103026023	2.57265433153263	10.8863983477962	11.6298056407226	13.5455287322263	13.9712645444461	13.1950157531991	11.9070753360718	11.6667210917551	11.9128608172897	12.3291588273866	12.5180634508005	11.9141329842075	12.9327679663067	9.28158968866755	12.1807783360236	12.7834668316973	13.1496652749837	12.6907979127345	8.70485651211122	11.6833082784734	11.4757522473666	11.8780162091675	13.409099934677	12.8584386062178	12.2985932440197	11.4979389130445	11.7998398370504	12.0729831393464	13.2223813514033	13.1008400653651	11.7564174140702	4.05913676840952	11.7802813154848	12.6073049435361	12.777702822363	13.2523642923628	13.0237264684426	11.7723437071137	11.1502033146614	12.6407968440396	13.5346459056026
A0A0D9R064:S254	ARFGAP2	S254	5.06535627191077	11.6117739861191	6.43807936015604	8.27151816532767	10.9715287071429	5.02102326440003	11.1619617589415	7.40231801531858	7.94780295031022	11.2249828234978	6.87633966407699	10.4829342508529	11.7093250636531	7.21453764054497	5.78908925119283	8.28817572902106	11.5800717372042	11.269952910512	11.9032978461549	8.88869666291946	11.2691193678723	11.0747483681564	7.28618099741094	7.65931613445135	6.92974787462521	7.24750359959533	11.6774756134657	5.93686719841063	9.22309607189646	7.73412228165233	11.5839721380846	8.54892261694587	6.89861654400965	8.00512376260251	8.38994061727261	8.37651703582905	12.0336276871678	7.83518348146497	11.8592109284517	10.6804903871188	5.33860658349045	8.8889142270343	11.8533985502267	11.4056734703501	11.5383114620937	11.4111799006006	7.36866794365721
A0A0D9R066:S354	PACSIN3	S354	12.6836547927157	12.6436054992989	12.1811115967344	13.1745315747658	11.8388519167883	12.1727537908866	12.687770436245	12.2340127928414	12.6592366859023	12.8236035042332	12.0260046554228	12.377898290229	13.0093338217244	12.3599147753489	12.5375409895853	13.4366396777291	12.6219328537975	13.0096321940918	12.463404219724	12.8312044539049	13.0726642477151	13.0601221140257	12.1183361625884	12.6038556083667	12.2731710903204	12.0848256092946	11.974097271163	13.2525603965982	10.2120251289973	12.0472407836264	12.9225622996824	11.4325712843085	12.1925973824925	12.8555329674545	11.9289898217513	12.7128238374196	12.9805573702038	12.1901365213255	12.6909634964129	13.3961371822566	13.0884520241754	7.66381636750816	12.4397364782572	12.3492550465054	12.0662692758812	13.0591031823329	12.7275274531496
A0A0D9R066:S383	PACSIN3	S383	8.53072690394797	5.78599209910146	6.93155041813466	8.53387194977598	9.95245645053808	8.52661681480845	8.68740681060065	9.36905860920254	7.50077140388446	8.42969858538746	8.64734806944032	6.68756221292149	9.06650511529351	7.10279797546535	9.09009506739566	7.54777863583242	8.42876804270362	6.4621079474347	8.54739655139291	9.19565015148759	7.85500383074389	8.51996078302333	9.21471484409368	7.23185548124163	7.8347876259286	9.54006621566509	8.63980997498643	8.11855439045365	10.4881705979946	10.228612706537	9.22059734735522	8.41369689260571	8.67996562328954	6.38058966165443	8.23133799856507	4.22583059783801	8.79291122310869	9.13423414362154	8.88281208169456	8.44847835269223	8.40085214337969	7.98813010401092	8.04462507056647	8.71754041925148	5.41756732085699	8.98295236790508	8.23138627477466
A0A0D9R072:S1198	MADD	S1198	9.29220693855876	7.45345798641552	9.2183953119666	4.16609523298021	8.64787063230428	8.04514779553806	8.63155919990977	8.81524414067619	9.19660630701533	8.36362950845963	9.39515735489239	8.62657911547477	7.90470072849217	9.38818973681533	4.92250154990719	9.10636926204018	9.62793359498734	8.28485110982197	8.55393377574481	8.60357245847292	6.77214563472052	8.65620232951246	9.88911382350194	7.18028070516823	6.61834165258946	8.2972413553563	8.29797014119711	8.28128345611272	7.48905283610913	8.85645576607449	9.10476675354417	8.87890185160669	9.26001113739106	8.85063559353242	9.40533172062201	9.72887916384068	6.72940695374397	8.05946122497325	8.49725374615552	7.20859140828754	8.90589632483713	8.52843696730717	8.34717071107764	9.22451418051447	9.96023212571316	9.05849781318365	8.89257224642651
A0A0D9R0C4:S383	ATG4B	S383	8.60160516728507	9.47767194556937	9.01555296704454	7.8703960745903	7.38869252713646	9.37179263176731	7.67508645176899	8.23580179474744	7.40643830229819	9.91309681725971	9.30657053103901	5.15888110328559	9.26549633812103	7.51018003694295	6.5304636112779	9.17720306799142	9.4412414526062	8.63843826078625	9.99604511179074	8.26005267038791	8.87928998061816	6.53407143120112	10.3867142220874	7.7832467864529	8.67312906512611	9.72996387558662	6.177217331475	8.97307962259188	10.402838843064	10.6614628379924	8.09086329710681	9.47575216863392	9.73926511538335	7.81131564554259	9.25599004959902	8.05727696658127	7.15611854515895	8.10450179594352	8.06347308334889	8.86137957406975	6.35667366325872	10.2395015610871	9.2110154460752	7.96122082899932	8.20250390896903	8.40871741312461	7.00982067209338
A0A0D9R0C5:S348	CALR3	S348	13.1305501612859	12.7677484403719	12.214422235862	13.9658179195175	12.1711712158484	12.6414186374198	13.8520242852385	12.2526131532208	13.0272275910001	12.403013909975	12.4222878450842	12.2288602264263	13.5758607146696	12.832280506808	13.0748558097652	13.8016199846797	12.6408903085697	13.3897995981302	13.2484142829797	12.7264672670739	13.1636675365954	13.3787972399055	12.9045779634967	12.4879543142252	13.3736146326203	12.5488268462239	12.9488423278566	13.7729118068112	12.8519789356365	13.2930818739281	13.6456705307785	11.7261145416819	12.2317298858465	12.9462331348003	12.9276479988519	13.20047807622	13.7066309944918	12.7633608796047	13.4201879772515	13.5204854902489	11.92177227849	12.6641903131159	13.5226634835959	12.4940611619948	13.7663206079483	13.4462746794828	13.019507322541
A0A0D9R0C7:S253	EPS15L1	S253	3.92101817104355	9.39906020390488	8.68927249107026	11.1612764051821	9.20880649214733	10.1013566028811	10.8963238580991	10.2440086037225	6.97227781767633	9.73408616150286	7.39290679990849	6.6272195050001	10.7300382109935	10.1369860825917	10.0894889145046	10.7027367816194	8.57654598554815	10.6365145760123	11.0950413025069	5.93342910739654	11.1682461579782	6.63770665894861	6.65886138424942	6.34645629693119	11.1220491373753	10.3147180484666	10.457557250464	11.2575475278922	9.90290432035907	10.2713972424855	11.3466823998214	10.3454398537203	10.5483420562865	8.08196161753483	8.94487900721112	6.26937845555064	11.6732740034932	10.5071629771874	11.4031713077904	4.51317927333649	10.2742275299583	10.6729609876672	9.85502355667063	6.84886801060535	8.45940073655016	8.10820922468041	8.26740750371892
A0A0D9R0C7:S255	EPS15L1	S255	15.6480258978411	15.6747053622405	15.564547085928	15.5688582129645	15.0637261088413	15.2190490773637	15.2495721993529	15.3217824017892	15.3374743675228	14.8169775216133	14.218642620573	14.4278218081158	16.0196560645046	15.3528376987573	15.8076969015092	16.1559588080165	15.7428077624953	15.9600873156877	15.7803899819637	15.6106707988449	15.9293783310482	15.26553575149	14.724546124158	14.8878527957816	15.8388430391508	15.5537313425537	15.6286043265491	15.8098364246956	15.2179965163171	15.4912465285075	15.7701150760102	14.760969005818	15.1742217726094	15.5250449083996	15.2389964498741	15.3107801058478	16.1114862605983	15.5539809651096	16.0617877620131	15.7634177491684	15.3799516578022	15.572978021349	15.8509405571802	15.2939895718002	11.3835161493236	15.7558178315351	15.4388585609518
A0A0D9R0E2:S218	SEPTIN2	S218	10.5766421072009	11.8931710921079	10.867859827352	10.6563816523968	11.7038692516914	11.810927768215	10.9041222410541	11.0877961221784	10.7759047234551	11.7778821819577	11.1750657802242	11.8623904960509	11.4956034324607	11.4961397081658	11.2247574644687	11.0829607220549	11.8997845333638	11.198941875594	11.0592681805451	10.6415282536396	10.9206221759209	11.0800157876714	11.652002319563	11.2993581968902	10.2279489456526	11.3614054619274	11.1539091460081	11.0625947719607	11.5188546923488	11.8762556026394	11.0743785572092	11.3779135511074	11.2857099634914	11.5970002630048	11.0813103826585	11.2599288110432	11.1396447601445	10.6890785876007	10.4902504084551	10.5063359900998	11.1989005473433	10.986408853677	10.8058065650644	11.3750731908438	10.9907716280393	11.0740465871237	11.8362379412808
A0A0D9R0I6:S431	FNBP4	S431	11.6862818100892	8.91214885296626	8.26144377710876	11.934974969332	11.6916486205385	11.9096268328491	12.1227257589504	11.3820146960457	9.11945404956966	11.1366578522093	10.236814533169	10.7770471366898	12.28909418907	11.9299209475605	5.54496956025326	12.3685207520505	11.9562053816401	12.4069907436744	9.43393438273504	11.1378413675715	11.7102144324769	11.3335510407095	9.3122979425728	7.82296557840523	9.10223688557003	9.13464621211948	11.6743095937752	12.1674112330439	11.6769763339886	11.8405762962822	11.4754940381287	7.73989716053268	8.23480259419717	6.1144012248949	11.3350744466398	11.6896134220569	12.0246648684449	11.8944228989584	12.2701304870458	12.0618589164909	11.2235619755657	11.6118276699776	12.1089037451539	10.976195088796	5.85428590203752	12.4159758913156	11.8596945026913
A0A0D9R0P6:S167	ZNF768	S167	10.6519401851682	7.20078970759086	9.61591219243959	11.1494364975181	10.2221363412533	10.4296928143789	10.2531141758444	9.55066980766633	9.96347719718722	9.40022812478129	10.6513035354387	10.4181371737632	10.9138133786819	10.6492840345115	10.6437901630796	11.0581611037923	8.30005590375261	10.8744479026229	10.3953954487841	10.0216904656493	11.1743893200434	11.1208205292179	10.579850895766	10.4186625956935	10.7003166288817	10.5374408161278	10.5494360771444	11.3441082973951	10.5169494774398	10.5070780008217	10.4220218878953	9.25126328056312	9.13998381516329	10.291669419643	10.8172436086311	10.454264620556	11.3743073643411	10.1626801682864	10.9447459242114	4.62634550815976	10.7397261467895	10.1283855595517	11.0878111678385	9.97651965436245	11.1404626569324	11.134912982773	11.206722841652
A0A0D9R0P6:S83	ZNF768	S83	14.0588419921343	15.2335330310209	15.0410458603693	14.2830275627909	15.5686042832817	15.423793135257	13.0294239877853	15.3205853673291	14.8659788144517	14.7416477412311	15.4040598487792	15.3722538698237	14.8515034988738	15.1024317176503	15.1564161453234	14.7257673725823	15.2481805799109	15.3108697273218	15.2844621271051	15.259368783599	15.3315780351449	14.3400182702322	15.338817191944	15.2387555444369	14.9516804433331	15.5166974086795	15.4004887544955	14.7047208236856	15.0747039221954	15.4546218494882	14.6691538864335	15.6073164534842	15.5251786468969	15.5740470012134	15.5475201495334	15.7396134813259	14.3826628657133	15.5371638347585	15.485182511229	14.6287247192074	15.3282694241298	15.0280229330283	15.1213309803041	15.480019216407	15.4081466390532	14.6423570188323	15.0797369875736
A0A0D9R0P6:S90	ZNF768	S90	13.092708545258	14.135881951315	14.2612989726914	13.7274706982395	13.5862930731453	13.1563000044766	13.0902753145294	13.1545430306745	13.3664247296001	13.7829496908179	13.4872585543107	13.3937632886175	13.8517261951757	13.4892757565306	13.7497735964294	13.5542703538508	13.4061979304984	13.1872930900743	12.8903848899455	13.4586310417957	13.2827723137248	13.0886138490883	13.1891253153236	13.1067883073205	13.7427796882914	13.3804218311801	13.5142459884428	13.0621065444569	13.4394818297383	13.556278148767	13.2634573291427	12.9971192032838	13.1532546223613	13.6616389707352	13.0761243206631	13.7241457419435	13.0338857683515	13.4877984481142	13.3780186346326	12.8064420522252	14.0015227445667	14.0908641745878	13.4011353538864	13.824378377067	13.4505878261043	13.358792715951	13.8206072930087
A0A0D9R0P6:S97	ZNF768	S97	13.092708545258	14.135881951315	14.2612989726914	13.7274706982395	13.5862930731453	13.1563000044766	13.0902753145294	13.1545430306745	13.3664247296001	13.7829496908179	13.4872585543107	13.3937632886175	13.8517261951757	13.4892757565306	13.7497735964294	13.5542703538508	13.4061979304984	13.1872930900743	12.8903848899455	13.4586310417957	13.2827723137248	13.0886138490883	13.1891253153236	13.1067883073205	13.7427796882914	13.3804218311801	13.5142459884428	13.0621065444569	13.4394818297383	13.556278148767	13.2634573291427	12.9971192032838	13.1532546223613	13.6616389707352	13.0761243206631	13.7241457419435	13.0338857683515	13.4877984481142	13.3780186346326	12.8064420522252	14.0015227445667	14.0908641745878	13.4011353538864	13.824378377067	13.4505878261043	13.358792715951	13.8206072930087
A0A0D9R0U2:S199	CHMP2B	S199	14.232062794775	15.0315196671039	14.6525999807538	13.7238504275447	14.9121532916489	14.7729938260022	14.014825359668	14.9737186889745	14.7128087017582	9.33077867254108	14.2176243204686	14.3455280821391	14.0056562024725	14.1586042422078	14.4553230911523	14.166299301293	14.8992364649655	14.9661360039912	14.9738433202678	14.5483756844279	14.8652854852317	13.6238944576611	14.7105803067898	14.436048225345	14.1431754098814	14.574413536771	14.6034132822055	13.9139751014217	14.5713349703909	14.7411873497811	14.3436177970795	14.9708531503365	15.0818132298185	14.627016698106	14.6924012169121	14.8619351915395	13.649775493602	14.853086709143	14.7181494767719	13.8727557915788	14.1974219572042	14.2333020532196	14.7329798013552	15.0842422291436	8.86744383694496	14.1899703946276	14.50158246021
A0A0D9R0V0:S1385	TNKS1BP1	S1385	8.64062654963335	14.006316843225	6.65584594579689	6.83047107585698	13.5932947647335	6.71058190797559	6.4156508264976	8.37684139091229	14.5318633134104	9.24804492030747	13.7756901787965	13.8825113135167	13.2332883215287	13.4033450897859	13.4808255423944	7.64982711947713	9.14169420739717	8.40004787390649	9.39477670855391	7.64275323838159	13.8708998939691	13.4117207689127	14.2090915042624	14.058665905303	12.6359612620462	13.2114865629634	9.27678513184405	12.5658437098557	13.2777886374048	8.0797769075597	13.2116226660075	6.00726797559555	6.89722965500037	9.07858493969859	13.8529038031412	14.150720943969	9.01998700825769	9.18506985065972	9.11115969204663	9.42968594708068	7.70365364652406	12.7825102375955	13.1650024016306	3.63717455183848	13.9619675035082	12.6709720156943	8.84260866635595
A0A0D9R0V0:S1620	TNKS1BP1	S1620	15.6059638532905	14.9463799262402	15.009976451548	15.8142114563184	14.5659327308846	14.6772973055094	15.6032702541974	14.4882038481288	14.9471427948893	15.0689640146717	14.5457242747942	14.7157785705427	15.1826359768494	14.8296014991924	15.0962602260878	15.5533328796625	14.910634637568	15.1893875340253	14.8022741687259	14.9862900626142	15.0434504403065	16.0888352159501	14.7733837581675	15.2275976081569	14.8460142167343	14.4199652985103	14.3881605095737	15.5937246616637	14.3431710738041	14.5297599249694	15.7188791518764	13.2652199264431	14.4327712895082	14.304730462048	14.730794737104	14.6180501425197	15.5411040358897	14.5182232370416	15.2312685054027	15.7708273696905	15.1283718162614	15.3467103514144	15.0186860424705	14.5866091176714	14.8146358762178	15.2555192782263	14.6952900493504
A0A0D9R0V0:S1621	TNKS1BP1	S1621	15.6059638532905	14.9463799262402	15.009976451548	15.8142114563184	14.5659327308846	14.6772973055094	15.6032702541974	14.4882038481288	14.9471427948893	15.0689640146717	14.5457242747942	14.7157785705427	15.1826359768494	14.8296014991924	15.0962602260878	15.5533328796625	14.910634637568	15.1893875340253	14.8022741687259	14.9862900626142	15.0434504403065	16.0888352159501	14.7733837581675	15.2275976081569	14.8460142167343	14.4199652985103	14.3881605095737	15.5937246616637	14.3431710738041	14.5297599249694	15.7188791518764	13.2652199264431	14.4327712895082	14.304730462048	14.730794737104	14.6180501425197	15.5411040358897	14.5182232370416	15.2312685054027	15.7708273696905	15.1283718162614	15.3467103514144	15.0186860424705	14.5866091176714	14.8146358762178	15.2555192782263	14.6952900493504
A0A0D9R0V0:S1715	TNKS1BP1	S1715	4.34012474226283	8.84321994977165	5.7485567948332	8.40025503525556	7.09758840409353	8.1742192005773	4.10779546348669	5.75881962853145	5.22213005799041	4.81196119879324	8.64271448416297	8.28624407118032	6.51804176977412	9.17115339715958	6.03596144305495	7.95667960388493	7.49294434099314	9.20452899097636	9.28682124089779	7.36382186065497	8.63707147947127	5.24874586524178	8.58642769906801	9.0926388759723	8.62985918982586	9.34874288208542	9.43885687521371	6.99191661809129	7.84898737441915	6.43082798402092	8.52980517262384	8.73847236126912	8.09617937084398	9.14131764488478	6.50209969368361	6.14956446016795	11.0733587290538	11.1730138159798	9.83977120394144	7.61803336563164	7.14018706436012	5.84914065390827	9.11489668651333	8.3070791414591	8.45147192415792	6.42928290564866	9.09667368629719
A0A0D9R0V0:S429	TNKS1BP1	S429	12.0995430814033	8.12628001675778	3.24721126747176	8.12612548914774	6.88550272308667	9.38820490577613	10.8963350274193	6.1901799396508	9.12423121321763	11.9594723460351	12.1518981032917	12.0467399402984	11.1686994710454	7.20736874248487	11.0609926126851	11.6916897044086	11.3763000137174	11.901636141867	11.0048858164482	12.0534192195126	5.45815751088038	12.076395829748	12.3302300814894	12.4596245026422	9.20537982590039	5.12306121127846	11.8353093912784	6.69813653580991	11.4505828006051	11.5536314193276	5.31533919901632	8.25195200906913	7.42363107964492	12.2532324985738	12.399432365113	12.0824670574079	8.8364631393813	9.09982021450313	8.55278262411104	11.9154355318344	7.87983664655814	8.07845396244521	11.6209013248731	8.161783089178	6.05168494012264	11.7659622016681	12.2157690883783
A0A0D9R0V0:S435	TNKS1BP1	S435	6.95829356900817	5.58130661478794	8.39389665925123	5.54910083811103	9.24554136738119	5.96089490288664	12.0232808705757	8.00733078071994	8.08328883220398	7.89839959514785	6.11525502605958	8.91249163234216	8.38170059028113	9.38230910555811	7.34806832908539	7.75343310232222	5.06341341041756	8.27299257506518	4.99907531738701	8.08687826212356	8.03477701565428	12.5123488658891	5.49146636217448	12.6809523032876	9.44038443224822	13.2573609976164	13.2807177945653	8.98959816214017	5.96681195352763	9.1364930710965	7.22596906266932	11.547010212758	5.42928571732198	6.38917215680828	8.1833910976255	8.25815513114292	7.44321091337613	13.4625959466836	13.4663328282717	12.7963415085403	12.1950719814381	7.24680232950705	12.6524823634672	7.63909566311327	11.6719372113661	12.5982005873332	7.50401324020055
A0A0D9R0V0:S494	TNKS1BP1	S494	12.7922261145393	13.1806789575923	4.51191281421723	12.996584491797	14.6298395542375	13.7015748216517	7.2864114900123	14.3907632874081	13.4043450182345	13.9662298439809	14.0415815086614	13.4714119044284	12.8782535279011	13.537841528211	12.9692768801096	13.6036646866338	14.3567253781459	14.1102777182765	13.4608503376692	8.54319478519168	12.264225907486	9.28742204031596	14.1981369765978	9.02829655044946	14.6310669417516	14.480796573843	14.178461552834	13.7849519182467	14.745241458554	14.0573681426854	13.1715005442488	14.5256753494333	14.1570493651485	14.1347818575955	14.4789288501853	13.6395115759705	13.5755103621881	14.0009714352394	13.5439678759986	12.3537663630768	13.1082863878761	12.9870179625459	13.7890402457482	14.5267478267504	6.00966168188791	13.7080623316696	13.7885467590993
A0A0D9R0V0:S498	TNKS1BP1	S498	12.7922261145393	13.1806789575923	5.20029414669364	12.996584491797	14.6298395542375	13.7015748216517	7.27703772419889	14.3907632874081	13.4043450182345	13.9662298439809	14.0415815086614	13.4714119044284	12.8782535279011	13.537841528211	12.9692768801096	13.6036646866338	14.3567253781459	14.1102777182765	13.4608503376692	6.40735526053753	12.264225907486	9.12138136039888	14.1981369765978	7.49756995295361	14.6310669417516	14.480796573843	14.178461552834	13.7849519182467	14.745241458554	14.0573681426854	13.1715005442488	14.5256753494333	14.1570493651485	14.1347818575955	14.4789288501853	13.6395115759705	13.5755103621881	14.0009714352394	13.5439678759986	12.3537663630768	13.1082863878761	12.9870179625459	13.7890402457482	14.5267478267504	6.93121742169748	13.7080623316696	13.7885467590993
A0A0D9R0V0:S603	TNKS1BP1	S603	10.5766568808572	11.1697757737554	12.1544783164185	6.67310390002309	13.0790341431815	12.7314347807443	7.3969733472406	13.0528825624143	12.8899181961897	13.0465623254841	13.285558496425	13.6953797358263	9.40011902797936	12.501854419664	12.1278670360131	10.98260717083	12.7107329685803	12.4170870203573	12.3546947118634	12.1917131029925	12.283454477873	12.1106242951995	13.2365811144929	12.5813942283037	11.7960141128556	11.9620137924085	12.0178055562068	9.87756199259924	12.7658837245464	12.8786835121843	11.4541677027637	13.6026053630607	13.1209707378345	12.340310483053	13.2162712336823	13.1357109399695	8.2880134349221	12.4607480875097	11.8212143217849	9.7215669932495	10.9903928909877	11.1476897692581	11.6381402168118	12.9418326834458	12.2684520649017	11.5617860164391	11.966082691519
A0A0D9R0V0:S674	TNKS1BP1	S674	14.2938006147011	14.2401639296202	14.083513648499	14.428461135213	13.6281897592701	13.6938227459748	14.2732930233348	13.4500389379878	14.001272414055	13.8178955013912	13.7327100229379	13.7238839844055	14.5066886129315	14.1352748412058	14.2425513699516	14.4441204060132	14.0665790725217	14.3411585261845	13.8422528169275	13.7044476414432	13.8445631858438	14.2669135308496	13.5693291333881	13.5765429924311	13.9404652127162	13.5277149768574	13.5014805913925	13.6834248868542	13.8744722885146	13.8966427125482	14.2208127104892	12.8212848909561	13.2120617430926	13.5580108860752	13.5831847678653	13.5663969350594	13.8340000514345	13.8019476819547	14.0415235331107	14.1444016225305	14.1563892830755	14.156818614042	14.0231626338881	13.5702792881061	14.2463166174394	14.3808475849816	14.164490909436
A0A0D9R0V0:S693	TNKS1BP1	S693	10.5946266862612	10.2885677603256	10.8602266019174	7.69515260147794	11.7177936513256	11.1428250645455	9.69985689515769	11.3740148772171	10.0427105001853	8.30256143230293	7.7909935758331	9.98922861242414	9.07742906689672	10.7324119246683	9.51172272353523	10.5669336795409	11.1720614647764	10.268814603705	11.5870145589925	11.9508486345228	11.0772514146521	10.1739103208039	9.82972885132079	10.0064954194309	12.1245149888531	12.5670487976104	12.1733316081813	10.3774984315175	11.4639642325036	11.048497136129	11.7649890631905	13.7894936277061	13.1451776625417	7.47690124366182	11.1393902529565	9.85386031652469	9.93838141556502	11.3951487276498	10.8124522310047	8.05856671673849	9.06705123477023	6.96900731439674	12.3018878619917	11.6559365764324	11.0153756270385	8.3730681567683	9.82632626522318
A0A0D9R0V0:S714	TNKS1BP1	S714	12.2433206823456	12.7125101856519	14.1066825613577	11.0470230966839	11.0360742499567	11.8794081064588	12.7345098239315	12.3198321847685	12.5143749891827	13.320565593039	13.4006945411874	12.8607603776555	11.2807612260501	11.7941792750694	11.9270813309377	12.198656050752	11.8024804671159	11.8890335745408	11.4934554814432	13.2377325166256	12.4964158805392	13.0523392757469	12.3175664545981	13.3470657728262	7.10591277670409	11.5245605653011	12.4980299470917	11.6241190698537	11.8544417065328	11.6116488462127	12.3848137090403	11.6432934957617	11.9202581898266	11.7342613611944	12.5144143982779	12.6200047049336	11.8721753293826	11.0038840893105	10.9406344766706	12.4961805036088	11.4810099042052	11.4240432803815	12.3877244103157	12.8855483413894	12.1377223190604	13.1953506899282	13.0044826229579
A0A0D9R0V0:S838	TNKS1BP1	S838	16.794082295738	16.1109698788471	16.4412358941383	16.2398074046931	15.2930895315942	15.4817812481059	16.8650246153727	16.1213944920738	16.4994732378737	16.7363248420654	16.0008390039857	16.5497885583759	15.498718449577	15.183452871325	15.2108342112063	16.1445459847691	15.6635446976958	15.8837869214246	16.2359837737973	16.1809729208146	16.4448572713622	17.0147266749053	15.6760384013915	16.6716991156815	15.121436397139	14.5958480827295	15.1749611784838	15.9740399999831	15.1444952964952	15.6574411333389	16.2443213816523	15.2192532339235	15.7651815185813	16.9078492338354	16.1968284702648	16.4375699351604	15.5346224931966	15.5394452203298	15.3831488815141	15.3033201205555	15.7868157047659	15.754615084652	16.3290082290143	16.074361393576	16.6954131177195	16.7067168982043	16.4878824160043
A0A0D9R0V0:S874	TNKS1BP1	S874	11.2295486522301	5.88077588438452	10.4103633760364	12.6215514507903	11.4622620533251	11.9217177897027	9.06526190450865	11.6596427694539	11.9832942462218	8.76256839293647	6.05311650124917	5.86045857694359	12.7958223732863	12.3579179113085	12.8613728359093	12.2932382485152	11.8681871574792	13.0778977539394	9.40739922230353	8.2560529486095	7.00054154823705	11.7111122062839	12.1308909686565	11.2285634079944	6.93004215208958	11.0794648644426	8.87920225769841	13.2626059341497	11.852709774082	12.4942559716487	12.1568685224538	9.61446840263469	11.1131589380523	11.4671648161934	8.78861719968194	12.5400539728013	12.4763252864975	11.703057015788	12.6446256457339	11.8654583143724	9.17043284628526	11.998292160397	7.61817497588023	7.91891216469333	8.67464988285602	11.9549515678075	12.1081169451219
A0A0D9R0V1:S1488	KIF1A	S1488	11.1725862007687	8.39182186715992	11.6687494459601	11.043805180369	13.7205612952319	13.0387526154712	10.5073991952927	13.1490241369521	12.7654045083773	12.3418545817293	13.2862043811767	13.0747761465069	10.5174761698198	12.6491343631381	10.8723534468705	12.1064603493766	8.46036243961878	8.35986507951038	11.5305045494533	12.9836722012156	12.1892381476588	11.2340951059682	12.8603083549142	11.8760052863945	12.658814394408	13.0966318738206	12.9082378777778	8.87728724140061	13.6078879554189	9.12093134742637	10.843972802464	13.6465968270263	13.73304666379	11.2387258150647	13.6336525877378	12.2904831932723	11.8669539708255	12.4854237527041	7.37658513905149	11.4852746176362	10.963735663246	11.3457587116334	12.2992416253712	12.5042980927649	12.2360850314328	11.986467684141	12.5335938232207
A0A0D9R0W0:S444	SSRP1	S444	4.85649261271378	3.62344080586955	8.8160928409506	14.383303302874	8.72623593169843	3.92352928994064	9.16662286107579	7.47287527796134	6.93631594094125	13.4609642622896	7.77657789302319	8.47801805541678	8.89152044216194	7.97902742586968	12.908007895281	12.7874516132389	8.15752513934843	13.5482729345188	8.51326449095847	8.31660972517938	13.6635694050372	7.577338616259	13.2901046611856	6.66590835281846	6.91081993515665	9.14879898137884	9.111200411806	8.92867812083527	12.099225255762	6.89919644706508	13.2723368064889	12.1614081371477	11.3142831293925	13.9362453596084	9.24449135283609	8.72719737128739	14.0672556364831	7.53425442768582	6.88351568628135	8.29126142173573	7.24585530104989	8.89054318994543	8.44446852480687	7.8931928400864	4.73366371318406	8.51721655823648	14.4340955432623
A0A0D9R0Y0:S452	LARP4	S452	2.66864140224576	9.4298597610234	7.4886274140876	12.9415904109946	14.0947340202304	13.8549212308883	8.62378319762826	14.8896104873607	6.38655113203583	6.44556357479798	9.4348689973715	12.1196266898725	14.1902679289295	15.0288530519277	14.4288451823373	5.33044377559598	8.77385411221761	8.10240220712605	14.3046850160779	8.12186160718896	13.4451372166116	6.95189021561487	7.96543392149064	7.37201651921833	13.8083171665189	15.1401303769666	8.34217738593678	9.42479570712565	8.14792596060867	8.73695567629061	9.20377306512879	6.21616364482944	14.1275959193373	7.99606391957145	12.9296788931057	8.25025835645495	6.72117877629996	9.20896294536178	9.22337955404532	12.1961617425591	8.75100748520179	13.5363657167129	9.31416718693514	13.8682145864747	9.03401840348452	7.30533534887227	8.34831136961834
A0A0D9R0Y1:S511	MRTFA	S511	6.00796437722095	6.35430243837548	10.030734396262	9.70507854481171	9.72298992240884	9.5638909332647	9.9720782998614	5.36531973380294	9.82719340401904	5.54574710095053	9.0058440093428	9.08884004928627	7.25746268628288	10.8128426022698	10.3558251335099	10.7009093827909	10.1226919380492	10.5053622243899	7.56483992993106	8.49711077570772	8.49379775062233	7.68753711808895	9.68046882590735	7.61085050214505	9.01167246202678	10.699788736765	8.17377357796118	9.88752487462395	9.77402157290639	10.0185578035607	8.98754801765768	7.10367020306235	10.4101903987873	9.40144104365894	7.30595272972695	10.1182295160894	10.615110956193	10.146568784916	4.85403250444401	10.5301798326059	10.483345360069	9.6203524891696	10.1973513641222	9.651207353753	9.18644098320885	9.52473170788661	10.2154683376912
A0A0D9R0Y6:S457	CRYBG3	S457	10.3583992392952	7.79948155738786	8.23509917166931	10.5507303074456	10.5089733354718	11.2107966466981	9.44403157282709	8.66038441838398	10.9373856324401	9.85143884812997	8.65055725180922	10.7798318470078	10.1001137967683	11.3210150799127	10.2365009661529	11.3725536940049	10.711983756069	11.2169099267771	8.64330496028954	9.50558669600086	10.4845568403692	11.4808793989074	12.0070313072385	10.425242711452	10.9403097580422	9.27427364005077	11.6774871444449	7.95533071180127	12.3106919448971	8.25604039308537	10.7734616052815	8.88095785666789	9.73927859486124	11.6145907664739	11.4762171458922	12.6975404430514	11.1279011426515	10.9654481926119	6.32928699468833	10.6514715554797	10.0631624302127	10.389326884246	11.3983327466277	10.2983280493337	12.0216368337955	12.0471980559762	11.5969241836222
A0A0D9R0Y7:S490	LIMA1	S490	10.7894967381933	6.3569924777551	7.18528199964422	14.5907688180145	14.9618789138864	14.6887214757445	14.8426271307178	8.57543795610103	15.2114600073747	7.33920331517928	15.4458676151752	9.33203641496129	14.769879388636	14.7010246571553	7.31937881905313	14.9413813981007	9.01938221577024	9.32839103160424	15.0563153563392	14.8564393794407	8.33189132568697	15.3606489475669	15.5167220553246	15.4006869552895	14.5392103534413	9.1008490006973	14.3877058604662	14.7837029755985	14.2722569385812	11.3982107664543	14.7586125785206	10.6335042950083	14.7594202105887	15.1264804104235	7.90367221064495	15.5037388281403	14.5476170744554	14.6585914314102	7.44264265613678	14.5091016211799	14.3057640613629	6.54484353677052	14.663956158215	14.9730849810177	13.3580422298279	15.224753237374	15.3072814964915
A0A0D9R0Y7:S727	LIMA1	S727	9.5874697823696	7.90445702752839	7.55240286609742	6.38520506710195	7.81503339703388	8.17519816157283	10.2359234982135	7.42654883049893	8.83977486971473	9.96766082613154	10.4406947340304	9.83152232297552	9.14694561271905	7.32568103814732	8.4550871038851	4.24673855815931	7.04135453936469	8.1985746599782	9.02362142934127	7.6421962218072	5.07427668004411	9.7280934969003	10.0744576246334	9.15495762227856	8.30345391221514	7.98116266695566	9.00818036486259	8.76618649304934	8.33088776143603	7.07869555805364	7.96431925520199	9.29785337516947	8.83736663835089	9.00831052008742	10.1495050628474	8.57839987218976	8.06009759213593	8.5630541539149	8.38424618754661	7.96369017946697	8.30308057005579	8.49786762157344	9.2817019846256	8.80347150872581	8.76420164994991	9.47228795562428	10.089339493759
A0A0D9R110:S621	ZDHHC5	S621	7.64331251225234	9.16366640050301	4.42921091748571	8.35984325069996	8.56873038466212	10.1769349601362	5.20118161326929	10.1287361527628	9.19994995394211	7.34293783324326	9.72050622092202	8.94716943604331	8.41317274671063	10.2638041353604	9.04040919593388	7.59322571531646	8.27835863662172	7.54931434618408	10.8384677161754	9.84765678157748	10.2223360323043	5.23333706725352	6.89649473113652	7.1997981685851	9.77319339560016	10.8979947366513	10.5772606186681	9.45959031824946	9.46518783031105	8.77908322969305	6.54027814161273	11.6187062942578	10.6602526536237	4.13839526566491	9.14764789105892	9.7830578152192	8.0512835675081	9.34583397400491	9.67709909156665	8.09438538321142	9.39915336218065	5.61819393019531	10.6364967657296	10.431468439532	9.5528480137322	9.19428248156315	9.00843871932129
A0A0D9R121:S268	CTNND1	S268	12.5092224461839	12.0200808573229	11.5518925156052	12.7113412327503	12.8672021127888	13.1943408903988	12.9854864022582	12.7691651788526	12.9700939819602	11.812273195274	12.7961709116521	12.3378656747288	13.6813330316435	13.1983396189993	13.3687094442882	12.838231331176	12.9803275640013	13.2997388454034	13.1139340826972	11.7528282627694	12.2942259943085	12.3147353356037	13.0272474692932	12.1612761304273	13.4282573064054	13.0515171201024	13.4651568449335	12.6243149673427	12.9835866547124	12.8325238507219	13.1750085299726	11.8998859422867	12.2961109426462	12.7535436542336	12.8112463696387	13.2596865360883	13.2790957163943	13.0900298429901	13.4922326703972	12.7234945531652	12.3206239666758	12.553469975779	13.2631563435053	11.9025972527728	13.1147596874951	13.3638301169338	13.0605894329972
A0A0D9R121:S346	CTNND1	S346	3.84283174562753	8.02134052344928	12.0257626199509	8.66429057510353	12.383718285068	12.43819324016	2.39108357540976	6.87735671977485	7.68764348591179	5.02799337989127	5.79999356011815	12.5619855454807	8.78440225785307	8.22642646045519	11.9493759145861	12.5014081983857	7.82696201125206	5.93932891475874	7.23730336910457	6.44581870824504	11.5556047001528	7.93774362614454	11.7612276714588	5.87466823041056	5.25975120705619	10.9855248586269	8.69645328934827	6.6679671666567	9.51464790251737	8.2028229373305	9.14741624365802	8.28265693004962	8.34590759469612	8.1375095745264	11.9008823640131	11.6852716484518	9.04899799325058	7.419578387954	8.91760020274831	12.9537136985623	9.38400232670149	7.71222047674514	11.8954842718571	9.41095427028701	11.8136060111268	12.4604103938665	7.07021358681523
A0A0D9R121:S349	CTNND1	S349	13.6645086186987	14.1052417918329	14.5616304382554	13.4166521035308	15.2210839338454	14.8023636728762	13.5874668851273	14.3096394153247	14.3571374010377	13.6524767412812	14.075090189142	14.5045063052475	13.934993732932	13.9322615322987	13.9748715664087	14.400794120073	14.7648527331658	14.4543998768067	14.1282554309844	13.9510732562316	14.4404357517803	13.6052725521669	14.0533576365478	13.4470331955412	14.185538949299	14.4199590205035	13.5670508964098	13.3674867065412	14.3552446490854	13.9980679996062	14.0232060755536	14.8889100350619	14.7845638458356	14.1122366939186	14.3019955162328	14.3994867128075	13.3384218058442	14.0751818292821	13.6906132621643	13.4154171955593	14.2536454143093	14.0497121795407	14.1783273077771	14.5478042903947	14.8288249436972	14.2129957443489	13.6522629609802
A0A0D9R121:S352	CTNND1	S352	12.4993392939037	6.52255138909827	11.4149012722491	12.3888147596397	11.52622706234	11.4875603749215	11.7967324949132	11.6901956147635	11.8635359611423	10.9753167977754	11.9949565281676	11.9021816764991	12.5418050670821	11.6922903952874	11.4522046848972	12.1144322168052	11.6544477427526	11.6575982757609	11.874805213592	11.7058003241416	11.6860767415476	11.1497926222193	11.2846147768796	11.0355003265762	12.7999294590819	12.1045705565976	12.269829273091	11.7952923403327	11.6090255079651	11.1950906829766	11.9243314689768	10.213499156929	11.4867258364201	11.9275881995536	11.7488117089841	11.6060396299403	12.1966224141838	12.2149189911466	12.3618316278263	11.5272687062695	12.121726589624	11.9541386221525	12.3550431499425	11.5151287900827	11.928155959943	12.4488798109	12.2403166623328
A0A0D9R121:T201	CTNND1	T201	5.84694098402149	6.92401682600965	7.86447191598731	9.10335062627605	8.98893033730415	9.14670395585273	6.48965649988361	9.30962931771678	8.40229916567231	8.6279348546863	10.5176170124842	7.67092073772599	8.39553483296625	9.86636792820207	7.92667482472757	8.76004965231219	7.48025263819097	5.71341458799031	8.35288744408631	8.67800705320867	7.71132902001203	5.37207310585813	7.37678470759061	8.43082255085562	8.96913076373971	10.5289860920099	6.89822642157571	8.21573260639637	8.43912998068777	10.0048897790866	7.79855835080027	4.59730702067212	7.52799735724118	9.66002960811849	10.3047719422479	9.93297943512062	8.37380884188225	10.0447317540616	9.25276725533655	8.43672529191574	7.63185584178112	6.54014435721201	9.55593489882315	8.50940300757368	9.32557124373518	9.89574797929125	8.43517848247445
A0A0D9R121:T863	CTNND1	T863	8.32131833144123	7.41821276240088	5.01529839053494	13.6514046101491	13.5373017439083	13.6619800827097	13.5483787707516	6.8844318123121	8.95272475013328	14.4194112539376	14.7002141982732	8.88388805696777	13.7461031068615	13.4931968917888	7.7459366530705	14.2548093339908	14.3975441756829	14.1497996781303	14.205282344552	9.30870491515018	13.7484869315774	14.0007132380741	14.7555762927979	14.6963191500197	9.09790189831506	14.2546446307819	14.0959345671205	4.98256801301022	13.7454236307309	8.36677789614402	5.62492994807157	12.1687980686465	12.6021346004373	14.4329057838428	14.6523000140358	15.0169319161645	13.7789126701022	13.8211826848566	13.9581303785598	13.7588480530259	9.02607229636099	13.70814617841	14.4068304359828	8.60167803188992	7.74197840213941	14.942826338408	15.2987601532228
A0A0D9R131:S1049	FILIP1L	S1049	7.45339314426369	9.15118278706127	5.87274192134226	6.69669781864549	7.86338776046793	6.55619045025471	11.1980750406586	4.78486050093913	8.41971209811378	9.17909569231687	8.58505434614833	10.3698589763074	7.68069696240891	8.30473496902151	8.97865525590454	9.29433271759424	5.64748295466515	12.0641344248352	9.28191559310359	8.59902577793098	8.42288715849018	12.1042921351963	10.7579924872792	10.2978407677888	9.1340123697136	7.72623034371537	6.78227533356733	9.30300180944707	11.1023341189943	9.42476667806438	3.94628776046993	4.89921804462933	6.90197244684328	7.07794052947655	8.15612726438093	6.1493153946868	11.2077710736472	7.41974799520545	8.91650551342948	11.1338935375395	7.86590912786193	8.49185584963001	8.93693940723776	7.71810028700267	5.3912090912938	9.20088996072817	11.7663336385208
A0A0D9R142:S85	DCTPP1	S85	11.2551729480919	11.8071204053469	11.2288325313016	11.1926846125295	11.5629132177513	11.8788876048955	11.2475680819416	11.9476365349484	11.4330473357638	11.5431858256943	11.8248283495915	11.6819179246235	11.9196874537348	11.5756247588707	11.3235294480829	11.6786795809909	11.7541510166272	11.6492687500935	12.3150506984642	11.5879033290341	11.9456783322096	11.7615566158946	12.1449401400365	11.9761057192241	11.9487384568891	11.8929690683812	12.2029671069973	11.6007585992304	11.6769763339886	11.7596948539105	12.2245179721099	11.5158167693837	12.3816919892176	11.8203360716058	12.1693864763887	11.8945991766216	11.9542895374918	12.0282389470947	12.4324087399282	11.4778044809261	10.9645120278741	11.0356166848835	12.3699350213875	11.5507273830933	11.5636444960719	12.0572928080095	12.0658401688211
A0A0D9R151:S184		S184	8.25950418892476	8.44854696755744	6.92718880006538	8.60562248786094	9.79322246081449	8.66540803438398	9.37483462089127	9.87016736056912	9.35786263157543	9.37364743990726	8.05905701862773	9.19827484240733	6.69250761297194	8.39299713064531	9.2529175728722	8.82206294285567	9.28379003432572	6.41400428376561	9.25807937295239	6.17521835786977	8.62585159363256	6.38152791807632	7.62189663227065	6.95374400896171	9.29129060775695	9.05317715346967	9.96487549944656	5.82902758651253	9.69270077476713	9.85111473817594	8.87051095759717	10.3928342182434	9.3966313683983	9.29118530801132	7.89015245838256	8.25084511909764	9.18674200305163	8.42099578299648	9.27199197483889	6.16967776277666	8.40979026012709	7.46729878003222	8.98764167444282	7.80019073270242	7.9664390674775	8.50070028631722	8.90334644170099
A0A0D9R154:S360	GGNBP2	S360	9.8318110231198	9.55056567085721	10.214772350358	9.6790247747054	8.17831795424711	9.65469481075784	10.5944334245188	10.3822498554238	10.0580743338521	9.44796856882327	9.10637778346852	6.77991709050892	10.3414930398991	10.6426413366053	10.1899463995721	10.4587234434113	10.4405554964272	9.84012318544326	10.331365688478	10.6024296947548	10.6537469960155	7.11315051516968	9.00761508033534	9.33707722142756	9.25256357743046	9.75030859263342	10.2587780963116	10.5036452217435	9.67899622124563	9.82334895103259	10.7224926989936	9.40542131943724	9.68081199235927	8.62400490637253	9.10499777353189	9.62972121397897	9.26845478759087	10.6286543671012	10.2216176709378	10.8721690156491	11.0575440600601	10.418264453082	10.6327881823876	10.0304629513632	10.4409211070095	9.16074656788302	9.75974476778731
A0A0D9R163:S477	NCKAP5L	S477	8.06566571920184	11.4895371588313	11.5889491763939	9.15500280348604	12.2954644650144	11.6400348453613	6.1363977173247	12.0297249666954	6.29073631460681	6.27250097943134	11.0700976716857	8.76977335046832	10.9061653093069	11.4704269556981	8.95754912291913	9.17260747895211	11.4822915238564	11.0293487775833	8.96475893103734	11.9594428016742	7.7541070191727	8.89413169782406	11.8441785619286	9.17795289686041	12.2241549682513	12.0026440069539	12.1851359323489	6.99700870570091	12.1968674695053	11.8209330379894	6.39271386645005	12.4242168438734	5.57158772404203	12.1633283901912	12.3336605017839	11.7697332880501	9.26257435182821	10.8172172201193	12.2160878240565	7.3266360403131	6.91359130563479	5.49304295864011	5.19478926836239	11.726342954316	10.8414288821911	8.62154311624692	6.00367363499658
A0A0D9R163:S498	NCKAP5L	S498	6.91267036610361	7.69455635305501	9.38537229836429	11.9081450189879	11.6616345614046	11.6082685498228	9.04509910262878	11.739307518518	5.69959021110528	9.18253015936477	11.4716032163757	11.5201047298767	11.7514347278622	11.3580801074233	7.99921397880879	5.66335544081091	11.4334573786968	11.5858761823575	11.6430548357726	11.6871153862512	11.6952431659598	6.61762806631804	8.5476214332323	11.7472213841332	6.99850795386883	8.41548574157565	11.4525113111405	9.36489015583089	8.30639480213464	11.3663002045787	8.76031222280375	8.68718654751011	11.4361897819496	11.8739043300324	12.06645140109	8.51563698471277	7.09182024451	12.4860047365162	11.8581323897482	11.1270865837101	8.34678343245134	9.18216249558651	9.45670607673229	11.5990264298446	10.8473507729124	9.1322381639853	7.4678680655788
A0A0D9R171:S91	TOMM70	S91	13.6332861324153	14.771217938795	15.1323185964654	14.5836801086162	14.3574778693417	14.2113553524123	13.0291489497976	14.6238764618891	14.3225156616795	13.95992942386	14.3401886842164	14.2898236792766	14.0881561296717	14.861394839368	14.483724503115	13.634746111054	13.8759164193818	13.7987927332904	14.4509856035217	15.4603703533021	14.8519766714608	12.0926526781981	13.2039217696112	13.2852816384126	14.4803771037001	14.7116271457873	14.3594623984065	13.9307516650453	14.9568145791177	14.8444053311919	13.5797129744507	14.6843275915129	14.4743842196473	13.2531941778638	13.1711038463167	12.894848856465	13.4682604643577	14.4401009449582	14.2211150959433	14.5045776181582	16.4546231231146	15.932321322422	13.8713517133694	14.7995037933646	12.9327715684483	13.9946737793502	15.2399931588869
A0A0D9R173:S174	FMNL3	S174	7.73744351015223	9.25355344033332	4.11948483586049	7.29630260223577	10.774678344735	9.73989361950667	9.06930642621793	10.239615323616	7.53675111848812	7.84509576935998	9.36684114618255	9.24709989219642	8.02522954045577	9.42438138040975	9.21140938114269	8.67032091730427	8.73374812421366	6.09039252012925	9.15141949005651	3.68218054159492	7.7623867513579	6.83133341296429	8.61382325880379	7.7069934539838	10.2022312654699	10.2587159370462	9.87727894814066	8.43129734068894	10.3478040457056	9.68301324223113	8.72188755631582	10.076966140222	10.7698942939953	5.93783828681433	9.78796236289093	8.81499646519728	9.41960207725789	9.45681251154292	8.71137284934758	6.77716178846655	8.64018243624755	8.97752660837777	8.94484796333099	10.1811949323015	9.51055929194896	8.5555028625192	8.41006325867085
A0A0D9R186:S673	TBC1D10B	S673	8.28634633328084	12.6617191784352	11.7236160316411	5.16098172423221	13.4097459472212	13.1950515188879	7.87552427827439	12.6958867864562	5.58216259740459	11.642233153691	12.2252675293244	12.2945523899874	10.7803164749299	11.8995368517642	12.4092581584441	3.17148352808905	12.5013468039249	12.7772690239619	12.1303938395628	12.5516485443816	12.2476661839035	12.0089749976488	12.3337561264107	12.1750124866059	12.8357585668073	12.9586048915933	12.6561286129855	11.7734649074406	12.9028679884156	12.3964205983431	11.3569995591226	13.4331886797549	13.6112466531325	11.8345457518679	12.5683966108798	12.8716001569689	11.2890019078904	12.5201602567714	12.5147776740529	7.77832148376145	8.44775988070949	11.8092436969539	11.6611067984031	13.3123086428197	12.8550887164265	7.46738812361776	11.6979407714259
A0A0D9R188:S29	ACACA	S29	10.9916639819663	12.5157938710224	11.8767999414135	12.4038079653548	13.2696483975547	12.9414444817172	13.0435522250459	13.1278246659404	11.5856026532566	11.736370866001	12.4800154460194	10.5708962295468	11.6291896581818	12.5406011886535	11.3579054044791	12.9620739866309	12.8027206142279	12.3257565816659	11.7995323676756	12.5620225976394	11.959689093349	11.4141809883326	12.8658539739259	11.7127326762984	12.7360520602404	12.7113394045013	12.5579296060686	13.4011973945299	14.1821536998925	13.5805643509836	11.5921458633366	13.105268762591	13.1520122773125	11.1070308002701	13.7316893576242	12.1620497279088	13.1213739376919	13.1653944418704	12.4948245004083	12.4396270824815	12.2674062294846	12.0828643149841	12.9601518441885	13.3969800949997	12.3010599736577	12.9783405632476	13.2512873709333
A0A0D9R188:S80	ACACA	S80	11.2284833545701	11.1114317259341	8.02202662700863	11.4762389874121	12.8864608283631	12.6968611430119	11.3125481880077	12.9996822999524	5.63334577358833	11.8285303306874	9.06961317972115	13.0167530220554	8.99538408840682	12.5720415478429	12.0583715821373	9.91938806028438	11.9896000611184	11.1624049274296	13.1674375926783	12.4993484020607	12.0328202975335	11.5588093603156	13.0469358842102	6.14440231230142	11.626461964246	12.0200950714309	12.0030709553255	10.4181725355249	12.4911296299383	12.2259686766159	11.6634028250606	12.1405231640125	12.26573902877	11.5218879269207	12.4585382338559	12.1196198155869	10.2621245837464	12.1763728310836	11.6743285687702	8.9272868018078	12.2544568374882	12.1311639363868	11.4200202332459	12.026274799124	11.162741581519	11.5763888252941	9.2519088721973
A0A0D9R192:S125		S125	11.4938984175565	12.1737593069788	11.823781178428	11.6443413000142	10.0933723438777	11.1147542501425	12.1497693075897	12.2243326777764	12.3223951713751	10.3193366205789	11.3109151769503	10.8235431120586	12.5541431035625	12.4986758616017	12.3650015598635	11.6613255575122	11.6155919086643	11.0889984296442	12.7034714091134	11.9090698467613	12.4635631328918	8.41010100982152	11.4923442868567	11.1282234357937	12.2251000366385	12.121834776894	12.4552386297807	2.85928735613875	12.151648221716	8.16810068064146	10.1711609124074	13.0787768488053	12.4997352681069	10.1730774457546	8.47969817193091	9.22410073497856	12.3389977125147	12.8393535085372	12.8695105344427	10.8417850138317	11.9403468982402	11.5454822539983	12.9591875567045	12.240159103398	13.1687545616316	7.73765012024461	9.489618327191
A0A0D9R192:S132		S132	11.4938984175565	11.3218937991479	11.7851656061109	11.6443413000142	9.92053165116898	11.2373811589339	12.1497693075897	12.2243326777764	11.7887568650286	5.22654743340258	7.51661886836057	6.66011779581764	12.5541431035625	12.5083784070082	12.3951900582102	11.6613255575122	11.5477629997979	11.0889984296442	12.519063619283	11.9090698467613	12.4635631328918	4.99963672854211	8.31318706257654	6.26545542437885	12.2251000366385	12.5041502652849	12.3361148758007	8.09922993294444	11.871709299479	9.40622921072789	6.18705203465622	12.6954443973612	11.7580422901722	8.64349844657861	7.65873921240942	4.54918404990016	12.3389977125147	12.9194560404348	12.8571748754092	10.8417850138317	11.8175007575376	11.7599382224725	12.4327941904444	11.6650311844923	12.6771045488611	4.78995210097504	6.47913470495998
A0A0D9R199:S323	AKAP8	S323	10.6829119108558	9.94675280471922	10.9840293340803	11.4382557875445	10.8158960270304	10.9702603460765	11.6743607297394	10.3435257709105	10.7717450746173	9.89712845288296	10.3451426275284	9.77198125938884	11.9189483771846	10.80430033615	11.1870787055662	11.2469534270957	11.1803155115974	11.4296792080449	11.0618333059613	10.4266923924933	10.6710556169958	12.113240088502	10.5936744396048	10.5839005301051	11.389679647471	10.7963574376849	10.5843003206164	12.0899335363472	10.8849781352895	10.9198806348216	10.6509220430655	9.84094456575477	9.20005904405756	10.4904032318783	10.0504724684275	10.9842054970946	11.9912803018816	10.9750245085613	11.6339780651637	11.6112412559599	11.1765322981164	11.6404087831074	10.7825913614251	9.72020049821152	11.0164460348764	11.3447607147205	11.1984071572013
A0A0D9R199:S328	AKAP8	S328	10.6829119108558	9.94675280471922	10.9840293340803	11.6283292263407	11.002459112662	11.3602468254942	11.6743607297394	10.6774432801406	11.2980588645058	11.0578724338235	10.9345588467906	10.6910885799982	12.3096224840611	11.1849682925118	11.5336435449883	11.5316153014824	11.4539784522909	11.7083305713899	11.0618333059613	10.4266923924933	11.1505197326049	12.3511855616498	11.1791754689569	10.9757110926528	11.9233871163334	11.0779241127084	11.2562648697147	12.3767530249011	10.8849781352895	11.2181719409903	10.6509220430655	9.84094456575477	9.20005904405756	10.4904032318783	10.0504724684275	11.3415721060172	12.2417759517123	11.3653131807587	11.6339780651637	12.0292865355239	11.1765322981164	11.6404087831074	11.0979616288824	9.72020049821152	11.0164460348764	11.8728322953666	11.4717781352565
A0A0D9R1B3:S282	MCRS1	S282	10.7474530786159	10.8557021458766	11.395438616418	10.3329832964146	12.5110741418669	11.4534875308126	10.2616426865075	6.86764358243239	10.2157104515883	11.5729166852421	11.4244869307463	11.3651824585787	10.6127295248086	6.83882993667692	11.0950218124932	11.774769405308	11.9065507849316	10.6559768548889	9.70712078221326	11.1275299627905	9.5610589926417	10.4131574174225	11.3756532946849	10.4870534731823	11.3540051392728	9.36240910512189	11.2109045290061	11.7047595377275	12.6507118769023	11.9314400829367	10.2021835141099	11.4175057615498	10.9661987980684	9.84626686098494	11.8590134802389	11.0674899084832	10.8583259083274	5.93982259636251	10.4675769610149	10.5667619296837	11.4137618416702	11.2217947433065	8.26713963953869	11.434551582391	10.2069675472444	11.3304178682328	11.7379657015885
A0A0D9R1B5:S16	LRRFIP1	S16	12.4707069365781	12.4476342868452	11.9427035559622	11.8278599588351	12.4731942860846	12.3312988261741	11.479390618726	13.2782621778576	12.857824072922	11.0048539509286	10.9403736399854	11.4758390983039	12.9110343507791	13.2030616598036	13.6226333775568	12.9293072369812	12.7430317388243	12.9006233350815	13.1938899492581	12.3412641190874	12.9976372308946	11.7501821061156	11.4591907889286	11.3183059557814	13.0679107626361	14.0241680034267	13.7051754475897	12.2029521155018	11.7876801265366	12.2180776142189	12.7797926637791	12.7362120100137	12.8417764681373	12.0450382995936	12.113465187604	12.1586955772627	12.6798348834252	13.7554203998715	13.8599230673923	12.3973114376511	12.0937361287187	12.4331345696666	12.7495430659387	13.1213833960467	7.11721534548092	12.1051113166212	11.5470904894007
A0A0D9R1C3:S566	SYNRG	S566	11.3801237392236	12.981543249526	9.48509710717654	9.09085807816158	13.1509239271042	13.0668123665268	8.34958259339969	13.1026580859374	12.7138382008207	13.4400393633213	14.0057644032917	13.8473377943183	7.87646102138872	12.1231102308495	11.7660211569344	9.35608567370782	12.8124909547988	12.6288361291846	8.56159769751953	12.3540995861426	6.17280626428056	12.8520348957842	13.8539222957328	13.6684833427577	6.83075059676044	11.8178873903595	11.5705131389095	8.14616486012285	12.8089948847838	12.8939306511616	6.46443948377804	13.0603504002258	12.8062512927562	7.34032874068248	13.4557637433799	13.7360729276726	9.31850148481802	11.8715085519107	12.0493791647591	7.59771327430825	8.53057411982118	8.01290532667912	11.7383516434656	12.8157370691456	12.4830822948413	12.1448964264275	12.492897912884
A0A0D9R1C3:S921	SYNRG	S921	4.46450400833448	5.69727758039887	6.03550893296024	12.7945362729282	8.36692820996827	12.3772417012971	12.2211741607774	4.46414671349569	4.14753837319769	12.6107008702427	6.05653391349625	7.81105308754359	8.86272810980385	12.585216936185	12.7460159807214	12.7026868106279	8.93293667934151	9.05519871817886	11.9197900667175	12.1584515733029	5.92833360443665	12.0189312205979	8.73969547204304	12.514479554138	12.3781350450743	7.01719066793072	12.3128795866952	12.1625318082258	8.97992944045703	12.4840342145217	9.40335633222633	8.76527658088989	9.0670235783903	13.0316232989268	8.38512631993613	8.68317611011144	11.6522822276017	8.50348966255874	7.44545996282005	13.1319820103606	13.4829116991415	13.3036910693545	8.84282481736297	7.43566687745784	11.5658656464568	12.8195747390983	13.5156650433278
A0A0D9R1C5:S237	PAGR1	S237	6.6379634948343	12.6682905164813	12.0963562421043	10.9420560466101	13.8911547552697	13.762388245797	6.82855161240609	12.989509906986	11.946684612884	10.9897968223818	12.7424142818787	11.8458600897058	10.9365629654043	12.8100143143787	12.1686382551033	11.6641821075371	13.4819958752912	12.1693553547657	12.1486507828235	12.5768739146887	11.914991425714	11.4519993249933	12.3225288001772	11.8362797281339	12.8568464747504	13.5376399805029	13.1004330344733	12.0233683857753	13.158219248757	12.9092607454367	11.6730542771361	14.4455563769956	14.0032404537727	11.9487771712172	13.1328049957317	12.3665504111537	11.5746273274664	12.8974181535164	12.2250740294601	11.5676092698936	12.5208078028416	12.6739431830145	12.1832552390118	13.2570944943901	12.0946430790347	12.0122717782069	12.1976528725219
A0A0D9R1C9:S873	MVP	S873	6.94303862284235	9.4420236903756	6.98011516622263	5.85250771597932	10.8819773371473	9.10483354257179	5.70080809695683	9.68452422444854	10.8925796916706	4.71772840302489	11.0864809156398	11.2584777267842	6.79156402690139	10.4925420581479	8.11189986197773	8.2889812106723	8.63000493214601	5.97051060535684	10.8092493166629	9.69498921528195	5.42024176160716	8.84130261687775	8.29269986190241	7.09979551792486	9.48204296919097	10.9866466651085	6.70361787545311	8.32959678187067	3.05203378036449	10.0785871026807	6.08851896794595	11.2791689934224	8.05659816852615	8.76584076523556	8.76271905110817	10.1762208421201	8.15608732106464	10.3989370091898	9.77935869113636	9.42447517410904	7.86299114918623	8.6785744700676	8.79115220599582	8.7380991033843	8.00328262799898	9.8677201036326	7.50206058429352
A0A0D9R1F0:S384	HEATR6	S384	10.9903710199487	7.31399910247294	9.08268652861356	8.99246411196012	8.63069970559153	10.3747301290248	11.4884760374152	11.6063844426141	10.8935466074576	9.29130567528175	8.80100747325629	8.59886510418308	11.076164306057	11.7356462366544	11.6397463208195	7.15180626302566	8.46550159321811	8.89948738328428	8.09726437273469	11.3949483071413	9.32019001855895	10.7870105221566	8.77230568573496	9.32095325049862	10.8160828879749	11.5313730648654	11.4237039355912	6.20833713050738	8.33383353976571	8.76900260152388	6.76913251104132	7.91016599933836	5.37413213487629	7.37072143361529	10.9427701978286	10.8375893746245	10.7532020598483	11.5471286963386	11.6250707943301	11.1366046997555	5.85674742335019	8.4022679439118	11.0680211527666	10.5265137332301	7.38036308566997	10.350817244607	8.49442468648355
A0A0D9R1F0:S643	HEATR6	S643	7.48940785527946	8.08766009719809	7.76933355032776	6.89816339118742	8.62178015869286	8.79527931870022	5.57804256528676	7.22466347090208	6.16383390175408	7.88623387883407	9.09123416689126	7.8381171233497	5.91473829526299	6.48522244849321	8.85860181395875	7.00414722510747	8.80528869778229	9.5289454627613	9.42174680387632	8.94363286955388	9.16451948027082	8.28909282639642	7.94128003266777	8.83774888639419	8.00252044694017	9.20370638591911	8.88193960842464	8.3279174098463	9.08417727753197	7.97730401831679	8.67558133818693	9.33709122460387	9.33774953647151	9.11747784934831	8.26883370946542	8.7458297505032	9.18984116757066	9.10258281189202	8.39391071697193	2.84690997870955	9.06029939731371	8.97524110827877	7.21416808253583	7.23715349189517	5.75576871972833	8.32256599526391	6.28103443245996
A0A0D9R1F6:S143	HIRIP3	S143	15.3607552982997	14.6579131453835	14.7361331012933	15.231868901914	13.9571480390498	14.5831275948843	15.3992209308598	14.0313490469699	14.3236662266492	14.1557931154525	13.8668525778842	13.7428967019379	14.9636713850349	14.2035607253313	14.7189469147625	15.3506135833952	14.5211118337314	15.1835086901108	14.885584303398	14.2719884763954	14.8913783509111	15.5344633645404	14.3136229944213	14.4962746459637	14.9946264178473	14.0654372081896	14.4774593473537	14.4948037881614	14.1357510530186	14.54546429825	15.2422737710362	13.3054901030274	13.9777588499059	14.2459416809406	14.0531918457397	14.5217110685275	15.2434974747386	14.5828603947755	15.1579917399396	15.1287689228651	14.3919303039714	14.8753246670072	14.6158229966739	14.3517217985856	14.9591738122321	14.901620983576	13.9880082385959
A0A0D9R1F6:S144	HIRIP3	S144	15.3607552982997	14.6579131453835	14.7361331012933	15.2511090031651	13.9571480390498	14.5831275948843	15.4415878836677	14.0894960669821	14.3730068019495	14.1557931154525	13.9464261209581	13.832346429342	14.9636713850349	14.3305903548277	14.7879315568629	15.3651877530472	14.5738970308696	15.1835086901108	14.885584303398	14.3604089313583	14.8913783509111	15.5682422616737	14.3642949315961	14.4962746459637	15.0284783062787	14.0654372081896	14.532378614994	14.536748285027	14.1771983768669	14.54546429825	15.2422737710362	13.3054901030274	14.0469038506839	14.2459416809406	14.0531918457397	14.5217110685275	15.2688214689536	14.5828603947755	15.1579917399396	15.1287689228651	14.4583385623552	14.8753246670072	14.6158229966739	14.4133901598622	14.9828191885656	14.9159553008871	13.9880082385959
A0A0D9R1F6:S200	HIRIP3	S200	15.0727162783637	14.6901388721159	14.4725738821848	14.7239379659648	13.4957916643137	14.6617812036913	14.2034356334354	13.8435496805449	8.63320239820823	14.1904847617373	13.9318028967842	13.9750035589587	14.4147729210666	13.0446038644351	12.7976363123605	15.3024087256724	14.8674102660486	15.3578360115748	14.9115083077795	14.4262048049271	14.9084924894154	14.3201197965676	14.4000230037682	12.386100761252	15.1148410013918	14.4476966017388	14.7753921503138	13.8917490701791	14.3610177183629	14.6559551453521	15.0039847469868	12.9335732463027	12.3306403970555	14.3049662259134	14.1688253510287	14.7334621202473	14.8686614518139	14.6011255415213	15.4263037307633	14.6350236420071	13.9214998626001	13.6989147182406	14.6638074590814	13.9636793329652	14.7599208469881	14.7356568925527	14.8066445891918
A0A0D9R1F6:S227	HIRIP3	S227	10.6107609513561	11.0069992379435	10.4646106358728	9.23596432363559	11.62217917505	11.379692480076	10.0659008598606	11.5524196382851	10.3030970569897	11.7088933828386	11.8161096321722	11.223439508038	10.5938007580541	11.7757116879417	12.0265902135699	10.5729371810607	11.6485614959651	11.3474399052018	10.5238236488961	11.1616724535107	10.8986936865464	10.7916166201088	11.1393884628155	11.7131620686502	10.7513186296777	11.4125950212067	11.6263950694347	10.8692828631412	11.9980010151304	11.7991311470726	10.4072337993399	10.2848926768622	10.2749772661688	9.93430803581549	11.7538086364291	11.0742225529842	9.94264702765389	10.7021159855347	10.432834759524	11.3821165400556	11.7894768397716	11.711524097646	10.5057679254001	10.5919536677088	10.42847376519	11.3767346105166	12.1427181442386
A0A0D9R1F6:S371	HIRIP3	S371	11.1017905464694	11.5623621895821	11.675151558135	12.0114082171572	11.5983162892529	11.345842767416	11.4572060221605	11.5956799845596	10.9689282948203	11.6799538156292	11.4302558064058	11.2574881608757	11.7124140879811	11.4662994600958	11.6174345488361	12.2394460402954	11.8754434211449	12.1111641844271	11.2671489544169	11.6446738955403	10.9984397973388	12.0448175052082	11.0288599376006	11.5397731882132	11.5318258177122	11.3588489319034	11.0574774827654	11.6834778870695	11.2400414655736	11.5116856089355	11.4703796585048	10.3537694754015	7.56186109116598	11.1370962278136	10.9093543631806	11.3300054498283	11.5030929050706	11.2312281909568	11.7924148803137	11.9209732603318	12.143063828492	11.5049069106675	11.0353683140415	11.0568192241383	11.0766603964516	11.9605181562707	11.9934409206683
A0A0D9R1G2:S439	TUBA1C	S439	16.6124403951842	15.8387907004142	16.4146251892423	12.5909376648538	11.7827431756775	11.8263747897481	15.8982779225848	14.1652210141501	14.63401736329	12.1515018470331	11.5055728599849	11.8465162808375	13.955013746766	12.4961026404775	13.1946060556689	12.9459875709226	12.3276616656567	12.8511167553184	14.9182787030869	15.7802021897919	15.5375538702557	13.5873786470506	12.3177594011635	12.3716812260946	12.9736923468864	12.4921949232168	12.730221386095	13.2548496790542	12.2108020821236	12.9500344450079	15.9755264565417	13.9159123350204	14.822087237391	8.70607352189343	12.087531205631	12.7134849822831	13.9149797998061	12.7599260307636	13.3224404980105	13.2897942449597	12.5804029911192	12.9118960912474	15.3334015155115	14.9429599435357	15.9088191601002	13.0613790690442	12.7877724485878
A0A0D9R1I6:S2285	KMT2D	S2285	7.59909942776524	11.627111907339	12.2157142182938	10.0237899780909	12.9305713683664	12.6567174448408	7.91714558314016	11.9723408585187	11.7555958954488	10.9135806607344	12.2318094776369	12.1932877946153	8.4668825777029	11.9230678639531	11.687241620666	11.5986576235233	12.3591782863965	12.1038114676096	11.355091951223	11.5752703398585	11.3052499428184	11.4183533645232	11.9514806126581	12.0517736790393	7.90505070727651	12.1295147743549	12.2035596240945	8.61788880503735	11.625218117877	11.9677332361635	10.2817623160282	12.5791502564454	12.4284152166127	11.9527251396223	12.6463089381452	12.7879615643825	5.16274721534524	12.0361712622469	11.5207145550079	7.72091774912486	11.7515102998381	11.3189455118536	10.3405775030204	12.2659992072641	11.8893462759145	11.5960599313302	11.4012661466912
A0A0D9R1I6:S4366	KMT2D	S4366	4.907891260681	10.2536676828171	3.31465538291129	9.05928215009575	10.9440320133181	10.9915500710299	2.02120046083268	10.3812237283604	9.63035587212127	9.75549439270474	9.07837854887997	7.79626097450484	9.02548629203756	10.1295472117843	9.44613273994008	9.05749847050313	9.40932627891783	9.34211273705548	9.56287181467615	10.0881272072575	9.65591780226223	9.8127652400873	9.27799746362106	8.99759595111602	9.18212454739304	9.65560163710839	10.0834559939156	9.66879486625977	10.6718838908237	10.037912103633	9.37242015947096	11.1295439030399	10.8383147573902	9.38307739403461	9.96939904056893	9.65975790602706	7.51379922843951	9.92067868014084	9.66878136141476	9.89872570476893	11.0575296435983	10.7041075145811	8.71982076868237	7.59196333189504	6.6342565940057	8.61210805514627	9.85555052459125
A0A0D9R1J1:S707	HELLS	S707	5.9942024430752	7.414974160601	11.7315696492292	9.10737050796578	5.75229572074244	8.89694373353229	7.95850914153474	8.03869645378277	8.71448226528047	8.94461248068211	5.56977684374542	8.75705729772329	11.1909355916988	8.93555797443478	8.48454867070964	8.55384265471819	8.99294378469398	7.98736276279276	11.6434813656086	11.20553442776	9.35862319972035	8.15417843702336	9.0561417152214	8.45169451303184	7.52915765736615	9.20409442547728	9.80402982315092	8.91905955547629	8.96501216051056	7.97200793223957	10.9209142630135	10.1564397741734	10.9119257405601	8.30305771361745	9.09890513296563	9.32230690969919	10.4965663501533	9.52625363809558	11.0919931588579	7.88280910930687	9.12967953670211	8.57142094195472	9.64131950636899	8.73556554278276	8.51357246573647	9.35537429890979	8.75482367506215
A0A0D9R1J1:S708	HELLS	S708	6.75985098179707	11.8645762461878	8.98045571328371	9.10737050796578	8.59802712445542	8.79509113727883	8.17843885114258	6.3007486398031	8.71448226528047	8.94461248068211	8.18200017946607	8.75705729772329	9.52307583621217	5.44011271224784	8.48454867070964	3.69104799840561	8.99294378469398	7.98736276279276	9.6385214153772	12.2834719115312	9.35862319972035	7.12922281222605	9.0561417152214	8.45169451303184	8.3979021612087	9.20409442547728	9.80402982315092	10.2567414908588	8.96501216051056	7.97200793223957	7.76802116703871	10.1564397741734	9.50565437855663	8.30305771361745	8.57110421030309	9.02506581268498	9.38608529731012	9.52625363809558	7.43168518886966	7.88280910930687	9.12967953670211	8.57142094195472	9.64131950636899	8.73556554278276	9.13327820725987	9.35537429890979	8.75482367506215
A0A0D9R1L9:S349	SENP7	S349	9.75550487542839	8.39402134613856	10.7944487723744	11.9583197303714	10.6665090092429	8.89877405117061	8.33673709642682	10.2572507242584	10.6526990027005	11.5411031804341	10.6775571679234	11.3185217950078	10.4025573867011	9.03461588866606	10.347154192427	11.9124416177994	8.870486755482	11.1223621553194	6.89937637729793	8.1832165969706	10.9688505897336	11.9508318423738	11.133791583435	10.8746862614198	10.7674351734848	10.4889647644692	10.3997800791544	11.6173421181757	10.1212059007447	9.0426491757297	5.6390611693144	8.20482809404502	5.98003600319459	11.6155781520909	11.3744101766774	11.6148305242325	11.283422959259	8.70368252089618	10.8131788434156	11.7125871059145	11.1503697513675	11.1146279534657	8.4560272321467	9.84064362812079	6.86593513090374	12.1389314273584	11.5010997616095
A0A0D9R1L9:S350	SENP7	S350	9.75550487542839	7.95004331318845	10.7944487723744	11.9583197303714	10.6665090092429	8.82675569706552	4.73822611605282	10.2572507242584	10.6526990027005	11.5411031804341	10.6775571679234	11.3185217950078	10.4025573867011	8.09159670365589	10.347154192427	11.9124416177994	7.49765074916513	11.1223621553194	9.34574530823656	6.65212142591645	10.9688505897336	11.9508318423738	11.133791583435	10.8746862614198	10.7674351734848	10.4889647644692	10.3997800791544	11.6173421181757	10.1212059007447	8.96034726117388	9.13426288252595	8.95079845731317	8.51520603835199	11.6155781520909	11.3744101766774	11.6148305242325	11.283422959259	7.7597808695712	10.8131788434156	11.7125871059145	11.1503697513675	11.1146279534657	8.49064470665138	9.84064362812079	7.91453456824742	12.1389314273584	11.5010997616095
A0A0D9R1P0:S80	CCDC86	S80	15.7861437059015	15.1255501432764	15.4771759318497	15.3913150513295	13.9683154119938	14.2944131836104	15.7129856523586	14.4596601879874	15.2606542646192	15.2584997561267	14.654738976393	14.7138369898156	15.7254511690997	14.9324166051335	14.9906857899933	14.9586817386587	14.5260546765278	14.6246370987022	14.8137306772748	15.2631115753472	15.3070569347591	15.3393283506028	14.1904202711912	14.6212719585846	14.964207482136	14.3210266737565	14.4636515166553	15.3492073805665	13.3070410759777	13.9955091585252	15.813117406861	14.357100800035	14.6806244187209	13.9768594191153	13.6571458961187	13.7056651742823	15.6997709380287	14.8615443947025	15.4602982780979	15.4791887170732	15.2767340523382	15.4241830837429	15.2893495145723	15.0742779718477	14.9013762577236	14.581504645526	14.2782364883835
A0A0D9R1P0:S91	CCDC86	S91	16.6589178996009	17.1848253845591	17.213183357882	16.201387432454	15.8897001722868	15.9114720936844	16.3546450779999	16.5164681031613	16.8706220411982	16.5456836627154	16.1037927704052	16.1608810127733	16.8301970188854	16.4281054385476	16.4699399293023	16.1622698566646	16.4032427357188	16.2125813644127	16.37428860038	16.7712450683175	16.812953631019	16.1181317709392	15.9008350668896	16.0695173459294	16.3569399950079	16.2056550926855	16.0380591981609	16.3925391605192	15.0356418721612	15.8612359057943	16.8445378891646	16.3029594534767	16.3133422519339	15.7030246805443	15.6933291662768	15.636095717266	16.4398398934039	16.3729196819928	16.6361668704315	16.4782911534167	16.6718000016407	16.7130468177056	16.5348911689761	16.8701814523092	16.4185659920163	15.8451320450689	15.7881342857107
A0A0D9R1P1:S246	SH3BP4	S246	8.12379265643341	9.34697798401629	10.7928599967425	9.67293899557393	12.0993525161918	11.8076757786006	8.17633671484847	10.8161033522515	9.38212253849129	11.0153272187562	11.5394755290061	11.2173371308089	10.5324724907847	10.7247311763044	10.0512923386885	6.69408036257131	11.1691083671174	10.2327740262848	8.67652023722158	11.1963302235126	5.31451749129196	10.4747077699454	11.6762023240649	7.77370446921228	11.5614193439687	11.4683018061425	11.4254425394238	9.26507492000328	12.9080382002819	12.4837012157542	11.2531250635602	12.7690294566828	12.3610444482881	7.92476654895366	12.5233164678877	11.4917624761357	10.7221871346604	9.3165182759377	10.6133853225977	10.7493023311392	7.70549267872386	10.2783903466657	12.0585232051133	11.838722489876	11.2775943270056	11.3975102706765	11.7817527370618
A0A0D9R1Q9:S1049	ZBTB11	S1049	11.8443796179486	13.306317784414	12.8942621694235	11.7324651445297	12.5107172739238	12.4354241164104	11.6723235321029	13.120552898929	12.7186441982435	12.0777582577612	11.9390727697162	12.2678991652747	11.9170112719163	12.3357881902946	12.2809616355006	11.8722029752519	12.5772409287101	12.7472201828941	12.8054177268701	12.8706762946497	13.0058436099698	11.5253511355533	12.3169377007694	12.0714715954453	12.1121898057084	12.7153647274636	12.5149207212745	11.6639436972632	12.5246312335406	12.699106186173	12.2430429443248	13.1069392123652	13.1726965206409	11.3941597909812	12.1224567255968	12.267338172722	11.5608456157022	12.6345343812526	12.7179210671334	11.5989518170602	12.723958869258	12.4251703504153	12.0522600601247	13.2099271779648	9.77015804356028	11.9000737989691	12.3311329452102
A0A0D9R1R3:S332	KANSL2	S332	10.8276102390073	11.0260810155899	11.1013696369655	11.7324701470501	11.5373412949519	10.7457187547279	11.5814308756573	11.3155178669756	9.86053053737285	11.9722346175597	11.2149781797168	11.0110103816543	11.5605247707151	10.9330900462847	10.5878677492709	11.7729966276516	11.6099435137973	11.0360931707627	10.5061587882442	11.9102720397622	10.4820914501061	11.333563691222	10.9109869702259	10.4723521517112	11.6633969946577	11.7605879725526	11.2056290112678	12.1059423291255	11.4805517888628	11.2165255047433	11.2615694708031	10.9952731840235	10.8335884384972	10.6747334652191	11.2925481875079	10.7043985787342	12.2078264927813	11.4597501564387	10.8071751096535	11.8805538386702	11.5060854559417	11.5215131697419	11.0938982448438	10.8875951254959	10.5016130378423	11.6591768274673	11.24045844069
A0A0D9R1R3:S334	KANSL2	S334	10.8276102390073	11.0260810155899	11.1013696369655	11.7324701470501	11.5373412949519	10.7457187547279	11.5814308756573	11.3155178669756	9.86053053737285	11.9722346175597	11.2149781797168	11.0110103816543	11.5605247707151	10.9330900462847	10.5878677492709	11.7729966276516	11.6099435137973	11.0360931707627	10.5061587882442	11.9102720397622	10.4820914501061	11.333563691222	10.9109869702259	10.4723521517112	11.6633969946577	11.7605879725526	11.2056290112678	12.1059423291255	11.4805517888628	11.2165255047433	11.2615694708031	10.9952731840235	10.8335884384972	10.6747334652191	11.2925481875079	10.7043985787342	12.2078264927813	11.4597501564387	10.8071751096535	11.8805538386702	11.5060854559417	11.5215131697419	11.0938982448438	10.8875951254959	10.5016130378423	11.6591768274673	11.24045844069
A0A0D9R1T9:S441	HJURP	S441	12.6522643477586	13.4292164138718	12.7804947626528	11.6856953638765	12.8870935590217	12.6967148455823	11.5101946895113	13.201090913193	13.1129006586951	11.482375309508	11.82014685543	11.7751984641868	13.2357310858761	13.0099131292607	13.3025926981626	12.8440974433096	13.0480426500453	13.0352020701472	13.1758701146511	13.3750659229097	13.5740358739721	11.2582671373087	12.1721363653442	12.1589740258448	12.8997942663429	13.7617287985792	13.3906864309667	12.3903406608	12.9312063297036	13.104121877772	12.7587672710848	13.6267140791008	13.3447103854967	11.8900780248258	11.8754102034487	12.2982417183543	12.420729044902	13.2569530060145	13.643513519554	12.1300281739112	12.0301717861933	11.8155292706693	12.8704587758431	13.3797024862483	12.8028274584781	11.9813089473347	11.4298811928947
A0A0D9R1T9:S466	HJURP	S466	11.8857253339146	13.3399047240886	13.2858070410138	11.6315374868341	12.6638132290084	12.7432726281638	11.7637565088362	13.7008650136645	13.2993118946556	12.0218679852067	11.8960292403357	11.9746618509834	12.816884022523	13.6989398075118	13.3671363564917	12.2599129133543	13.1385365971115	12.7980317486166	12.8979736704479	13.362657206911	13.5566365321675	11.4607059650713	12.2070498531085	11.8118039012	13.3558824362067	13.8379179351866	13.5304309813492	12.2452904006032	12.8859616871993	12.9667031327418	12.7107298447108	13.6579237981937	13.4993819095747	12.2004867660719	11.8919303641364	11.9580515865947	12.4838741649973	13.6051229747407	13.4220040612246	12.2512505474092	12.685456369539	12.546749480578	13.1499399716237	13.484084669454	13.7931998645463	11.9325175225301	11.6469092651192
A0A0D9R1V9:S247	ATXN2L	S247	3.96945624384091	5.70988263534987	9.86908469338777	10.794352684165	10.4898194713316	10.82115823418	9.07360561156512	9.15740901946888	11.7749300350066	9.18582598350215	6.10651164048526	7.68439040526025	12.8242323289463	12.5993198165548	12.9983349125113	11.5817950734513	5.03567503131894	8.29860659655529	9.38642588222531	10.7978304205989	5.69928891146235	6.9716632148995	8.5700321303819	8.41276522161743	12.4436375334492	12.38515899659	12.6672808489987	7.69355757557159	10.5534929755347	11.1507887862833	6.70043806593984	10.2925962207207	10.9697641250696	6.64435569626468	8.16645244430583	8.95016561004575	12.265062158808	12.3200582484353	12.7698038652374	11.5845941573568	9.35493934546259	11.3583193806271	9.34861050184204	10.7748439326653	11.4770163744293	10.878014935659	10.7416029816826
A0A0D9R1V9:S52	ATXN2L	S52	13.3899631994852	14.5979139486563	15.0974937191016	12.6275401879528	15.3656400309258	15.0169507920706	13.7648696433332	15.3084344226686	14.7403054470159	15.7104536157984	15.8638440284921	15.5647562118714	14.3604181445084	14.9127628702873	14.4948013021625	14.1571069291775	15.3971323987724	14.738586241605	14.718511961078	14.9412884781218	14.7296940652378	15.0885784885825	16.1288213315304	15.9225315838457	14.2888094919266	14.4748927564834	14.7642431112149	14.1338516227153	15.0076429820113	15.2178311921635	14.5818172556757	15.3545277949785	14.987255335659	14.8693467296096	15.8532769874905	15.9874704857731	13.8133137107571	14.701382889241	14.5492907902574	13.5125847742489	14.0546286174123	13.9094557317549	14.4938034388756	14.993738469931	14.7989567228284	14.7721861557971	15.0918541129535
A0A0D9R1V9:S535	ATXN2L	S535	7.69910663262069	11.9039595076047	11.7473280756543	10.8574139413712	13.2741431512971	13.1358883503418	10.0697754547616	13.3954651042904	12.6706786343945	12.9607101964238	8.1295743321757	13.4753389629687	12.1534283079376	9.2357962814383	13.3238211288239	5.87069674103077	12.5894003192095	12.4693025249651	12.0020735849503	5.94351073626348	11.9397856926976	5.86292144264916	13.1652204257252	13.114651045561	12.5585543236013	8.25453208751483	9.43316053680706	8.0488982604732	13.0722616168683	5.46698341144383	10.8428941950474	12.384161168283	12.5175401325553	5.71763597858949	11.9805857009391	11.7208674237623	8.57524624175249	12.4519817894697	12.5559440922459	11.6672851350976	14.0702404211279	13.3497242228549	10.0974102690605	12.1099617452704	11.5914641152307	11.5482557220544	12.9293590948879
A0A0D9R1Z3:S562	PKN1	S562	8.99366710777732	4.15417240733981	12.9364210682538	13.2335071064991	12.7502502779641	12.8456361385641	12.9140344386031	7.3232629552556	7.78426615849129	12.7952153516495	12.482518097866	12.8735999051777	13.3626362366663	13.0417678871277	13.4873555772994	9.16906416570988	13.2305249694371	6.38643370723121	13.1833966904386	12.6028893730872	7.68092039963291	13.5114223006859	8.66625613788693	13.0710902280409	9.39268354307911	13.4448593027389	13.4742829112239	13.4431784704861	12.9609404124861	13.0058384241771	13.5191937840411	11.8503854629053	12.4945038363078	12.2727149208554	12.8424221381521	12.859109895403	13.8223128221986	13.633638135892	13.9903918646074	13.4045253426338	7.09642269615408	13.3054284765374	13.416661270966	12.6909367472989	13.4067803140522	13.3471348546923	13.1483079374669
A0A0D9R1Z3:S918	PKN1	S918	7.19954609646331	10.3320272982313	9.94790453163664	9.67904298807531	12.2553554802055	11.40255077989	5.71948107769312	11.0030947456435	9.44756134278495	5.41028532795786	11.6273127353404	9.36124162618195	8.65341374150025	10.3585551560169	9.1603320695866	10.5314199631735	10.8358077980678	10.6577387479523	9.82166142708212	9.33977549752938	6.48888335045886	9.06003283955029	10.9625296282941	10.5251502526391	10.2600029106443	11.4277747566093	10.9454781079286	9.13202634808093	12.8038729592483	11.6720306604215	8.02656757320811	11.8181545025426	11.591709726117	9.83275579055446	11.8676601013275	10.9171642255675	10.1596866023081	11.3788654711855	10.8545433442809	9.91925815830382	10.2175800237494	9.75547002118285	10.255188117127	11.3366929581615	7.39823615008749	11.0290424583055	11.0330545174299
A0A0D9R1Z5:S253	NFATC2IP	S253	5.18119021861643	10.3394451973065	10.4978220100704	8.85007105397478	12.4856117985235	12.1042845469742	5.08588750765765	12.2000110609481	10.6674160008922	7.22034876828304	10.8850862621946	10.62143393871	5.41176780997984	10.4851243089601	10.634933888294	10.1263469050916	11.8414802650244	8.27033448166875	10.8153051412002	10.8942458770587	6.00482950032702	8.35757307587738	4.41829389050315	9.88053488495607	7.95133775382248	12.0536292320411	11.7091253464312	7.87656178287307	11.6745703418882	11.3287664699183	8.19176710276066	12.9873281054691	12.5762309423265	10.3003329338559	11.2860314447292	10.4209613386779	9.3962602261817	11.131484572187	10.4704249166695	10.1221022766698	10.9381540532984	9.8016614491212	10.9424918450601	11.2375350487062	10.8461895801211	9.31986348399387	8.95573262880949
A0A0D9R217:S268	ATG16L1	S268	13.5102820422237	12.465873334066	13.4655994478396	13.9085915875558	13.4373965292259	13.5473200387124	13.5462506744	12.8336368354782	13.4808746620872	13.9212097290332	13.4572160736657	13.6666337106708	14.0257624961761	13.4661374674113	13.7651107972185	14.1302975331229	13.9698879114082	13.9595234015252	13.6248208062826	13.21025855468	13.1991928253955	13.8704175884342	14.0042734992192	14.0490421233946	13.6909597942037	13.5472704206531	13.7201094133285	13.9785874573726	13.3504852076951	13.4817658647238	13.8583607025993	12.3587788195332	12.5533948633049	14.0475680332938	14.1027516306046	14.0781979806093	14.023530860449	13.6854480471801	13.8950312501213	14.1455783740777	13.8951355605314	13.6075526975005	13.7882756157101	12.8219910896295	13.2206250788514	14.5350206357603	14.2812036530082
A0A0D9R226:S197	LAT	S197	5.12685032971044	10.1711693947056	9.3939987782703	6.20887495973516	11.4373005081688	10.6609480083066	8.39570736391013	10.109394809847	9.08715790436544	10.4292228504247	11.3602239838424	11.238558693861	8.81591517891832	10.0938989247922	9.33415078278318	9.37922952273681	10.0829175653739	10.2316084265662	9.6056015921198	10.9047588172778	10.4171793004739	7.21963513540234	10.6561109072699	9.1757473034687	10.1294021739769	10.481012066149	10.5022516958987	10.0858823711786	11.9579241858765	11.8460410962606	9.34365612787073	10.7263058124064	10.6936821788979	9.65426448768347	10.5519220920136	10.2626560106035	8.49691136047014	5.87302442002444	10.193040061009	10.3497870515178	11.5375278001584	9.79406437521907	7.34487519217291	10.7792707020902	10.226691810047	10.4990974407538	10.6538677729855
A0A0D9R226:S84	LAT	S84	11.9382796321948	13.5053771945269	13.7463308007874	13.9698604431557	13.7529659330846	13.6823940749267	13.4755771487534	14.3479047772552	14.5783988380609	13.3792457917298	13.9266468914304	14.0353165411552	14.1592573592643	14.108308758623	14.1071353318799	13.5888168821656	13.3726549325951	13.6349792725506	13.3531058573318	14.9894350524764	14.5847153819459	12.9643312213642	13.6352266878263	13.180023493062	14.187414311156	14.1076223129685	14.186627668214	14.0715379660969	14.2757283479525	14.0234577579184	12.9646496710608	13.9903680501873	14.1348778722959	12.6439061332677	12.9861162200118	13.5085383320051	13.6262393290492	14.0748131389195	13.9505481886059	13.5855906461945	13.7228870085775	13.4662729913732	13.4995678623605	14.1828205974465	14.2597114114992	13.6607079103486	13.8408122341136
A0A0D9R227:S14	PSMD11	S14	11.4774855848978	12.17148545611	12.2221453407223	11.6044826704517	12.9021930504174	12.9912226474048	11.7131988589002	11.8334731594838	11.808183601811	14.3590441701731	14.7852964591257	14.7248343627066	11.2459545304835	11.3941997820027	10.5065054607056	12.1943838821972	13.3876962586536	13.226924608716	12.711496012235	11.729737258064	12.209472817797	13.9205939981805	14.8432007709296	14.7758825400234	11.6322581252837	11.8779633389028	11.7616166353242	12.2948468135437	12.719103029115	12.8872315318792	12.2240651218126	11.4660271094191	11.8098791442524	14.1615360694204	14.7653697389068	14.8490588580393	6.35902252298852	12.3181169786073	12.4733478190797	11.3602003281341	12.6681697974243	12.5125317624662	11.8178258097447	11.6139430993384	7.57268060922173	13.5941341381063	14.1568027764803
A0A0D9R253:S411	ESYT2	S411	10.0793882526596	11.5379071151283	11.2894709720799	1.61000755335627	10.5054417988308	10.6936436433554	9.48617016526971	11.5435047099033	11.191235297423	7.20434254288689	11.083861027077	10.741143959044	7.21965515434753	11.6182023162815	11.4632764490172	10.4248327799687	9.80381815815133	8.65450832739966	10.7740117581596	11.6894735628805	6.94343493818652	2.31986358910965	10.8397656430123	10.0870654370412	10.5970129430345	11.5782624535462	11.5548506712854	10.6663905680902	11.5115148657224	11.4478394753256	7.61148392051712	11.5438357187054	11.4455169364999	8.80237351705977	9.12877398994419	7.83738794094561	10.4731895940184	11.4557771633031	11.3346200077611	8.70260006949526	11.7573158856183	11.2631131732694	11.065270121545	11.1462249575596	10.995086374688	7.22261771100649	10.9025918047076
A0A0D9R253:S426	ESYT2	S426	7.679151051864	9.33848169839938	7.44984265000829	12.8413905736677	10.7375795143753	6.38440780873727	5.78180879372347	10.4747493254425	6.20566904899829	9.82299537563627	11.2833502468386	8.16098712945692	8.12674807226498	7.3361611379678	9.85414025472336	7.61657664507417	10.3565781985789	7.63823124617377	9.33212486512496	8.28664504484134	8.90793162505524	7.29871562432499	7.65649929474634	5.91552897871869	8.14017489754822	11.2850723033702	8.91520731376207	10.9294055453748	11.968501276389	10.9623034006174	5.68207052943335	10.9404748648851	10.6691494919435	5.12906454739255	10.8512720828575	7.88852590494661	5.8166130807824	10.7170443281931	10.0343945251563	8.30774479023098	11.0910477612807	10.9616486062932	7.9917028674375	7.88737419517659	10.9459586781904	8.49357887807808	10.8178064507242
A0A0D9R253:S429	ESYT2	S429	5.17591713896677	8.9978846250997	8.92563775261988	12.8413905736677	10.7375795143753	9.05417231994508	9.44170354848474	10.4747493254425	8.24635427231873	9.82299537563627	11.2833502468386	8.65171130506276	9.25269096634177	8.21948607302706	9.85414025472336	7.47755240817875	10.3565781985789	5.96570607136302	9.33212486512496	6.46623093299536	4.85655161511821	6.40087023184954	8.90197827977527	7.77741578333302	9.00184275566663	11.2850723033702	8.8954013367674	10.9294055453748	11.968501276389	10.9623034006174	11.3137303703438	10.9404748648851	10.6691494919435	8.08368104845898	10.8512720828575	6.34462211197735	9.29387302233478	10.7170443281931	10.0343945251563	8.56259282325553	11.0910477612807	10.9616486062932	6.56566678334146	9.24858022141474	10.9459586781904	8.5794250874423	10.8178064507242
A0A0D9R282:S1611	GTF3C1	S1611	9.34005798289818	8.04371309795036	9.11114079765601	9.17341574008437	7.95270287547322	8.67830810087235	9.00087580653302	9.33928163719837	6.05716882736102	5.04995706057968	8.36410783595755	8.25125224860219	6.32957324158385	9.30344016817272	8.73353931209732	8.63122740906998	7.5791304610088	7.88684265703631	7.14995077633691	1.8676521883221	9.04243058380668	9.07195452755502	8.88654879944377	8.10799643152363	7.67295574592328	8.4552774664418	9.1211260170846	8.8822968348886	8.23157551193075	8.31896426017809	7.6794017748554	7.02676644072532	9.02963191191271	8.52933397962968	8.64454777919682	5.59548032800522	7.79581365725161	6.14819163975779	7.849825119244	7.93481117488292	8.01840874099601	6.97750947717749	8.33819054452477	9.11444564460802	7.37410558894416	8.83541470743747	8.28873026373969
A0A0D9R2A7:S26	GIGYF2	S26	10.1950095549434	4.42938271710211	12.5830398763505	11.4667089695748	9.01338272252752	13.8707988629074	8.80876387122305	10.2539764223572	11.9861078884091	10.934992288574	11.6298069767142	12.5614185725682	7.94972518501326	12.9773444612978	12.0044136737495	12.6434652387508	9.23652467148479	12.5998257438015	11.6123032650335	11.2179314414565	8.36708694783135	11.9986053216265	12.4612747028774	12.0086161179638	9.45402491290404	8.86419444552649	12.7601134755175	6.71556432295943	12.6719644503256	12.0355590682417	11.4272808299527	15.0314441762787	14.6513638642323	13.0289900686773	7.33331897598093	6.8975353417791	7.82171803868926	13.1909298336439	11.6127235027658	11.1969737548291	12.5445954027374	13.0335705396825	9.49386765342065	13.3471808380748	13.1369254037821	12.2358287135825	11.9428405491323
A0A0D9R2A7:S30	GIGYF2	S30	7.77318203254929	4.71366172670266	5.79345701041451	11.4667089695748	4.82471969668204	12.4834629960629	7.64183004760461	5.92503286832323	11.9861078884091	11.4732030523673	11.6298069767142	11.6852286702521	7.86334433849428	12.9773444612978	5.41666533772885	12.6434652387508	9.38622568712137	11.095501971322	7.06026385167915	11.2179314414565	8.07906229122145	10.5338275978908	11.9520058767945	11.31361873158	6.51969869432261	9.05547478546957	7.05071796168156	9.26207343401393	12.6719644503256	9.1041687672133	11.4272808299527	5.46388282672203	12.5343807265474	12.4880408727613	7.88909086013609	9.23026470651391	8.46891593058386	13.1909298336439	9.16627189971501	4.17807342552851	12.5445954027374	12.162426675769	8.94716876387659	9.06960126943772	11.7742937541172	12.2358287135825	11.9428405491323
A0A0D9R2E5:S44	GTPBP1	S44	15.9677555398446	15.3292998019637	15.5980349975313	16.5082801898572	15.7732845857782	15.3276466796559	16.5618395872359	14.9304065297176	15.3575601300443	15.358263716233	15.0505068941025	15.0010342432276	15.5412124855425	15.2700311776517	15.378599808279	16.7026692930782	15.6490111447809	15.2240168249214	15.5855174202143	16.0685819703246	15.5947446242205	15.8263347822048	15.3123122733452	14.9065238530198	16.4907460104042	16.0001294113018	15.9206858356973	16.5396104648981	15.329473844201	15.6708234829498	16.1372777957317	14.9443627874346	15.3989324665585	15.6192502559851	15.6837893190751	15.2411327303459	16.85403720152	15.9520777790835	15.8739311604917	16.4424567485128	15.7595421024952	16.2726463020016	16.5025502259771	15.7844416793101	15.3152377625632	16.3073660081487	15.5768145019471
A0A0D9R2E5:S47	GTPBP1	S47	15.9677555398446	15.3292998019637	15.5980349975313	16.5082801898572	15.7162505113813	15.3276466796559	16.5618395872359	14.7690349040992	15.3575601300443	15.358263716233	14.91276560046	15.0010342432276	15.5412124855425	15.2700311776517	15.378599808279	16.7026692930782	15.6490111447809	15.2240168249214	15.5491095752996	16.0685819703246	15.5947446242205	15.8263347822048	15.2167735585732	14.9065238530198	16.4907460104042	16.0001294113018	15.8776977502873	16.4933457743067	15.329473844201	15.6708234829498	16.1372777957317	14.7816461429144	15.3989324665585	15.6192502559851	15.6346993263891	15.1730379830933	16.85403720152	15.9101201147379	15.8739311604917	16.4424567485128	15.7595421024952	16.2726463020016	16.4712353806889	15.6752705478454	15.3152377625632	16.3073660081487	15.5768145019471
A0A0D9R2F6:S277	INCENP	S277	7.48987636940256	9.31824396193134	7.31816127001164	7.65655031292585	8.94494331899076	7.31851519811367	6.70915009511846	7.41879469122573	7.48889456150705	8.28157721181022	6.36684236536448	7.49541955495226	6.75793248547334	11.3885458940586	9.12162034827582	8.99891514332147	10.4444818719478	7.17427720900857	9.05137911899439	7.67891120108153	8.12042427691862	8.04453266577733	8.9092158179834	8.60105549678961	11.2296004728385	12.3081237126583	11.5207093973165	9.77852321838478	7.4357468553314	9.36223984394463	7.1065306405895	6.48776144158927	8.00894137498079	9.32991636518106	8.20149040520853	8.75453513169523	8.6245029895448	9.20787115579787	10.3891636068906	7.39404082731282	8.62635277332772	8.18824590701994	6.93120081210913	10.7328160224844	8.81297382291279	8.68576766303519	8.78663427831832
A0A0D9R2F6:S860	INCENP	S860	9.77219070845396	8.41259571460476	10.6557603177182	5.44821362398222	7.44887225031666	9.39745541758809	8.40020788321782	10.5792340912721	8.62792639641943	8.71194220542105	7.90922311866449	8.35766915082164	11.2325535828487	12.0477322789046	11.3317866226652	7.10952491031573	9.96733924066717	6.82727787135738	11.2477806620124	9.98882554239208	9.9105232792778	8.55107843842054	8.98626062844592	7.88823960636898	11.3069166592001	12.3397636660561	11.9482914996373	7.14575172402528	11.5310556204968	11.5632047942389	4.85623464668941	11.6198294795972	11.2190429454645	8.2582983945837	9.20574592330153	8.77584659834032	7.84474117081786	12.0614906528291	11.2433317635436	6.55863068187761	11.4333675539754	10.9442939587923	10.5894416765166	10.1745511975022	10.9145485448587	8.99773078045525	7.80931994866169
A0A0D9R2F7:S1942	HERC2	S1942	9.10724629169771	7.62304924934516	5.90842330621876	13.516532620677	11.6723198629932	12.0354624693484	12.1375416573314	11.4503439457165	11.5431231240769	11.9039761855301	12.248682856295	11.9930344713808	12.41449545537	8.09482717537948	12.2744421744024	13.1345732569878	12.3323800049583	12.637060620282	12.0448607721788	12.3594450361941	12.5119388498478	13.1762741150789	12.4028129973399	12.236528113407	11.7683577983721	8.53857853008948	12.1056988056693	13.1750233049236	11.7240415227663	11.6987910480838	12.558356235495	10.6014311094551	11.2518910453081	11.8151165494641	11.8560115867124	12.1201235172869	12.7988232965821	12.4802569499347	9.31011193927642	13.1476539318432	12.5263198015517	12.9595064387655	12.5738646313312	11.8429533321987	12.1766470526685	12.9063056129502	12.5448347134617
A0A0D9R2F7:S1948	HERC2	S1948	7.83217817609652	5.81793154155941	7.00877689741384	13.516532620677	11.6723198629932	12.5449822958887	12.1375416573314	12.1037245469133	11.5431231240769	11.9039761855301	12.248682856295	11.9930344713808	12.41449545537	8.52964846291665	12.2744421744024	13.1345732569878	12.3323800049583	12.637060620282	12.7675572114796	12.3594450361941	12.5119388498478	13.1762741150789	12.4028129973399	12.236528113407	11.7683577983721	8.08627843104057	12.1056988056693	13.1750233049236	11.7240415227663	11.6987910480838	12.558356235495	10.6014311094551	11.8054857393501	11.8151165494641	11.8560115867124	12.1201235172869	12.7988232965821	12.4802569499347	6.00662567481333	13.1476539318432	12.5263198015517	12.9595064387655	12.5738646313312	11.8429533321987	12.1766470526685	12.9063056129502	12.5448347134617
A0A0D9R2F7:T1944	HERC2	T1944	8.35449479686555	5.47672412265551	8.84558515193327	13.516532620677	11.6723198629932	12.0354624693484	12.1375416573314	11.4503439457165	11.5431231240769	11.9039761855301	12.248682856295	11.9930344713808	12.41449545537	7.14381859604226	12.2744421744024	13.1345732569878	12.3323800049583	12.637060620282	12.0448607721788	12.3594450361941	12.5119388498478	13.1762741150789	12.4028129973399	12.236528113407	11.7683577983721	8.48894163974704	12.1056988056693	13.1750233049236	11.7240415227663	11.6987910480838	12.558356235495	10.6014311094551	11.2518910453081	11.8151165494641	11.8560115867124	12.1201235172869	12.7988232965821	12.4802569499347	8.54778099814986	13.1476539318432	12.5263198015517	12.9595064387655	12.5738646313312	11.8429533321987	12.1766470526685	12.9063056129502	12.5448347134617
A0A0D9R2G9:S815	ATAD5	S815	8.95860842586556	9.14854012226495	11.8687527829482	12.0840769384869	11.2001757282007	11.7152240500666	7.11492553295898	7.81590964129925	9.21874060650029	11.2224224040835	11.5036213444792	7.91285647393576	11.3775810901589	4.15573237976338	11.1495891108384	8.52946597779437	6.30816650716427	11.0434964576336	9.82165539598714	11.8602486642531	4.75671335915388	7.5973787468174	10.7917822264211	7.08265193346575	11.1959976500596	11.6727455768781	11.8743448989663	12.303801245757	6.74711070925428	12.1470387907683	8.97871342381679	12.1842611023608	11.7613761263911	10.3781925986701	9.42189352151624	8.68218760184236	8.28727333724567	8.1395080251122	11.6394540267932	11.8580778926923	13.449939970991	8.59131239076581	9.16270348816203	4.84019440250346	12.3413784221689	11.3423802917306	11.9353455132499
A0A0D9R2J6:S4178	AHNAK	S4178	15.427808282722	15.5341215007736	14.9573007447799	14.9079627167921	14.4509220642392	14.7590667843627	15.1771235154477	14.9638694669423	15.1205972125066	14.8350524521126	14.2210778885267	14.3667896081303	15.8930376586005	15.4588170083018	15.8927634119156	15.3513791933004	14.9760670323347	15.452552669577	15.058502698124	14.7436026930888	15.2677489364026	14.9064532804518	14.3700384153385	14.7146721725711	15.4874078601897	14.8379691606852	14.9779048038064	14.9545441775069	14.2329701439404	14.6349641812122	15.5202302695022	13.9398325690259	14.7020543185409	13.3892355750807	14.0239299165657	14.3795682376287	15.4369999116945	15.2841571623138	15.8715667898002	15.1398041561632	14.8841763229743	15.0151022737649	15.176984193235	14.8483550580564	15.3483234373052	14.369057191119	14.3086444919273
A0A0D9R2J6:S4196	AHNAK	S4196	12.1370669111898	11.2312171769222	11.4761512769859	12.2747433683227	12.1431243863013	11.4364664874951	12.6778521456363	10.8338203551914	9.36869707813371	12.2023912110502	12.6827743703907	12.412681426389	11.097853604104	10.9118296556332	11.3648777734912	12.6275380329404	11.8707585702293	10.8041922260325	11.3664194041491	11.4491146510216	10.2468896872599	12.2539996629268	12.1534851523194	11.4604503924232	11.8231278734488	11.1462800621675	10.871441463053	11.9931171595353	12.2477851867478	12.0162214659056	11.63675073619	10.7459757436774	11.2032655418169	11.8125367651118	12.2095452441653	11.3334478479678	12.2253398997926	11.0391868076716	11.2170437318184	12.3967571972532	11.453821243813	11.5951269049935	11.8121068119704	10.3117085307581	10.7137239514078	12.1451831983171	11.6536094357491
A0A0D9R2J6:S4199	AHNAK	S4199	14.4424151578731	15.892355184629	14.9844808833157	15.4075417145896	15.4230086488695	15.7199254679235	15.9047958431179	15.7105427797446	15.2994062505571	15.1153055575169	15.2924446577074	15.4653363513394	15.2592969504166	15.1422634733133	15.6055428610929	15.9184460148672	15.9105815836315	14.8150833700088	14.5312384934184	15.5194453855326	15.3994405923317	14.1535184107642	14.7944809243585	14.6131993424311	16.141936905708	15.8100678705049	15.6527212124065	15.4493784371515	15.9211231759052	15.8496589909617	15.2703729516922	16.5376928610921	16.0884136025674	15.5679371889267	15.2755230677084	14.9124369593004	16.02169050531	15.8509792867607	15.5791112706008	15.4670118591774	15.4070710813233	15.5710905438967	16.0880366440651	16.1460842487825	15.6560501835288	15.646815643418	15.3539342711295
A0A0D9R2J6:S4210	AHNAK	S4210	14.20349186731	16.1634131020406	15.8786120072387	15.8427333023193	15.993025607124	15.9471967244556	16.0336752446617	13.5514965736632	6.06064855923944	15.7189674280507	15.4480149284425	15.3219902437781	14.0161688762904	12.7558933586108	16.0696901683705	16.1292678567792	16.5639417756525	13.6181729256251	15.3510598202623	12.109322570524	15.8726300264003	14.6201556668413	15.8365694981504	15.0403906581573	16.5540026072562	16.7714645958723	14.5656201606638	15.9181779966855	14.3378066312631	14.4346163779033	15.2600246001419	16.6157621399822	14.1234170853362	15.980840216634	9.33042878610566	15.4818936356019	16.5001225260842	16.7106652501342	14.8835925732413	14.5341238704055	16.1707471047584	15.991238722597	14.803711495033	14.0843812161334	15.9486055871298	16.0962963128088	14.0685031359943
A0A0D9R2J6:S4277	AHNAK	S4277	7.19199298005566	9.56286222564106	10.8308014771139	10.288165705831	12.0395306696605	12.6378147195306	9.4856604256903	13.3273181477542	13.0991806604622	8.24190528728979	9.64189507728994	9.06218056676499	10.9618658351027	12.2767921497443	10.8239987312699	10.0410148735426	11.622058868002	11.4434174330996	9.24682644558246	9.79677738355403	9.06456112727719	10.4012076618346	11.4316202325573	11.3977915459966	8.10170335554099	10.3458894654154	11.6341245917811	9.0594661670242	11.6453993247604	10.8792217678792	10.4308108166157	12.5659346516622	12.0936241511107	10.61548922373	11.2321748221146	11.5557400519825	9.77409781449911	11.8987654659791	11.3705596870391	9.62123922764941	7.0949566376388	10.5921125382934	11.159856541535	10.1969909263491	12.607118495355	10.4117982264198	11.3544217404895
A0A0D9R2J6:T2163	AHNAK	T2163	10.7057285491376	11.6659355889796	11.5783273676324	11.4111157729044	14.3225134650488	13.2606253082712	9.81150329138437	12.5031767445273	11.9091104017788	13.5843132543845	14.5324510675459	14.5169332086913	11.6467796912636	12.3065031443714	12.262133351318	11.6118987121962	13.6737757120978	13.0687562445866	11.5635211741582	11.2727012485248	11.3561384181363	12.219186392742	13.8599164407061	13.5795224029873	12.4194661747132	12.5011297331765	12.6830880685396	12.0959990941672	13.1633807708695	12.7736145390293	11.573763960515	13.1858969870094	12.5032280810037	13.056843280809	13.9548767639457	13.6919748651331	10.5252515233688	12.5997468920894	12.280384089424	9.70169660019388	12.3383687871394	10.6433157028444	11.9086354924059	12.5303824514296	11.7555407750007	12.2406420094965	12.8984586714518
A0A0D9R2J6:T2877	AHNAK	T2877	4.61758132657338	4.84605905690118	4.74342040585431	5.33551587229475	9.81197683009637	7.64360630377476	9.42163228921773	7.14485856872777	8.93972328381366	9.62595177384953	10.6705361883396	10.2142222258072	5.78772524765565	8.76945447941919	8.46331103462488	6.22098370406614	9.02234995007569	8.65263672699406	7.69962180334501	6.70892294579707	5.54614410658991	7.31002448296979	8.45429966167726	9.81900089609903	5.60993259694706	8.9711092587271	9.03553197490273	6.25558612566396	9.36403498770169	7.554673944839	8.04983699683462	6.90381446761679	8.93473363690082	8.60357437592591	8.68791409107325	7.61587384728845	7.97693678832986	8.20020402664359	8.4900089222188	9.12074694127166	8.12700734019526	8.1402287449374	8.79881243683333	5.83291582645239	8.35128657172411	9.05489108054552	9.10726225082366
A0A0D9R2K3:S151	FUNDC2	S151	14.5188157228468	15.3747380840338	14.7711555898138	11.886214501608	11.7071315091794	11.4474586168068	13.8496430311434	14.1747975718457	13.9826706264494	14.255757581577	13.6382478318659	13.9233876817449	10.9867699083576	10.5056689587155	7.14047006281405	11.6055237354403	11.1355990435661	11.2127099943495	14.0497680952434	14.9643255279961	15.0329792147387	13.5366018182512	12.1340721972932	12.316332084164	11.2067774130299	10.4246688189268	10.4128231657	12.1511919525044	11.4210925201425	12.2063444148495	14.280133684083	14.2342798924357	14.4436473679977	12.7838003501099	10.9871095256072	11.8652775651056	8.10074839660497	11.1329642397303	11.0808311274563	12.1850050785649	13.127125101786	12.8662171035665	14.4357107463672	14.603992093594	14.592603962992	13.6440731903989	13.2730151108939
A0A0D9R2K8:S357	PHLDB2	S357	7.67551820327891	8.98050002594986	6.97465494773627	9.18011426395744	9.25872582597608	9.22654361022986	9.58377699022653	9.5984708630995	5.48939207276864	8.47818788314681	8.05224015948208	3.11428896698765	10.8609685759256	10.1839993288151	6.09465561832463	11.0858110640007	9.54592856623953	8.47466905671387	10.5348909028976	8.58841278233733	7.25854765643416	7.80504152500915	7.76195052324988	8.65331889155763	10.5657315208484	7.68196436646961	9.83621030101173	10.7825068297537	9.17873995292822	10.3231464762899	5.61860216087398	7.7479950480456	3.24372779336659	9.76326528754507	8.94884638179312	8.88804544815426	4.13931882566478	10.3938772318549	9.00994064157243	11.5791526238886	8.97418874404271	5.71965545738966	10.4698411327401	9.11156424209234	4.52730023740395	10.7216433716564	7.552854545784
A0A0D9R2K8:S361	PHLDB2	S361	14.0479777664576	14.7699942308281	15.1007063198143	14.2636159887492	15.8180481498355	15.1571279341727	13.2523421230106	16.062530401448	15.3722296697733	14.9929861272394	15.2095461066174	15.0359571662302	15.310705255797	15.7815499710558	15.2671502859278	15.3155125637394	15.976348166475	15.2637889427205	15.6453821170685	15.6126685691807	15.3980118353439	13.7801230803164	15.4588505016689	14.8970134125957	15.7267322419124	16.3518971149435	15.9711762532233	15.0013001209654	15.9426402357946	15.6667768124891	14.7768912769878	15.9688610352548	15.5744790019794	15.6897317135976	15.7942636524932	15.776928701053	15.1637632676067	15.8229471723006	15.5057012705435	14.8833695580009	14.7275655215266	14.6823853907195	15.1160117641178	15.2630687119029	14.8279075962438	15.0772836519231	15.3233684552666
A0A0D9R2K8:S495	PHLDB2	S495	3.84920292335467	10.4536892813326	8.29332192107528	10.7981463827274	11.4055852680918	11.2048784616128	9.44794988801555	10.9479320009397	6.6515641270369	10.5303240413388	6.65062620180141	8.87211859164659	10.6479980738003	11.1859560750059	5.55816064737375	10.8633729880692	11.4006359372661	11.9362709847226	7.95633648692073	8.21258458856827	8.64695735430544	6.78997349637653	11.1412290208348	5.8965535578967	8.07342058659759	11.1835995522749	10.9950517556718	11.0105319076806	8.79073213771526	8.88161956229193	7.51619054372848	8.52919309735114	5.0362890745401	5.56098402481502	11.4618535702	7.51803931908916	10.8828573594706	11.3000876112837	8.76326924694854	6.80682033939094	9.17389118173611	10.6979430591551	7.05742094123693	10.3628979191394	8.55371740374084	8.10644533928187	11.2027775580472
A0A0D9R2K8:S516	PHLDB2	S516	7.13787289186146	12.2071451172583	7.6552144812478	6.90717375484845	12.7560990579388	11.922501036392	8.31501393264016	11.9094360707615	10.9070273028326	10.5272241972041	11.1089066855918	10.8389300637332	8.77603068380018	11.4153703746277	10.2917556121228	10.9132083417292	12.1214433011899	11.6737076164542	10.594985618379	11.3978192373088	7.33039857535519	8.62390335978516	11.3379293258455	10.5770337963094	8.72102865721032	11.6822790265404	11.5564284137647	10.6663905680902	12.7831891484504	11.8455150284835	8.97507831430415	12.9093907116776	12.8647333831709	11.2503170372551	12.0336519589581	10.6820674294673	10.5081030994889	11.6872857212283	11.3377379414794	10.1138939421569	11.2420967530422	8.32009614005486	7.6140296716754	12.3702914851974	11.7587906404891	10.8773735304118	11.1770980626173
A0A0D9R2N1:S488	HDAC7	S488	8.94961850058409	7.54147785042692	11.7245438718929	11.3053034337726	11.934447440256	5.75431480519261	9.24412850811689	12.8032720819894	8.21182024946258	8.22239399514223	12.0505823026412	8.78519066216247	5.25724737286955	8.32654512706459	9.11890178155497	6.11617928865273	12.0365366001473	6.70384809769149	12.6032660280565	12.7397879846011	7.6108524625434	12.1728891221872	12.9981951143153	12.4095689172887	9.06864530131162	11.8541397084975	6.65340120381322	8.77478233772154	7.9074267457546	9.33139159341304	7.61590411595708	6.66266884721524	12.4734242437499	5.59849738474632	9.25182219598588	12.5137401427189	10.7263075804562	9.29509149312404	11.7486951626254	8.32751832116936	9.36419474203327	11.6571659077663	12.595303123948	12.4829593627909	12.2670829004693	8.74556157829551	12.9462406747925
A0A0D9R2N5:S546	SUZ12	S546	10.4625848879777	9.87577270024413	10.6886262156968	11.6320946376468	11.3810580557799	11.0062496691604	11.0919922081216	11.0333849956606	10.7484804853112	11.0145901363847	11.1320083329156	10.8640105373743	11.2177964006717	11.6616993636632	11.5173445417413	11.4078136389532	11.5072616770396	11.0785861857329	10.8901708636805	11.5757932015111	10.1988551401814	10.9313242939983	11.4354130308586	11.2286009346144	11.3317756822427	10.1414719280922	11.2691260131191	11.293040942352	11.3629076601314	11.4409249705958	10.8942871981852	10.3574568306077	10.9081911252694	11.18748051485	11.1815074329316	10.912534229353	11.5900520610433	11.5586600360744	11.0030027031027	12.2915476580045	12.7251285562304	12.6285008480674	11.3729577774514	10.3826880445072	10.7304477620377	12.0176153025359	12.2459486612508
A0A0D9R2P0:S152	PRKAG2	S152	9.00092379107039	7.38216871297361	6.5931561303405	12.1198503267375	12.1031427562407	12.1883722361271	11.917374108136	12.2720615196528	11.9017712743966	11.3800899612925	12.1015013840613	11.5875397325788	12.4177352661752	11.8833393943258	12.3401701431875	12.5518551729702	12.2036035427149	12.6469902330201	12.9443932568488	6.94463446072539	9.23270148934468	12.284352415642	12.3928590035755	11.7349342071772	12.4976762544542	7.47351015398186	12.2651452425741	12.6823313031051	12.3471264769502	12.4608136524749	8.12775304381121	11.8775551754263	8.63392136667105	12.1948051935723	12.3027160509385	12.3884982788833	12.2400460593124	12.3326988267948	12.7834904852773	4.48364131138033	9.04480837783936	11.7356691260956	12.6485550302432	11.984684074576	7.83113254948906	12.8819083359514	12.8405022813751
A0A0D9R2P3:S755	ERCC6L2	S755	9.35249557036662	9.10780766494789	9.75851858424842	10.0109447284197	9.6105658103268	9.58581952607879	9.45991362678157	8.82914220354226	8.79611491531373	9.69403416768383	9.01068817152128	9.26539631925388	9.64559641935904	8.7286885742424	8.19572224589637	10.6507364021003	9.72992229350174	9.10330888804096	9.05431433994731	9.59547552847632	1.58077788983906	9.32976684889732	8.84857778643753	9.63021234842227	10.2884977598008	9.74221961293677	10.2938490790489	10.6280670392814	9.70314109043145	9.78816252319482	3.51727090862655	8.65155795766895	9.35106696689658	9.43976064679552	9.73394738139524	10.0641456892773	9.89944522433486	10.2798352186183	8.7243176115073	11.0884475919896	9.79735445493508	10.636901644452	9.27176809166097	10.0838850371882	8.07046110835291	10.6135450824239	10.2775165028904
A0A0D9R2P3:S758	ERCC6L2	S758	9.35249557036662	5.008619690006	9.75851858424842	10.0109447284197	9.6105658103268	9.58581952607879	9.45991362678157	8.82914220354226	8.79611491531373	9.69403416768383	9.01068817152128	9.26539631925388	9.64559641935904	7.49991440660585	8.19572224589637	10.6507364021003	9.72992229350174	9.10330888804096	9.05431433994731	9.59547552847632	7.26143708824553	9.32976684889732	8.84857778643753	9.63021234842227	10.2884977598008	9.74221961293677	10.2938490790489	10.6280670392814	9.70314109043145	9.78816252319482	3.69542907262956	8.65155795766895	9.35106696689658	9.43976064679552	9.73394738139524	10.0641456892773	9.89944522433486	10.2798352186183	8.7243176115073	11.0884475919896	9.79735445493508	10.636901644452	9.27176809166097	10.0838850371882	8.07046110835291	10.6135450824239	10.2775165028904
A0A0D9R2P8:S31	COPRS	S31	10.6456988744532	11.4816283830468	6.66764520858227	8.97142202125032	12.8305667446948	12.6182525549968	2.93247673897713	12.8110292825335	11.3422964179825	10.7516277055663	10.9715411437757	11.113842773693	8.94990971079918	12.7991373635637	12.011963575109	11.5743346956962	12.6955471112669	11.9746994365241	12.5884724462029	12.2355919924051	11.5425803028841	11.4502482580444	12.2442449904154	8.04626631325037	12.3245506498292	12.2744665184816	12.664063434013	12.8280945167955	13.1021129000901	13.0041709586349	12.0521029193894	12.5825773052351	11.5331678178573	8.80257944553784	12.348030576961	12.1250117392949	11.7616311945221	12.7743186163011	12.123230869752	11.9331598839155	12.1674646756348	12.0593250183428	13.0595470055569	11.8846558403586	4.59522912220848	11.2096095078858	11.9569426518552
A0A0D9R2P8:S66	COPRS	S66	10.3084181932126	5.96859223318544	10.5787532481534	10.8317543782176	8.77605039668223	10.0985467107061	10.7958857651714	9.34185809824601	10.8161700938739	10.0781130655244	9.67817393119026	9.38371959084815	11.1224846292892	10.7113631216874	11.4149061169	10.6591822588307	10.8237988120511	11.2216246892889	10.3657868081753	10.8253001282524	10.7144465596789	10.4059968976131	9.82971695971065	9.61502548545231	10.6105286974619	10.2283604737589	10.307134377873	10.9100859567715	10.9373361756052	10.848079464063	11.1961615024551	6.92604647032495	10.0970485915976	10.6164996178097	10.1888369217748	10.4566637921596	10.7467181834387	10.5907864958836	10.9957435069671	11.1713834812943	10.9873701181902	11.2289742979232	10.4625286369401	9.90295341591381	10.2688931228897	10.6628344175227	10.5419636698421
A0A0D9R2R0:S176	EML3	S176	11.8151918231184	11.3238300231443	12.2539739760739	8.83946849112243	12.0615208326258	12.0849751705249	10.5557394110764	11.4340449138396	11.2584893339087	11.1352740230349	11.6695545545463	11.33031441115	8.38373160907014	9.69999844305754	6.96915227497999	9.87969876172739	12.1104344030356	11.4620796308771	11.9674157014348	8.32342647062993	11.0902314171944	11.9151325445554	12.1040213330258	11.7885999806685	8.19109993535795	8.28140319638065	8.24559579923059	7.98248075717697	11.446855508046	10.7282519720948	11.6458830168179	12.145448100607	12.310918742073	11.0515216088274	11.5252818234983	11.692253849992	9.5254792654629	6.20807316872643	9.74975631338448	10.621831914056	11.2338009875314	11.1792463570945	9.37696235062056	11.1496212367789	6.74340056672391	11.1469900376495	11.398203018356
A0A0D9R2T6:S2		S2	11.824016464483	10.3578541688876	10.9174252349358	10.7810305227018	10.4565966685316	10.6203799949362	11.3218479446997	10.5633563838325	10.1260520635491	6.63441293498285	9.54456146721844	10.029875033874	11.1757115342815	10.6141650484053	10.4346816429888	9.60010836697346	10.9945266363379	10.6383004388705	11.3786702307042	10.3235462528835	10.7817814920857	10.7096429094073	10.5246789032981	9.65818649985403	6.27905034365906	8.81009151187505	10.3538589944517	9.66879156068086	10.224809722628	10.5111723729758	9.22138369325818	8.50402928908723	10.2467756640063	9.48782304073597	10.5174471936334	10.5601873432205	11.0233582960764	10.151633590561	10.9461183359732	10.0088256176789	10.8790446209808	10.2295848747591	10.4832756430945	10.5919336771327	10.4547777803005	10.7695153732995	10.3028928387023
A0A0D9R2U5:S2525	NF1	S2525	8.52463405036615	14.3313725557766	14.2335860636974	13.816115345756	14.5337955175088	14.8354749096577	12.1691521980537	14.6746917900117	14.0738757962791	8.65966368540351	14.5287870522494	14.5653765532447	14.1220457273641	14.2985962906286	14.1644732502508	14.2611687306191	15.2650994858853	14.5136011604692	13.5170204409624	14.8434979861847	14.6465315218222	13.4777893064284	14.7080308042335	14.1686203581937	14.4516187627777	15.3103782118433	14.5832234006669	14.1332162853164	15.3099784039835	15.5057256121952	13.4884996653106	15.520669320906	14.4799581161248	14.9625289885999	14.9818536127007	15.356571983034	14.459466894802	15.0451307733315	7.96325672936203	14.0665297840484	14.4951807231312	14.2577179152914	13.7675188300897	14.6777614582725	6.78063589893274	14.3023026640664	14.6996660361269
A0A0D9R2U5:S2553	NF1	S2553	12.3184616284159	13.4307176051653	12.8693555872312	8.65018550875632	11.4892510654753	11.1887670887156	11.8840341891632	12.3919066990299	12.8805542770755	12.4249103052655	12.3958332090782	12.3977021276204	10.5354512007811	11.1167051285609	11.1320196570124	10.4886381974255	11.5271788421018	10.9072294849822	13.4227680637159	12.538362010269	12.9734193152094	12.2879708443626	13.003284074975	12.7433943797143	10.8749210064403	10.841596869992	10.8442467146868	9.97286251254414	11.895570639023	11.7536023525997	13.1686337538837	13.4554582598422	12.8527111035638	12.2761991094512	11.5201083039712	11.9461886572749	10.382019257864	11.1568332809009	10.50146780541	10.3310266832268	11.8080708596297	11.2784760736423	13.3949467784285	12.8582076983067	12.8167954807132	12.7054652526628	13.0030168609608
A0A0D9R2V4:S333	NCL	S333	9.12942057133451	10.8045000637024	9.23057658336903	4.03239345794827	10.7994279316786	10.7930586509296	8.72712969707346	8.05075947386106	6.76121697591267	11.6489926895342	10.4605206895754	10.728251506058	9.99158772144838	10.5515084299244	10.8948282087686	7.51171512140212	9.07943583011453	10.432455418228	10.7584165001892	8.51420564093054	10.1943884353795	11.468796060957	11.0576914004447	10.9047294248478	9.42245166811807	5.16153365645702	10.7154742345241	7.25146802967702	11.315397302913	11.1239573598472	8.75421762456959	10.5325480827247	6.28650072595438	10.3101189870756	10.4615234304445	8.91372415938771	8.59447897610253	9.37732770734418	10.2238690174675	5.96026045120697	10.9474987470253	10.5843463567839	9.47453512943802	10.565710704035	9.70616538551639	7.21696839493284	10.5184610085597
A0A0D9R300:S161	HNRNPUL2	S161	13.9522255406129	13.5253831906224	13.3241546253953	14.4452224361111	13.0406010577329	13.2268143838515	14.2960754994892	12.1599452723984	12.8747216489649	13.799261432009	13.3199656832818	13.3066128171001	13.7267019168717	13.4174989549824	13.5077016101731	14.1210669867611	13.5503758726796	13.8362516151304	12.4303526012243	12.5811943971234	12.4568455885712	14.716475985614	12.7704737263861	13.3198249355815	12.9002541868195	11.5866616562559	12.1688886302339	13.9384574757739	13.3319000619048	13.5588280665454	13.1074590898549	10.8941208266702	11.8455310880713	12.2409469692934	12.7343971208895	12.8345184718763	13.1948005702827	12.6825302613242	13.010607450618	13.9490131026911	13.5304688147696	13.7406549268294	12.2344524338361	12.1333403243162	7.29883918900665	13.894853379699	13.9517369553684
A0A0D9R300:T165	HNRNPUL2	T165	8.20282371674318	11.5995772066893	11.7834581213462	11.0155494372853	10.6321564146083	8.9923403150998	12.2033827785973	10.9647669500491	7.78078348687583	12.0909593046823	11.7654786106133	11.8234561037099	11.2604586259455	11.1356413862893	11.3744761990283	11.0212381832826	8.23359628903833	11.4505205307353	8.44623284941698	11.1205917106612	8.93181733959406	12.4180730189037	11.5376680192692	11.58643939258	9.25880669613834	9.02788331642991	9.70756608710941	11.5744146495087	6.84812486457542	8.74784648021313	11.4067471106257	8.03725311584537	9.49170900967428	7.9293085569369	10.8137973102755	10.7998192947557	5.55507723141465	9.34598959682481	11.0179763414878	11.2949099659825	11.2932317009826	11.1747843633744	8.74573150523567	6.53855187738365	8.29588333359492	11.3149329375536	11.3374044886167
A0A0D9R303:S485	DKC1	S485	14.0849971835793	12.0423246390796	4.98300365408371	12.8116703412315	11.6471683029437	12.1854822068426	4.57472055619848	8.57212075121662	12.9641312817261	12.3632244236095	10.8630709758818	12.4780751236918	13.2021023403878	12.2623225261208	13.3287475126732	13.8990955912699	11.8543517280279	12.9814988809311	12.1598857515463	12.0085173605602	12.2034189068629	13.5235127232763	8.99653502688799	13.0440112177717	13.2260346890256	8.55579850420232	12.361636610433	11.9691737777805	11.4808453563191	11.9594144562831	7.05624566381787	11.2320253767996	12.1662238987024	10.8434508417143	12.7204939185122	11.6511996318204	12.5282286235138	13.2978418832053	13.0268041541717	13.1979588102271	12.0108687257043	12.2339068728216	13.2784605553278	12.5067221942791	10.5542643074057	13.3164474820575	12.8620917958046
A0A0D9R303:S494	DKC1	S494	16.0515594092841	15.7363738632789	15.5170443985271	16.1342870838152	14.7256960434684	7.27238283333024	15.9842944690515	14.7621903501188	15.6250405866681	15.4406678983949	7.2399833002281	11.0221721229912	15.9409437139112	15.0883992365236	15.763087136047	16.2783146357483	6.88741546395799	16.0389408827105	14.8673657380454	8.03226646573578	14.975679173825	15.8910787269218	14.8889309296881	15.1230733525813	15.6053875838246	12.434141569216	14.7979237178945	16.1226051979979	15.1077024975719	15.3166244693758	15.7891228424936	10.3002770768255	6.2048355798354	14.5555779148387	11.7761223247751	15.2903447612312	16.0259579284395	15.0547376669208	16.0517202850881	15.9409030809252	15.3884081162093	15.6178650088361	15.564522366052	15.2495762765988	10.5542643074057	15.7740848720511	12.9067309755855
A0A0D9R312:S409	TMEM184B	S409	10.4905768703302	11.1783933200525	4.16919922615121	10.4149054488605	10.4187834737203	9.99642357479896	9.53594302213526	10.7113663301933	10.8131018115316	10.483868892712	8.72164309248987	11.0567935986793	7.74986279544517	10.2840302028127	10.2469934770466	8.86592526595383	9.92288344969892	10.6559417703997	10.7362859409637	10.8073231668947	7.61800919892026	10.5916386257435	10.3795079091437	9.80735279583743	10.5057704300419	10.6027402673563	7.40621246991134	8.75656472941737	10.4383232205597	10.1244151891653	10.7188610378455	10.4008450641815	8.86599801916706	8.13122635613306	5.58469739853105	8.33806574535782	8.48519458928276	9.77011234581908	7.82000127716072	7.36308782170165	10.5182363546487	8.2825605420989	10.8496227135856	5.57564401939969	11.4541624323018	10.1938178437781	9.11316381949832
A0A0D9R312:S410	TMEM184B	S410	10.4905768703302	11.1783933200525	8.69887993358204	10.4149054488605	10.4187834737203	9.99642357479896	9.53594302213526	10.7113663301933	10.8131018115316	10.483868892712	9.40078578231462	11.0567935986793	7.24806743335495	10.2840302028127	10.2469934770466	8.84708703773124	9.92288344969892	10.6559417703997	10.7362859409637	10.8073231668947	7.58131004040476	10.5916386257435	10.3795079091437	9.80735279583743	10.5057704300419	10.6027402673563	8.98876316628683	8.75656472941737	10.4383232205597	10.1244151891653	10.7188610378455	10.4008450641815	6.34450924948381	7.03619892169955	7.64806259783089	8.59299087441914	8.48519458928276	9.77011234581908	9.05099106392795	4.69754378224786	10.5182363546487	8.6701877387837	10.8496227135856	7.12006086182467	11.4541624323018	10.1938178437781	9.11316381949832
A0A0D9R315:S1014	KIF20B	S1014	4.27409689690662	9.45148248834166	8.70956693568222	8.95347285824424	8.49429323817196	9.5707998947249	9.96590554417109	9.94035352185879	9.35240879258203	9.15450105448324	8.84720259717733	8.75617444047371	6.09007832854742	9.31841254750205	7.2122269363938	8.02574939228715	8.92948936973405	9.50767900655389	9.52815972825581	10.7439928216115	9.92840412583067	11.013096258627	8.84614934061313	8.92589131001672	8.88179440695342	9.40005615472747	9.08529758697675	10.1533994792223	7.87271182292968	9.65034032941133	10.2341706087963	8.96466226519185	9.78896721851319	9.10725332947167	8.33973050494494	9.38012674927857	9.64212284503393	3.27683613009591	7.3657108918993	4.84572276849012	5.79364891020466	6.1786618119958	7.03854545283167	9.19023554097069	4.5464452286596	10.1635402418944	9.20523574955254
A0A0D9R315:S1017	KIF20B	S1017	8.58319281266998	10.9344718468764	7.72681147534349	6.20787949272602	8.23363966678448	9.5707998947249	9.96590554417109	9.94035352185879	9.35240879258203	9.15450105448324	8.84720259717733	9.02323190483104	6.37684810781511	9.31841254750205	8.61821907831476	6.45038154956057	8.92948936973405	10.8112993276799	9.52815972825581	10.7439928216115	9.92840412583067	11.013096258627	8.84614934061313	10.3167472657706	9.30836866747701	8.47667251105134	9.08529758697675	10.1533994792223	7.41619402862729	9.65034032941133	10.2341706087963	8.96466226519185	9.78896721851319	10.1623217852534	8.58807931178176	9.38012674927857	9.64212284503393	9.64988550500201	10.7775560867908	9.27217835404144	9.06708158719091	6.73774001220985	5.34424365234961	9.19023554097069	9.10448904050605	10.1635402418944	6.86871390523719
A0A0D9R329:S52	SLC38A1	S52	13.7279054777528	13.7332802203538	13.7783496311863	13.1855399013162	12.59913998744	12.1630704740093	14.1106031007468	13.262243690555	13.7825839542832	12.7967417720936	12.6075403965726	12.7379585154634	13.1738722378074	12.8226726075608	12.9392233557143	12.5939041330967	11.9015588924074	12.148647031273	13.5242884794496	13.9306118733056	13.7514255941774	13.0119021628094	12.9715587891956	12.3781777335495	12.9208037974336	12.2371819010243	12.7143997956779	12.936474813787	12.8982664978128	13.2536444464422	13.704547079482	13.5547829001149	13.6566499471499	12.1195408073392	12.4634473705241	12.3006120704832	12.0815139669519	12.5070400938613	13.105595570855	13.2379835301976	13.0829067148655	13.1620701616254	13.6566342512723	13.5857879479155	14.2834823619551	13.4060428813282	13.659622127592
A0A0D9R329:S56	SLC38A1	S56	12.6603881729902	12.0330774796878	11.5831494471194	11.9165457169455	10.6243989633341	7.76032209948205	12.7515965758497	10.8476647562847	11.5849596428177	10.9545106664541	10.4832960914038	10.8815248805092	10.9903880617537	10.8889492849211	10.5942823111902	10.9108208730742	7.49699589080239	6.42779695511186	11.8801895872755	11.4457662203765	11.7984518637443	11.3912184551957	11.3245757646174	10.2990053269571	10.6741124160088	9.77300161771909	10.4435148668782	10.9327891535219	8.18202368700557	10.5547667484575	12.0310122797269	11.3261672807576	11.2729664362392	7.94461533810805	10.0344143623176	9.0754028344466	6.37721702585707	10.3989285490747	10.7050944843594	11.4485990603324	10.649991364971	10.9390325488793	11.7257569561781	10.9967626396038	12.1295892634909	11.6039904899218	11.7092628388751
A0A0D9R337:S567	SCAF11	S567	7.34583217709194	3.85973447059657	6.07769489231865	7.090247419632	7.33656082325268	9.40242243519414	5.3541999640369	6.69749557305799	8.40259880831404	8.86027535524494	6.94848111266431	9.20031448280912	7.24847271526994	9.32873684334957	11.5851390154335	6.94985029597402	13.0463077345718	8.51867112043842	5.1673961361418	5.74113144263327	11.6599047149175	7.57312478614147	13.082307967657	7.56456784460415	7.96458072399817	9.46903344582114	9.10261456799784	6.7140410576906	14.3483524713015	13.5240771471794	5.73653824328918	5.3948308997749	14.1360932934808	7.73337245443016	13.3353507444941	4.4406305974332	5.62352161180945	7.11872878296875	6.10456907984172	7.90966456193409	9.16995956941272	6.05637588020099	8.37899524609433	13.4861356115313	4.55914559463065	12.1497636790262	9.42055797311007
A0A0D9R337:S609	SCAF11	S609	13.1634965492791	13.9575301108477	13.8269020562209	12.7563885398412	13.9130109416054	13.8159727492172	11.998686553893	13.1137176006619	12.881568075002	13.6953972089368	13.5836928432913	13.6089510911349	12.9033301457582	13.4139737902219	13.6014806791337	13.2330948372826	13.7474306072139	13.9002707031475	12.6581781742322	13.1434270685411	12.8602097642193	13.2348563410648	13.3675042044605	13.4548620843946	12.760247745723	13.2143289442043	12.9563742052764	12.6055877819642	13.672272012036	14.1052720291723	13.0164010002288	13.151658833831	13.1889682339968	12.4404204017561	13.2971176027004	13.4180372647622	12.292992331093	13.2951485789339	13.3187779227529	12.3876087284788	13.4245411019527	13.2689860205248	12.1018505395456	13.0065118631935	2.40364759636259	12.7453502525817	13.0777821839785
A0A0D9R337:S797	SCAF11	S797	4.66336005900196	5.23217408695776	7.48892559835977	7.35433973513929	9.49695116903193	9.32969365152646	6.85280989198358	9.22930210939664	9.31648715716021	9.23773837197662	8.51750414073807	8.4888394390641	8.48864883893306	9.07687761494898	9.32310132164413	9.17720045672769	9.19172291808537	10.0404085999944	9.3798057425219	8.32972357600242	6.93229588822925	8.51967090883651	10.135903851865	9.78550822264354	8.15745554962584	8.5814809271409	8.02583172184518	9.58716276940872	9.19546412450302	8.92676633277394	8.08540655244462	6.00912667657379	8.46976221965292	8.58636811468596	9.99452709671291	7.41115297518516	8.71950113896494	9.17731694571898	8.39197782273108	9.28055860425569	8.28292127406599	9.01676719955498	8.02984938598439	7.65104473185001	6.99640370557239	9.30213335938851	9.30639268767719
A0A0D9R345:S658	PALB2	S658	6.4071808006803	11.0093989437458	11.2361000917487	9.98156920619548	11.5286101779849	11.1335315434928	8.03518129955796	11.9385305698048	11.4878165891263	10.2987678320878	11.1375893090463	10.9709812735673	10.6313951754522	11.0162808807769	11.671732062806	10.8933092279724	11.3940916558035	10.8968945785993	10.2044132614248	11.9366620027757	11.559155171667	4.37415749546395	10.6376105030038	10.7242261579666	11.264337806001	11.0898853216735	11.0781244948582	10.5693984914748	12.0135422652992	11.4718305659931	8.02665857295583	11.9783638367381	11.5209473854463	8.16318345209148	11.2202275379966	10.9586470345194	10.6493922598189	11.2321673527977	10.9878177179385	8.07192408838616	11.0987474484696	10.5494131771679	10.1080972281128	12.0128026094447	8.75414844198312	10.6473697256009	10.5112670296954
A0A0D9R350:S968	TJP1	S968	7.17660711331285	5.40415564843194	8.5565076236401	7.21199849310137	9.58885394030581	9.4578450019524	7.80586594175608	8.56067237520467	7.52946327771254	9.00224010772327	8.10355034761256	9.12613876438884	9.5894443776836	9.8994276690075	10.0486328053431	7.96350963818194	9.27835421855422	8.00191280360629	9.24861245737473	9.24602241219323	5.02400947105755	4.87741701840255	8.86630557193319	9.36474051517528	9.01837561123838	10.9418893979228	9.02552539411811	6.05407003425442	8.60713104557776	5.2000337235313	8.7119009400714	10.0735902510289	9.51750650187521	9.22477139981181	9.29821393843834	8.41701966938298	6.5662049373421	10.851331945589	9.63850601287218	8.36984275186401	9.43402882804612	6.95286133711558	9.72543479369553	8.71028338728739	7.14415015009021	8.23059874985857	8.97445751658904
A0A0D9R370:S1084	FLNA	S1084	6.54012287502862	14.6337958639236	14.888449377655	13.3276763308226	14.7605601909531	14.7588114407334	13.2607603042427	15.1110634811278	14.9970399066317	12.5278918298872	7.67075004444369	12.4540545883773	15.0903861411037	15.3458015472397	15.3429485507562	14.3063338033236	14.6851955290989	14.7558760823241	15.5279364826365	14.7447515184955	14.9246929221931	6.09220299500053	9.32591478656538	12.7504252491654	15.1859756272257	15.6415153778576	15.6176429593953	13.9200717404637	14.7229609284363	14.7659892965097	15.022044756939	15.0435699158995	15.0673145032045	8.87278290790143	13.2868986469952	7.38350492732562	14.7655033799805	15.5298130579171	15.6460261399704	13.9965362828755	14.5010912258681	14.0938481003976	15.160119535804	15.0325684166822	14.5422075418342	13.3298887822318	9.05540462891199
A0A0D9R370:S1459	FLNA	S1459	8.15666685111099	5.76103450008243	10.2331667469668	11.3409683545096	12.7393032143654	12.3768549871673	11.0562161606592	12.404919241535	12.5159769105886	12.5197088680629	12.6425336848181	12.5041387440967	12.1206302998578	12.3716934029113	12.5603735181841	11.0035323482985	12.013742635347	11.8971846468173	11.9138355220201	11.7288238558757	10.9493953307604	10.8277916366078	11.9319156051548	11.6905895650748	11.5102824773168	12.2603381649131	12.2043367934415	10.2945656415932	11.5786840568841	11.8275031418637	7.32585728872559	11.586765667539	11.2665580446469	11.0595780939106	11.6500731548595	11.4798348478964	8.64486054011003	11.3221547479817	11.5415652087464	11.6705421695659	12.4370373833002	11.7793629756955	9.4506248630458	11.0163119171397	7.50967812297261	11.2282967212255	11.513090334668
A0A0D9R370:S1630	FLNA	S1630	8.67056471651328	10.9039455880854	9.50546596708505	7.59601488402316	8.24194154755399	12.035226525355	7.14759056827549	11.9729923790389	8.88460132669719	8.23218247513537	8.64483446721067	7.44708867858285	7.34868846100098	8.44466937546964	7.41778429937145	7.49973440089753	5.81527443722594	9.15038870733561	9.08265545167881	9.25681492115019	8.88125626309256	7.24129287325584	8.17791948715808	11.8631612664676	8.46083216494719	6.75966614142346	6.34945714253546	9.12054300923715	8.63925450466675	7.47916452671165	8.20269652971923	6.51900225183478	8.03525161781407	7.67214871090421	8.42345852415111	8.73477284005909	7.91379798212144	11.5370097527548	6.25180557466553	6.57565872942972	7.42513594032937	7.61349078080338	6.79652978383462	9.43128249561236	8.82745644375944	8.29941290171423	8.89339181638064
A0A0D9R370:S2319	FLNA	S2319	6.95855879709878	12.4834572548972	12.4947580600448	8.19307678941495	14.4851213997395	13.4613162180257	7.62236728577667	7.05534232102517	11.9490462390538	13.1344129691357	13.7845759178784	5.98146851940108	11.790275931678	8.06258143499385	12.4415927818769	8.38199045560378	4.72595052518687	12.1018790744045	12.5610964562505	12.6380282055927	5.97316611891558	9.19978307927206	13.9591731484988	12.825691564383	12.6821740197176	7.73372395018236	12.9338625191719	9.04355447688968	14.0928657628821	13.5846525906698	8.76449469379845	14.2690260400394	14.1545815866338	9.1564451414969	13.6915114067441	5.67687064663185	7.37497232504657	13.1710102724548	9.05003027180139	8.8564188240044	12.645874532448	9.34626971884145	8.70436233067583	5.49864103528214	5.88364297795697	12.8004337241604	12.7549476468035
A0A0D9R395:S73	MECP2	S73	8.78444765723836	8.34797135991431	13.1477940463097	12.4836380216382	10.9496929887027	11.6773972197211	6.69325130990906	8.53918957262578	5.48058313059734	12.1408987091037	12.1712106453613	12.4597955545662	8.64287475119187	8.67041724153628	12.1420079974271	11.7695190203457	8.00952376950216	12.2753946827622	11.5069971568345	12.8314292014273	5.99877138422794	11.7988730198246	11.3168708850474	11.2970035348087	12.2129487382996	11.5211342484124	11.7178286718048	7.39493840965642	13.071312675875	13.157188098339	11.7498497262802	11.2191316734983	11.6014583508466	10.5517137403442	11.1057856930527	11.7819276147269	11.852389516862	11.8355387691454	12.3478198630695	13.222962465005	14.0113950730985	13.9368357685464	8.30835280531201	12.4654186056766	9.39214539550964	7.50496262285616	12.4821245576777
A0A0D9R3A5:S1507	HCFC1	S1507	13.4527138651789	14.3931776591044	14.3722914390282	11.484576943051	15.4994144998481	14.8253680399951	11.2946421876273	14.8977560616934	15.3068837595107	13.2226568070552	13.6310664339372	13.948596687717	13.6414910576266	14.6411294795092	14.3095248696971	13.2022506989116	14.4442701827084	13.5769256213373	14.2882371921071	14.0071705315833	13.5433182184683	13.2085843955257	13.648435768735	13.1772614716895	14.5280914354239	15.5583830924255	14.7520128789278	12.888277387005	14.1840422583783	14.2996027113594	13.1466791746429	16.645440773297	15.83536619635	13.4981311416654	14.3603413988802	13.6584608727511	13.0760369116988	14.4914918383495	13.7573419788993	12.6374789008951	13.9211984865368	13.4949697620576	13.9310550260897	15.1146712388095	14.4318443463749	13.297361643929	13.0618805311453
A0A0D9R3A5:S666	HCFC1	S666	11.1330433904917	13.4195053782689	12.843190311887	11.0683867221871	14.033340877612	13.5125281328456	10.68187185542	13.9464068117402	12.8381332323467	14.4181436110745	14.6944099317058	14.3101272558904	11.2350199412871	12.8451003634718	11.4517253162761	11.6599140643502	13.3953707623646	12.1414994089112	12.0805031683548	13.1714979427482	11.2904853588588	13.1957291279471	14.5967596076867	13.5654992750804	12.1934173314995	12.94776693913	12.2219461566202	11.862076634157	13.7490578731443	13.3973360517971	11.5758152462369	14.3196228857518	13.8489901676279	12.9621392440262	14.4742751828244	13.5013801078904	11.6012768195047	12.8557561759893	12.1908634675926	11.2411042059005	12.2143781633668	12.0102112467467	12.1682438355921	13.7484757599459	12.4939277667347	13.0143950549264	13.003761949658
A0A0D9R3B6:S231	BAIAP2L2	S231	9.15958701840681	11.4718602014418	11.2635936945223	9.41111594620551	12.418212710759	12.0878733307218	9.52487457455287	10.9760847603668	10.3910599301827	9.09156198512229	7.84099740064989	9.26870478463706	9.46600202540004	11.9293020206091	10.7948158943451	10.2709806252127	11.4388454833339	9.30735036839088	9.22177151850676	9.55118879116791	7.00777238034595	9.33717761118312	10.6885462518793	10.8243093903629	7.55317175910015	10.1291603532451	10.4831575569808	6.5598323233876	11.1566819385612	11.2339763063389	5.05616515234112	12.8587676647274	12.8948946642338	10.5496209210431	10.4769801394297	10.4201139999119	8.15716529136274	10.8852169849417	10.4608585200792	9.8682207400149	10.6499818233663	10.4119913763584	9.69021039425323	11.7226451997689	10.7329788163226	8.91147146636711	10.2472577540608
A0A0D9R3E6:S356	KANK2	S356	5.8275216276958	7.63972287770175	9.07184278423311	7.18861645056941	10.9419784978819	10.3143047559196	4.72450824312601	7.46449540540999	7.81240078992489	11.273148474048	7.99490560635736	11.7319837529565	6.35612462528526	5.74631873874554	6.16546667105565	8.43565545255944	7.71940653612418	8.19125446805065	7.67041321783191	7.59352879898838	5.56293247673853	10.6862025545797	11.4872954413218	11.1988776780907	9.44793294444417	10.4329795102994	8.36425876342888	4.78905491999737	9.22787621472051	5.55082515815129	6.62621225527137	5.62735183624602	6.50680581002835	11.3830900813975	10.9114893632271	11.3635343367866	6.70692020600955	8.64522838125376	8.29473819733568	8.7213533800644	6.55639764690774	4.34333025873418	6.59612453250773	8.95597194508554	9.22787460476608	10.2308273724425	10.7044062407105
A0A0D9R3E6:S375	KANK2	S375	7.91490169083456	7.03043236009387	6.80208758188609	7.96807855706644	11.589316761792	10.6216655105794	8.93821663853045	6.42403006868915	7.33702816869437	9.55656346411506	11.0854345983501	10.8134307652365	2.02193277402551	10.4966763789478	7.58414196815333	7.83236088302845	5.35058996057921	8.46208685135874	6.69352793103793	9.15308212045728	7.62528795334704	10.4781167988211	8.71686768749606	9.6783832160684	6.42351893118533	7.60841634273356	9.31823635347682	4.3903487507197	9.37412431971673	8.6110251446248	5.52099126900346	10.5137740838379	8.77246902280385	3.97321235114079	10.2384641471194	9.96521923974566	5.99266943102644	10.4373315152817	6.80309175029584	6.16478728256485	11.0704612178637	10.6250080844395	8.26207040315104	7.97196326860587	3.36680222269777	8.68131734051482	10.4642595162842
A0A0D9R3F3:S502	COG7	S502	10.9131215403763	7.35044038191147	9.30934313746431	10.6739755721869	6.66036541115073	8.61480296103713	11.4471389833719	8.04415869094872	11.362139902172	11.1393805581117	8.90631961342274	10.5275697959769	11.8751947263972	11.0637977053282	11.4369942115497	10.9915998691778	8.30528038872686	5.19067144417892	11.5701916372938	9.38022024655941	11.1986419078768	6.56536139630017	11.7303217115707	8.97410158338386	9.205681628897	11.0370506756335	11.2519300781236	11.1758240241934	10.6815021036353	10.7507746191809	3.08726083788054	9.13984130398024	11.3800260149663	8.02710291064468	11.4914506117177	9.13252706920198	10.8294752227982	8.4480530795713	8.20510845896511	7.67687564815012	9.12421241860859	10.2852167779168	8.74763453191014	11.0355871661164	11.6194445524049	11.4523373788284	11.731042749031
A0A0D9R3G5:S318	ARHGAP11A	S318	8.78761409495734	7.63448036851852	7.66198781892158	8.82146615047992	9.22061951676322	7.09419875720766	8.75762698150974	9.60366476176669	6.71702399291477	8.18492030444759	8.90484291759672	6.98353869243088	9.66562944323905	10.4541077237519	9.78029420571862	8.22682673653197	7.96402937680724	6.35058754598638	8.86103259952985	7.14868240260385	8.6264387714531	8.20690748940122	8.91775268986668	9.16090872389798	11.0213487608616	11.365269880305	11.514250403286	8.55284447396368	7.08519882395315	6.67087311693405	9.00494180855548	6.97139195968787	9.2503987231178	8.14485651715123	8.79112254212949	8.9080918448573	9.7725372182368	10.9972894354042	10.0201286169659	8.13059563797599	8.25468670827412	8.70933164317453	7.7263487502632	7.69752445612439	8.64190629105043	7.53655039844057	7.2289387444923
A0A0D9R3G5:T323	ARHGAP11A	T323	7.166030475364	8.81965637079805	8.53206877606299	8.82146615047992	8.49259044749373	9.03170096701805	6.33808367332194	9.60366476176669	8.79095014525765	8.31865810704671	5.64350255342914	8.14870408029877	9.66562944323905	10.4541077237519	9.78029420571862	4.30112731927024	7.96402937680724	8.57202130782429	9.28474067451747	9.36271570803046	9.09007525643999	9.242015705789	7.63623262500532	5.5844566674992	11.0213487608616	11.365269880305	11.514250403286	5.59608230993339	8.96831515824814	4.72422023189361	8.42216220670502	8.91594123208433	6.85693165854951	7.18847153457964	9.42864727576275	8.16649660560051	9.7725372182368	10.9972894354042	10.0201286169659	7.71360801337467	8.25468670827412	8.11858912032528	9.05121957310495	8.34337910385412	9.37197818425496	5.93450901625726	7.00265968863265
A0A0D9R3H0:S121	SPINDOC	S121	4.84080009113369	7.33353454659391	9.37638595666608	7.25981065892016	10.3423206589649	10.1599807386394	7.65146667871185	8.75012950278074	5.87698129804066	8.59496509161868	12.3151037762175	10.9872333474024	2.15358156277586	9.05699529000209	9.83094640711821	7.81081869783378	9.35164424949322	7.37383255283258	7.49639192038911	9.39895343512319	7.70278169049263	9.02955411328972	13.4017844809349	12.3759153433231	8.92976002378731	8.84402268745748	7.74403802445041	9.4914530934717	11.242697575705	7.34342240126807	6.32021840655445	11.2220961744029	6.92885129447236	11.611069627455	12.8920671085146	11.6456979411073	9.51065177169331	8.59216309193829	5.20223904585255	8.45862427622225	6.40266646899811	8.03526871740537	7.39016245507464	7.99246992733794	8.13873364521254	8.60979791548472	12.2617893089237
A0A0D9R3H8:S455	MARK2	S455	10.4213539197612	6.4152535528932	6.95929716457319	8.23426614178289	12.442318487102	12.0789364516151	8.81837314676525	7.08910283205898	9.05428900403185	7.14827978906159	2.69830173032187	8.61937605073689	10.3493997252387	6.62114906265463	8.08728331511864	8.73008227313337	11.8883834771954	11.5551925229508	6.62823625336148	4.45042389682296	9.2991797300661	3.98141878675936	9.33166057419795	9.04368491657089	12.1632141915163	11.7787714553674	12.0236282135469	8.03598119471364	7.59156014817549	11.4917193925641	9.14556973865638	13.6579946943544	13.0788285675777	8.79238048408098	9.20269901685412	11.1553692640909	10.809422692728	8.5998319467157	5.16693627820921	10.9535119292421	12.0186951547446	11.7503782520558	11.1226259017592	8.95632915531076	11.5753994709835	5.78773950125822	10.5341664227996
A0A0D9R3H8:S516	MARK2	S516	8.97699460330061	6.53175778545192	7.7004053017638	10.3186102067649	7.93300730854429	9.14107415351213	5.43679814801331	7.35236611315271	3.66209408495894	5.11682645415589	7.02880318387346	6.60935471801156	6.11640633476804	11.719146419984	11.8395636136978	8.59318280383609	11.7709425376712	8.79537846411731	8.88674361030269	11.6922777237329	11.4897967697896	8.95208926022949	12.1123434301073	12.1467446338906	10.8939933171744	11.4109261479488	6.16268002370671	9.47484474439534	8.54706189639899	8.61015685749232	12.0360523661725	8.55106964369605	4.75072511874588	11.1474332110615	12.6049654364882	8.31079520310697	5.97392463795381	11.7451571997043	12.0706758600504	6.95757181811071	8.22064421222831	8.67459816874293	11.2945996128179	7.54304109155949	8.6661198100529	6.35443578433802	7.49790701364808
A0A0D9R3J0:T513		T513	5.19685221424993	6.18413913093372	6.04892411038931	10.2028621318524	5.41872849758699	9.04480145989786	9.77674298153561	9.28401855445885	9.21047507279733	6.53983390332899	8.52264379438923	6.68225401834231	10.3806453155747	3.1313398840099	7.48993838710204	10.2486943631329	9.38485087248397	5.44940296768651	9.67238606533574	8.6845243140022	7.35607601075846	7.73016750729375	7.67217143878401	8.89254866570981	9.0615297590027	6.04824122931102	9.63465244647074	10.02663367822	9.59038894837906	9.05776338910741	7.5018108934216	8.39931385976853	7.63462185173644	7.04757723618424	6.58773355817221	9.33470177712421	10.2564297265285	9.68548918360668	9.73869278951287	8.74667898088063	9.42455772949255	7.34803835779601	8.20440128284284	7.96124655910871	9.07915538178692	6.80932689470779	7.82083639188851
A0A0D9R3J2:S484	MICALL1	S484	8.74188608511053	3.86729419409295	6.40980060430395	12.5964883175016	11.7552227500268	11.8825089289979	8.20285429021066	6.98110015071165	8.51776886238778	8.02029892568468	8.43326480325074	8.36433500608832	11.918163170827	11.527373565143	11.4592656764759	11.541887273097	11.46555358725	12.2547234291027	8.95952251970189	10.493349985157	4.23818366675263	10.1342377416169	7.61800507127165	4.39041050059993	12.1851238655888	11.3733311986466	12.1153776911643	11.713055327398	11.1983216490555	11.5893378736683	8.02067006470549	7.34430438086508	7.66327844753821	10.8761090456841	9.05432539323786	6.85245122573055	12.081203114153	11.763518651869	12.2028195150272	11.8222036708653	11.5218864259698	11.4533353466989	7.81629560519283	10.691405496296	9.39901089092043	7.28845095187017	9.18133376862646
A0A0D9R3J2:S486	MICALL1	S486	8.24207771651937	5.04719949846174	8.22949991619688	12.5964883175016	11.7552227500268	11.8825089289979	5.02649253759613	4.75296813457695	6.52594825108319	5.08453494470342	9.19797641752742	7.2412755661672	11.918163170827	11.527373565143	11.4592656764759	11.541887273097	11.46555358725	12.2547234291027	9.05880377306806	10.493349985157	6.60577682507984	10.1342377416169	8.55588558641426	8.362535340233	12.1851238655888	11.3733311986466	12.1153776911643	11.713055327398	11.1983216490555	11.5893378736683	7.59609592654679	5.77347150214398	5.5001689770053	10.8761090456841	6.77973912045438	8.28946480284337	12.081203114153	11.763518651869	12.2028195150272	11.8222036708653	11.5218864259698	11.4533353466989	9.10334953989136	10.691405496296	7.14491521189002	9.21707690471604	8.7739556779218
A0A0D9R3J2:S578	MICALL1	S578	11.8800878464388	14.1560058391754	13.4430588965335	13.4637486151628	15.3036274717112	15.2121629072645	10.5834963779633	14.5499064093922	14.1293375859996	13.6283820981596	13.787891713659	14.1393512595558	13.4920450985525	14.2499128331184	14.2381227656726	14.2044620457351	15.0247950767317	15.2021489825559	13.000224284857	14.103200546066	13.8614008198463	13.0610974052426	13.998116448841	13.8610442963046	14.4658743751329	14.8748126520257	14.9800145854999	13.8405896259848	14.9074500481079	14.8828757268809	12.2124890269926	14.6292210707413	14.5590968512603	14.4053850445958	14.6961686765258	14.9378619523208	13.4284158161906	14.8090443461103	14.9385569485068	13.5652798713282	13.9958075262163	13.8291478444937	12.8965214901924	14.5964465035612	12.7368557617191	13.859604005648	13.4897213204304
A0A0D9R3L1:S529	STIP1	S529	7.80465875832674	9.68101899136529	10.0919930003311	12.0765402918902	11.6300127041559	11.3087844648926	12.3043407708732	11.1596431233075	11.2294735290337	9.15221711948963	10.4027080290623	8.5988189259152	12.4372921497785	11.9373210321346	11.4029376965813	11.9068663704751	11.5626522771837	11.859658821098	10.9008294150328	10.4901304464517	11.2467193263478	12.2115492206401	11.6413735866024	10.9364289821371	11.8800503042623	11.1417618534267	11.2783606543098	11.8233984977757	11.5975260560384	11.2556033260379	11.6717470564879	9.66785463254593	10.3791713779936	10.7334618505374	11.4393001925147	11.6556106829378	12.6152152395978	11.4373203428154	11.7703210639654	12.0097096888462	10.632704510307	11.6349223609905	11.4827331207658	10.6688186345913	11.2460281452686	12.4528070792733	11.4971911021607
A0A0D9R3L1:S63	STIP1	S63	7.76174926458732	8.84588792566741	8.51572941664288	7.64661097489634	10.0450451836541	9.58446082100048	8.63261345471046	8.54679102673204	6.53999573024594	8.77068307561293	7.83549917799101	8.49683068933598	9.28587228280736	9.32052619812476	6.44941266104326	8.8440772465303	7.69157712231891	7.34218975170144	7.09930411567683	8.33264728832283	7.91400287136098	8.00030588647792	9.66451847584693	9.63586405956546	7.7642721782711	9.23165699796069	7.95048031024037	8.87942607616966	10.8090691147916	8.27147752207875	8.446476749176	8.63296699036674	8.69849433696245	8.39246507404612	10.7418247916126	8.90505263026313	5.85297378608846	8.38061970120406	7.60784475107909	7.36381521756054	9.09505748099551	8.78998230251804	7.643364986804	6.16658513660475	8.65805816727572	9.07146092648149	8.62085052342616
A0A0D9R3L5:S494	SSH2	S494	9.12931803381047	5.68909346929124	10.3710710823289	11.1434731025207	12.0014737605897	12.0278085097638	5.63099134628357	10.4306965645913	9.82919611351753	11.9559612102687	11.5345210817756	11.9273764031712	10.7455780019097	11.1219975112276	11.3648643716284	10.981107103727	11.9258372752704	12.1684232907369	11.0605449680791	10.5733964408294	6.87386378910476	11.3348155542725	12.2704143242715	12.1104563873137	10.3108502019852	11.3665386357172	10.9586335003339	11.1313743347562	12.3043044663227	7.48071577850703	10.0194524246419	10.0814175805784	10.3218460733449	12.8228376348696	12.2107883799687	11.9264109846222	10.383075043407	11.1976390714812	11.6444776630156	11.2530276222631	11.7951156501393	11.2743052296543	11.3988575977839	5.8394374619226	10.4253462874984	11.8952584145018	12.2630222643372
A0A0D9R3N2:S189	TRAPPC12	S189	12.7957190375761	8.12473190421785	12.218926634223	5.83613718129571	7.35037544877627	12.0506308259042	12.26105622876	8.57503591299281	8.87265983324574	11.6604948782034	7.65094117331519	12.6311329863755	11.7544223878287	7.96954415962858	8.75285757361716	12.2498586892524	5.68997932659352	12.6277130855098	7.57889478085392	8.39003908472271	12.6739158150425	8.19612777579968	13.2232496630204	8.90231818677549	11.9636722999405	8.04000571461102	12.6345621158873	11.966509096279	12.3324508873883	12.5180293384624	12.9752069732239	12.8101768721743	12.7366618059298	12.7203243125378	13.0284178166635	13.2331145810831	8.55923310752213	12.6260819010577	13.0353852532496	11.5116733757808	9.11490947663165	8.92026895643873	8.5472757529675	12.5948117933323	12.9065070878411	12.5653790526632	8.80935753782944
A0A0D9R3N6:S1152		S1152	5.40488075721391	5.67381508075554	6.15416439758255	11.5769369996868	8.53128192500895	4.54006034752005	6.22304326051187	13.0697111516839	12.5448663254276	6.39539938402178	9.00201200560197	7.86994485516416	8.00060330771063	8.75666464808092	8.74166888568459	8.56683804680801	8.10061610533148	12.6502746992306	6.27257846105131	8.40435875753722	6.06478456425874	8.13036202587796	6.66009444297812	6.89407990366373	8.06807070340788	8.02451694052193	12.5737843188407	12.3092654701558	9.46061974302805	12.5894107445396	9.156964198248	6.77750718439131	6.12234804065457	12.5180921941776	9.16641726306782	9.33902189395313	8.32752376706626	8.61417185249808	12.6550189146691	12.356963403058	7.99696076078417	8.15610740937497	12.2965875999872	8.92101576039045	6.45290090949205	9.23974560276293	9.02212780280493
A0A0D9R3N7:S371	GIT1	S371	9.88666454287912	11.2772184951189	10.2491186173053	7.57272481707115	11.7708930177157	7.41622752718586	8.71939496706537	11.4861225694814	5.52446532849045	11.4189434528906	12.7894806404783	11.9710918226975	8.77364608152685	9.38285401778778	7.64798217717123	8.77065969047448	10.5844559894375	9.82144276757668	5.89308796700343	10.6063891741842	10.1088505198731	10.9120378630885	12.8125015725616	11.9957693347129	10.7431633900814	10.8508583304321	8.80655066771872	7.75767097155075	11.6456691234658	10.7012175797842	7.6205206180858	12.1685562630574	12.2683850490004	11.9428091901816	13.0056087335186	12.3556290283898	6.46264323773665	10.2320419213179	9.79318365804846	5.43592466311216	8.38836717506824	5.44814396475655	10.9281751258992	11.7198956162915	10.3015203657694	11.0555196523581	8.69206451465676
A0A0D9R3P9:S423		S423	12.7061378442815	12.0138594221854	12.7109691298791	13.0215236593324	12.5122121854353	12.5828663678077	9.19005002450315	11.9324071444676	12.6975749132861	12.2248916079878	9.33163034832078	11.6394847138992	13.0477153559271	12.5474977900645	12.8455600059784	13.11215803791	12.3005088361417	8.51475805789473	12.9913397384613	12.7098087285763	12.930986877434	12.4065774099426	11.9462767840577	8.09918846925164	12.7348644994416	12.47527710437	12.4599852861119	13.0657925780916	12.4107452208111	12.5620718769106	13.1221941748655	11.8934108897648	9.38663107456988	12.2409372368416	9.00840531458899	12.4079354630109	13.2557940012182	12.3796435715923	12.9771434685487	12.6035870305738	12.6797878160461	12.765370398256	13.4123063300323	12.1810353601957	13.4641329112196	13.0967880389184	12.5981246156131
A0A0D9R3Q7:S16	HAUS7	S16	12.9589170657008	11.9501621446689	12.7100461507051	11.8731128202194	10.5689061984683	11.1594639417414	12.6171964139827	10.9661247451471	12.1116944295705	10.9103839456172	10.2483240574401	10.7553394946967	12.2864425209794	11.0117229745669	11.4149164720051	12.5949115714645	11.5827455700403	12.0096991820126	12.4557556318725	12.0848671389072	12.1240092935201	12.2600428967111	11.7505104784516	11.6928704205211	11.8487896325077	11.3767151888341	11.847334596206	12.351661378823	11.5954933560629	11.8924043119073	13.2760985729333	11.0797955924099	11.4083918432908	11.1091430763018	11.6766013711477	11.4426689811039	12.4765881843691	11.867956656601	12.2852063775404	12.1925767159735	11.0254694591217	11.5501209141365	13.1383295500267	11.7368480077052	12.514568571792	12.0320385593075	12.0299981278801
A0A0D9R3U8:S112	NUFIP2	S112	15.3026342230645	15.5253599294997	15.4276486145497	14.2120523315695	14.9250938795168	14.9300561229376	14.9547708658916	15.7355586180951	15.7856805962183	14.1032782034434	14.1385355780842	14.4042132313831	14.923473275444	14.6243360170552	14.6639819191018	14.4199829715045	15.0123893592484	14.9988835777922	15.7862259566961	15.2157555706868	15.593936987821	13.8207720103891	14.6201428397006	14.6328405174272	14.4742571648442	14.9632215655993	14.8336447912283	14.5163461533238	14.4431531748668	14.5191756336909	15.6401573153802	15.3438388267374	15.5778513958676	14.9709385147283	14.8248242044517	14.7986674502746	14.2127373936114	15.0298054282102	15.2360086401404	14.3932571401915	14.7503254010254	14.7230078065765	15.6399021708938	15.5272528620276	15.2081915419483	14.4778783630618	15.1056948015981
A0A0D9R3U8:S113	NUFIP2	S113	12.3163393043904	11.5344935857188	11.5966361325553	11.5010595312586	10.7055515496064	11.154226997388	12.5173875092246	11.3259575677946	11.9897941643397	7.86784332866716	8.58362313976755	10.9575783133942	11.4136792603441	11.1889786842166	10.9459340523091	11.7642319976837	11.7867982516143	2.84677453327233	11.4602005453805	11.5838660380995	11.9578747931522	7.0055147241967	11.3705273367797	11.0490212180235	7.20903574144236	10.9866522439272	11.1723433102919	11.388468700625	10.6555199746799	11.1090140545786	12.1693625874584	11.067621143532	11.3940192169696	11.9114010625648	11.8146852080321	11.0860168858381	11.6252329294409	11.8032526392419	11.7541304102483	11.8858218316417	11.474510523873	11.4252773218204	12.091397167204	11.4781098743012	12.5978325451025	12.1476022177675	12.0703108036058
A0A0D9R3U8:S212	NUFIP2	S212	10.4678548857451	10.5839543473933	7.20849020831079	12.2344104681602	9.89225569372942	11.1985538013154	11.3551999307199	9.90427498742651	10.7161459933995	9.59661879441418	9.73295740106155	9.50325909412409	12.0331988326447	10.4792917623465	11.7821738621329	12.1865346576148	10.5429653488518	11.4017298754913	10.5575932192012	11.3500078546516	11.2039081136093	11.0611114948925	9.95148211715435	8.17010089049831	11.7317695111553	10.6853690257154	11.8241972415109	12.0089581469136	11.1144865892674	10.8330667888755	11.8054068852488	9.81958499067597	10.8008730883062	11.0595927015181	10.7622439520959	11.0895930522606	11.8250603296759	11.1793380991444	12.1199168468263	12.1724653754349	9.8528778097384	10.8691237406874	11.2595381084952	10.2178492002161	11.1885141146794	11.8829380180057	11.4261633949715
A0A0D9R3U8:S214	NUFIP2	S214	6.0992243877173	8.66392074110722	9.24159634100206	10.6023533398161	6.82806050314997	9.19084532907118	9.9492842977053	6.23568419622603	10.7161459933995	6.5641740140632	6.3458692466748	6.98794156262278	10.8167163985083	8.11807991505469	10.3086035500791	10.9413622089127	8.83591313502927	10.3162322969789	9.19426497012211	9.40071437090851	10.2696319581677	8.2894980005128	8.59723413915068	6.41873609420524	10.5879247126864	8.62932330015797	10.8924811772209	10.2379919728045	9.05020442871444	9.12497801348166	10.0499168652368	6.22896936572911	9.76266509019576	4.87898422725073	8.76784789007086	7.31193676233819	9.44263082636153	9.74877151494386	10.7299228654505	10.888327497214	9.13243709794605	10.0790034362351	9.79334539818477	7.19312662170455	7.36251407957307	9.96663215767197	6.67791265146975
A0A0D9R3U8:S572	NUFIP2	S572	9.36888023455739	12.4448122500224	8.06342028102027	7.26318497881303	12.8870935590217	8.97086547848622	8.3314846061109	8.74055975894626	6.48955860776183	6.68388663824568	6.50530649953067	11.2239261574607	7.70735856723421	12.208166615141	11.7676470400326	6.17586858204989	4.93841885281579	4.60854687761423	8.08812679388851	8.19994824327708	11.7686008994463	8.24988715317508	5.36315519986941	5.88432913500474	12.4034388374633	12.9312467706924	12.7669175298338	5.39369473121436	9.25375920964191	8.80923071234284	9.38615875520252	12.7801280548069	7.71334204933857	11.6476210840876	12.1404903637062	9.15078411604707	3.68188837498789	7.92262043606988	9.26705062546327	7.93061753952595	9.18273634383279	11.2489793687026	8.93931908048773	7.57906883913134	8.40136690145557	11.5008858263897	8.67475815233389
A0A0D9R3U8:S629	NUFIP2	S629	10.6936168470321	12.7650855949478	11.4553100444464	11.0446282962037	14.7718832734281	13.9636068106448	10.6883327785435	13.5196820571491	11.2936453924511	12.8428002433571	13.9051361274329	13.0958608408214	10.8529952777552	7.73371042877218	11.6987693469406	12.4663532899217	13.5577828080549	11.0054673061304	12.598072533932	13.1206535737161	11.773744656711	11.3164042698436	13.360414948888	12.4001079384443	13.2065738663879	13.965544409656	13.7401757622142	10.7603031210786	14.5042108955115	13.5643765859161	11.8848282483997	14.2459319136206	14.4366843995561	13.0342611803308	13.8436992634408	13.0095633290256	12.7873113338223	12.8918552277231	12.3099220786016	11.8870500345233	8.05571429304131	12.226627377489	13.6313148265631	13.9335630693602	12.2270631573738	13.2724274123475	13.1847693654576
A0A0D9R3U8:S652	NUFIP2	S652	17.927542075671	18.1518375380835	18.2879673897885	16.3088371085053	17.0393587564957	16.6468610616634	18.0162118728395	17.8626199920492	17.8989929742989	17.3933755838813	17.791035199197	17.1736214622092	17.2729746134229	16.6334347641036	16.9571629300086	17.1761981220684	16.581187068171	16.8637361023688	17.6474747109672	18.0252286870148	17.7381694402814	17.5162194877229	17.8266959948384	17.9303317992365	16.9215475350742	17.2447027598027	16.9240673673036	16.5717843539149	16.8643889818366	16.6338241446414	17.729148254116	17.5027862897063	17.9712155959431	17.8852974460328	17.7210197092718	17.7154725633068	16.8161115888389	17.1465885419965	16.9024145233746	16.9662629947256	16.4663732213019	16.6709759469965	18.1158571205102	18.1909042035853	18.3012830170589	17.6796958908714	17.7254521096069
A0A0D9R3U8:S655	NUFIP2	S655	11.5297391300214	10.8596584942795	11.1895588430469	11.1337231458016	10.6696471402831	11.0540532462718	11.793657697122	11.001106332674	11.0345264268418	10.5903739194691	10.2271587835769	9.95978369374821	11.2380557984899	11.236970544277	11.2353659050076	11.6442391026709	10.1103813827123	10.3028318168778	11.4123399997022	11.4351881104729	10.6934239721309	10.7989180626853	10.313913878017	10.4219400197208	11.5418753632481	11.2447932586418	11.575175208136	11.4601122280431	10.7397824979457	10.2007234055611	11.1873406470511	10.536590223902	10.7499325705172	10.3283376479389	10.0926590119754	10.3893390014662	12.004177622414	11.2548653703107	11.3614088631853	11.3415160256138	10.0617042484038	10.8626644266111	11.5886450988136	11.6840141873759	10.7469764545715	11.6701856159484	10.53700427181
A0A0D9R3U8:S692	NUFIP2	S692	7.76340168912734	9.05030322776107	6.45339294847603	5.897053932435	6.36117755984907	8.15264848281971	7.84293743492189	2.80688368100157	7.38587627863645	10.8033383378439	10.8923346106575	11.5031485988676	8.44045029193011	8.97039408722187	6.33426011226828	9.20929164404175	6.07276880476587	7.72325972330385	9.02801622166952	7.85134970689657	5.62934905319637	7.51883456821531	11.3697412827655	11.6625925628055	9.42282011360779	8.73938925645293	8.45249849778129	8.00534144998891	9.39722125201103	7.33291227499746	7.63562485914792	8.49269713542908	8.05273866488221	8.25521909959303	10.7812124859653	6.37266897073094	7.8998482676948	8.86805641031965	7.66062626245496	7.03618915581709	6.03085061969446	6.94737468897468	8.29045591609548	9.01127366607965	8.84941701533771	5.84936827473966	10.9628368883923
A0A0D9R3V7:S346	ARHGAP31	S346	10.246662951424	7.29392383766521	9.37431542224916	9.56981717543212	11.0461242905867	11.1633699984772	10.6857414515407	11.1776487646765	10.766457997303	10.9730273191659	10.3610608269899	10.793625670687	10.9867844280757	10.8311297406709	11.0308797228585	10.3545933020772	9.03005207959709	10.1677758875623	11.3530124024277	10.7313391216018	10.967092482449	6.21890052313532	11.0147245294555	10.4744584864106	8.05890962110145	10.7282581384928	10.5150278191346	8.49579104419301	8.12408234891985	7.68761587885559	7.36410152830814	9.89420182878452	10.5769226924574	10.2641799217127	9.74638454027288	9.60341619934526	8.59419766945117	10.4031691144013	8.85307251266764	10.2903752543476	11.3852727659402	10.9080649343753	6.9696024779467	8.96975600428935	7.87020720561879	10.2870856132656	11.3512850538235
A0A0D9R3W4:S1066	TRIP12	S1066	13.0167928101641	13.6601530820191	13.9556763854475	13.0064693506628	12.3745966842489	12.8395561902122	12.9840869439322	13.4396428831412	13.4901542213843	12.0983988069246	11.8509970014766	11.9545393394559	13.9817835723283	13.9018274821725	14.0768168168864	12.982314059454	12.6861169368051	13.1066357177669	13.284876345792	13.8645087421088	13.747550249111	11.759189479064	12.2656566863817	12.0923017817468	13.1957308761349	13.7032447989884	13.4300502026016	13.3721972327874	12.3531540459955	13.1097453208845	13.1128738131347	13.1401954688383	13.1272484851866	11.6045643754239	12.1195408584401	11.7504336950942	13.3434912817014	13.6622627060538	14.0466940540292	13.7252078906696	14.5640774815629	14.4668018872866	13.3839036941848	13.6341078873895	13.5829175350155	12.7599811552698	12.8430536699853
A0A0D9R3W4:S354	TRIP12	S354	13.0703125279474	15.1064530740305	8.69473430127155	9.16094400434108	14.056691411431	14.4555289197218	7.74965752677182	14.6608522145815	14.2047766580651	14.3749336426312	8.86060028846052	14.7462225093563	5.83145869348998	8.56383143155018	14.088258195411	8.8541045869381	14.4364282662737	13.9069770985231	8.3416991480243	14.8338845698699	6.75494657296802	12.8292291354189	14.1428626769151	13.7159000425586	6.68919074657677	8.69243153898515	14.2338128417381	13.5409577998134	15.4311587236611	15.3629470589297	13.5099725860762	15.1804531113247	14.6878998747843	13.7939385383356	14.310083732355	14.2730705860081	13.0582782872685	14.2092643727951	14.261517845298	8.98082705643536	15.6834704733382	15.1662663276944	13.7128011295889	14.7677559863399	14.6777173623956	9.31038737050196	14.3450426411561
A0A0D9R3W8:S683	PRICKLE1	S683	9.66934571915916	8.0516512794442	6.87118293388473	9.2949397593311	9.30272139236247	9.52896765843212	8.20741614498601	7.98856233961834	5.21386803124132	8.85024011795525	6.44191887044283	5.89797363113105	9.52105501260507	9.43952311705115	10.4151018045812	9.6480900595183	10.3935760284557	9.48210822547535	9.883596233793	7.1693696919462	9.91410030118856	7.63392910749467	9.31978385406824	9.22681208220481	8.98002659082795	9.34574248304996	9.39849805025914	7.81855271399121	9.95656847915363	9.41368970997889	5.70102284543706	8.54207226665195	10.5550668093034	8.88100358026529	8.4978301863798	6.28754927591085	9.03211777751599	9.14664041954497	8.7933876089462	9.31637055443987	10.4131815566327	10.3880164471334	7.84185990315735	9.48989870386699	6.80971725714544	10.681932995256	4.49178558163496
A0A0D9R3X4:S161	POLR3E	S161	8.23763505420107	7.92723055901991	8.88203384107271	9.06188939773133	8.49504143695903	6.08158564769286	7.62762286666444	7.18200075888796	8.69337109583164	8.68937841159216	7.76865652859596	6.98068615648925	8.83788583032815	9.44187290077755	7.10282937264042	8.3751161210276	9.29593866897198	8.70937381806208	8.68949933188295	7.5352975115206	8.37873040389366	8.47128328047232	8.66070299743012	8.32288672588387	8.82732404918261	6.04905388283271	8.32529576715688	9.24255203117236	7.40469469370454	7.71423961029149	8.71335228024398	7.24118972673524	6.6129613014745	7.83827938816099	8.80501514896582	7.85685823100451	9.28426758251707	8.18483939674704	8.68178359503402	8.53561334406726	8.74649559619035	6.97516465304623	8.72633247894922	6.15805018428155	2.11141540706659	8.09322922891903	9.29085825260667
A0A0D9R3X4:S162	POLR3E	S162	8.23763505420107	7.92723055901991	9.08024703458061	9.06188939773133	8.49504143695903	6.08158564769286	8.37650318067243	4.77296457772736	8.69337109583164	8.8192428893952	7.76865652859596	6.32620737020467	8.96044831601856	9.44187290077755	7.10282937264042	8.3751161210276	9.29593866897198	6.86821209867327	8.68949933188295	7.5352975115206	8.37873040389366	8.47128328047232	8.66070299743012	8.32288672588387	8.82732404918261	8.77148482427189	8.32529576715688	9.24255203117236	7.40469469370454	9.15779564897415	8.86777203835625	7.24118972673524	7.72037739247573	7.83827938816099	8.80501514896582	7.85685823100451	9.28426758251707	9.25196172750172	8.68178359503402	8.58317739654992	8.74649559619035	6.97516465304623	8.72633247894922	6.15805018428155	6.8713896242302	8.09322922891903	9.29085825260667
A0A0D9R3X6:T487	EZH2	T487	3.68108281230456	10.1250156177216	10.3499846509533	9.03601141503868	11.1398819905768	11.5083859937286	9.16995746624487	10.7161677004935	10.5245587316287	9.04904568661887	10.2701058500038	9.96229601611665	10.0482514312194	10.8440757842995	10.352590479023	8.7802735517004	10.9952076493389	10.9853821349474	10.3668486091461	10.2138557720932	9.93903563138918	10.1725123116883	10.0893479229488	10.0870654370412	10.7438504690488	11.374613845328	10.5804655220952	10.0697420093039	11.4713068531696	10.6154841183991	9.26966509635671	12.0410398134687	11.4194828828911	9.0783466847563	10.5923169273555	10.7681194929127	8.42970986604533	10.4731071077194	10.9262025812402	9.77962440236015	10.9287331291768	10.2961224493145	9.04004026186006	10.8802519580407	11.1856836206106	8.43857166443423	9.27338129710033
A0A0D9R3Y5:S18	EEF2K	S18	13.1131615405077	13.7779320696932	13.16301388958	12.9158704230579	13.3033883914702	13.2982718871958	13.5814318168202	13.2653289144286	13.5511059711522	13.2647459191175	13.245418783757	13.0890834980433	13.9770073055051	13.7501477808798	13.8906917913067	13.2734413420198	13.5201919330613	13.866158150457	13.5442781316153	13.2338200589835	13.0728650589725	13.0701837066315	13.1323624002118	12.9423959031201	13.2883628006099	13.3176257515488	13.3898627739983	13.2276682850578	13.1836813050013	13.3717224363975	13.0529208897162	12.645127349439	13.0751640518506	12.6312973674219	13.0594531480913	13.19039237298	12.9612126784171	13.427471811696	13.8594685806702	12.842849934339	13.1774330426919	12.9253409608394	13.5070953772802	13.0296992142835	13.9376276590996	13.0463940122806	13.2365095683864
A0A0D9R3Z1:S763	PHF2	S763	10.35651880347	9.83773584520634	10.6114870453535	11.1033652589445	9.76581038044209	10.0234319207852	10.5175218412183	7.90769799512321	10.020281765531	9.95693437215604	10.1350872607237	7.63817583153181	9.13339918181048	9.25240515536184	5.90357136703901	10.7539089465202	9.83417273201669	5.9249082376631	6.38655180464009	11.6192971031941	10.4759957700751	9.2662129353684	9.83331546173823	9.13124067658136	10.7472604870199	10.6231643232367	9.99648909007509	11.5436045576571	10.9001000490809	10.6940800444521	11.3836715001367	10.3583840494379	10.7928093271296	9.93431911126596	10.454851401846	7.26650039228264	10.8241346852445	10.5488681517442	6.6152163609831	6.04174108220314	10.1067958405316	10.5171450074254	11.4141096129201	11.0919826724096	7.72223619001022	10.7253220276833	10.5796129164758
A0A0D9R3Z1:S766	PHF2	S766	12.9434044621098	9.83773584520634	10.6114870453535	13.7837965137058	13.8788448770474	13.6156156117725	12.16338222454	13.1678090949527	10.020281765531	13.078097362934	13.9486374111388	13.5235388911787	12.7675320217546	13.2611933766019	12.3322751981369	13.4751808363221	13.2849131514813	12.4064995327897	12.4298913257201	14.3508953855279	10.4759957700751	12.1937775421188	13.0810639823505	12.5265354478425	13.38815965359	14.2271849975748	13.7127271841304	13.8751214543197	15.200053098196	14.977903418379	13.0216671352756	14.4459205270721	14.2873648452582	9.93431911126596	13.939345107162	12.8409845794881	13.2312677238505	13.6065926678226	13.0213909102565	13.0678914374163	14.0610577394652	14.0861465139685	13.6249960400587	14.0988879883906	13.1774728828984	13.7658236144816	13.8633652820804
A0A0D9R412:S131	PHF12	S131	6.41256952028006	11.5880897166084	9.48455984910071	10.8817050501193	11.755225613769	10.1116202909594	10.1041050425825	12.0156703858804	11.3386982598046	12.0845592804886	12.3305951441857	12.1504957979687	8.95521935664777	11.8313487575608	11.6850974828516	7.39989750226376	11.9012183858572	12.06380134338	12.0184263037501	11.8644038703542	12.0992744732063	12.5477949949469	12.698386951834	13.0196714876302	11.3952516559176	11.7929934557895	12.2997145619892	6.55175786648092	8.56445158397879	8.52241345007739	8.90267207812771	11.3536520621051	11.5743277716145	12.2529043388234	12.5094841552207	7.7557757152462	9.25629210291327	12.3373800899139	11.7475144101044	11.7212231999766	11.3661573357228	11.745834115181	9.42019390894953	11.5309474198537	6.83064083361946	12.5187693539227	12.7365787574216
A0A0D9R412:S134	PHF12	S134	5.93383738259638	7.04403195384881	7.6576643330198	10.8817050501193	10.0450255037463	10.1116202909594	4.2275236168403	10.8635687633996	2.36587434118537	5.8638552024432	7.9026158481591	9.23374694371903	8.61208679510781	8.35430526670316	8.6150604234071	7.04198882717823	9.11632959122412	9.06552762518663	7.53410748648239	9.04635302860126	8.92611090449782	11.3316585523437	10.8124556118815	11.1652949497477	8.04511175912918	7.96589028461416	10.7241427728314	9.3007517180994	8.59247791222502	9.14996097994663	7.29112699995938	9.10218901203849	9.06561805844682	5.57839610913861	10.6321924208476	7.93790723880055	5.33756980892285	10.4561457956628	9.16607400656959	8.57350020280215	8.95515807579716	7.03199963286028	8.16663585093721	9.04932357745622	8.08753876440137	11.2599625660296	10.7489243468754
A0A0D9R412:T671	PHF12	T671	8.11799763177342	8.99491923192271	5.8141085757582	5.70746071857241	11.4376498937345	11.0828898436916	5.43659247336682	6.52213642031983	5.87904224686469	9.3776131602003	9.33792423257245	9.45275738433679	6.4442779257197	10.2274459348064	9.98711417584939	5.42520651267194	8.89867548871402	9.55366495844269	9.48110927126873	9.05533569932162	7.92853126820224	7.43362915707438	9.62649614287051	9.0996672022635	10.3776892907912	11.1898930343801	10.3895437202376	6.49838434948594	5.91631665912505	7.50330573276912	8.72563467361119	11.8869059980667	11.1736287619694	6.85289482487156	10.0839403761324	7.22902042650568	6.25285138027273	7.82154680980871	9.24648274991485	7.32685560655386	9.31215299325511	8.44013013756207	7.34678687576181	10.2970799192159	8.27621516170933	6.80993007765077	8.96680826456832
A0A0D9R423:S210		S210	11.6350106180839	11.1997389079211	11.2564766211951	11.9130195560624	10.1628694528711	10.3930470789928	11.8529342850657	10.6223885055093	11.5605016336664	10.9071801858121	10.1838669656734	10.8737689289344	11.973518339266	11.1476213893737	11.5502182341634	11.7344833877521	10.7200780731852	11.1083382881472	10.7362939032561	11.4551820208022	11.7954581332533	12.3986605912537	10.7315082422191	7.37601535942957	8.66106734547437	11.1995131536039	11.3349620473147	12.0070206078424	9.43757385576164	10.6596221969767	12.497773362061	9.90815836729377	10.7066556521901	11.1981312659681	10.9205879030074	10.8179120665568	11.7834706952454	10.3559944520811	11.4238584399556	12.2958021102693	10.6210808539954	3.66340376676853	11.6926870782316	9.23960877856837	11.7921762571345	11.6515421199958	10.59053299056
A0A0D9R423:S216		S216	11.6350106180839	11.1997389079211	11.2564766211951	11.9130195560624	10.1628694528711	10.3930470789928	11.8529342850657	10.6223885055093	11.5605016336664	10.9071801858121	10.1838669656734	10.8737689289344	11.973518339266	11.1476213893737	11.5502182341634	11.7344833877521	10.7200780731852	11.1083382881472	10.7362939032561	11.4551820208022	11.7954581332533	12.3986605912537	10.7315082422191	7.07219417938312	8.48985936361992	11.1995131536039	11.3349620473147	12.0070206078424	7.01859391764888	10.6596221969767	12.497773362061	9.90815836729377	10.7066556521901	11.1981312659681	10.9205879030074	10.8179120665568	11.7834706952454	10.3559944520811	11.4238584399556	12.2958021102693	10.6210808539954	6.84751150154581	11.6926870782316	8.76011441018523	11.7921762571345	11.6515421199958	10.59053299056
A0A0D9R431:S981	SLC12A6	S981	10.6628828914572	10.1545440842678	9.32433285394853	10.0663790952735	8.41124233194307	9.2185930975427	9.57127665029798	9.88163480440724	9.02042612307643	9.54639062480062	10.4953956087235	10.283869344248	10.5842330608234	7.21163610813336	9.7624639134334	9.7253277041751	10.1227164781123	9.80094640049304	9.98936816330675	10.9007274735024	9.54731905654108	8.89188138801466	10.4694903678138	9.56665408249766	8.87943848582118	10.3952513071665	10.4982016831319	10.8700107126499	11.0113427643996	11.1499653891216	6.99520327607354	10.4847043225468	6.22807648708829	9.97335246843571	10.61771000678	10.3885143934359	10.5042665188607	10.6794420698991	10.9624247131397	10.6024253339608	10.697884290207	10.7072159618652	11.0646159820073	9.74366676007745	10.6783890294465	10.8806898381729	10.529913002509
A0A0D9R432:S59	KRI1	S59	15.3340521862169	14.69866244249	15.0129085042595	15.6739863830966	14.2046808630424	14.2319047712333	15.3016332482025	14.2729110783288	14.8476485524463	15.0291387523642	14.7428152846269	14.6830241482959	15.1302004604526	14.5908711023119	14.8476705424145	15.6098738000717	14.8909087965645	15.2713582207801	14.4114619851437	15.0770661696725	15.1005057587192	15.9313973703272	14.5045377607267	15.106636696631	14.9780134698811	13.9607185743029	14.2691453290609	15.5359948635811	14.2044078514255	14.6559175758285	15.3733717121066	13.746623774225	14.0979446224522	14.3667371421622	14.5730046880955	14.6453566959819	15.8051117476507	14.5189415088079	15.0774573121035	16.0268782333515	15.0729486208081	15.3487749607754	15.1584941174627	14.6024283943387	15.0612185190055	15.4059995373019	14.9862668093165
A0A0D9R432:S64	KRI1	S64	15.3340521862169	14.69866244249	15.0129085042595	15.6739863830966	14.2046808630424	14.2319047712333	15.3016332482025	14.2729110783288	14.8476485524463	15.0291387523642	14.7428152846269	14.6830241482959	15.1302004604526	14.5908711023119	14.8476705424145	15.6098738000717	14.8909087965645	15.2713582207801	14.4114619851437	15.0770661696725	15.1005057587192	15.9313973703272	14.5045377607267	15.106636696631	14.9780134698811	13.9607185743029	14.2691453290609	15.5359948635811	14.2044078514255	14.6559175758285	15.3733717121066	13.746623774225	14.0979446224522	14.3667371421622	14.5730046880955	14.6453566959819	15.8051117476507	14.5189415088079	15.0774573121035	16.0268782333515	15.0729486208081	15.3487749607754	15.1584941174627	14.6024283943387	15.0612185190055	15.4059995373019	14.9862668093165
A0A0D9R437:S1125	ARHGEF5	S1125	6.95577164314692	8.75384769478049	8.25556565326161	5.25032918594639	8.25007882001043	5.60733033122316	9.38902311854032	9.33877730645957	8.97502048426092	15.2662880944108	8.07160627554865	7.90218276147699	5.8861727483842	9.10467480060847	7.25431081079983	14.752621226441	9.06873158536786	9.05964770774857	7.13404006999654	15.1040997908563	6.38749547140724	5.19295567088401	15.5655433170203	15.5033407552803	9.29997558645298	15.4119190834459	7.1034903781829	8.52956958391748	9.32658512502045	7.73714396445635	7.3495298852632	5.39233471424931	15.6616500757696	8.03393500348535	8.36980128581168	9.32742885837419	14.090003553608	15.3775232380466	15.3632474630636	8.03377521598216	8.91234123603328	9.06817804776064	7.21203952761672	8.25661752564911	5.13358842934875	5.33262825231961	7.42431790970418
A0A0D9R437:S446	ARHGEF5	S446	11.0675526250104	11.9371189711844	12.0265161508901	7.2580623338446	11.956900873316	11.2521331426138	11.604684933422	10.460520030486	12.387786476246	8.64835915443744	12.7349471191378	12.1711587472635	9.83778623266357	10.8852393552086	10.7213121938725	10.9289210696668	9.89440932173198	10.791486929945	12.3817252899194	12.8435724295147	12.2443625836909	9.77472419469315	12.8936011491051	12.2523784539781	11.2676415669798	11.7021923983229	9.7490763817842	10.0137201847943	11.9084922391662	11.8589381215046	12.2311750946141	13.6421471155271	13.3257945397731	12.0173218005866	12.7580057354635	12.4273343494207	11.0024749199846	11.7580957666885	10.7621177363338	8.52977454934597	10.8552320292205	10.8991203996113	9.55201273595132	10.478698091473	12.8673440952638	11.9372358053904	12.4838668397156
A0A0D9R437:S451	ARHGEF5	S451	11.0675526250104	12.0672438612113	11.5627237677528	8.43040484932698	10.9890834446819	10.3793455396908	11.1759687899194	11.2816278866223	12.2120709727546	9.34729531357769	12.8848601747211	12.3087715979831	9.83778623266357	10.5443953498175	10.7213121938725	10.9289210696668	7.58634653596323	10.9116659092159	12.3817252899194	12.8391083581919	12.3056705368799	9.97674028011635	12.6879249232322	12.3249048641585	11.2676415669798	11.3665471469632	8.6978795306587	10.0137201847943	12.1746208562516	11.7945720942112	12.2311750946141	13.9542892533204	13.6407598420061	12.1167449252226	13.0365795002529	12.5469457572082	11.0024749199846	11.4669120309619	11.0398978381328	8.52977454934597	11.277852558848	10.4876911318002	7.52630226803182	7.60405607876049	12.6600196545015	12.0736207977452	12.2648941826059
A0A0D9R438:S2159	PCNT	S2159	7.97046853201525	6.96049649781168	8.97027166528592	6.4633424253734	11.1132898442584	9.13065089309428	7.17392355306572	10.9567275927416	8.22146328222752	9.41150384469958	10.6484492773523	9.86239052063478	6.44757350490027	10.2540892434348	9.05624168927712	8.96047300382821	9.46279062648465	6.52599457515496	9.29557288466573	10.2944629497662	9.48866458036138	8.03885064390178	8.96677393168131	8.34367756814426	8.4894855269695	10.79058251826	8.95935373679644	7.27619566388404	7.87374710701972	8.45461706460786	3.90596393865574	10.0881018729673	11.0226418855556	10.2413086876524	7.52744257285328	5.76249673552155	4.0271664881784	9.83231665652464	7.69944539932931	5.1690884051184	9.40221219017528	6.02062845345348	7.01959658198873	11.2103443084314	10.4609232228704	8.36992191911746	8.95578801173155
A0A0D9R453:S41	ITGB1BP1	S41	8.45300466304346	11.6454414922588	11.5607537679474	7.20314593854612	10.443366184661	11.5917938150318	11.9404980645752	11.6221149024025	11.1405391555059	6.27347901778123	11.0014404402216	10.8750667060624	7.35494490977593	11.2495601283207	11.4359843066969	7.92438135590871	11.1356171998888	11.7470601397985	12.5329826469883	11.8809522325922	11.8641084629996	7.64042598442219	7.97529991242692	7.81010786049714	7.56603581456874	11.1211465390175	8.80531606882509	5.98369428869392	8.14792676175554	6.82318124487168	12.4261268999884	11.2260772332039	11.7815420210792	4.70216816893461	9.36447408745428	11.4682136737273	5.43588246439638	11.4353173767237	11.8278639024157	8.58925662957981	5.41886261030702	5.99025568415656	12.5498829810977	11.6778735054946	12.5794208352262	11.0485025742627	8.62445462184387
A0A0D9R455:S426	TRAF4	S426	3.71443561484691	11.0876879668076	11.4936388612957	3.25519499199379	11.349172973774	11.7497602307134	6.65631958605593	11.7811470090572	11.2417872553265	11.4535018771763	11.5884903379496	11.131791227514	10.9237132256428	11.529750481548	10.5006641014992	11.0481329382848	11.499756590154	11.064107262509	10.7466155185342	11.2550905748002	10.9032928764583	10.0666561805072	12.2538492060415	11.5179172140605	11.3348982121679	10.3029795776389	8.36875975956235	10.6110419723519	12.7910676035308	12.3232179644162	8.17156505851279	12.0332139993844	11.2075275003647	8.39982981499362	12.3915214164266	11.4414748872153	6.22065810504917	11.0049939205467	10.7752432340021	11.3362200321825	11.3573873474012	10.5998710498254	7.39208089134106	11.7794204664214	10.7745774705649	11.6871120062747	12.1847073916428
A0A0D9R470:S181	AGFG1	S181	5.20129629731434	14.8866993037019	14.2454404696357	14.8857154907874	15.4883763422828	15.3705509963638	13.2577035060414	14.8746792442899	15.1062158334313	5.25582625194821	14.3458357869151	14.2484857301683	15.2693789393246	15.0752131307991	15.2531048564368	14.9974549213232	15.5778569616536	15.7138803983519	13.850054291478	14.6247957074316	7.97236489911683	13.5876225986498	14.0256577386754	13.9770766824368	15.0306964057406	15.1127667033121	15.0241850501646	14.7071980841353	14.9317531066402	15.0337731707208	13.2502623695276	8.4119904523331	8.48443497235792	14.6948166457273	14.6338893532606	14.8439980782013	14.6298211895131	15.103428512217	15.2314933782814	14.5031804188304	7.04398791591054	8.23529440102443	13.6074949724324	14.6674033926759	15.1612005542134	14.6497676968232	14.4060251679749
A0A0D9R482:S112		S112	18.2407034271072	17.3805351513396	17.8337625834093	17.8012856466535	16.8630194027019	17.23226951234	18.2343504452552	17.0882613649159	16.793006165169	17.467855555399	16.8587195251752	16.7598206850998	17.8008520663037	17.5828455338138	17.3599805495738	18.2768338726781	17.5273342120636	17.6000052952598	17.1670088900485	17.3483972160751	16.8407232361895	17.6153183131649	17.1555635228717	17.2712153974763	17.7463624218024	16.9978877850069	17.3030502911749	17.925292874773	16.8286267768284	17.1402520083375	17.8881165227339	15.9651547677981	16.8240041109523	16.8639587920191	16.8389945440087	17.1225586064523	18.2233820762605	17.1803208840107	17.4431490974413	18.1683153617129	17.3784237174655	18.0525901079661	18.0107866958642	17.0366537939149	17.7358541182792	17.7541867670108	16.9246513038658
A0A0D9R490:S41	TAF1B	S41	7.6701608825798	10.7011259213682	11.036969652601	9.00511059139655	11.0556607658049	10.5659631937353	9.30870339051861	11.2152198594867	10.794640414704	12.0899111753244	11.7373371013216	11.6504144727462	8.07465680596924	8.7915502718223	10.3730332276223	8.6721954834387	10.3638451118783	8.54269616333012	9.72819767522773	11.0050893706194	10.6667393577186	8.90886147667438	11.6993621167143	11.1362780248974	10.3347008420594	10.9430351143221	10.6392618561577	10.0330661633255	10.7755850309147	10.8454344525547	10.5022649037761	10.3747892573316	11.1698903514577	10.5086244080136	11.5723851933921	10.632741939655	5.92077930785729	10.6040347870681	10.2987671228763	8.63970888604959	10.4982818061546	9.75351104887599	10.382027548938	11.1652249934625	9.18052101474981	10.5323752903042	10.6249049531293
A0A0D9R491:S99	BAD	S99	13.7963761670922	14.3288529327641	14.4084006110251	13.4432772823456	14.7466733486067	14.8877897265406	13.755971070926	14.6940816625518	14.3716033711798	14.4460255937017	14.1274097280234	14.3927036658445	13.5008656435896	13.4903480271639	13.5232114942897	13.5578401884717	15.0437588272284	14.7755501835176	14.3808263425511	14.1263916530864	14.1850431761942	14.6204734640406	14.9474400845853	15.5574221049056	13.310828891781	14.0002094393497	13.7561900664779	13.3001296924327	14.0199904109206	13.8998596391266	13.5949561828048	14.6672624235209	14.3136449698721	15.1244307332637	14.6726988743586	15.0585589027783	13.1171300751204	13.5885744504196	13.4275470061572	13.0833492822284	13.5347874963189	13.3860514116717	14.2051992442594	14.1953004055311	14.079082313398	14.4869206483969	14.0279588637036
A0A0D9R4A4:S17	CYS1	S17	8.81228685745292	7.60581784924988	9.18840829196358	7.5269885023365	9.16309730361755	8.92693777591035	8.91218226473626	8.49874730973365	8.75518608135638	10.1887047907645	10.7273209381151	10.2927171562186	5.66806631965471	4.79281040101793	8.9803265187335	8.38110121428674	7.38778801365353	4.94259059320757	5.06713256774125	7.58911918768653	4.98598893079027	7.76017793886713	11.1193000748845	8.77068937108617	7.26823449787812	5.46526805273477	9.18493159074171	8.9661064991054	9.36691294440018	9.17964933054459	7.83940766625366	9.71209361799427	9.29079931096101	10.5255982585719	9.25781199997677	7.23848334641819	9.11040000155732	9.33397164065805	9.17314159515567	7.41154336471992	7.76239493159985	7.46685366562045	9.7358259373376	7.90003719642466	8.93897001939152	10.4738295389015	10.7268744391211
A0A0D9R4B4:S20	RRM2	S20	11.0410447737259	13.6485873694068	12.6839316510721	9.92449606277174	13.6971697073999	12.5093221570097	9.91333560764133	13.2728404494489	12.5410720082525	9.16783620914114	10.3881302595574	9.12508694499904	10.7108633726878	12.9295614289313	11.7941713354521	11.4317802805912	12.8841395333382	12.1708959224197	11.1669921830403	12.6348735226935	11.2445705921712	8.21256586830926	9.68578040029009	8.51816692056284	12.5089841719277	13.3506484222782	12.7044796107488	11.5822605604544	12.7387025271875	12.2530748802156	10.5995136549595	14.2792384695668	14.2264212237819	8.98006318197307	11.14666277314	9.50100374849356	10.416150658545	12.5029344522616	11.9381520788146	11.5210911920259	12.0641257493378	12.1436189495434	10.9402569067463	12.8923500833958	12.5110385250837	10.267922566489	9.95385027996789
A0A0D9R4E3:S341	ZYX	S341	12.5144049786251	11.6845996263374	11.5180153230059	12.2611750542417	10.4624333370256	11.2402726711269	12.1042616971162	11.0994273524825	11.2554699770803	10.86405004299	10.436527136856	10.6483349725144	13.4064814094744	13.0084051560123	13.4378013211458	12.4197966650445	11.5128450438042	12.3647962062673	11.6682001296986	10.8090612448813	10.7060838965365	11.9261551670148	10.6309273845473	10.6233586847165	12.8389970598628	12.2224745885021	12.4946864022171	12.243375269722	11.3058896207678	11.4883796604596	11.4600836680125	10.0256109600847	9.49371004989459	10.006827460568	10.8690428577017	10.918877083591	13.5992056192426	12.6222830175814	13.159088184008	12.3970300804948	11.8900176019449	11.8480163662248	11.3196661356092	10.6304121157631	10.4791450508598	11.4593879984131	11.4764576894542
A0A0D9R4E4:S343	RPS6KA4	S343	8.13273831907759	7.36798972322335	9.0887432156571	13.6920602150354	9.16222574170952	13.9340595017606	6.51725841971817	13.9228373428285	13.437285334774	9.04441417714106	14.3345448288849	14.589098024756	13.1166139644034	8.18148308896533	7.95183708089456	8.48270694726858	14.1284260972077	9.27771405333396	14.718283234417	14.1625872433256	14.5527986769667	14.1560935067608	14.2509669841379	14.5761192933029	13.4178409932356	13.6591121119766	9.07045301137161	13.5728950652334	13.8455800623225	8.51639579936511	8.8569659002423	14.490833961656	14.2399426920478	14.8296324839345	14.2719003494398	14.578861891692	13.2334239531607	13.7969586086912	13.8959264700949	12.456625929467	13.819686387916	13.3627844377119	14.7635371381586	14.4149184308367	14.5281853165432	14.3488601096575	14.6435371332318
A0A0D9R4E4:S347	RPS6KA4	S347	6.15578038300056	11.3634139478992	3.39682148582478	13.6920602150354	12.135958881538	14.2199422775777	7.3004756096157	13.9228373428285	13.8309777201679	9.10965165829355	14.3946381439702	14.589098024756	13.1166139644034	8.42586733682672	8.70264955919723	10.1585814410113	14.1284260972077	8.24551782819912	14.718283234417	14.1625872433256	14.5527986769667	14.1560935067608	14.2509669841379	14.5761192933029	13.4178409932356	14.0311452779596	12.1212566092463	13.5728950652334	14.069356372715	12.0830644953159	8.29079191184593	14.8310705425963	14.2399426920478	14.8296324839345	14.2719003494398	14.578861891692	13.2334239531607	14.039054609153	13.8959264700949	12.456625929467	13.819686387916	13.3627844377119	14.8772029395817	14.7653398105902	14.7570659381197	14.3488601096575	14.6435371332318
[truncated: 2,020 more rows]
[truncated: 16 more columns]

## Sheet: Phosphorylated_protein Data
Protein	Gene	Mock_Rep_1	Mock_Rep_2	Mock_Rep_3	Beta-16_Rep_1	Beta-16_Rep_2	Beta-16_Rep_3	Beta-1_Rep_1	Beta-1_Rep_2	Beta-1_Rep_3	Beta-36_Rep_1	Beta-36_Rep_2	Beta-36_Rep_3	Beta-8_Rep_1	Beta-8_Rep_2	Beta-8_Rep_3	Alpha-16_Rep_1	Alpha-16_Rep_2	Alpha-16_Rep_3	Alpha-1_Rep_1	Alpha-1_Rep_2	Alpha-1_Rep_3	Alpha-36_Rep_1	Alpha-36_Rep_2	Alpha-36_Rep_3	Alpha-8_Rep_1	Alpha-8_Rep_2	Alpha-8_Rep_3	Delta-16_Rep_1	Delta-16_Rep_2	Delta-16_Rep_3	Delta-1_Rep_1	Delta-1_Rep_2	Delta-1_Rep_3	Delta-36_Rep_1	Delta-36_Rep_2	Delta-36_Rep_3	Delta-8_Rep_1	Delta-8_Rep_2	Delta-8_Rep_3	Omicron BA.1-16_Rep_1	Omicron BA.1-16_Rep_2	Omicron BA.1-16_Rep_3	Omicron BA.1-1_Rep_1	Omicron BA.1-1_Rep_2	Omicron BA.1-1_Rep_3	Omicron BA.1-36_Rep_1	Omicron BA.1-36_Rep_2	Omicron BA.1-36_Rep_3
[truncated: 1,424 more rows]
[truncated: 15 more columns]

[truncated: 6 more sheets: Clusterplot DATA, DAVID Alpha, DAVID Beta, DAVID Delta, DAVID Omicron BA.1, DAVID Omicron BA.5]
