# Supplementary material for: The comprehensive SARS-CoV-2 ‘hijackome’ knowledge base
Source: Cell Discov. 2024 Dec 9;10:125. doi: 10.1038/s41421-024-00748-y (PMC11628605; doi:10.1038/s41421-024-00748-y)
Supplement: Supplementary file 4 — Supplementary Table S4 [file 41421_2024_748_MOESM4_ESM.xlsx]

## Sheet: Info
	EV04 - Kinase phosphorysites
	Sheet	Description
	Kinase phosphorysites	Taple containing Kinase phosphosites in various hpi

## Sheet: Kinase phosphorysites
Variant	time	Fold Change	Gene_P	Gene	P	Kinase family
Alpha	1hpi	-2.78915227336268	MAP3K7 S439	MAP3K7	S439	TKL
Alpha	1hpi	5.42294180458507	MTOR T1162	MTOR	T1162	PIKK
Alpha	1hpi	3.21263712817403	RAF1 S301	RAF1	S301	TKL
Alpha	1hpi	-3.95902921486767	SRPK2 S511	SRPK2	S511	CMGC
Alpha	1hpi	-2.0091225398238	SRPK2 S508	SRPK2	S508	CMGC
Alpha	1hpi	2.16111349499794	STK10 S438	STK10	S438	STE
Alpha	1hpi	7.50588444599491	RPS6KA4 S347	RPS6KA4	S347	AGC
Alpha	1hpi	6.28139929891708	RPS6KA4 S343	RPS6KA4	S343	AGC
Alpha	1hpi	3.03297641895414	PRPF4B Y849	PRPF4B	Y849	CMGC
Alpha	1hpi	3.05994954372116	TNIK S680	TNIK	S680	STE
Alpha	1hpi	2.27926613694999	MINK1 S764	MINK1	S764	STE
Alpha	1hpi	2.15682105424426	TNIK S769	TNIK	S769	STE
Alpha	1hpi	3.22651564390659	MAP4K4 S643	MAP4K4	S643	STE
Alpha	1hpi	2.86047189478037	MAP4K4 S884	MAP4K4	S884	STE
Alpha	1hpi	2.514555764368	ATR T1989	ATR	T1989	PIKK
Alpha	1hpi	3.426474719794	LATS1 S613	LATS1	S613	AGC
Alpha	1hpi	2.46098195992926	PKN1 S562	PKN1	S562	AGC
Alpha	1hpi	5.09925344508724	PKN2 S582	PKN2	S582	AGC
Alpha	1hpi	-2.88438968663868	MASTL S484	MASTL	S484	AGC
Alpha	1hpi	2.95322013776961	MARK2 S516	MARK2	S516	CAMK
Alpha	1hpi	2.00739684455842	CDK13 S525	CDK13	S525	CMGC
Beta	1h	2.03114698789538	MAP3K7 S439	MAP3K7	S439	TKL
Beta	1h	3.54689713898496	MTOR T1162	MTOR	T1162	PIKK
Beta	1h	2.34898575391452	RIPK2 S434	RIPK2	S434	TKL
Beta	1h	3.11841210542372	RAF1 S621	RAF1	S621	TKL
Beta	1h	-2.85345107357019	CDK7 T170	CDK7	T170	CMGC
Beta	1h	-3.77455858428404	SRPK2 S511	SRPK2	S511	CMGC
Beta	1h	2.08225612177171	STK10 S438	STK10	S438	STE
Beta	1h	4.71275828529585	RPS6KA4 S347	RPS6KA4	S347	AGC
Beta	1h	3.0959699464542	RPS6KA4 S343	RPS6KA4	S343	AGC
Beta	1h	-2.60023520839842	PRPF4B S520	PRPF4B	S520	CMGC
Beta	1h	-2.57971430679444	PRPF4B S518	PRPF4B	S518	CMGC
Beta	1h	2.48077905325303	MAP4K4 S884	MAP4K4	S884	STE
Beta	1h	2.03077503500495	MAP4K4 S643	MAP4K4	S643	STE
Beta	1h	2.40974884660053	CHEK1 S553	CHEK1	S553	CAMK
Beta	1h	5.08667722722842	LATS1 S613	LATS1	S613	AGC
Beta	1h	4.53469997888332	PKN2 S582	PKN2	S582	AGC
Beta	1h	3.90149166407389	TRPM7 S1404	TRPM7	S1404	Alpha
Beta	1h	-4.19170150904781	AAK1 S572	AAK1	S572	Other
Beta	1h	-5.6936547300291	AAK1 T568	AAK1	T568	Other
Beta	1h	3.96828274746762	CDK18 Y155	CDK18	Y155	CMGC
Beta	1h	-3.87202453525325	CAMK1 S363	CAMK1	S363	CAMK
Beta	1h	-3.23787331574745	ULK1 S489	ULK1	S489	Other
Beta	1h	-2.55481873751383	CDC42BPB S1272	CDC42BPB	S1272	AGC
Beta	1h	-2.38244944985098	MAP3K2 S240	MAP3K2	S240	STE
Beta	1h	-2.25263311479712	MARK2 S516	MARK2	S516	CAMK
Beta	1h	2.13275213436563	BUB1 S596	BUB1	S596	Other
Delta	1h	5.0462169302178	MTOR T1162	MTOR	T1162	PIKK
Delta	1h	-6.90384827701014	SRPK2 S511	SRPK2	S511	CMGC
Delta	1h	-3.75053359262175	SRPK2 S508	SRPK2	S508	CMGC
Delta	1h	5.48192977658849	RPS6KA4 S347	RPS6KA4	S347	AGC
Delta	1h	4.33275709866268	RPS6KA4 S343	RPS6KA4	S343	AGC
Delta	1h	-4.28627855922083	RPS6KA4 S678	RPS6KA4	S678	AGC
Delta	1h	-2.82343510351505	CSNK1D S382	CSNK1D	S382	CK1
Delta	1h	3.23542653462423	TNIK S680	TNIK	S680	STE
Delta	1h	2.25448974417838	MAP3K5 S878	MAP3K5	S878	STE
Delta	1h	2.67763739471109	MINK1 S764	MINK1	S764	STE
Delta	1h	2.04411213456613	MAP4K4 S884	MAP4K4	S884	STE
Delta	1h	2.40760907547984	MAP3K5 S874	MAP3K5	S874	STE
Delta	1h	3.42126213611982	ATR T1989	ATR	T1989	PIKK
Delta	1h	5.66629906202121	LATS1 S613	LATS1	S613	AGC
Delta	1h	-3.87459888773443	LATS1 S464	LATS1	S464	AGC
Delta	1h	3.92660749996109	PKN1 S562	PKN1	S562	AGC
Delta	1h	2.83015130658859	TRPM7 S1404	TRPM7	S1404	Alpha
Delta	1h	6.92424422210151	CDK18 Y155	CDK18	Y155	CMGC
Delta	1h	-2.29829437399549	PAK2 S197	PAK2	S197	STE
Delta	1h	-2.81636206464982	PAK2 S132	PAK2	S132	STE
Delta	1h	2.23308787244346	CDK12 S681	CDK12	S681	CMGC
Delta	1h	2.23308787244346	CDK12 S685	CDK12	S685	CMGC
Delta	1h	4.02882945445362	MARK2 S455	MARK2	S455	CAMK
Omicron BA.1	1h	-3.91948405863663	MAP3K7 S439	MAP3K7	S439	TKL
Omicron BA.1	1h	3.00257978826187	MTOR T1162	MTOR	T1162	PIKK
Omicron BA.1	1h	2.18064845742976	RIPK2 S434	RIPK2	S434	TKL
Omicron BA.1	1h	-2.16253464498156	SRPK2 S508	SRPK2	S508	CMGC
Omicron BA.1	1h	-3.09897535775681	SRPK2 S511	SRPK2	S511	CMGC
Omicron BA.1	1h	7.82786429052235	RPS6KA4 S347	RPS6KA4	S347	AGC
Omicron BA.1	1h	6.37238987586015	RPS6KA4 S343	RPS6KA4	S343	AGC
Omicron BA.1	1h	-2.15424136748528	MAP4K4 S734	MAP4K4	S734	STE
Omicron BA.1	1h	2.9342403294909	MAP3K5 S874	MAP3K5	S874	STE
Omicron BA.1	1h	2.25081581162489	MINK1 S764	MINK1	S764	STE
Omicron BA.1	1h	2.19650053204053	MINK1 S779	MINK1	S779	STE
Omicron BA.1	1h	2.90063679145586	TNIK S680	TNIK	S680	STE
Omicron BA.1	1h	3.32873509310832	TNIK S769	TNIK	S769	STE
Omicron BA.1	1h	2.89887429846624	CHEK1 S553	CHEK1	S553	CAMK
Omicron BA.1	1h	7.51507921813215	PKN2 S582	PKN2	S582	AGC
Omicron BA.1	1h	4.47670591631539	PKN1 S562	PKN1	S562	AGC
Omicron BA.1	1h	-6.15835456317215	AAK1 S572	AAK1	S572	Other
Omicron BA.1	1h	-2.94699008750115	AAK1 T568	AAK1	T568	Other
Omicron BA.1	1h	-2.82784366567686	NEK1 S1154	NEK1	S1154	Other
Omicron BA.1	1h	-2.06466999965639	MASTL S484	MASTL	S484	AGC
Omicron BA.1	1h	2.58870304904806	BUB1 S596	BUB1	S596	Other
Omicron BA.1	1h	2.04152157629358	TLK1 S49	TLK1	S49	Other
Omicron BA.1	1h	2.61948329694195	MARK2 S455	MARK2	S455	CAMK
Omicron BA.5	1h	3.47651189367858	MAP3K7 S389	MAP3K7	S389	TKL
Omicron BA.5	1h	3.96719835013754	MTOR T1162	MTOR	T1162	PIKK
Omicron BA.5	1h	-2.7725784020667	SRPK2 S508	SRPK2	S508	CMGC
Omicron BA.5	1h	2.04586920946107	STK10 S438	STK10	S438	STE
Omicron BA.5	1h	4.87876876638217	RPS6KA4 S347	RPS6KA4	S347	AGC
Omicron BA.5	1h	4.30452862269158	RPS6KA4 S343	RPS6KA4	S343	AGC
Omicron BA.5	1h	-2.79752575377065	CSNK1D S382	CSNK1D	S382	CK1
Omicron BA.5	1h	2.85487087707123	TNIK S680	TNIK	S680	STE
Omicron BA.5	1h	-2.09629332897075	MAP4K4 S643	MAP4K4	S643	STE
Omicron BA.5	1h	2.44467507067611	TNIK S769	TNIK	S769	STE
Omicron BA.5	1h	2.6405820084907	MAP4K4 S884	MAP4K4	S884	STE
Omicron BA.5	1h	2.36493356634129	MINK1 S764	MINK1	S764	STE
Omicron BA.5	1h	2.52568251108869	CHEK1 S553	CHEK1	S553	CAMK
Omicron BA.5	1h	-2.66763667312358	LATS1 S464	LATS1	S464	AGC
Omicron BA.5	1h	3.88536814096341	LATS1 S613	LATS1	S613	AGC
Omicron BA.5	1h	7.39907233188641	PKN2 S582	PKN2	S582	AGC
Omicron BA.5	1h	-2.23928627618535	PKN1 S562	PKN1	S562	AGC
Omicron BA.5	1h	2.59971663850183	SLK S780	SLK	S780	STE
Omicron BA.5	1h	2.39104600843652	TRPM7 S1404	TRPM7	S1404	Alpha
Omicron BA.5	1h	-6.0343504441967	AAK1 S572	AAK1	S572	Other
Omicron BA.5	1h	-4.5248824682759	AAK1 T568	AAK1	T568	Other
Omicron BA.5	1h	2.26817592679422	CDK18 Y155	CDK18	Y155	CMGC
Omicron BA.5	1h	-3.20239285661633	CDC42BPB S1272	CDC42BPB	S1272	AGC
Omicron BA.5	1h	2.6923323918834	MAP3K2 S240	MAP3K2	S240	STE
Omicron BA.5	1h	2.2236381536159	BUB1 S596	BUB1	S596	Other
Alpha	8hpi	4.33017681176879	MAP3K7 S389	MAP3K7	S389	TKL
Alpha	8hpi	3.27584376290977	RIPK2 S434	RIPK2	S434	TKL
Alpha	8hpi	3.95140455522657	MTOR T1162	MTOR	T1162	PIKK
Alpha	8hpi	2.36013290835557	RAF1 S621	RAF1	S621	TKL
Alpha	8hpi	3.56779528930554	MAPK1 T185	MAPK1	T185	CMGC
Alpha	8hpi	-4.55694729731215	SRPK2 S511	SRPK2	S511	CMGC
Alpha	8hpi	-3.64972510287534	SRPK2 S508	SRPK2	S508	CMGC
Alpha	8hpi	2.43886545321908	STK10 S438	STK10	S438	STE
Alpha	8hpi	6.21807568790565	RPS6KA4 S347	RPS6KA4	S347	AGC
Alpha	8hpi	3.85264495287525	RPS6KA4 S343	RPS6KA4	S343	AGC
Alpha	8hpi	-4.51025415354839	RPS6KA4 S678	RPS6KA4	S678	AGC
Alpha	8hpi	2.60544213740566	CSNK1D S382	CSNK1D	S382	CK1
Alpha	8hpi	3.13852975121814	MINK1 S779	MINK1	S779	STE
Alpha	8hpi	3.20028978738603	TNIK S680	TNIK	S680	STE
Alpha	8hpi	2.93721218436416	MINK1 S764	MINK1	S764	STE
Alpha	8hpi	3.45818511221725	MAP3K5 S874	MAP3K5	S874	STE
Alpha	8hpi	2.60588001567531	MAP3K5 S878	MAP3K5	S878	STE
Alpha	8hpi	3.49006970742419	MAP4K4 S643	MAP4K4	S643	STE
Alpha	8hpi	2.64794987922993	MAP4K4 S884	MAP4K4	S884	STE
Alpha	8hpi	3.5713086213479	ATR T1989	ATR	T1989	PIKK
Alpha	8hpi	3.69965326593866	CHEK1 S553	CHEK1	S553	CAMK
Alpha	8hpi	5.32851810187931	LATS1 S613	LATS1	S613	AGC
Alpha	8hpi	3.40918839122366	PKN1 S562	PKN1	S562	AGC
Alpha	8hpi	4.83434010877551	PKN2 S582	PKN2	S582	AGC
Alpha	8hpi	2.62859672276653	PKN2 S359	PKN2	S359	AGC
Alpha	8hpi	2.19668607262299	SLK S780	SLK	S780	STE
Alpha	8hpi	3.20567462598302	PRKD3 S41	PRKD3	S41	CAMK
Alpha	8hpi	4.05656974106767	MARK2 S455	MARK2	S455	CAMK
Alpha	8hpi	-2.6459489209645	CAMK1 S363	CAMK1	S363	CAMK
Alpha	8hpi	2.17148187192219	CDK12 S681	CDK12	S681	CMGC
Alpha	8hpi	2.17148187192219	CDK12 S685	CDK12	S685	CMGC
Alpha	8hpi	2.33114583132497	NEK4 S563	NEK4	S563	Other
Alpha	8hpi	2.3671693459185	MAP3K11 S507	MAP3K11	S507	TKL
Alpha	8hpi	2.62169910492367	PBK S59	PBK	S59	Other
Beta	8h	3.14122531776914	MAP3K7 S389	MAP3K7	S389	TKL
Beta	8h	5.18109529253707	MTOR T1162	MTOR	T1162	PIKK
Beta	8h	2.83769233692168	RIPK2 S434	RIPK2	S434	TKL
Beta	8h	3.32402207207744	RAF1 S621	RAF1	S621	TKL
Beta	8h	-3.93061887907171	SRPK2 S511	SRPK2	S511	CMGC
Beta	8h	-4.34726036251577	SRPK2 S508	SRPK2	S508	CMGC
Beta	8h	2.77332969189794	STK10 S438	STK10	S438	STE
Beta	8h	3.1097050145676	RPS6KA4 S347	RPS6KA4	S347	AGC
Beta	8h	-2.54138639204994	RPS6KA4 S678	RPS6KA4	S678	AGC
Beta	8h	-3.1372911922192	PRPF4B Y849	PRPF4B	Y849	CMGC
Beta	8h	2.61329775745596	CSNK1D S382	CSNK1D	S382	CK1
Beta	8h	3.4590752979845	MINK1 S779	MINK1	S779	STE
Beta	8h	2.86030856536443	MAP4K4 S884	MAP4K4	S884	STE
Beta	8h	2.33048080208363	MINK1 S764	MINK1	S764	STE
Beta	8h	2.63787267061486	TNIK S680	TNIK	S680	STE
Beta	8h	2.7909308150469	ATR T1989	ATR	T1989	PIKK
Beta	8h	2.04609340320838	CHEK1 S553	CHEK1	S553	CAMK
Beta	8h	4.41396296681589	LATS1 S613	LATS1	S613	AGC
Beta	8h	-2.74011979948439	LATS1 S464	LATS1	S464	AGC
Beta	8h	4.60249970590749	PKN1 S562	PKN1	S562	AGC
Beta	8h	4.46350831164547	PKN2 S582	PKN2	S582	AGC
Beta	8h	2.389626282886	TRPM7 S1404	TRPM7	S1404	Alpha
Beta	8h	-6.04588003448355	AAK1 S572	AAK1	S572	Other
Beta	8h	-5.94362006815597	AAK1 T568	AAK1	T568	Other
Beta	8h	5.50115963302684	CDK18 Y155	CDK18	Y155	CMGC
Beta	8h	-3.06510405089481	CAMK1 S363	CAMK1	S363	CAMK
Beta	8h	2.76658974977672	PBK S59	PBK	S59	Other
Beta	8h	-2.21060364884123	CDK13 S437	CDK13	S437	CMGC
Beta	8h	2.15531955931117	MARK2 S516	MARK2	S516	CAMK
Beta	8h	2.14263652931526	BUB1 S596	BUB1	S596	Other
Delta	8h	4.81286043988553	MTOR T1162	MTOR	T1162	PIKK
Delta	8h	2.16191400512753	RIPK2 S434	RIPK2	S434	TKL
Delta	8h	4.1498500425174	RAF1 S621	RAF1	S621	TKL
Delta	8h	3.1107213394116	MAPK1 T185	MAPK1	T185	CMGC
Delta	8h	-2.21815105583534	SRPK2 S511	SRPK2	S511	CMGC
Delta	8h	-2.20494795562124	SRPK2 S508	SRPK2	S508	CMGC
Delta	8h	2.23104537897991	STK10 S438	STK10	S438	STE
Delta	8h	6.75079640522801	RPS6KA4 S347	RPS6KA4	S347	AGC
Delta	8h	5.44561259132958	RPS6KA4 S343	RPS6KA4	S343	AGC
Delta	8h	-2.34222751674009	RPS6KA4 S678	RPS6KA4	S678	AGC
Delta	8h	2.42604263577046	CSNK1D S382	CSNK1D	S382	CK1
Delta	8h	3.22791555532126	MINK1 S779	MINK1	S779	STE
Delta	8h	2.8307908402326	TNIK S680	TNIK	S680	STE
Delta	8h	2.51631800475376	MINK1 S764	MINK1	S764	STE
Delta	8h	2.81481111202137	MAP4K4 S884	MAP4K4	S884	STE
Delta	8h	2.09730738193689	MAP4K4 S643	MAP4K4	S643	STE
Delta	8h	2.13148951726749	MAP4K4 S734	MAP4K4	S734	STE
Delta	8h	3.35126246049552	ATR T1989	ATR	T1989	PIKK
Delta	8h	4.26212423089581	LATS1 S613	LATS1	S613	AGC
Delta	8h	5.12069407977569	PKN1 S562	PKN1	S562	AGC
Delta	8h	2.61419575705786	SLK S780	SLK	S780	STE
Delta	8h	-4.65254439143978	AAK1 S572	AAK1	S572	Other
Delta	8h	-2.35433996807895	AAK1 T568	AAK1	T568	Other
Delta	8h	2.19353333573072	MARK2 S516	MARK2	S516	CAMK
Delta	8h	-2.03254442295104	PAK2 S132	PAK2	S132	STE
Delta	8h	-2.00756500620507	ULK1 S489	ULK1	S489	Other
Delta	8h	2.30987916632655	CDK13 S525	CDK13	S525	CMGC
Omicron BA.1	8h	4.65382422999299	MAP3K7 S389	MAP3K7	S389	TKL
Omicron BA.1	8h	2.21170020731141	MAP3K7 S439	MAP3K7	S439	TKL
Omicron BA.1	8h	3.15264288753019	MTOR T1162	MTOR	T1162	PIKK
Omicron BA.1	8h	2.8066182948364	RIPK2 S434	RIPK2	S434	TKL
Omicron BA.1	8h	-3.81726479308879	SRPK2 S508	SRPK2	S508	CMGC
Omicron BA.1	8h	-3.12924573409765	SRPK2 S511	SRPK2	S511	CMGC
Omicron BA.1	8h	2.57241228167374	STK10 S438	STK10	S438	STE
Omicron BA.1	8h	6.41452757774161	RPS6KA4 S347	RPS6KA4	S347	AGC
Omicron BA.1	8h	5.12098985488798	RPS6KA4 S343	RPS6KA4	S343	AGC
Omicron BA.1	8h	-2.36848778409237	RPS6KA4 S678	RPS6KA4	S678	AGC
Omicron BA.1	8h	2.21615411277837	MAP4K4 S643	MAP4K4	S643	STE
Omicron BA.1	8h	2.57144961664552	MAP4K4 S734	MAP4K4	S734	STE
Omicron BA.1	8h	3.06893180370362	MAP3K5 S874	MAP3K5	S874	STE
Omicron BA.1	8h	2.59062791004183	MINK1 S764	MINK1	S764	STE
Omicron BA.1	8h	2.21662670716168	MAP3K5 S878	MAP3K5	S878	STE
Omicron BA.1	8h	2.92090938461737	MAP4K4 S884	MAP4K4	S884	STE
Omicron BA.1	8h	2.29365380706158	ATR T1989	ATR	T1989	PIKK
Omicron BA.1	8h	4.61693414980445	CHEK1 S553	CHEK1	S553	CAMK
Omicron BA.1	8h	3.83635131736815	LATS1 S613	LATS1	S613	AGC
Omicron BA.1	8h	3.98696002719089	PKN2 S582	PKN2	S582	AGC
Omicron BA.1	8h	4.93263571356902	PKN1 S562	PKN1	S562	AGC
Omicron BA.1	8h	2.4863671990185	TRPM7 S1404	TRPM7	S1404	Alpha
Omicron BA.1	8h	-4.55111490779708	AAK1 S572	AAK1	S572	Other
Omicron BA.1	8h	-6.788060540131	AAK1 T568	AAK1	T568	Other
Omicron BA.1	8h	-2.12910608601644	CDK13 S525	CDK13	S525	CMGC
Omicron BA.1	8h	-2.26712479238286	CAMK1 S363	CAMK1	S363	CAMK
Omicron BA.1	8h	2.28927385324703	BUB1 S596	BUB1	S596	Other
Omicron BA.1	8h	2.7025083867564	PBK S59	PBK	S59	Other
Omicron BA.1	8h	2.63892031516782	MARK2 S516	MARK2	S516	CAMK
Omicron BA.5	8h	-3.70026051775316	MAP3K7 S439	MAP3K7	S439	TKL
Omicron BA.5	8h	-3.60664891653013	EIF2AK3 S564	EIF2AK3	S564	Other
Omicron BA.5	8h	3.41261671073425	RPS6KA4 S347	RPS6KA4	S347	AGC
Omicron BA.5	8h	2.03796100222275	RPS6KA4 S343	RPS6KA4	S343	AGC
Omicron BA.5	8h	-6.02182394265017	RPS6KA4 S678	RPS6KA4	S678	AGC
Omicron BA.5	8h	-4.84421981833895	PRPF4B Y849	PRPF4B	Y849	CMGC
Omicron BA.5	8h	2.33447829241273	TNIK S680	TNIK	S680	STE
Omicron BA.5	8h	2.48872256720392	MAP4K4 S734	MAP4K4	S734	STE
Omicron BA.5	8h	2.2374483146646	ATR T1989	ATR	T1989	PIKK
Omicron BA.5	8h	2.89884351753752	PKN1 S562	PKN1	S562	AGC
Omicron BA.5	8h	-3.85882577523909	AAK1 S572	AAK1	S572	Other
Omicron BA.5	8h	-2.49915155151804	AAK1 T568	AAK1	T568	Other
Omicron BA.5	8h	4.66484502172644	CDK18 Y155	CDK18	Y155	CMGC
Omicron BA.5	8h	-2.36383517999924	TLK1 S49	TLK1	S49	Other
Omicron BA.5	8h	-3.36347346558276	PAK1 S203	PAK1	S203	STE
Omicron BA.5	8h	-2.0682013906519	PAK2 S141	PAK2	S141	STE
Omicron BA.5	8h	-3.10136356480719	CDK13 S437	CDK13	S437	CMGC
Omicron BA.5	8h	-2.27926335616455	CDK13 S439	CDK13	S439	CMGC
Omicron BA.5	8h	-3.49777252374568	PAK4 S516	PAK4	S516	STE
Omicron BA.5	8h	-5.97506438110935	ULK1 S489	ULK1	S489	Other
Omicron BA.5	8h	-2.71560842745707	CAMK1 S363	CAMK1	S363	CAMK
Omicron BA.5	8h	-2.47569366021991	PAK2 S132	PAK2	S132	STE
Omicron BA.5	8h	2.26445541726194	STK39 S283	STK39	S283	STE
Alpha	16hpi	2.05223696583631	MAP3K7 S439	MAP3K7	S439	TKL
Alpha	16hpi	5.5763927028059	MTOR T1162	MTOR	T1162	PIKK
Alpha	16hpi	2.57994671897751	RAF1 S621	RAF1	S621	TKL
Alpha	16hpi	-4.22281983158219	MAPK7 S729	MAPK7	S729	CMGC
Alpha	16hpi	2.99812441959407	MAPK1 Y187	MAPK1	Y187	CMGC
Alpha	16hpi	2.06891017284159	MAPK1 T185	MAPK1	T185	CMGC
Alpha	16hpi	2.69803327628561	STK10 S438	STK10	S438	STE
Alpha	16hpi	3.87216984989786	RPS6KA4 S347	RPS6KA4	S347	AGC
Alpha	16hpi	2.43312527995073	RPS6KA4 S343	RPS6KA4	S343	AGC
Alpha	16hpi	5.49932693288448	MINK1 S779	MINK1	S779	STE
Alpha	16hpi	3.06003623336003	TNIK S680	TNIK	S680	STE
Alpha	16hpi	2.45613970028166	MINK1 S764	MINK1	S764	STE
Alpha	16hpi	2.56966324106017	TNIK S769	TNIK	S769	STE
Alpha	16hpi	2.34547842281969	MAP3K5 S874	MAP3K5	S874	STE
Alpha	16hpi	2.69171480685	MAP4K4 S643	MAP4K4	S643	STE
Alpha	16hpi	2.30745987237877	MAP4K4 S734	MAP4K4	S734	STE
Alpha	16hpi	3.93393052194614	ATR T1989	ATR	T1989	PIKK
Alpha	16hpi	4.98196055975565	CHEK1 S553	CHEK1	S553	CAMK
Alpha	16hpi	3.30892921406036	LATS1 S613	LATS1	S613	AGC
Alpha	16hpi	-2.56248936084169	LATS1 S464	LATS1	S464	AGC
Alpha	16hpi	2.10810809937817	PKN2 S582	PKN2	S582	AGC
Alpha	16hpi	2.7167907762645	SLK S780	SLK	S780	STE
Alpha	16hpi	3.06835522068826	PRKD3 S41	PRKD3	S41	CAMK
Alpha	16hpi	2.79258454535066	MARK2 S455	MARK2	S455	CAMK
Alpha	16hpi	-5.4517167435939	ULK1 S470	ULK1	S470	Other
Alpha	16hpi	-2.03955751022552	MASTL S302	MASTL	S302	AGC
Alpha	16hpi	-2.71960636147822	NEK1 S1154	NEK1	S1154	Other
Alpha	16hpi	3.33503797716356	CDK18 Y155	CDK18	Y155	CMGC
Beta	16h	2.07521209903901	MAP3K7 S439	MAP3K7	S439	TKL
Beta	16h	5.3571926939626	MTOR T1162	MTOR	T1162	PIKK
Beta	16h	-2.22881206131334	EIF2AK3 S564	EIF2AK3	S564	Other
Beta	16h	-2.10868175568357	MAPK7 S729	MAPK7	S729	CMGC
Beta	16h	2.57818122204944	MAPK1 Y187	MAPK1	Y187	CMGC
Beta	16h	4.1556682457949	MAPK1 T185	MAPK1	T185	CMGC
Beta	16h	-2.44095694983611	SRPK2 S511	SRPK2	S511	CMGC
Beta	16h	2.50751478856907	STK10 S438	STK10	S438	STE
Beta	16h	6.37731518580885	RPS6KA4 S347	RPS6KA4	S347	AGC
Beta	16h	4.06629140018249	RPS6KA4 S343	RPS6KA4	S343	AGC
Beta	16h	-2.84102086132047	PRPF4B Y849	PRPF4B	Y849	CMGC
Beta	16h	4.30120228435759	TNIK S769	TNIK	S769	STE
Beta	16h	3.87316788250449	MINK1 S779	MINK1	S779	STE
Beta	16h	3.32857265038907	MAP3K5 S878	MAP3K5	S878	STE
Beta	16h	3.63076927200841	MAP3K5 S874	MAP3K5	S874	STE
Beta	16h	3.03203419970916	TNIK S680	TNIK	S680	STE
Beta	16h	2.86908561295369	MAP4K4 S734	MAP4K4	S734	STE
Beta	16h	3.94125580609704	ATR T1989	ATR	T1989	PIKK
Beta	16h	5.03248602379842	LATS1 S613	LATS1	S613	AGC
Beta	16h	4.24837764655212	PKN1 S562	PKN1	S562	AGC
Beta	16h	5.15937073897291	PKN2 S582	PKN2	S582	AGC
Beta	16h	3.09907545503106	PRKD3 S41	PRKD3	S41	CAMK
Beta	16h	5.34589385070444	CDK18 Y155	CDK18	Y155	CMGC
Beta	16h	-2.38108214908035	CAMK1 S363	CAMK1	S363	CAMK
Beta	16h	2.98653881442413	MARK2 S455	MARK2	S455	CAMK
Beta	16h	-2.33834175856495	CDK14 S95	CDK14	S95	CMGC
Beta	16h	2.46743745475034	NEK4 S563	NEK4	S563	Other
Delta	16h	3.92177073658724	MAP3K7 S389	MAP3K7	S389	TKL
Delta	16h	2.77702464472764	RIPK2 S434	RIPK2	S434	TKL
Delta	16h	6.19078268081712	RAF1 S621	RAF1	S621	TKL
Delta	16h	-2.490226173701	MAPK7 T731	MAPK7	T731	CMGC
Delta	16h	-3.26360822981606	MAPK7 S729	MAPK7	S729	CMGC
Delta	16h	3.67026314202334	MAPK1 T185	MAPK1	T185	CMGC
Delta	16h	2.09277611827787	MAPK1 Y187	MAPK1	Y187	CMGC
Delta	16h	2.46592741159764	STK10 S438	STK10	S438	STE
Delta	16h	6.26976670551325	RPS6KA4 S347	RPS6KA4	S347	AGC
Delta	16h	3.78179988965432	RPS6KA4 S343	RPS6KA4	S343	AGC
Delta	16h	5.11574098640159	MINK1 S779	MINK1	S779	STE
Delta	16h	3.23160530609709	TNIK S680	TNIK	S680	STE
Delta	16h	3.41856296547467	MAP3K5 S878	MAP3K5	S878	STE
Delta	16h	3.01062201569446	MINK1 S764	MINK1	S764	STE
Delta	16h	2.02501389952683	MAP4K4 S884	MAP4K4	S884	STE
Delta	16h	2.33672494978192	MAP4K4 S643	MAP4K4	S643	STE
Delta	16h	4.02762820725795	MAP3K5 S874	MAP3K5	S874	STE
Delta	16h	3.77049663153567	ATR T1989	ATR	T1989	PIKK
Delta	16h	3.89417364490523	CHEK1 S553	CHEK1	S553	CAMK
Delta	16h	4.41211298904777	LATS1 S613	LATS1	S613	AGC
Delta	16h	4.93225652472283	PKN2 S582	PKN2	S582	AGC
Delta	16h	4.44189890792612	PKN1 S562	PKN1	S562	AGC
Delta	16h	2.04281734713982	PKN1 S918	PKN1	S918	AGC
Delta	16h	-2.37254023944432	AAK1 S572	AAK1	S572	Other
Delta	16h	-2.55245291248603	CAMK1 S363	CAMK1	S363	CAMK
Delta	16h	2.35266878043587	NEK4 S563	NEK4	S563	Other
Delta	16h	2.85873558830926	CDK13 S525	CDK13	S525	CMGC
Delta	16h	2.0406172847628	CDK12 S681	CDK12	S681	CMGC
Delta	16h	2.0406172847628	CDK12 S685	CDK12	S685	CMGC
Omicron BA.1	16h	3.51813068812639	MAP3K7 S389	MAP3K7	S389	TKL
Omicron BA.1	16h	2.52555781271348	MAP3K7 S439	MAP3K7	S439	TKL
Omicron BA.1	16h	4.78830645917647	MTOR T1162	MTOR	T1162	PIKK
Omicron BA.1	16h	2.22929502373109	RIPK2 S434	RIPK2	S434	TKL
Omicron BA.1	16h	-2.12639673897753	MAPK7 S729	MAPK7	S729	CMGC
Omicron BA.1	16h	-2.5262598915853	MAPK7 T731	MAPK7	T731	CMGC
Omicron BA.1	16h	3.41688644976248	RAF1 S621	RAF1	S621	TKL
Omicron BA.1	16h	-2.69895289058373	SRPK2 S508	SRPK2	S508	CMGC
Omicron BA.1	16h	-3.00194304355661	SRPK2 S511	SRPK2	S511	CMGC
Omicron BA.1	16h	2.16496265785428	STK10 S438	STK10	S438	STE
Omicron BA.1	16h	6.24102697945678	RPS6KA4 S347	RPS6KA4	S347	AGC
Omicron BA.1	16h	5.01654183237895	RPS6KA4 S343	RPS6KA4	S343	AGC
Omicron BA.1	16h	-3.42312841964794	PRPF4B Y849	PRPF4B	Y849	CMGC
Omicron BA.1	16h	-2.1891669004772	CSNK1D S382	CSNK1D	S382	CK1
Omicron BA.1	16h	2.16746287938364	MAP4K4 S734	MAP4K4	S734	STE
Omicron BA.1	16h	2.54327696605987	MAP3K5 S874	MAP3K5	S874	STE
Omicron BA.1	16h	2.44674230680113	MINK1 S764	MINK1	S764	STE
Omicron BA.1	16h	2.40568714964466	TNIK S769	TNIK	S769	STE
Omicron BA.1	16h	3.03047326181773	ATR T1989	ATR	T1989	PIKK
Omicron BA.1	16h	2.39275020323008	LATS1 S613	LATS1	S613	AGC
Omicron BA.1	16h	5.43541336704794	PKN2 S582	PKN2	S582	AGC
Omicron BA.1	16h	2.57403864398478	PKN1 S562	PKN1	S562	AGC
Omicron BA.1	16h	4.76556077332106	TRPM7 S1404	TRPM7	S1404	Alpha
Omicron BA.1	16h	-2.71981348173975	AAK1 S572	AAK1	S572	Other
Omicron BA.1	16h	-2.5527956351144	AAK1 T568	AAK1	T568	Other
Omicron BA.1	16h	4.48183921190324	CDK18 Y155	CDK18	Y155	CMGC
Omicron BA.1	16h	-2.41376710091244	CDK12 T692	CDK12	T692	CMGC
Omicron BA.1	16h	-3.5739343754708	ULK1 S489	ULK1	S489	Other
Omicron BA.1	16h	-3.3708249263359	CAMK1 S363	CAMK1	S363	CAMK
Omicron BA.1	16h	2.01282376724654	STK39 S283	STK39	S283	STE
Omicron BA.1	16h	-2.27517828809535	CDK12 S685	CDK12	S685	CMGC
Omicron BA.1	16h	3.64222689960497	MARK2 S455	MARK2	S455	CAMK
Omicron BA.5	16h	3.05392088865687	MAP3K7 S389	MAP3K7	S389	TKL
Omicron BA.5	16h	3.07892334081475	MTOR T1162	MTOR	T1162	PIKK
Omicron BA.5	16h	2.06743047563136	RAF1 S621	RAF1	S621	TKL
Omicron BA.5	16h	2.00331516001971	MAPK1 Y187	MAPK1	Y187	CMGC
Omicron BA.5	16h	3.58080218376517	MAPK1 T185	MAPK1	T185	CMGC
Omicron BA.5	16h	-5.2919293349888	SRPK2 S508	SRPK2	S508	CMGC
Omicron BA.5	16h	-5.83704622662039	SRPK2 S511	SRPK2	S511	CMGC
Omicron BA.5	16h	2.06486657040538	STK10 S438	STK10	S438	STE
Omicron BA.5	16h	3.83368735918339	RPS6KA4 S347	RPS6KA4	S347	AGC
Omicron BA.5	16h	-2.09611393635651	RPS6KA4 S678	RPS6KA4	S678	AGC
Omicron BA.5	16h	2.3426228340789	CSNK1D S382	CSNK1D	S382	CK1
Omicron BA.5	16h	3.69706635044398	MAP3K5 S874	MAP3K5	S874	STE
Omicron BA.5	16h	3.02942173477873	TNIK S680	TNIK	S680	STE
Omicron BA.5	16h	3.65051098213089	MINK1 S779	MINK1	S779	STE
Omicron BA.5	16h	2.98485406238903	MAP4K4 S643	MAP4K4	S643	STE
Omicron BA.5	16h	3.17661072681028	MAP3K5 S878	MAP3K5	S878	STE
Omicron BA.5	16h	3.08184755836436	TNIK S769	TNIK	S769	STE
Omicron BA.5	16h	2.30709150061403	MAP4K4 S884	MAP4K4	S884	STE
Omicron BA.5	16h	2.86925272651116	MAP4K4 S734	MAP4K4	S734	STE
Omicron BA.5	16h	2.86921331735296	MINK1 S764	MINK1	S764	STE
Omicron BA.5	16h	3.35164355843657	ATR T1989	ATR	T1989	PIKK
Omicron BA.5	16h	3.31115511107514	CHEK1 S553	CHEK1	S553	CAMK
Omicron BA.5	16h	-2.79734908589616	LATS1 S464	LATS1	S464	AGC
Omicron BA.5	16h	2.70227872311815	LATS1 S613	LATS1	S613	AGC
Omicron BA.5	16h	4.89466714049257	PKN2 S582	PKN2	S582	AGC
Omicron BA.5	16h	3.78526024442715	PKN2 S359	PKN2	S359	AGC
Omicron BA.5	16h	4.65701841519799	PKN1 S562	PKN1	S562	AGC
Omicron BA.5	16h	2.04302879933088	PKN1 S918	PKN1	S918	AGC
Omicron BA.5	16h	3.36631369403672	PRKD3 S41	PRKD3	S41	CAMK
Omicron BA.5	16h	-3.87507593647518	AAK1 S572	AAK1	S572	Other
Omicron BA.5	16h	-5.2537272578927	AAK1 T568	AAK1	T568	Other
Omicron BA.5	16h	2.03723877213525	AAK1 S585	AAK1	S585	Other
Omicron BA.5	16h	5.75500386085591	CDK18 Y155	CDK18	Y155	CMGC
Omicron BA.5	16h	3.61626447200492	MARK2 S516	MARK2	S516	CAMK
Omicron BA.5	16h	2.01500045594204	NEK4 S563	NEK4	S563	Other
Omicron BA.5	16h	2.02776100676281	TLK1 S49	TLK1	S49	Other
Omicron BA.5	16h	2.19821952272674	PBK S59	PBK	S59	Other
Omicron BA.5	16h	3.50890791863363	MARK2 S455	MARK2	S455	CAMK
Alpha	36hpi	5.09418640768194	RIPK2 S434	RIPK2	S434	TKL
Alpha	36hpi	3.43965187668275	MTOR T1162	MTOR	T1162	PIKK
Alpha	36hpi	4.45254783649198	RAF1 S621	RAF1	S621	TKL
Alpha	36hpi	-2.98163330524913	MAPK7 S729	MAPK7	S729	CMGC
Alpha	36hpi	-3.39581659295353	MAPK7 T731	MAPK7	T731	CMGC
Alpha	36hpi	3.04065611345732	MAPK1 T185	MAPK1	T185	CMGC
Alpha	36hpi	7.35572132249235	RPS6KA4 S347	RPS6KA4	S347	AGC
Alpha	36hpi	6.13123617541452	RPS6KA4 S343	RPS6KA4	S343	AGC
Alpha	36hpi	-3.26999427985461	PRPF4B Y849	PRPF4B	Y849	CMGC
Alpha	36hpi	-4.68176977044951	CSNK1D S382	CSNK1D	S382	CK1
Alpha	36hpi	2.6479217034807	MINK1 S779	MINK1	S779	STE
Alpha	36hpi	3.015733010076	TNIK S680	TNIK	S680	STE
Alpha	36hpi	2.9327332424502	MAP3K5 S874	MAP3K5	S874	STE
Alpha	36hpi	4.05368209652939	ATR T1989	ATR	T1989	PIKK
Alpha	36hpi	4.18369722290769	CHEK1 S553	CHEK1	S553	CAMK
Alpha	36hpi	2.51483792642972	LATS1 S613	LATS1	S613	AGC
Alpha	36hpi	3.05483602774759	PKN1 S562	PKN1	S562	AGC
Alpha	36hpi	5.46591906718494	PKN2 S582	PKN2	S582	AGC
Alpha	36hpi	-3.89431348845354	AAK1 S572	AAK1	S572	Other
Alpha	36hpi	-2.01344706239659	AAK1 T568	AAK1	T568	Other
Alpha	36hpi	2.6012286073257	CDK18 Y155	CDK18	Y155	CMGC
Alpha	36hpi	3.33400654457035	MARK2 S516	MARK2	S516	CAMK
Beta	36h	-3.16486839479966	MAP3K7 S439	MAP3K7	S439	TKL
Beta	36h	5.94098463214434	MTOR T1162	MTOR	T1162	PIKK
Beta	36h	-2.0409040055672	MAPK7 T731	MAPK7	T731	CMGC
Beta	36h	-2.54930310146513	RAF1 S301	RAF1	S301	TKL
Beta	36h	2.34751670425851	MAPK1 T185	MAPK1	T185	CMGC
Beta	36h	-2.20389413162872	SRPK2 S511	SRPK2	S511	CMGC
Beta	36h	-2.36701765485239	SRPK2 S508	SRPK2	S508	CMGC
Beta	36h	-2.76559146239299	MAPK8 S377	MAPK8	S377	CMGC
Beta	36h	5.7257906700984	RPS6KA4 S347	RPS6KA4	S347	AGC
Beta	36h	4.4595285909413	RPS6KA4 S343	RPS6KA4	S343	AGC
Beta	36h	-2.28235024900707	PRPF4B S520	PRPF4B	S520	CMGC
Beta	36h	-3.39685725507305	CSNK1D S382	CSNK1D	S382	CK1
Beta	36h	2.51950977487473	MINK1 S764	MINK1	S764	STE
Beta	36h	2.00337324649867	MAP3K5 S878	MAP3K5	S878	STE
Beta	36h	2.15962784149601	MAP3K5 S874	MAP3K5	S874	STE
Beta	36h	2.8710441569528	TNIK S680	TNIK	S680	STE
Beta	36h	4.24890412444675	ATR T1989	ATR	T1989	PIKK
Beta	36h	5.8010436463669	LATS1 S613	LATS1	S613	AGC
Beta	36h	4.02235759044075	PKN1 S562	PKN1	S562	AGC
Beta	36h	2.5064874534782	PKN2 S582	PKN2	S582	AGC
Beta	36h	2.96258959994553	TRPM7 S1404	TRPM7	S1404	Alpha
Beta	36h	-4.88623596195781	AAK1 S572	AAK1	S572	Other
Beta	36h	3.75108265514637	CDK18 Y155	CDK18	Y155	CMGC
Beta	36h	-2.01969473628622	MAP3K2 S240	MAP3K2	S240	STE
Delta	36h	2.38280719099615	MAP3K7 S389	MAP3K7	S389	TKL
Delta	36h	2.19062437528555	MTOR T1162	MTOR	T1162	PIKK
Delta	36h	4.36663313371353	RIPK2 S434	RIPK2	S434	TKL
Delta	36h	-3.38727707009295	MAPK7 S729	MAPK7	S729	CMGC
Delta	36h	-2.50866935313812	CDK7 T170	CDK7	T170	CMGC
Delta	36h	4.4938017912819	MAPK1 T185	MAPK1	T185	CMGC
Delta	36h	3.5158299628127	MAPK1 Y187	MAPK1	Y187	CMGC
Delta	36h	7.58812630278058	RPS6KA4 S347	RPS6KA4	S347	AGC
Delta	36h	6.36364115570275	RPS6KA4 S343	RPS6KA4	S343	AGC
Delta	36h	2.12369169069637	PRPF4B Y849	PRPF4B	Y849	CMGC
Delta	36h	-3.48284783034689	CSNK1D S382	CSNK1D	S382	CK1
Delta	36h	3.48925562883418	MINK1 S779	MINK1	S779	STE
Delta	36h	3.43378790082586	TNIK S680	TNIK	S680	STE
Delta	36h	2.63574173718648	MAP3K5 S878	MAP3K5	S878	STE
Delta	36h	2.76540184982743	MINK1 S764	MINK1	S764	STE
Delta	36h	3.11861405302692	MAP4K4 S643	MAP4K4	S643	STE
Delta	36h	3.48804683372842	MAP3K5 S874	MAP3K5	S874	STE
Delta	36h	4.23461371024745	ATR T1989	ATR	T1989	PIKK
Delta	36h	2.06899736411368	CHEK1 S553	CHEK1	S553	CAMK
Delta	36h	4.27963419934528	LATS1 S613	LATS1	S613	AGC
Delta	36h	-6.88141937243471	LATS1 S464	LATS1	S464	AGC
Delta	36h	7.84070817401098	PKN2 S582	PKN2	S582	AGC
Delta	36h	3.96332879034652	PKN1 S562	PKN1	S562	AGC
Delta	36h	-4.02184444237407	AAK1 S572	AAK1	S572	Other
Delta	36h	2.95134538671344	MARK2 S516	MARK2	S516	CAMK
Delta	36h	2.08796390841921	TLK1 S49	TLK1	S49	Other
Omicron BA.1	36h	4.48443508811002	MAP3K7 S389	MAP3K7	S389	TKL
Omicron BA.1	36h	-2.56993992870546	MAP3K7 S439	MAP3K7	S439	TKL
Omicron BA.1	36h	3.95219533252769	MTOR T1162	MTOR	T1162	PIKK
Omicron BA.1	36h	3.48238340230081	RIPK2 S434	RIPK2	S434	TKL
Omicron BA.1	36h	-2.67201436939687	EIF2AK3 S564	EIF2AK3	S564	Other
Omicron BA.1	36h	-3.39076305391618	MAPK7 S729	MAPK7	S729	CMGC
Omicron BA.1	36h	2.64311255912539	RAF1 S301	RAF1	S301	TKL
Omicron BA.1	36h	2.75126485083528	RAF1 S621	RAF1	S621	TKL
Omicron BA.1	36h	2.34328588697972	MAPK1 Y187	MAPK1	Y187	CMGC
Omicron BA.1	36h	3.36584515957378	MAPK1 T185	MAPK1	T185	CMGC
Omicron BA.1	36h	2.29664824515244	STK10 S438	STK10	S438	STE
Omicron BA.1	36h	7.55027023267561	RPS6KA4 S347	RPS6KA4	S347	AGC
Omicron BA.1	36h	6.32578508559778	RPS6KA4 S343	RPS6KA4	S343	AGC
Omicron BA.1	36h	-3.05674025373274	PRPF4B Y849	PRPF4B	Y849	CMGC
Omicron BA.1	36h	4.6226559306934	MAP4K4 S643	MAP4K4	S643	STE
Omicron BA.1	36h	2.42598047070766	MAP4K4 S734	MAP4K4	S734	STE
Omicron BA.1	36h	4.01264159748875	MAP3K5 S874	MAP3K5	S874	STE
Omicron BA.1	36h	2.39401592471253	MINK1 S764	MINK1	S764	STE
Omicron BA.1	36h	3.16033650094681	MAP3K5 S878	MAP3K5	S878	STE
Omicron BA.1	36h	2.06010716388961	ATR T1989	ATR	T1989	PIKK
Omicron BA.1	36h	3.94050443268151	LATS1 S613	LATS1	S613	AGC
Omicron BA.1	36h	7.95031826549894	PKN2 S582	PKN2	S582	AGC
Omicron BA.1	36h	4.52429447417365	PKN1 S562	PKN1	S562	AGC
Omicron BA.1	36h	2.64206764333069	SLK S780	SLK	S780	STE
Omicron BA.1	36h	4.6597294780916	TRPM7 S1404	TRPM7	S1404	Alpha
Omicron BA.1	36h	2.36581400782898	TLK1 S49	TLK1	S49	Other
Omicron BA.5	36h	5.382513111272	MTOR T1162	MTOR	T1162	PIKK
Omicron BA.5	36h	3.43919996691797	RIPK2 S434	RIPK2	S434	TKL
Omicron BA.5	36h	-4.64380325182717	MAPK7 T731	MAPK7	T731	CMGC
Omicron BA.5	36h	-2.17938411673366	MAPK7 S729	MAPK7	S729	CMGC
Omicron BA.5	36h	2.02346815970681	RAF1 S621	RAF1	S621	TKL
Omicron BA.5	36h	3.35245005576293	MAPK1 T185	MAPK1	T185	CMGC
Omicron BA.5	36h	-2.19360412161356	SRPK2 S508	SRPK2	S508	CMGC
Omicron BA.5	36h	2.15195202650141	STK10 S438	STK10	S438	STE
Omicron BA.5	36h	7.26563174299275	RPS6KA4 S347	RPS6KA4	S347	AGC
Omicron BA.5	36h	6.04114659591492	RPS6KA4 S343	RPS6KA4	S343	AGC
Omicron BA.5	36h	3.92377643918605	MAP3K5 S874	MAP3K5	S874	STE
Omicron BA.5	36h	2.88330412004073	TNIK S680	TNIK	S680	STE
Omicron BA.5	36h	3.07147134264411	MAP3K5 S878	MAP3K5	S878	STE
Omicron BA.5	36h	2.74319343408446	MINK1 S764	MINK1	S764	STE
Omicron BA.5	36h	3.54161793709249	ATR T1989	ATR	T1989	PIKK
Omicron BA.5	36h	2.73129755745964	LATS1 S613	LATS1	S613	AGC
Omicron BA.5	36h	7.68187167286021	PKN2 S582	PKN2	S582	AGC
Omicron BA.5	36h	2.99767382244664	PKN1 S562	PKN1	S562	AGC
Omicron BA.5	36h	2.08809224713439	PRKD3 S41	PRKD3	S41	CAMK
Omicron BA.5	36h	-3.50619371345151	AAK1 T568	AAK1	T568	Other
Omicron BA.5	36h	2.73016748799638	AAK1 S585	AAK1	S585	Other
Omicron BA.5	36h	3.01641169683042	CDK18 Y155	CDK18	Y155	CMGC
Omicron BA.5	36h	2.68353034064341	MARK2 S516	MARK2	S516	CAMK
