# Supplementary material for: The comprehensive SARS-CoV-2 ‘hijackome’ knowledge base
Source: Cell Discov. 2024 Dec 9;10:125. doi: 10.1038/s41421-024-00748-y (PMC11628605; doi:10.1038/s41421-024-00748-y)
Supplement: Supplementary file 5 — Supplementary Table S5 [file 41421_2024_748_MOESM5_ESM.xlsx]

## Sheet: Info
	EV05 - Microscopy comments
	Sheet	Description
	Microscopy comments	List of all detetec constructs and thei localization seen in immunofluorescence microscopy

## Sheet: Microscopy comments
Plate 1	Location, plates 20220825	expression	/ expr	published Liu, 2021	comment
E	A1/A2	++		ER, Golgi	er, nuclear rim in green channel
E_P71L	A3/A4	-	-
N	A5/A6	?	-	Cytoplasmic	cytoplasm
N_D377Y	A7/A8	-	-
N_D3L	A9/A10	++			cytoplasm
N_D63G	A11/A12	++			cytoplasm
N_P80R	B1/B2	-	-
N_R203K+G204R	B3/B4	+	++		cytoplasm/ same
N_R203M	B5/B6	++			cyto
N_S235F	B7/B8	++			cyto
N_T205I	B9/B10	++			cyto or er with aggregation / same
NSP12	B11/B12	+	+	Cytoplasmic	er (or very dotted cyto) / same
NSP12_P314L	C1/C2	+	+		er (nsp12 was cytoplasmic in Liu 2021) / cyto, sometimes looks er-ish, especially in high expressors
NSP13	C3/C4	?	?	Cytoplasmic	looks cyto or er-ish in some cells, but cells are very unhappy in c3 / same
NSP13_E341D	C5/C6	??	?		looks cyto or er-ish in some cells, but cells are very unhappy in c3 / same
NSP13_P77L	C7/C8	-	+		- / cyto
NSP2	C9/C10	+	?	Cytoplasmic, pm	cyto, not that many cells / very few cells
NSP2_T85I	C11/C12	?	+		cyto, not that many cells / same
NSP3	D1/D2	-	-	Cytoplasmic (actin in n)
NSP3_A890D	D3/D4	+	?		dotted cyto ot er, but cells are very unhappy in d3 / same, very few cells
NSP3_K977Q	D5/D6	-	-
NSP5	D7/D8	?	?	Cytoplasmic, pm	cyto, very unhappy cells / same
NSP5_K90R	D9/D10	++			cyto
NSP6	D11/D12	+	+	ER, Golgi, giant vacuoles	er
NSP6_S107-109	E1/E2	++	-		er (I would say much less giant vacuole-like structures)
OmiC	E3/E4	+			er
OmiN	E5/E6	-	-		there was no expression in March
ORF3a	E7/E8	+		Plasma membrane, Golgi	golgi
ORF3a_Q57H	E9/E10	-	-
ORF3a_S253P	E11/E12	-	-
GFP	F1/F2	++
Plate 2	Location
ORF7a	A1/A2	++		Golgi	golgi, er
ORF7a_T120I	A3/A4	+	+		golgi, er
ORF7a_V82A	A5/A6	+			golgi, er
ORF8	A7/A8	++		Cytoplasmic, Golgi	er (er everywhere, so our phenotyping in Liu 2021 might be wrong)
ORF8_E92K	A9/A10	+			er
ORF8_Q27stop	A11/A12	+	+		seem like two distinct phenotypes, cyto and er, accumulation in nucleus sometimes; very polymorphic / same
ORF8_R52I	B1/B2	++			er, defferent from wt
S	B3/B4	++		ER, pm, Golgi	er, with weird perinuclear aggregates in high expressors (ER stress?)
S_A570D	B5/B6	+			er, with weird aggregates in high expressors
S_A701V	B7/B8	+			er, with weird aggregates in high expressors
S_D1118H	B9/B10	+			er, seems same er pattern, very few cells / will check b10 for better images
S_D138Y	B11/B12	+			er, with weird aggregates in high expressors/ will check b12 for better images
S_D215G	C1/C2	?			er, similar WT pattern very low expression / same
S_D614G	C3/C4	?	?		er, similar WT pattern very low expression / same
S_D80A	C5/C6	?	?		er, as in WT / same (few cells)
S_E484K	C7/C8	?	+		er, as in WT / same (not too many cells)
S_H655Y	C9/C10	?	?		er, as in WT / same (not too many cells)
S_K147N	C11/C12	-	?		er, seems same er pattern, very few cells / same
S_K417T	D1/D2	?	?		er, as in WT / same (not too many cells)
S_L18F	D3/D4	+			er, as in WT / same (not too many cells) Less ER aggregates, different from wt, in a way similar to S_D80A
S_L241-243	D5/D6	?	?		er, seems same er pattern, very few cells / same
S_L452R	D7/D8	?	+		er, as in WT / same (not too many cells)
S_N501Y	D9/D10	-	-
S_P26S	D11/D12	-	-
S_P681R	E1/E2	-	-
S_Q52R	E3/E4	+			er, as in WT
S_R190S	E5/E6	-	-
S_T1027I	E7/E8	?	+		er, as in WT / same (not too many cells)
S_T478K	E9/E10	-	-
S_T716I	E11/E12	??	?		cyto in e12? needs additional confirmation
S_V1176F	F1/F2	++			er, as in WT. lot of transfected cells
S_Y144-	F3/F4	-	-
